# Supplementary material for: Direct access toN-alkylated amines and iminesviaacceptorless dehydrogenative coupling catalyzed by a cobalt(ii)-NNN pincer complex
Source: Royal Society of Chemistry journal article supplement (doi:10.1039/c8cy00859k), 2018-01-01
Supplement: c8cy00859k1.pdf [file c8cy00859k1.pdf]

## Supporting Information

### Direct Access to *N*-Alkylated Amines and Imines *via* Acceptorless Dehydrogenative Coupling Catalyzed by Cobalt(II)-NNN Pincer Complex

Siba P. Midya,<sup>a</sup> Jayaraman Pitchaimani,<sup>b</sup> Vinod G. Landge,<sup>a</sup> Vedichi Madhu<sup>b\*</sup>, and  
Ekambaram Balaraman<sup>a\*</sup>

<sup>a</sup>*Organic Chemistry Division, Dr. Homi Bhabha Road, CSIR-National Chemical Laboratory (CSIR-NCL), Pune - 411008, India.*

<sup>b</sup>*Department of Chemistry, Karunya Institute of Technology and Sciences, Coimbatore - 641114, Tamil Nadu, India.*

### Contents

|                                                                   |          |
|-------------------------------------------------------------------|----------|
| 1. General Information                                            | S2       |
| 2. Experimental Section and Characterization of Products          | S3-S26   |
| 3. Mechanistic studies                                            | S27-S29  |
| 4. X-ray Crystal Structure Determination of <b>1</b> and <b>3</b> | S30-S42  |
| 5. References                                                     | S42      |
| 6. Copy of Spectra                                                | S43-S119 |

## 1. General Information

All catalytic experiments were carried out using standard Schlenk techniques. All solvents were reagent grade or better. Deuterated solvents were used as received. An *m*-xylene was refluxed over sodium/benzophenone and followed by distilled under argon atmosphere and stored over sodium. Cobalt salt precursors were used without additional purification. Most of the chemicals used in the catalytic reactions were purified according to standard procedure.<sup>S1</sup> Thin layer chromatography (TLC) was performed using silica gel precoated glass plates, which were visualized with UV light at 254 nm or under iodine. Column chromatography was performed with SiO<sub>2</sub> (SilicycleSilicaflash F60 (230-400 mesh)). <sup>1</sup>H NMR (200, 400 or 500 MHz), <sup>13</sup>C NMR (50, 100 or 126 MHz) spectra were recorded on the NMR spectrometer. Deuterated chloroform was used as the solvent, and chemical shift values ( $\delta$ ) are reported in parts per million relative to the residual signals of this solvent [ $\delta$  7.27 for <sup>1</sup>H (chloroform-d),  $\delta$  77.0 for <sup>13</sup>C (chloroform-d)]. Abbreviations used in the NMR follow-up experiments: br, broad; s, singlet; d, doublet; t, triplet; q, quartet; m, multiplet. GC analysis was carried out using a HP-5 column (30 m, 0.25 mm, 0.25 $\mu$ ). Mass spectra were obtained on a GCMS-QP 5000 instruments with ionization voltages of 70 eV. High resolution mass spectra (HRMS) were obtained on a High-resolution mass spectra (HRMS) by fast atom bombardment (FAB) using a double focusing magnetic sector mass spectrometer and electron impact (EI) ionization technique (magnetic sector-electric sector double focusing mass analyzer). Elemental analyses were performed on a Vario-EL cube elemental analyzer. Fourier transform infrared (FT-IR) FTIR analysis was carried out on a Perkin-Elmer Spectrometer. Optical absorption measurements were carried out by Shimadzu UV-vis-IR-3600 Plus spectrophotometer. Electron paramagnetic resonance spectra were recorded with a Bruker EMX-plus X-band spectrometer. The crystals were mounted on a Super Nova Dual source X-ray Diffractometer system (Agilent Technologies) equipped with a CCD area detector and operated at 250 W power (50 kV, 0.8 mA) to generate Mo K $\alpha$  radiation ( $\lambda$ = 0.71073 Å) and Cu K $\alpha$  radiation ( $\lambda$ = 1.54178 Å) at 298(2) K.

## 2. Experimental Section and Characterization of Products

### 2.1 Synthesis of ligand and Cobalt-complexes

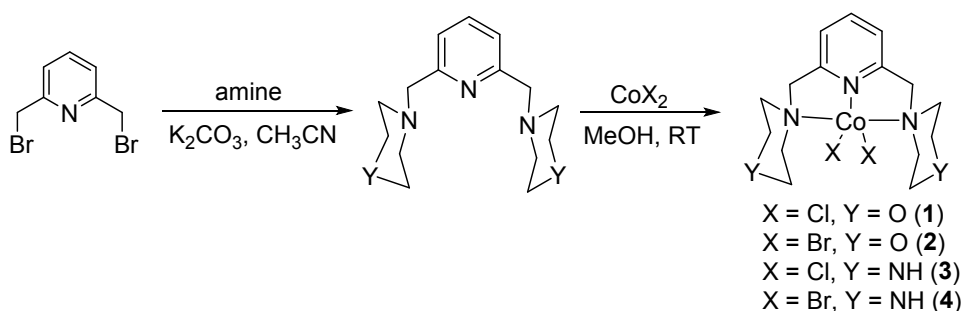

Scheme S1. Synthesis of Cobalt complexes (1-4)

#### 2.1.1 Synthesis of Ligand

##### 2,6-bis(morpholinomethyl)pyridine ( $L_1$ )<sup>S2</sup>

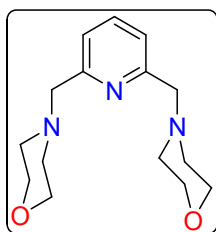

To a solution of 2,6-Bis(bromomethyl)pyridine (0.3 g, 1.13 mmol) and  $K_2CO_3$  (0.468 g, 3.39 mmol) in MeCN (30 mL), a solution of morpholine (0.197 g, 2.26 mmol) in MeCN (15 mL) were added under the nitrogen atmosphere. The resulting reaction mixture was allowed to stir for 14 h at 80 °C followed by cooled to room temperature. The mixture was diluted with water and extracted with Chloroform (3 x 10 mL). The organic fraction was collected, dried over anhydrous  $Na_2SO_4$ , and evaporated in vacuum under the reduced pressure afforded **Py-N<sup>3</sup>**. Yield (0.280 g, 89 %). IR (KBr):  $\nu = 2800$  (m), 1575 (m), 1454 (m), 1298 (m), 1111 (s), 906 (m). <sup>1</sup>H NMR (200 MHz, CHLOROFORM-d)  $\delta = 7.64$  (t,  $J = 7.8$  1H), 7.33 (d,  $J = 7.6$  Hz, 2H), 3.76 - 3.72 (m, 8H), 3.67 (s, 4H), 2.54-2.50 (m, 8H). HRMS (EI):  $m/z$  Calcd for  $C_{15}H_{24}O_2N_3$ : 278.1869; Found: 278.1863.

## 2,6-bis(piperazin-1-ylmethyl)pyridine (L<sub>2</sub>)

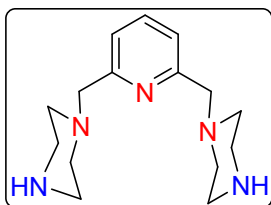

### Step-1: Synthesis of <sup>boc</sup>NNN (L<sub>2</sub>):

Solution of 2,6-bis(bromomethyl)pyridine (1 g, 3.77 mmol) in acetonitrile (40 mL) was added drop-wise to a solution of 1-boc-piperazine (1.4037 g, 7.54 mmol) and K<sub>2</sub>CO<sub>3</sub> (1.56 g, 1.13 mmol) in CH<sub>3</sub>CN (20 mL) and the resulting reaction mixture was allowed to stir for 14 hours at 85 °C. After cooled to room temperature, the solvent was evaporated under reduced pressure and the crude reaction mixture was extracted with chloroform (3 x 30 mL). The organic fraction were combined and dried over anhydrous Na<sub>2</sub>CO<sub>3</sub> and evaporated under vacuum to afford *N*-boc protected NNN-L1 as a yellow liquid. Yield: 0.8 g; 80%. <sup>1</sup>H NMR (400 MHz, CDCl<sub>3</sub>) δ 7.78 - 7.48 (m, 1H), 7.31 (dd, *J* = 13.3, 7.0 Hz, 2H), 4.12 - 3.52 (m, 4H), 3.58 - 3.30 (m, 8H), 2.72 - 2.28 (m, 7H), 1.94 (s, 1H), 1.73 - 1.18 (m, 18H). <sup>13</sup>C NMR (400 MHz, CDCl<sub>3</sub>) δ 157.77, 154.81, 136.74, 121.43, 79.60, 64.45, 53.08, 28.43. HRMS (ESI): Calcd. For C<sub>25</sub>H<sub>41</sub>N<sub>5</sub>O<sub>4</sub> [M+H]<sup>+</sup> 475.62; found 476.3244.

### Step-2, Synthesis of NNN-L<sub>2</sub>:

<sup>boc</sup>NNN-L1 (0.8 g) was dissolved in MeOH (15 mL) followed by addition of 1N HCl (8 mL), then the mixture was allowed to stir for 6 hrs at 60 °C. After cooling the reaction mixture to room temperature, it was neutralized with aqueous solution of 5% NaHCO<sub>3</sub>, then the solvent was evaporated under reduced pressure. The resulting product was further dissolved in ethanol and filtered. The filtrate was concentrated under vacuum and afforded NNN-L<sub>2</sub> (Yellow liquid). Yield (0.75 g, 75%). <sup>1</sup>H NMR (500 MHz, CHLOROFORM-d) δ = 7.62 (s, 1 H), 7.30 (d, *J* = 8.4 Hz, 2 H), 3.65 (s, 4 H), 2.92 (t, *J* = 4.8 Hz, 8 H), 2.49 (brs, 9 H), 2.07 (brs, 2 H). <sup>13</sup>C NMR (126 MHz, CHLOROFORM-d) δ = 157.8, 136.6, 121.4, 77.3, 76.7, 65.0, 54.6, 45.9. HRMS (ESI): calcd. For C<sub>15</sub>H<sub>25</sub>N<sub>5</sub> [M+H]<sup>+</sup> 275.39; found 276.21.

## 2.1.2 Synthesis of Cobalt-complexes

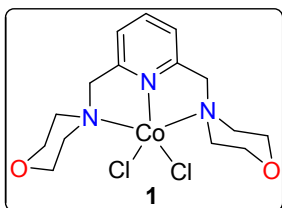

To a solution of **Py-N<sup>3</sup>(L<sub>1</sub>)** (0.1 g, 0.36 mmol) in MeOH (10 mL), a CoCl<sub>2</sub> (0.047 g, 0.36 mmol) was added and the resulted mixer was stirred at RT for 3 h. Diethyl ether was allowed to diffuse on to the resulting mixture for 2 days. The deep blue colour Co crystals were formed which was collected and washed with ether.

Yield (0.118 g, 81 %).

**IR** (KBr): 3403, 2960, 2871, 2839, 1613, 1453, 1292, 1112, 997, 868 cm<sup>-1</sup>.

**UV-Visible** spectra of **1** recorded in acetonitrile show absorption centered at 588 and 652 nm.

**HRMS (EI)**: *m/z* Calcd for C<sub>15</sub>H<sub>24</sub>Cl<sub>2</sub>N<sub>3</sub>CoO<sub>2</sub> [M+H]<sup>+</sup>: 407.0499; Found: 407.0493.

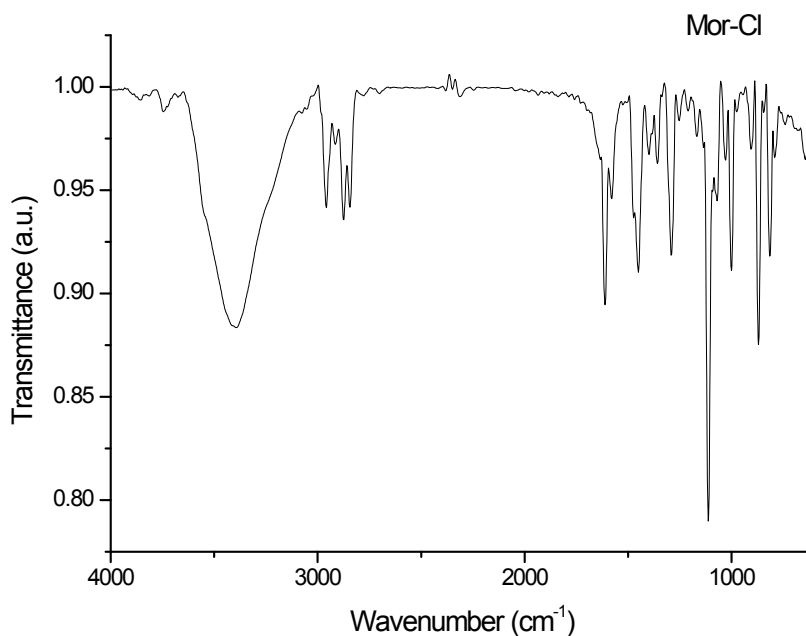

**Figure S1.** IR spectrum of **1**

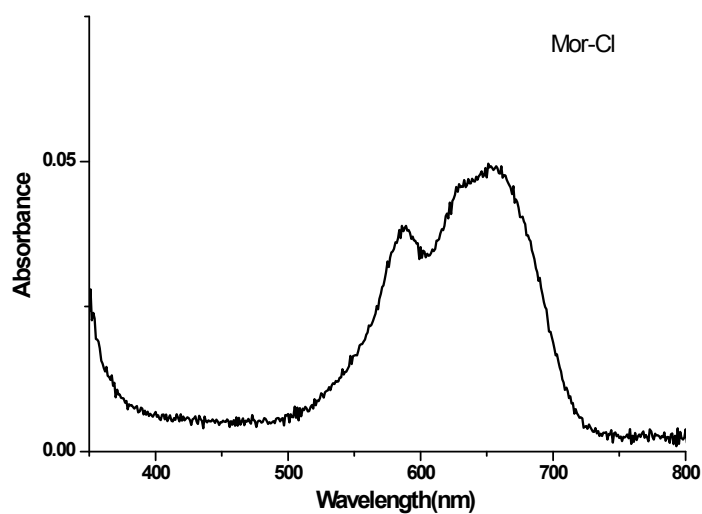

**Figure S2.** UV spectrum of **1**.

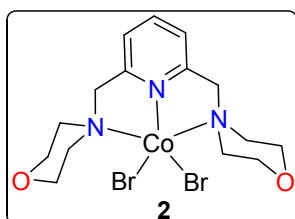

To a solution of **Py-N<sup>3</sup>(L<sub>2</sub>)** (0.1 g, 0.36 mmol) in MeOH (10 mL), a CoBr<sub>2</sub> (0.078 g, 0.36 mmol) was added and the resulting mixture was stirred at RT for 3 h. Diethyl ether was allowed to diffuse on to the resulting mixture for 2 days. The deep blue colour Co crystals were formed which were collected and washed with ether.

Yield (0.149 g, 84%).

**IR** (KBr): 3744, 2962, 2844, 2360, 1611, 1575, 1454, 1441, 1358, 1287, 1112, 1001, 871, 815, 787, 636 cm<sup>-1</sup>.

**UV-Visible** spectra of **2** recorded in acetonitrile show absorption centered at 600 and 642 nm.

**HRMS (EI):** *m/z* Calcd for C<sub>15</sub>H<sub>24</sub>Br<sub>2</sub>N<sub>3</sub>CoO<sub>2</sub> [M+H]<sup>+</sup>: 494.9567; Found: 494.9562.

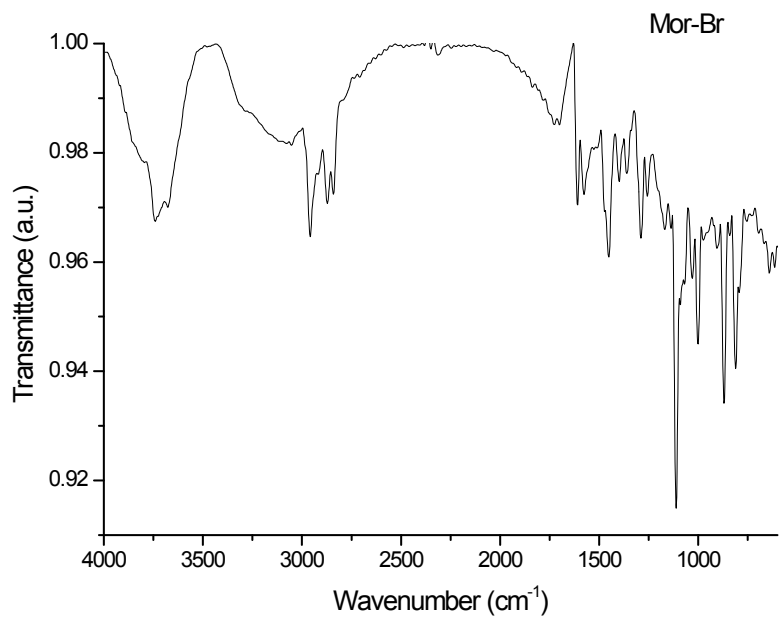

**Figure S3.** IR spectrum of **2**.

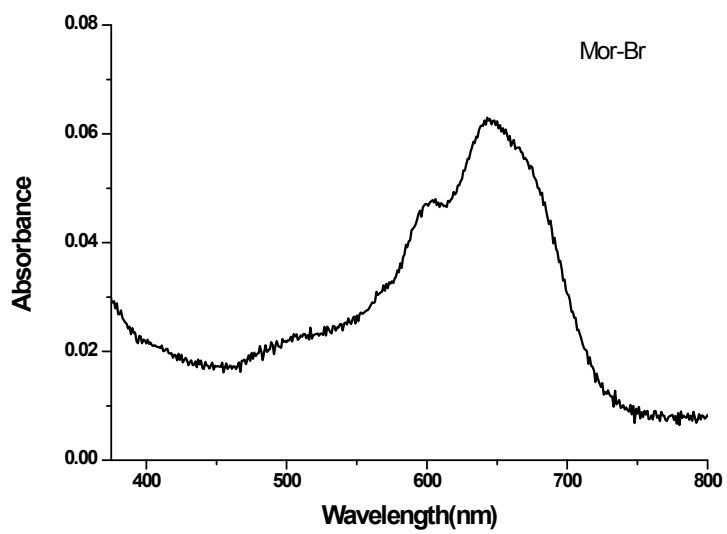

**Figure S4.** UV spectrum of **2**.

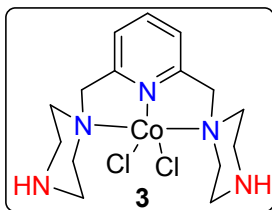

To a solution of **Py-N<sup>3</sup>(L<sub>2</sub>)** (0.1 g, 0.36 mmol) in MeOH (10 mL), a CoCl<sub>2</sub>·6H<sub>2</sub>O (0.086 g, 0.36 mmol) was added and the resulting mixture was stirred at RT for 3 h. Then, the solvent was evaporated under reduced pressure. The deep blue colour powder of catalyst **3** was formed, which was collected and washed with ether and dried.

**Yield** (0.097 g, 68 %).

**IR (KBr):** 3446, 1633, 1460, 1165, 989, 613 cm<sup>-1</sup>.

**Elemental Analysis** (C<sub>15</sub>H<sub>25</sub>Cl<sub>2</sub>CoN<sub>5</sub>) C, H, N: Calcd 44.46, 6.22, 17.28. Found: 44.33, 6.21, 17.30.

**UV-Visible spectra** of catalyst **3** recorded in acetonitrile show absorption centered at 615 and 687 nm.

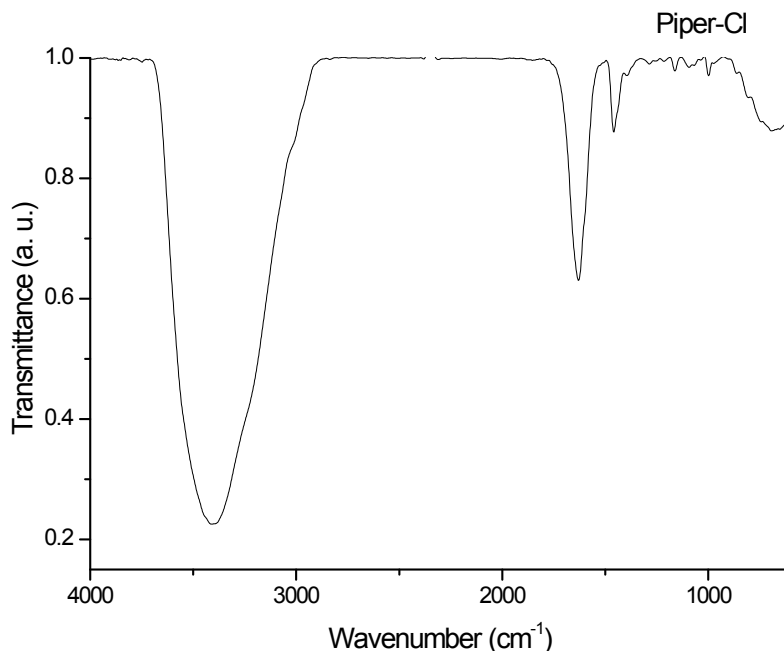

**Figure S5.** IR spectrum of **3**



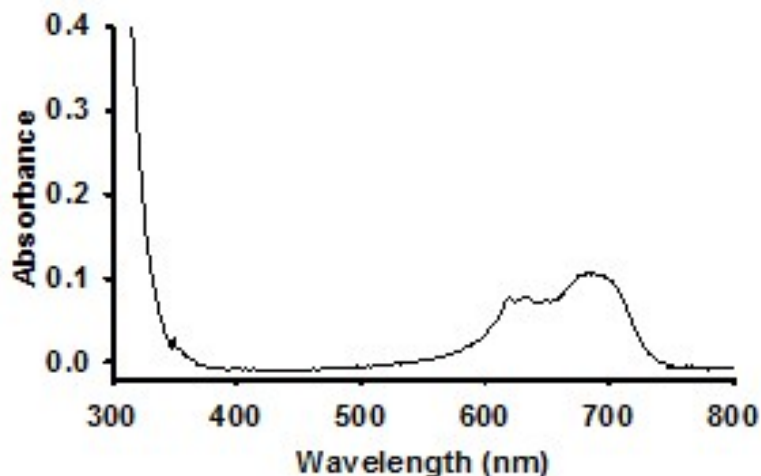

**Figure S6.** UV spectrum of **3**.

**Crystallization procedure (3):** The catalyst **3** (0.02 g, 0.048 mmol) was suspended in dry CH<sub>3</sub>CN (5 mL), to this solution NaBF<sub>4</sub> (0.012 g, 0.11 mmol) was added followed by the reaction mixture was stirred for half an hour at RT; the resulting mixer was filtered. The compound was crystallized with diethyl ether diffusion into filtrate at room temperature. After 4 days blue color needle crystal was formed. The crystals were suitable for single crystal X-ray crystallography.

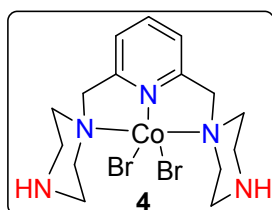

**Synthesis of complex 4 (NNN<sup>pip</sup>-CoBr<sub>2</sub>):** A solution of CoBr<sub>2</sub> (0.04 g, 0.18 mmol) in MeOH (2 mL) was added drop wise to a stirred solution of Py-NNN<sup>pip</sup> (0.05 g, 0.18 mmol) in MeOH (3 mL). This reaction mixture stirred at room temperature for 3-4 h. Then the solvent was evaporated in vacuum under reduced pressure afforded blue powder as product, yield (0.079 g, 90 %).

## 2.2 Optimization conditions

**Table S1:** Screening of catalyst<sup>a</sup>

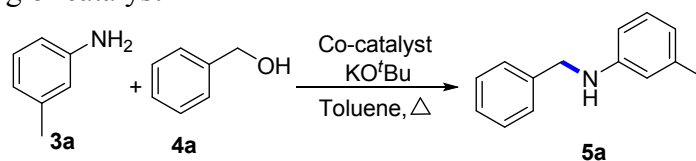

| Entry    | Catalyst                                               | Yield (%) <sup>b</sup> |
|----------|--------------------------------------------------------|------------------------|
| 1        | Cat. 1                                                 | 32                     |
| <b>2</b> | <b>Cat. 2</b>                                          | <b>56</b>              |
| 3        | Cat. 3                                                 | 51                     |
| 4        | CoBr <sub>2</sub>                                      | 12                     |
| 5        | CoBr <sub>2</sub> /Py-N <sup>3</sup> (L <sub>1</sub> ) | 24                     |
| 6        | -                                                      | 4                      |

<sup>a</sup>Reactions were performed using *m*-toluidine **3a** (0.25 mmol), benzyl alcohol **4a** (0.275 mmol), catalyst (2.5 mol%), KO<sup>t</sup>Bu (1.1 equiv.) using 1 mL of toluene as solvent at 130 °C.

<sup>b</sup>Yield determined by GC using 1,4-dibromo butane as an internal standard.

**Table S2:** Screening of solvent<sup>a</sup>

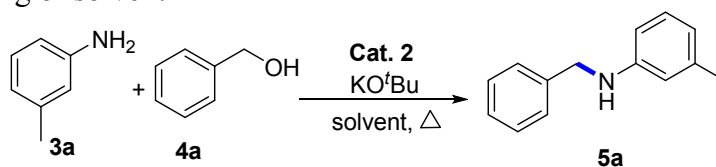

| Entry    | Solvent         | Yield (%) <sup>b</sup> |
|----------|-----------------|------------------------|
| 1        | Xylene          | 48                     |
| 2        | Mesitylene      | 33                     |
| 3        | DMF             | Trace                  |
| 4        | THF             | 49                     |
| 5        | MeCN            | NR                     |
| <b>6</b> | <b>n-Octane</b> | <b>72</b>              |
| 7        | 1,2 DCE         | NR                     |
| 8        | 1,4 Dioxane     | 58                     |

<sup>a</sup>Reactions were performed using *m*-toluidine **3a** (0.25 mmol), benzyl alcohol **4a** (0.275 mmol), catalyst **2** (2.5 mol%), KO<sup>t</sup>Bu (1.1 equiv.) using 1 mL of solvent at 130 °C. <sup>b</sup>Yield determined by GC using 1,4-dibromo butane as an internal standard. NR = No reaction.

**Table S3:** Screening of temperature<sup>a</sup>

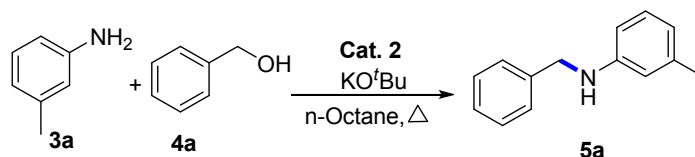

| Entry    | Temperature (°C) | Yield (%) <sup>b</sup> |
|----------|------------------|------------------------|
| 1        | RT               | NR                     |
| 2        | 60 °C            | NR                     |
| 3        | 80 °C            | 8                      |
| 4        | 100 °C           | 37                     |
| 5        | 120 °C           | 66                     |
| <b>6</b> | <b>150 °C</b>    | <b>84</b>              |

<sup>a</sup>Reactions were performed using *m*-toluidine **3a** (0.25 mmol), benzyl alcohol **4a** (0.275 mmol), catalyst **2** (2.5 mol%), KO<sup>t</sup>Bu (1.1 equiv.) using 1 mL of n-Octane at different temperature. <sup>b</sup>Yield determined by GC using 1,4-dibromo butane as an internal standard. NR = No reaction.

**Table S4:** Screening of base<sup>a</sup>

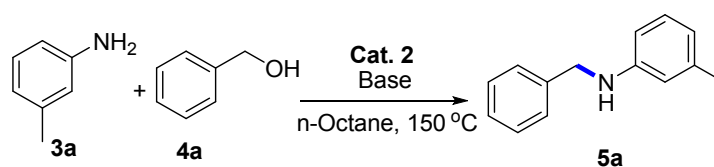

| Entry | Base                | Yield (%) <sup>b</sup> |
|-------|---------------------|------------------------|
| 1     | NaO <sup>t</sup> Bu | 27                     |
| 2     | LiO <sup>t</sup> Bu | NR                     |
| 3     | KOH                 | 68                     |

|   |                    |    |
|---|--------------------|----|
| 4 | NaOAc              | 4  |
| 5 | KOAc               | 6  |
| 6 | KO <sup>t</sup> Pr | 71 |
| 7 | -                  | NR |

<sup>a</sup>Reactions were performed using *m*-toluidine **3a** (0.25 mmol), benzyl alcohol **4a** (0.275mmol), catalyst **2** (2.5 mol%), Base (1.1 equiv.) using 1 mL of n-Octane at 150 °C. <sup>b</sup>Yield determined by GC using 1,4-dibromo butane as an internal standard. NR = No reaction.

**Table S5:** Screening of catalyst amount<sup>a</sup>

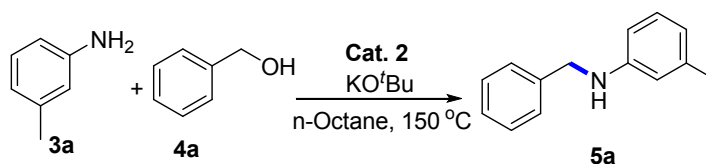

| Entry    | Catalyst <b>1</b><br>(mol%) | Yield (%) <sup>b</sup> |
|----------|-----------------------------|------------------------|
| 1        | 1 mol%                      | 63                     |
| 2        | 2 mol%                      | 78                     |
| 3        | 3 mol%                      | 89                     |
| <b>4</b> | <b>5 mol%</b>               | <b>93</b>              |

<sup>a</sup>Reactions were performed using amide **3a** (0.25 mmol), benzyl alcohol **4a** (0.275 mmol), catalyst **2** (mol%), KO<sup>t</sup>Bu (1.1 equiv.) using 1 mL of n-Octane at 150 °C. <sup>b</sup>Yield determined by GC using 1,4-dibromo butane as an internal standard.

### 2.2.1 Homogenous test:

To an oven-dried 15 mL ace pressure tube, amine **3a** (0.25 mmol), alcohol **4a** (0.275 mmol), Co-complex **2** (5 mol%), 10 equiv. of mercury, and n-Octane (2 mL) were added under a gentle stream of argon. The mixture was of heated at reflux for 32 h followed by cooling to room temperature and 82% GC yield of the product **5a** observed.

## 2.3 Synthesis and characterization of alkylated amine derivatives

### 2.3.1 Alkylation of *m*-toluidine with various alcohols

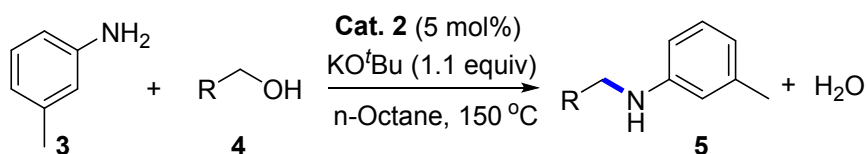

Scheme S2. Synthesis of alkylated *m*-toluidine (5a-i).

#### General procedure:

To an oven-dried 15 mL ace pressure tube, *m*-toluidine **3** (0.5 mmol), primary alcohol **4** (0.55 mmol), Co-complex **2** (5 mol%) and KO<sup>t</sup>Bu (1.1 equiv.) in n-octane (1 mL) were added under a gentle stream of argon. The mixture was of heated at 150 °C for 32 h followed by cooling to room temperature. The reaction mixture was diluted with water (4 mL) and extracted with dichloromethane (3 x 5 mL). The resultant organic layer was dried over anhydrous Na<sub>2</sub>SO<sub>4</sub> and the solvent was evaporated under reduced pressure. The crude mixture was purified by silica gel column chromatography (230-400 mesh size) using petroleum-ether/ethyl acetate as an eluting system.

### 2.3.2 Characterization alkylated amine derivatives

#### *N*-benzyl-3-methylaniline (5a)

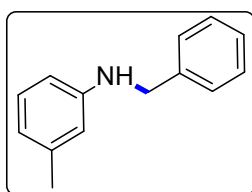

Colorless liquid. Yield: 90%. <sup>1</sup>H NMR (200 MHz, CHLOROFORM-d) δ = 7.35 - 7.28 (m, 5H), 7.05 (t, *J* = 7.6Hz, 1H), 6.52 (d, *J* = 7.3Hz, 1H), 6.45 - 6.41 (m, 2H), 4.29 (s, 2H), 3.93 (s, br, 1H), 2.26 (s, 3H). <sup>13</sup>C NMR (50 MHz, CHLOROFORM-d) δ = 148.17, 139.51, 138.98, 129.10, 128.56, 127.48, 127.14, 118.49, 113.60, 109.93, 48.31, 21.58.

### 3-methyl-*N*-(4-methylbenzyl)aniline (5b)

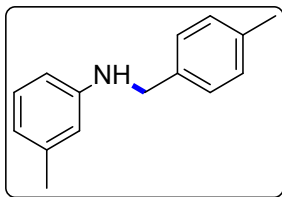

Colorless liquid. Yield: 92%.  $^1\text{H NMR}$  (500 MHz, CHLOROFORM-*d*)  $\delta$  7.28 (d,  $J = 8\text{Hz}$ , 2H), 7.17 (d,  $J = 8\text{Hz}$ , 2H), 7.08 (t,  $J = 8\text{Hz}$ , 1H), 6.56 (d,  $J = 7\text{Hz}$ , 1H), 6.50 - 6.44 (m, 2H), 4.29 (s, 2H), 3.93 (s, br, 1H), 2.36 (s, 3H), 2.29 (s, 3H).  $^{13}\text{C NMR}$  (126 MHz, CHLOROFORM-*d*)  $\delta$  148.27, 139.01, 136.82, 136.43, 129.26, 129.11, 127.52, 118.42, 113.57, 109.90, 48.08, 21.62, 21.09.

### *N*-(4-chlorobenzyl)-3-methylaniline (5c)

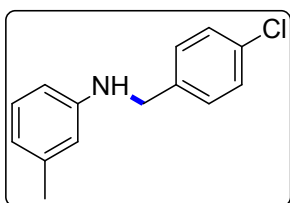

Colorless liquid. Yield: 77%.  $^1\text{H NMR}$  (200 MHz, CHLOROFORM-*d*)  $\delta$  7.31 (m, 4H), 7.07 (t,  $J = 8\text{Hz}$ , 1H), 6.57 (d,  $J = 7\text{Hz}$ , 1H), 6.49 - 6.36 (m, 2H), 4.31 (s, 2H), 4.01 (s, br, 1H), 2.28 (s, 3H).  $^{13}\text{C NMR}$  (50 MHz, CHLOROFORM-*d*)  $\delta$  147.88, 139.10, 138.10, 132.83, 129.17, 128.69, 118.77, 113.68, 109.98, 47.64, 21.60.

### *N*-(4-bromobenzyl)-3-methylaniline (5d)

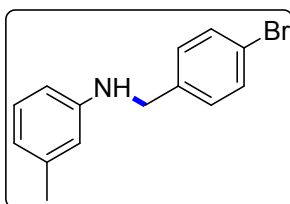

Colorless liquid. Yield: 65%.  $^1\text{H NMR}$  (200 MHz, CHLOROFORM-*d*)  $\delta$  7.54 - 7.42 (m, 2H), 7.29 (m, 2H), 7.11 - 7.01 (m, 1H), 6.66 - 6.51 (m, 1H), 6.50 - 6.37 (m, 2H), 4.30 (s, 1H), 4.01 (s, br, 1H), 2.27 (s, 3H).  $^{13}\text{C NMR}$  (50 MHz, CHLOROFORM-*d*)  $\delta$  147.86, 139.11, 138.66, 131.67, 129.17, 129.05, 118.80, 113.69, 110.00, 47.69, 21.60.

### 3-methyl-*N*-(2-methylbenzyl)aniline (5e)

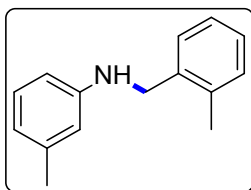

Colorless liquid. Yield: 47%.  $^1\text{H NMR}$  (200 MHz, CHLOROFORM-*d*)  $\delta$  7.43 - 7.35 (m, 1H), 7.31 - 7.23 (m, 3H), 7.20 - 7.09 (m, 1H), 6.66 - 6.48 (m, 3H), 4.32 (s, 2H), 3.84 (s, br, 1H), 2.44 (s, 3H), 2.35 (s, 3H).  $^{13}\text{C NMR}$  (50 MHz, CHLOROFORM-*d*)  $\delta$  148.36, 139.05, 137.11, 136.36, 130.37, 129.14, 128.31, 127.38, 126.13, 118.41, 113.43, 109.81, 46.42, 21.61, 18.89.

### *N*-(furan-2-ylmethyl)-3-methylaniline (5f)

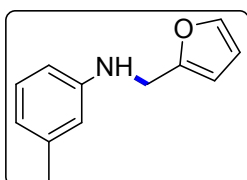

Colorless liquid. Yield: 63%.  $^1\text{H NMR}$  (500 MHz, CHLOROFORM-*d*)  $\delta$  7.38 (dd,  $J = 2$ , 1Hz, 1H), 7.18 - 7.05 (m, 1H), 6.58 (d,  $J = 8$ Hz, 1H), 6.53 - 6.46 (m, 2H), 6.33 (dd,  $J = 3$ , 2 Hz, 1H), 6.28 - 6.20 (m, 1H), 4.32 (s, 2H), 3.99 (s, br, 1H), 2.29 (s, 3H).  $^{13}\text{C NMR}$  (126 MHz, CHLOROFORM-*d*)  $\delta$  152.80, 147.65, 141.88, 139.01, 129.08, 118.96, 113.96, 110.31, 110.24, 106.91, 41.46, 21.61.

### *N*-hexyl-3-methylaniline (5g)

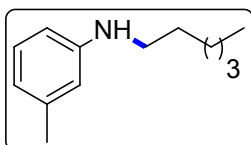

Colorless liquid. Yield: 69%.  $^1\text{H NMR}$  (500 MHz, CHLOROFORM-*d*)  $\delta$  7.09 (t,  $J = 8$ Hz, 1H), 6.55 (d,  $J = 7$ Hz, 1H), 6.50 - 6.43 (m, 2H), 3.62 (s, br, 1H), 3.12 (t,  $J = 7$ Hz, 2H), 2.31 (s, 3H), 1.59 - 1.70 (m, 2H), 1.39 - 1.48 (m, 2H), 1.26 - 1.39 (m, 4H), 0.87 - 0.98 (m, 3H).  $^{13}\text{C NMR}$  (126 MHz, CHLOROFORM-*d*)  $\delta$  148.51, 138.95, 129.05, 118.03, 113.46, 109.87, 44.03, 31.63, 29.54, 26.84, 22.61, 21.61, 14.03.

### *N*-decyl-3-methylaniline (**5h**)

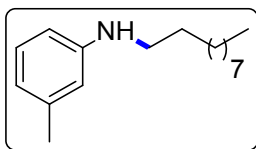

Colorless liquid. Yield: 71%.  $^1\text{H NMR}$  (200 MHz, CHLOROFORM-*d*)  $\delta$  6.99 - 7.14 (m, 1H), 6.51 (d,  $J = 7\text{Hz}$ , 1H), 6.45 - 6.37 (m, 2H), 3.50 (s, br, 1H), 3.09 (t,  $J = 7\text{Hz}$ , 2H), 2.27 (s, 3H), 1.64 - 1.54 (m, 2H), 1.38 - 1.25 (m, 14H), 0.85 - 0.93 (m, 3H).  $^{13}\text{C NMR}$  (50 MHz, CHLOROFORM-*d*)  $\delta$  148.60, 138.95, 129.07, 118.01, 113.46, 109.87, 44.02, 31.89, 29.61, 29.56, 29.44, 29.31, 27.18, 22.67, 21.61, 14.09.

### 3-methyl-*N*-(3-phenylpropyl)aniline (**5i**)

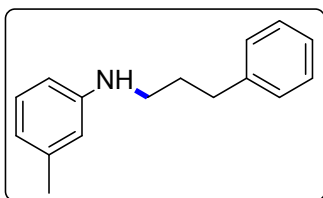

Colorless liquid. Yield: 40%.  $^1\text{H NMR}$  (500 MHz, CHLOROFORM-*d*)  $\delta$  7.29 - 7.36 (m, 16 H), 7.26 - 7.22 (m, 3H), 7.11 - 7.07 (m, 3H), 6.55 (d,  $J = 7\text{Hz}$ , 1H), 6.46 - 6.38 (m, 2H), 3.17 (t,  $J = 7\text{Hz}$ , 2H), 2.77 (t,  $J = 8\text{Hz}$ , 2H), 2.30 (s, 3H), 2.02 - 1.95 (m, 2H).  $^{13}\text{C NMR}$  (126 MHz, CHLOROFORM-*d*)  $\delta$  148.31, 141.67, 138.98, 129.42, 129.08, 128.40, 128.29, 128.04, 125.92, 118.18, 113.51, 109.94, 43.41, 33.36, 31.07, 21.61.

### 2.3.3 Alkylation of various anilines with benzyl alcohols

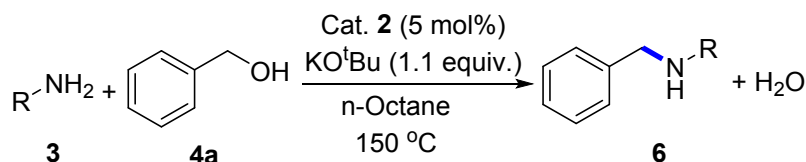

**Scheme S3.** Synthesis of alkylated amine derivatives of benzyl alcohol (**6a-k**)

#### General procedure:

To an oven-dried 15 mL ace pressure tube, amine **3** (0.5 mmol), benzyl alcohol **4** (0.55 mmol), Co-complex **2** (5 mol%) and KO<sup>t</sup>Bu (1.1 equiv.) in *n*-octane (1 mL) were added



under a gentle stream of argon. The mixture was heated at 150 °C for 32 h followed by cooling to room temperature. The reaction mixture was diluted with water (4 mL) and extracted with dichloromethane (3 x 5 mL). The resultant organic layer was dried over anhydrous Na<sub>2</sub>SO<sub>4</sub> and the solvent was evaporated under reduced pressure. The crude mixture was purified by silica gel column chromatography (230-400 mesh size) using petroleum-ether/ethyl acetate as an eluting system.

### 2.3.4 Characterization of benzylated amine products

#### *N*-benzyl-4-methoxyaniline (6a)

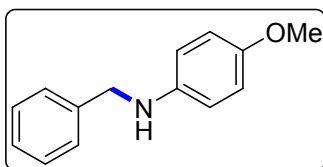

Colorless oil. Yield: 80%. <sup>1</sup>H NMR (500 MHz, CHLOROFORM-d) δ = 7.44 - 7.32 (m, 4H), 7.29 (d, *J* = 7Hz, 1H), 6.85 - 6.74 (m, 2H), 6.66 - 6.58 (m, 2H), 4.30 (s, 2H), 3.76 (s, 3H). <sup>13</sup>C NMR (126 MHz, CHLOROFORM-d) δ = 152.19, 142.44, 139.67, 128.57, 127.53, 127.15, 114.90, 114.09, 55.80, 49.24.

#### *N*-benzyl-4-(methylthio)aniline (6b)

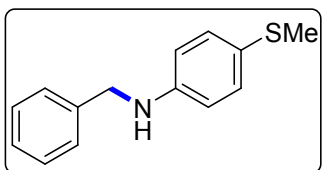

Colorless oil. Yield: 74%. <sup>1</sup>H NMR (200 MHz, CHLOROFORM-d) δ = 7.42 - 7.33 (m, 5H), 7.22 (d, *J* = 9Hz, 2H), 6.67 - 6.53 (m, 2H), 4.34 (s, 2H), 4.09 (s, br, 1H), 2.42 (s, 3H). <sup>13</sup>C NMR (50 MHz, CHLOROFORM-d) δ = 146.97, 131.48, 128.66, 127.43, 127.30, 113.45, 48.30, 19.12.

### ***N*-benzyl-4-methylaniline (6c)**

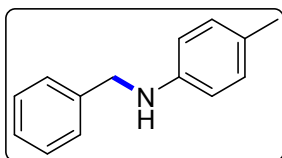

Colorless oil. Yield: 76%. **<sup>1</sup>H NMR** (200 MHz, CHLOROFORM-*d*)  $\delta$  = 7.37 - 7.29 (m, 5H), 7.00 - 6.92 (m, 2H), 6.54 (d,  $J$  = 9Hz, 2H), 4.27 (s, 2H), 3.86 (s, br, 1H), 2.22 (s, 3H). **<sup>13</sup>C NMR** (50 MHz, CHLOROFORM-*d*)  $\delta$  = 145.87, 139.62, 129.67, 128.52, 128.20, 127.42, 127.07, 112.93, 48.55, 20.33.

### ***N*-benzyl-4-fluoroaniline (6d)**

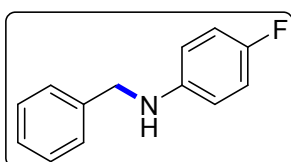

Colorless oil. Yield: 86%. **<sup>1</sup>H NMR** (200 MHz, CHLOROFORM-*d*)  $\delta$  = 7.42 - 7.27 (m, 5H), 6.88 (t,  $J$  = 9Hz, 2H), 6.56 (dd,  $J$  = 9, 4Hz, 2H), 4.29 (s, 2H), 3.95 (s, br, 1H). **<sup>13</sup>C NMR** (50 MHz, CHLOROFORM-*d*)  $\delta$  = 144.44, 139.21, 128.66, 127.48, 127.30, 115.87, 115.43, 113.72, 113.58, 48.95.

### ***N*-benzyl-3-fluoroaniline (6e)**

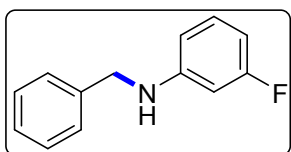

Colorless oil. Yield: 83%. **<sup>1</sup>H NMR** (200 MHz, CHLOROFORM-*d*)  $\delta$  = 7.47 - 7.28 (m, 5H), 7.19 - 7.02 (m, 1H), 6.51 - 6.28 (m, 3H), 4.33 (s, 2H), 4.19 (s, br, 1H). **<sup>13</sup>C NMR** (50 MHz, CHLOROFORM-*d*)  $\delta$  = 166.52, 161.70, 149.98, 149.77, 138.80, 130.37, 130.17, 128.71, 127.44, 127.40, 108.72, 108.67, 104.16, 103.73, 99.76, 99.26, 48.18.

### ***N*-benzyl-3-(trifluoromethyl)aniline (6f)**

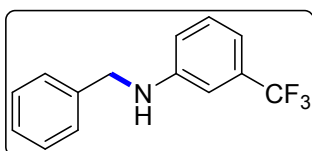

Colorless oil. Yield: 88%.  $^1\text{H NMR}$  (200 MHz, CHLOROFORM-*d*)  $\delta$  = 7.41 - 7.24 (m, 5H), 7.24 - 7.12 (m, 1H), 6.99 - 6.84 (m, 1H), 6.84 - 6.75 (m, 1H), 6.75 - 6.65 (m, 1H), 4.29 (s, 2H), 4.15 (s, br, 1H).  $^{13}\text{C NMR}$  (50 MHz, CHLOROFORM-*d*)  $\delta$  = 148.19, 138.55, 129.64, 128.74, 127.49, 115.66, 113.94, 113.86, 109.10, 109.02, 48.07.

***N*-benzyl-3-(trifluoromethyl)aniline (6g)**

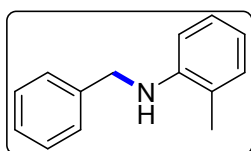

Colorless oil. Yield: 57%.  $^1\text{H NMR}$  (500 MHz, CHLOROFORM-*d*)  $\delta$  = 7.42 - 7.34 (m, 4H), 7.34 - 7.28 (m, 1H), 7.14 - 7.06 (m, 2H), 6.69 (t,  $J$  = 7Hz, 1H), 6.63 (d,  $J$  = 8Hz, 1H), 4.39 (s, 2H), 3.89 (s, br, 1H), 2.18 (s, 3H).  $^{13}\text{C NMR}$  (126 MHz, CHLOROFORM-*d*)  $\delta$  = 139.47, 130.06, 128.65, 127.54, 127.25, 127.14, 117.18, 109.97, 48.32, 17.54.

***N*-benzyl-2,5-dimethylaniline (6h)**

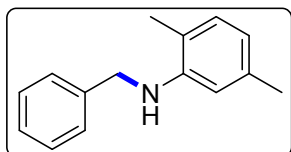

Colorless oil. Yield: 62%.  $^1\text{H NMR}$  (200 MHz, CHLOROFORM-*d*)  $\delta$  = 7.47 - 7.31 (m, 5H), 6.99 (d,  $J$  = 7Hz, 1H), 6.58 - 6.45 (m, 2H), 4.38 (s, 2H), 3.80 (s, br, 1H), 2.29 (s, 3H), 2.15 (s, 3H).  $^{13}\text{C NMR}$  (50 MHz, CHLOROFORM-*d*)  $\delta$  = 145.98, 139.58, 136.77, 129.91, 128.64, 127.62, 127.23, 118.94, 117.81, 110.83, 48.37, 21.53, 17.08.

***N*-benzylaniline (6i)**

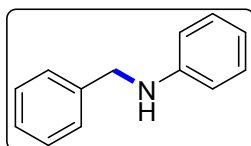

Colorless oil. Yield: 88%.  $^1\text{H NMR}$  (200 MHz, CHLOROFORM-*d*)  $\delta$  = 7.42 - 7.24 (m, 5H), 7.21 - 7.10 (m, 2H), 6.73 (dt,  $J$  = 7, 1Hz, 1H), 6.67 - 6.57 (m, 2H), 4.32 (s, 2H), 4.01 (s, br, 1H).  $^{13}\text{C NMR}$  (50 MHz, CHLOROFORM-*d*)  $\delta$  = 148.12, 139.41, 129.23, 128.60, 127.48, 127.19, 117.53, 112.81, 48.29.

### *N*-benzylquinolin-8-amine (6j)

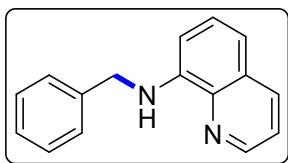

Colorless oil. Yield: 52%.  $^1\text{H NMR}$  (500 MHz, CHLOROFORM-*d*)  $\delta$  = 8.80 - 8.71 (m, 1H), 8.12 - 8.05 (m, 1H), 7.48 (d,  $J$  = 8Hz, 2H), 7.43 - 7.27 (m, 5H), 7.14 - 7.07 (m, 1H), 6.72 - 6.55 (m, 2H), 4.60 (s, 2H).  $^{13}\text{C NMR}$  (126 MHz, CHLOROFORM-*d*)  $\delta$  = 146.90, 144.53, 139.19, 138.18, 136.00, 128.59, 127.73, 127.38, 127.10, 121.39, 114.11, 105.09, 47.66.

### *N*-benzylpyridin-2-amine (6k)

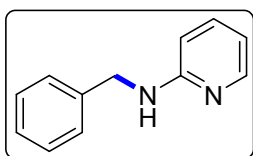

Colorless oil. Yield: 63%.  $^1\text{H NMR}$  (500 MHz, CHLOROFORM-*d*)  $\delta$  = 8.15 - 8.01 (m, 1H), 7.42 - 7.18 (m, 6H), 6.62 - 6.52 (m, 1H), 6.40 - 6.31 (m, 1H), 4.93 (s, br, 1H), 4.50 (s, 3H).  $^{13}\text{C NMR}$  (126 MHz, CHLOROFORM-*d*)  $\delta$  = 158.62, 148.19, 139.15, 137.43, 128.61, 127.37, 127.20, 113.13, 106.76, 46.29.

## 2.4 Synthesis and characterization of alkylated phenylenediamines

### 2.4.1 Synthesis of alkylated phenylenediamine

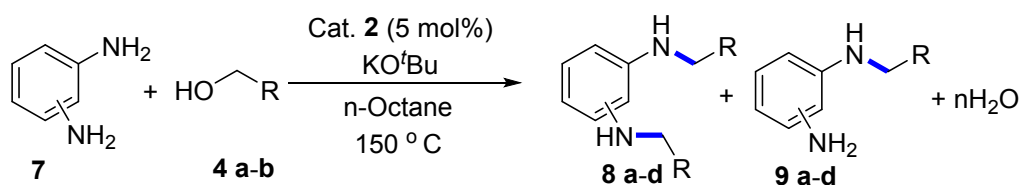

**Scheme S4.** Synthesis of mono- and bis-alkylated phenylenediamine

#### General procedure:

To an oven-dried 15 mL ace pressure tube, phenylenediamine **7** (0.5 mmol), primary alcohol **4** (1 mmol and 2 mmol respectively), Co-complex **2** (5 mol%) and KO<sup>t</sup>Bu (1.1 equiv. and 2.2 equiv. respectively) in *n*-octane (1 mL) were added under a gentle stream of argon. The

mixture was heated at 150 °C for 32 h followed by cooling to room temperature. The reaction mixture was diluted with water (4 mL) and extracted with dichloromethane (3 x 5 mL). The resultant organic layer was dried over anhydrous Na<sub>2</sub>SO<sub>4</sub> and the solvent was evaporated under reduced pressure. The crude mixture was purified by silica gel column chromatography (230-400 mesh size) using petroleum-ether/ethyl acetate as an eluting system.

## 2.4.2 Characterization alkylated phenylenediamine derivatives

### *N*<sup>1</sup>, *N*<sup>3</sup>-dibenzylbenzene-1, 3-diamine (8a)

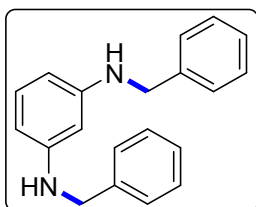

Light brown liquid. Yield: 49% and 62% respectively. <sup>1</sup>H NMR (500 MHz, CHLOROFORM-d) δ = 7.40 - 7.32 (m, 7H), 7.31 - 7.29 (m, 3H), 7.01 (t, *J* = 8Hz, 1H), 6.10 (dd, *J* = 8, 2Hz, 2H), 5.98 (s, 1H), 4.30 (s, 4H). <sup>13</sup>C NMR (126 MHz, CHLOROFORM-d) δ = 149.12, 139.40, 130.02, 128.57, 127.57, 127.16, 103.34, 48.45.

### *N*<sup>1</sup>, *N*<sup>3</sup>-bis(4-methylbenzyl)benzene-1, 3-diamine (8b)

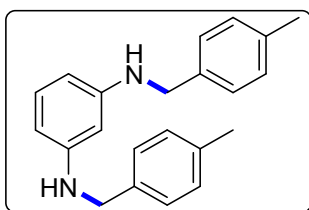

Light brown liquid. Yield: 42% and 50% respectively. <sup>1</sup>H NMR (200 MHz, CHLOROFORM-d) δ = 7.31 - 7.23 (m, 4H), 7.20 - 7.10 (m, 4H), 6.99 (t, *J* = 8Hz, 1H), 6.06 (dd, *J* = 8, 2Hz, 2H), 5.94 (s, 1H), 4.24 (s, 4H), 3.91 (s, br, 2H), 2.35 (s, 6H). <sup>13</sup>C NMR (50 MHz, CHLOROFORM-d) δ = 149.37, 136.74, 136.52, 129.98, 129.23, 127.54, 103.05, 97.27, 48.13, 21.08.

***N*<sup>1</sup>,*N*<sup>2</sup>-dibenzylbenzene-1,2-diamine (8c)**

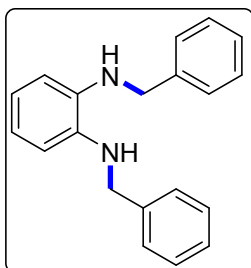

Light brown liquid. Yield: 31% and 53% respectively. <sup>1</sup>H NMR (200 MHz, CHLOROFORM-*d*) δ = 7.38 - 7.29 (m, 10H), 6.86 - 6.64 (m, 4H), 4.30 (s, 4H), 3.49 (s, br, 2H). <sup>13</sup>C NMR (50 MHz, CHLOROFORM-*d*) δ = 139.40, 137.12, 128.55, 128.21, 127.78, 127.20, 119.41, 112.00, 48.77.

***N*<sup>1</sup>,*N*<sup>2</sup>-bis(4-methylbenzyl)benzene-1,2-diamine (8d)**

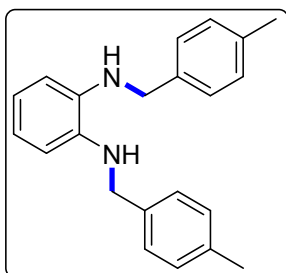

Light brown liquid. Yield: 25% and 48% respectively. <sup>1</sup>H NMR (200 MHz, CHLOROFORM-*d*) δ = 7.32 - 7.26 (m, 4H), 7.20 - 7.14 (m, 4H), 6.89 - 6.64 (m, 4H), 4.27 (s, 4H), 3.53 (s, br, 2H), 2.36 (s, 6H). <sup>13</sup>C NMR (50 MHz, CHLOROFORM-*d*) δ = 137.15, 136.81, 136.34, 129.22, 128.39, 127.79, 119.30, 111.84, 48.51, 21.06.

***N*<sup>1</sup>-benzylbenzene-1,3-diamine (9a)**

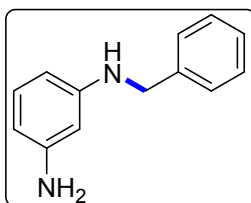

Light brown liquid. Yield: 25% and 29% respectively. <sup>1</sup>H NMR (200 MHz, CHLOROFORM-*d*) δ = 7.43 - 7.26 (m, 5H), 6.98 (t, *J* = 8Hz, 1H), 6.15 - 6.05 (m, 2H), 6.05-5.93 (m, 1H), 4.31 (s, 2H), 3.70 (s, br, 3H). <sup>13</sup>C NMR (50 MHz, CHLOROFORM-*d*) δ = 149.35, 147.50, 139.56, 130.08, 128.58, 127.46, 127.14, 105.05, 104.04, 99.45, 48.25.

***N*'-(4-methylbenzyl)benzene-1,3-diamine (9b)**

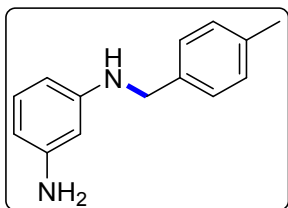

Light brown liquid. Yield: 10% and 15% respectively. **<sup>1</sup>H NMR** (200 MHz, CHLOROFORM-*d*)  $\delta$  = 7.29 - 7.20 (m, 2H), 7.20 - 7.08 (m, 2H), 6.95 (t, *J* = 8Hz, 1H), 6.13 - 6.02 (m, 2H), 5.02 - 6.92 (m, 1H), 4.23 (s, 2H), 3.46 (s, br, 3H), 2.33 (s, 3H). **<sup>13</sup>C NMR** (50 MHz, CHLOROFORM-*d*)  $\delta$  = 149.39, 147.45, 136.76, 136.45, 130.05, 129.23, 127.46, 105.00, 104.05, 99.46, 48.01, 21.05.

***N*'-benzylbenzene-1,2-diamine (9c)**

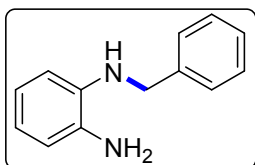

Light brown liquid. Yield: 43% and 13% respectively. **<sup>1</sup>H NMR** (500 MHz, CHLOROFORM-*d*)  $\delta$  = 7.47 - 7.28 (m, 5H), 6.87 - 6.79 (m, 1H), 6.79 - 6.66 (m, 3H), 4.34 (s, 2H), 3.38 (s, br, 3H). **<sup>13</sup>C NMR** (126 MHz, CHLOROFORM-*d*)  $\delta$  = 139.37, 137.70, 134.13, 128.59, 127.78, 127.25, 120.72, 118.79, 116.50, 111.94, 48.62.

***N*'-(4-methylbenzyl)benzene-1,2-diamine (9d)**

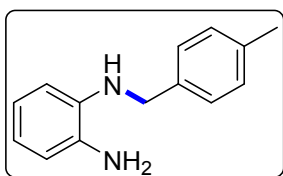

Light brown liquid. Yield: 38% and 12% respectively. **<sup>1</sup>H NMR** (200 MHz, CHLOROFORM-*d*)  $\delta$  = 7.33 - 7.20 (m, 2H), 7.19 - 7.10 (m, 2H), 6.84 - 6.75 (m, 1H), 6.74 - 6.63 (m, 3H), 4.25 (s, 2H), 3.38 (s, br, 3H), 2.34 (s, 3H). **<sup>13</sup>C NMR** (50 MHz, CHLOROFORM-*d*)  $\delta$  = 137.74, 136.84, 136.33, 134.12, 129.23, 127.75, 127.05, 120.67, 118.72, 116.44, 111.94, 77.63, 76.36, 48.36, 21.07.

## 2.5 Synthesis and characterization of dehydrogenative coupling product of various amines with alcohols

### 2.5.1 Synthesis of alkylated imine derivatives

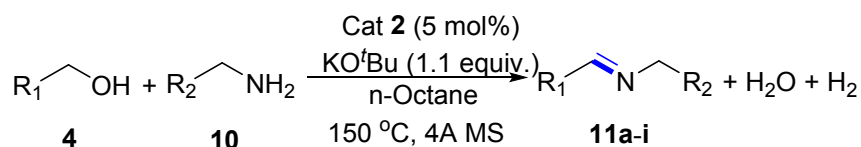

**Scheme S5.** Synthesis of dehydrogenative coupling product of various amines with alcohols

#### General procedure:

To an oven-dried 15 mL ace pressure tube, primary amine **10** (0.5 mmol), primary alcohol **4** (0.55 mmol), Co-complex **2** (5 mol%) and KO<sup>t</sup>Bu (1.1 equiv.) in n-octane (1 mL) were added under a gentle stream of argon. The mixture was of heated at 150 °C for 32 h with 4Å MS followed by cooling to room temperature. The reaction mixture was diluted with dichloromethane (5 mL) and the solvent was evaporated under reduced pressure. The crude mixture was purified by basic alumina (Al<sub>2</sub>O<sub>3</sub>) column chromatography (activity I-II according to Brockmann) using petroleum-ether/ethyl acetate as an eluting system.

### 2.5.2 Characterization alkylated imine derivatives

#### (*E*)-*N*-benzyl-1-phenylmethanimine (**11a**)

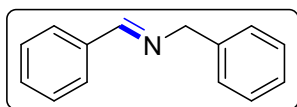

Light yellow liquid. Yield: 84%. <sup>1</sup>H NMR (200 MHz, CHLOROFORM-d) δ = 8.37 (s, 1H), 7.83 - 7.68 (m, 2H), 7.46 - 7.36 (m, 3H), 7.36 - 7.14 (m, 5H), 4.80 (s, 2H). <sup>13</sup>C NMR (50 MHz, CHLOROFORM-d) δ = 161.97, 139.25, 136.12, 130.74, 128.57, 128.46, 128.24, 127.94, 126.95, 65.02.

#### (*E*)-*N*-(4-methylbenzyl)-1-phenylmethanimine (**11b**)

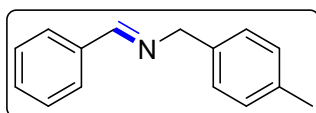



Light yellow liquid. Yield: 80%.  $^1\text{H NMR}$  (200 MHz, CHLOROFORM-d)  $\delta$  = 8.33 (s, 1H), 7.66 (d,  $J$  = 8Hz, 2H), 7.44 - 7.30 (m, 1H), 7.27 - 7.06 (m, 6H), 4.76 (s, 2H), 2.37 (s, 3H).  $^{13}\text{C NMR}$  (50 MHz, CHLOROFORM-d)  $\delta$  = 161.65, 140.92, 136.46, 136.31, 133.58, 129.26, 129.11, 128.53, 128.42, 128.20, 127.91, 64.76, 21.47.

**(E)-N-(4-fluorobenzyl)-1-phenylmethanimine (11c)**

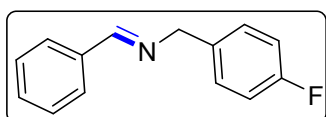

Light yellow liquid. Yield: 77%.  $^1\text{H NMR}$  (500 MHz, CHLOROFORM-d)  $\delta$  = 8.43 (s, 1H), 7.81 (d,  $J$  = 8Hz, 2H), 7.50 - 7.43 (m, 3H), 7.38 - 7.34 (m, 4H), 4.86 (s, 2H).  $^{13}\text{C NMR}$  (126 MHz, CHLOROFORM-d)  $\delta$  = 161.99, 139.28, 136.15, 130.75, 129.88, 128.59, 128.48, 128.26, 127.97, 126.97, 65.04.

**(E)-N-(3-chlorobenzyl)-1-phenylmethanimine (11d)**

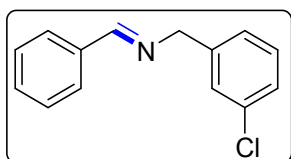

Light yellow liquid. Yield: 79%.  $^1\text{H NMR}$  (200 MHz, CHLOROFORM-d)  $\delta$  = 8.33 (t,  $J$  = 2Hz, 1H), 7.84 - 7.75 (m, 1H), 7.67 - 7.57 (m, 1H), 7.45 - 7.29 (m, 4H), 7.27 - 7.18 (m, 3H), 4.78 (s, 2H).  $^{13}\text{C NMR}$  (50 MHz, CHLOROFORM-d)  $\delta$  = 160.89, 141.00, 137.66, 134.84, 134.37, 130.88, 129.88, 129.76, 129.69, 128.63, 128.53, 128.30, 128.00, 127.94, 127.24, 127.09, 126.63, 126.01, 64.24.

**(E)-1-phenyl-N-(2-(trifluoromethyl)benzyl)methanimine (11e)**

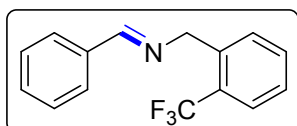

Light yellow liquid. Yield: 72%.  $^1\text{H NMR}$  (200 MHz, CHLOROFORM-d)  $\delta$  = 8.77 (s., 1H), 8.29 (d,  $J$  = 7Hz, 1H), 7.72 - 7.63 (m, 2H), 7.62 - 7.52 (m, 4H), 7.48 - 7.33 (m, 2H), 5.05 (s, 2H).  $^{13}\text{C NMR}$  (50 MHz, CHLOROFORM-d)  $\delta$  = 159.13, 132.01, 130.95, 130.32, 129.97, 129.74, 128.66, 128.39, 128.29, 127.18, 127.05, 126.79, 125.94, 125.82, 125.66, 125.54, 61.08.

**(E)-N-hexyl-1-phenylmethanimine (11f)**

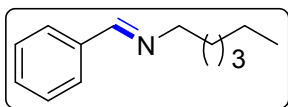

Light yellow liquid. Yield: 73%.  $^1\text{H NMR}$  (200 MHz, CHLOROFORM-d)  $\delta$  = 8.32 - 8.22 (m, 1H), 7.74 (dt,  $J$  = 4, 3Hz, 2H), 7.51 - 7.33 (m, 3H), 3.69 - 3.53 (m, 2H), 1.79 - 1.64 (m, 2H), 1.42 - 1.26 (m, 6H), 0.95 - 0.85 (m, 3H).  $^{13}\text{C NMR}$  (50 MHz, CHLOROFORM-d)  $\delta$  = 160.69, 136.34, 130.39, 128.53, 127.98, 77.63, 76.36, 61.81, 31.65, 30.87, 27.02, 22.60, 14.05.

**(E)-N-benzyl-1-(4-chlorophenyl)methanimine (11g)**

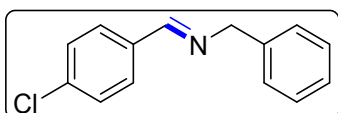

Light yellow liquid. Yield: 82%.  $^1\text{H NMR}$  (200 MHz, CHLOROFORM-d)  $\delta$  = 8.39 (d,  $J$  = 10Hz, 1H), 7.84 - 7.69 (m, 2H), 7.47 - 7.41 (m, 2H), 7.39 - 7.28 (m, 6H), 4.84 (s, 2H).

**(E)-N-benzyl-1-(p-tolyl)methanimine (11h)**

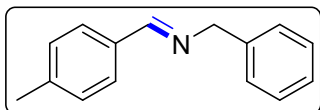

Light yellow liquid. Yield: 75%.  $^1\text{H NMR}$  (200 MHz, CHLOROFORM-d)  $\delta$  = 8.40 - 8.35 (m, 1H), 7.80 - 7.76 (m, 1H), 7.69 - 7.65 (m, 1H), 7.43 - 7.39 (m, 2H), 7.37 - 7.31 (m, 3H), 7.24 - 7.16 (m, 2H), 4.85 - 4.79 (m, 2H), 2.37 - 2.33 (m, 3H).  $^{13}\text{C NMR}$  (50 MHz, CHLOROFORM-d)  $\delta$  = 161.95, 161.90, 161.70, 139.24, 136.15, 130.72, 130.65, 129.28, 129.13, 128.55, 128.45, 128.23, 127.93, 126.94, 126.88, 64.99, 64.77, 21.47, 21.07.

### 3. Mechanistic studies

#### 3.1.1 Hydrogen gas detection

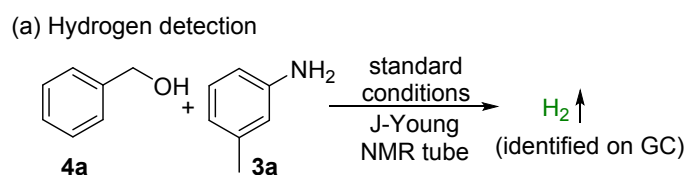

**Procedure:** we have performed our standard reaction in a J-Young NMR tube under the optimal reaction conditions. After 4 hrs of reaction, we have analyzed the gas phase of reaction using gas chromatography and molecular hydrogen was identified.

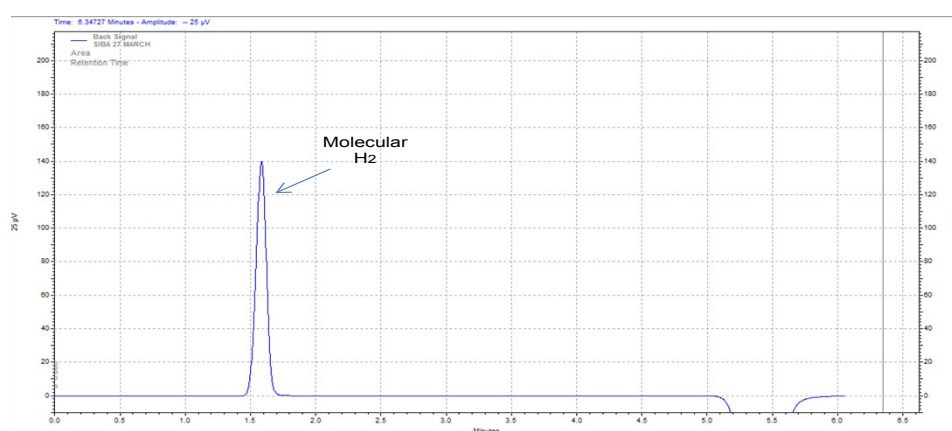

**Figure S7.** Gas phase GC for the identification of molecular hydrogen.

#### 3.1.2 Deuterium labeling experiment

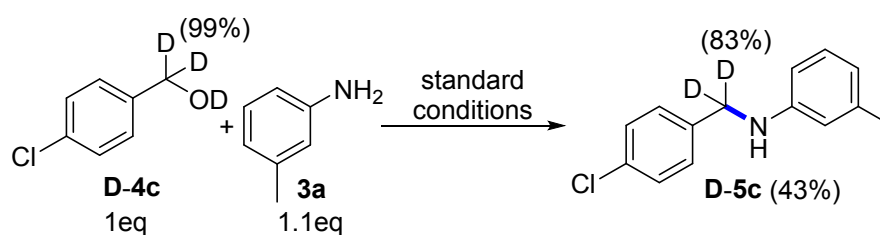

**Procedure:** To a 15 mL clean, oven-dried screw cap reaction tube, **D-4c** (0.275 mmol) and **3a** (0.25 mmol) was added under argon atmosphere. Then the reaction was performed under standard condition for 4 h at reduced temperature of 90 °C. After cooling to room temperature, the product was extracted with EtOAc (3 x 10 mL) and the combined organic layer was dried over anhydrous  $\text{Na}_2\text{SO}_4$  and concentrated under vacuum. Then the crude

product was purified through silica gel column chromatography (230-400 mesh size) by using petroleum-ether/ethyl acetate as an eluting system and yielded 43% of deuterated alkylated amine product (**D-5c**), supporting borrowing hydrogenative alkylation process.

### 3-methyl-*N*-(phenylmethyl-*d*<sub>2</sub>)aniline (**D-5c**)

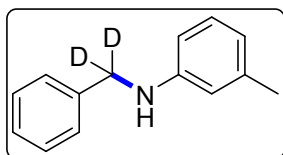

Colorless liquid. Yield 43%. <sup>1</sup>H NMR (500 MHz, CDCl<sub>3</sub>) δ 7.45 - 7.36 (m, 1H), 7.36 - 7.30 (m, 3H), 7.15 - 7.04 (m, 1H), 6.60 (d, *J* = 8Hz, 1H), 6.55 - 6.40 (m, 2H), 4.32 (s, 0.34H), 4.02 (s, br, 1H), 2.31 (s, 3H). <sup>13</sup>C NMR (126 MHz, CDCl<sub>3</sub>) δ 147.90, 139.08, 139.02, 138.08, 138.02, 132.84, 130.87, 129.45, 129.16, 128.70, 128.60, 128.48, 127.53, 127.19, 118.75, 118.53, 113.69, 113.64, 109.99, 47.32 (very less intense), 21.59.

#### 3.1.3 Reversibility test: alcohol to aldehyde step

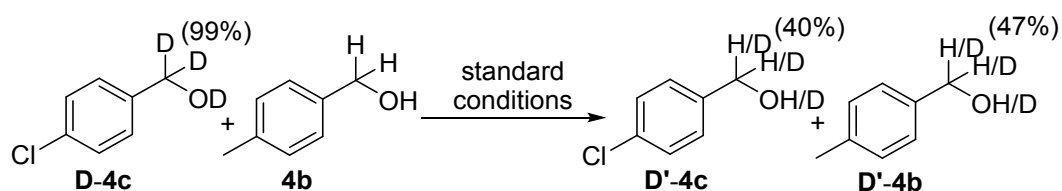

To a 15 mL clean, oven-dried screw cap reaction tube, **D-4c** (0.2 mmol, 99%-D) and **4b** (0.2 mmol) was added under argon atmosphere. Then the reaction was performed under standard condition for 24 h. The yield of the product **D'-4c** and **D'-4b** calculated by isolation. The percentage of deuterium incorporation in the product was calculated by <sup>1</sup>H NMR analysis.

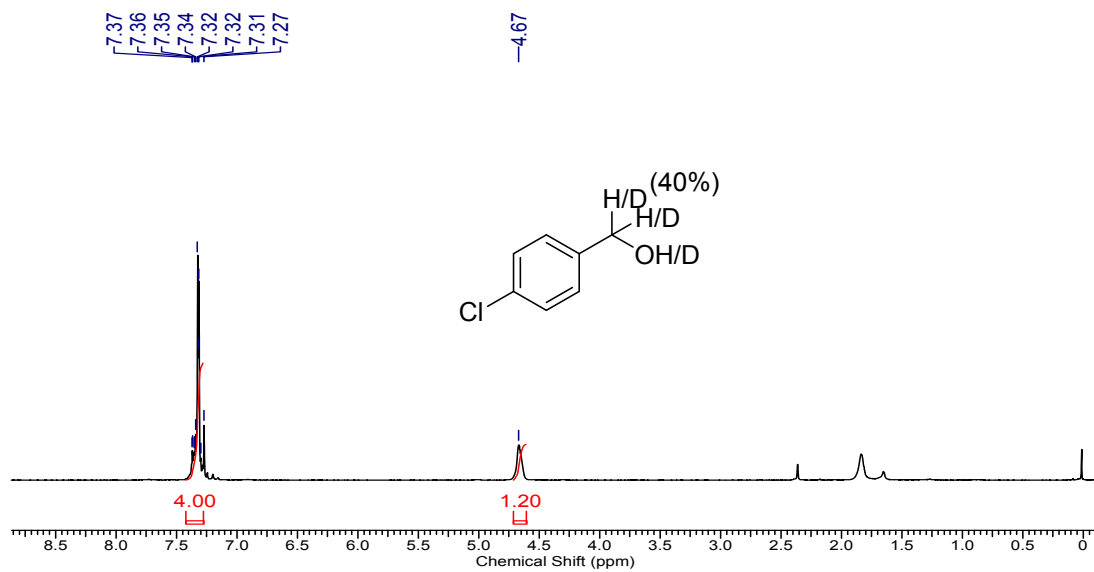

Figure S8. <sup>1</sup>H of D'-4c

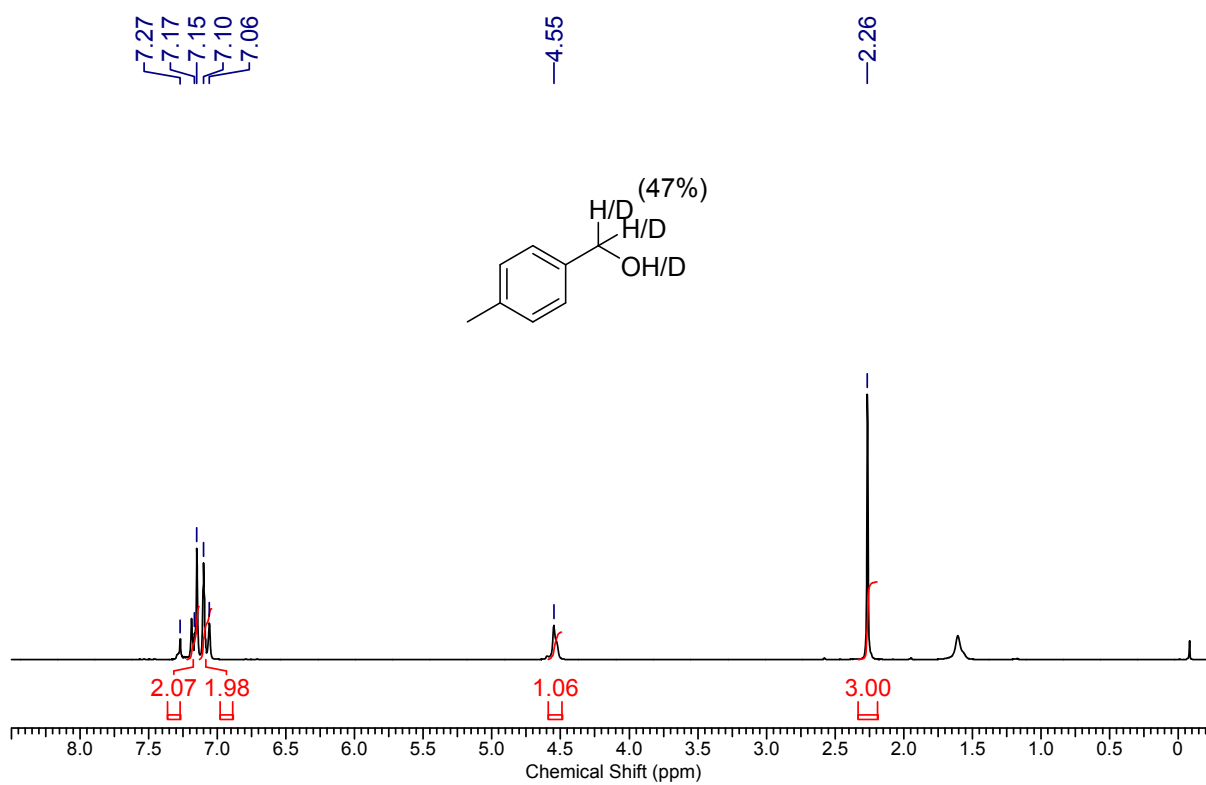

Figure S9. <sup>1</sup>H of D'-4b

## 5. X-ray Crystal Structure Determination of 1 and 3

### Crystallographic data

#### Crystal structure determination of 1 (CCDC 1557308)

#### CoMorCl

**Table S6 Crystal data and structure refinement for CoMorCl**

|                                             |                                                                                 |
|---------------------------------------------|---------------------------------------------------------------------------------|
| Identification code                         | CoMorCl                                                                         |
| Empirical formula                           | C <sub>15</sub> H <sub>23</sub> Cl <sub>2</sub> CoN <sub>3</sub> O <sub>2</sub> |
| Formula weight                              | 407.19                                                                          |
| Temperature/K                               | 473(2)                                                                          |
| Crystal system                              | monoclinic                                                                      |
| Space group                                 | P2 <sub>1</sub> /n                                                              |
| a/Å                                         | 10.2125(9)                                                                      |
| b/Å                                         | 13.9736(12)                                                                     |
| c/Å                                         | 12.5470(10)                                                                     |
| α/°                                         | 90                                                                              |
| β/°                                         | 92.0530(10)                                                                     |
| γ/°                                         | 90                                                                              |
| Volume/Å <sup>3</sup>                       | 1789.4(3)                                                                       |
| Z                                           | 4                                                                               |
| ρ <sub>calc</sub> /mg/mm <sup>3</sup>       | 1.511                                                                           |
| m/mm <sup>-1</sup>                          | 1.269                                                                           |
| F(000)                                      | 844                                                                             |
| Crystal size/mm <sup>3</sup>                | 0.420 × 0.320 × 0.270                                                           |
| Theta range for data collection             | 4.364 to 49.986°                                                                |
| Index ranges                                | -12 ≤ h ≤ 12, -16 ≤ k ≤ 16, -14 ≤ l ≤ 14                                        |
| Reflections collected                       | 16414                                                                           |
| Independent reflections                     | 3151 [R(int) = 0.0336]                                                          |
| Data/restraints/parameters                  | 3151/0/208                                                                      |
| Goodness-of-fit on F <sup>2</sup>           | 1.063                                                                           |
| Final R indexes [I > 2σ (I)]                | R <sub>1</sub> = 0.0297, wR <sub>2</sub> = 0.0623                               |
| Final R indexes [all data]                  | R <sub>1</sub> = 0.0355, wR <sub>2</sub> = 0.0648                               |
| Largest diff. peak/hole / e Å <sup>-3</sup> | 0.230/-0.317                                                                    |

**Table S7 Fractional Atomic Coordinates (×10<sup>4</sup>) and Equivalent Isotropic Displacement Parameters (Å<sup>2</sup>×10<sup>3</sup>) for CoMorCl. U<sub>eq</sub> is defined as 1/3 of the trace of the orthogonalised U<sub>ij</sub> tensor.**

| Atom | x          | y          | Z           | U(eq)      |
|------|------------|------------|-------------|------------|
| Co1  | 9108.2 (3) | 7924.2 (2) | 9059.7 (2)  | 22.22 (10) |
| Cl1  | 9319.0 (5) | 8055.7 (4) | 10852.0 (4) | 29.14 (14) |

|     |              |              |              |            |
|-----|--------------|--------------|--------------|------------|
| Cl2 | 7912.8 (6)   | 6643.1 (4)   | 8509.1 (5)   | 36.80 (16) |
| O1  | 4983.5 (15)  | 8895.2 (12)  | 9164.2 (13)  | 33.0 (4)   |
| O2  | 12656.8 (15) | 6282.8 (12)  | 10436.1 (13) | 34.2 (4)   |
| N1  | 9946.3 (16)  | 8660.9 (12)  | 7871.4 (14)  | 22.0 (4)   |
| N2  | 7724.5 (16)  | 9229.8 (12)  | 8814.7 (14)  | 21.2 (4)   |
| N3  | 11140.8 (16) | 7077.9 (12)  | 8671.5 (14)  | 21.8 (4)   |
| C1  | 9576 (2)     | 9568.0 (15)  | 7688.0 (18)  | 24.1 (5)   |
| C2  | 10023 (2)    | 10071.6 (17) | 6826.5 (19)  | 31.0 (5)   |
| C3  | 10869 (2)    | 9623.1 (18)  | 6153.2 (19)  | 33.2 (6)   |
| C4  | 11267 (2)    | 8693.1 (17)  | 6350.1 (18)  | 29.3 (5)   |
| C5  | 10778 (2)    | 8224.9 (16)  | 7221.9 (17)  | 24.3 (5)   |
| C6  | 8685 (2)     | 9962.2 (15)  | 8499.0 (19)  | 27.2 (5)   |
| C7  | 7052 (2)     | 9586.1 (16)  | 9762.9 (18)  | 26.1 (5)   |
| C8  | 5934 (2)     | 8938.5 (17)  | 10014.5 (19) | 31.6 (6)   |
| C9  | 5584 (2)     | 8510.5 (17)  | 8248.8 (19)  | 31.4 (5)   |
| C10 | 6729 (2)     | 9116.4 (17)  | 7927.7 (17)  | 26.5 (5)   |
| C11 | 11060 (2)    | 7201.8 (16)  | 7506.3 (17)  | 25.8 (5)   |
| C12 | 12380 (2)    | 7515.0 (17)  | 9088.5 (19)  | 29.2 (5)   |
| C13 | 12628 (2)    | 7290.9 (17)  | 10258.2 (19) | 32.5 (6)   |
| C14 | 11433 (2)    | 5873.3 (17)  | 10083.2 (19) | 32.7 (6)   |
| C15 | 11174 (2)    | 6042.8 (15)  | 8910.4 (18)  | 28.1 (5)   |

**Table S8 Anisotropic Displacement Parameters ( $\text{\AA}^2 \times 10^3$ ) for CoMorCl. The Anisotropic displacement factor exponent takes the form:  $-2\pi^2[h^2a^{*2}U_{11}+\dots+2hka \times b \times U_{12}]$**

| Atom | $U_{11}$   | $U_{22}$   | $U_{33}$   | $U_{23}$   | $U_{13}$  | $U_{12}$   |
|------|------------|------------|------------|------------|-----------|------------|
| Co1  | 28.87 (17) | 20.09 (16) | 17.86 (16) | -0.10 (12) | 2.97 (12) | -6.58 (12) |
| Cl1  | 31.1 (3)   | 36.5 (3)   | 19.8 (3)   | -1.3 (2)   | 1.6 (2)   | 3.7 (2)    |
| Cl2  | 30.2 (3)   | 22.9 (3)   | 56.8 (4)   | -10.0 (3)  | -5.8 (3)  | -3.4 (2)   |
| O1   | 23.9 (8)   | 39.3 (10)  | 36.2 (10)  | -1.3 (8)   | 8.5 (7)   | 3.1 (7)    |
| O2   | 31.6 (9)   | 39.1 (10)  | 31.8 (10)  | 7.2 (8)    | 0.6 (7)   | 9.2 (7)    |
| N1   | 20.6 (9)   | 23.2 (10)  | 22.1 (10)  | 1.9 (8)    | 1.6 (7)   | -0.5 (7)   |
| N2   | 22.6 (9)   | 21.2 (9)   | 19.9 (10)  | 0.0 (8)    | 2.6 (7)   | -0.2 (7)   |
| N3   | 23.5 (9)   | 21.8 (9)   | 20.3 (10)  | 1.0 (8)    | 1.7 (7)   | 0.7 (7)    |
| C1   | 18.6 (11)  | 24.2 (12)  | 29.1 (13)  | 5.7 (10)   | -3.1 (9)  | -3.7 (9)   |
| C2   | 25.0 (12)  | 29.5 (13)  | 38.4 (14)  | 11.7 (11)  | -1.7 (10) | -5 (1)     |
| C3   | 26.5 (12)  | 45.9 (15)  | 27.1 (13)  | 15.8 (11)  | -2.2 (10) | -13.0 (11) |
| C4   | 25.4 (12)  | 38.6 (14)  | 24.2 (13)  | 1.0 (11)   | 4.4 (10)  | -4.6 (10)  |
| C5   | 21.8 (11)  | 31.3 (12)  | 19.6 (12)  | 0.6 (10)   | 0.6 (9)   | -2.4 (9)   |
| C6   | 28.1 (12)  | 18.8 (11)  | 34.7 (14)  | 4.2 (10)   | 0.9 (10)  | -0.2 (9)   |
| C7   | 29.2 (12)  | 24.9 (12)  | 24.4 (12)  | -2.7 (10)  | 2.9 (10)  | 8.1 (10)   |
| C8   | 34.9 (13)  | 34.7 (14)  | 25.8 (13)  | 3.2 (11)   | 9.9 (10)  | 8.6 (11)   |
| C9   | 24.3 (12)  | 34.8 (14)  | 35.1 (14)  | -6.5 (11)  | 1.3 (10)  | -0.9 (10)  |
| C10  | 26.3 (12)  | 32.1 (13)  | 21.0 (12)  | 1.2 (10)   | -0.4 (9)  | 2.7 (10)   |
| C11  | 27.2 (12)  | 29.6 (13)  | 20.8 (12)  | -2.4 (10)  | 4.9 (9)   | 2.2 (10)   |
| C12  | 26.1 (12)  | 30.9 (13)  | 30.8 (13)  | 3.9 (11)   | 0.7 (10)  | -2.3 (10)  |
| C13  | 27.9 (12)  | 38.1 (14)  | 31.2 (14)  | 0.8 (11)   | -2.8 (10) | 1.4 (10)   |

|     |           |           |           |          |          |          |
|-----|-----------|-----------|-----------|----------|----------|----------|
| C14 | 31.9 (13) | 31.3 (13) | 35.4 (14) | 6.5 (11) | 6.0 (11) | 4.7 (10) |
| C15 | 30.2 (12) | 22.2 (12) | 32.2 (13) | 0.1 (10) | 4.6 (10) | 4 (1)    |

**Table S9 Bond Lengths for CoMorCl.**

| Atom | Atom | Length/Å    | Atom | Atom | Length/Å  |
|------|------|-------------|------|------|-----------|
| Co1  | Cl1  | 2.2589 (6)  | N3   | C11  | 1.472 (3) |
| Co1  | Cl2  | 2.2609 (6)  | N3   | C12  | 1.484 (3) |
| Co1  | N1   | 2.0265 (18) | N3   | C15  | 1.477 (3) |
| Co1  | N2   | 2.3215 (17) | C1   | C2   | 1.381 (3) |
| Co1  | N3   | 2.4530 (17) | C1   | C6   | 1.495 (3) |
| O1   | C8   | 1.418 (3)   | C2   | C3   | 1.380 (3) |
| O1   | C9   | 1.426 (3)   | C3   | C4   | 1.381 (3) |
| O2   | C13  | 1.426 (3)   | C4   | C5   | 1.383 (3) |
| O2   | C14  | 1.431 (3)   | C5   | C11  | 1.499 (3) |
| N1   | C1   | 1.340 (3)   | C7   | C8   | 1.500 (3) |
| N1   | C5   | 1.344 (3)   | C9   | C10  | 1.510 (3) |
| N2   | C6   | 1.481 (3)   | C12  | C13  | 1.513 (3) |
| N2   | C7   | 1.481 (3)   | C14  | C15  | 1.505 (3) |
| N2   | C10  | 1.489 (3)   |      |      |           |

**Table S10 Bond Angles for CoMorCl.**

| Atom | Atom | Atom | Angle/°     | Atom | Atom | Atom | Angle/°     |
|------|------|------|-------------|------|------|------|-------------|
| Cl1  | Co1  | Cl2  | 113.56 (3)  | C11  | N3   | C15  | 108.47 (17) |
| Cl1  | Co1  | N2   | 95.95 (5)   | C12  | N3   | Co1  | 116.66 (13) |
| Cl1  | Co1  | N3   | 100.71 (4)  | C15  | N3   | Co1  | 116.41 (13) |
| Cl2  | Co1  | N2   | 105.21 (5)  | C15  | N3   | C12  | 108.59 (17) |
| Cl2  | Co1  | N3   | 90.52 (4)   | N1   | C1   | C2   | 121.1 (2)   |
| N1   | Co1  | Cl1  | 131.56 (5)  | N1   | C1   | C6   | 113.99 (18) |
| N1   | Co1  | Cl2  | 114.52 (5)  | C2   | C1   | C6   | 124.9 (2)   |
| N1   | Co1  | N2   | 76.97 (6)   | C3   | C2   | C1   | 118.7 (2)   |
| N1   | Co1  | N3   | 73.51 (6)   | C2   | C3   | C4   | 120.3 (2)   |
| N2   | Co1  | N3   | 150.23 (6)  | C3   | C4   | C5   | 118.3 (2)   |
| C8   | O1   | C9   | 108.63 (16) | N1   | C5   | C4   | 121.3 (2)   |
| C13  | O2   | C14  | 109.51 (17) | N1   | C5   | C11  | 114.10 (18) |
| C1   | N1   | Co1  | 118.87 (14) | C4   | C5   | C11  | 124.6 (2)   |
| C1   | N1   | C5   | 120.34 (19) | N2   | C6   | C1   | 110.65 (17) |
| C5   | N1   | Co1  | 120.57 (14) | N2   | C7   | C8   | 110.16 (18) |
| C6   | N2   | Co1  | 99.95 (12)  | O1   | C8   | C7   | 111.93 (19) |
| C6   | N2   | C10  | 108.33 (17) | O1   | C9   | C10  | 111.28 (19) |
| C7   | N2   | Co1  | 117.08 (13) | N2   | C10  | C9   | 112.01 (18) |
| C7   | N2   | C6   | 108.24 (16) | N3   | C11  | C5   | 110.62 (17) |
| C7   | N2   | C10  | 108.22 (16) | N3   | C12  | C13  | 111.59 (18) |
| C10  | N2   | Co1  | 114.30 (13) | O2   | C13  | C12  | 110.97 (19) |
| C11  | N3   | Co1  | 97.05 (12)  | O2   | C14  | C15  | 111.15 (19) |
| C11  | N3   | C12  | 108.58 (17) | N3   | C15  | C14  | 110.76 (18) |

**Table S11 Torsion Angles for CoMorCl.**

| A | B | C | D | Angle/° |
|---|---|---|---|---------|
|---|---|---|---|---------|



|     |     |     |     |              |
|-----|-----|-----|-----|--------------|
| Co1 | N1  | C1  | C2  | -173.82 (16) |
| Co1 | N1  | C1  | C6  | 7.3 (2)      |
| Co1 | N1  | C5  | C4  | 174.16 (16)  |
| Co1 | N1  | C5  | C11 | -3.4 (2)     |
| Co1 | N2  | C6  | C1  | 45.75 (18)   |
| Co1 | N2  | C7  | C8  | -76.56 (19)  |
| Co1 | N2  | C10 | C9  | 79.31 (19)   |
| Co1 | N3  | C11 | C5  | 48.73 (17)   |
| Co1 | N3  | C12 | C13 | 80.0 (2)     |
| Co1 | N3  | C15 | C14 | -79.29 (19)  |
| O1  | C9  | C10 | N2  | 56.5 (2)     |
| O2  | C14 | C15 | N3  | -59.4 (2)    |
| N1  | C1  | C2  | C3  | -0.2 (3)     |
| N1  | C1  | C6  | N2  | -39.7 (3)    |
| N1  | C5  | C11 | N3  | -37.4 (3)    |
| N2  | C7  | C8  | O1  | -60.9 (2)    |
| N3  | C12 | C13 | O2  | 57.2 (2)     |
| C1  | N1  | C5  | C4  | -0.3 (3)     |
| C1  | N1  | C5  | C11 | -177.85 (19) |
| C1  | C2  | C3  | C4  | -0.7 (3)     |
| C2  | C1  | C6  | N2  | 141.5 (2)    |
| C2  | C3  | C4  | C5  | 1.1 (3)      |
| C3  | C4  | C5  | N1  | -0.6 (3)     |
| C3  | C4  | C5  | C11 | 176.6 (2)    |
| C4  | C5  | C11 | N3  | 145.2 (2)    |
| C5  | N1  | C1  | C2  | 0.8 (3)      |
| C5  | N1  | C1  | C6  | -178.10 (19) |
| C6  | N2  | C7  | C8  | 171.56 (18)  |
| C6  | N2  | C10 | C9  | -170.24 (18) |
| C6  | C1  | C2  | C3  | 178.5 (2)    |
| C7  | N2  | C6  | C1  | 168.73 (17)  |
| C7  | N2  | C10 | C9  | -53.1 (2)    |
| C8  | O1  | C9  | C10 | -59.0 (2)    |
| C9  | O1  | C8  | C7  | 61.9 (2)     |
| C10 | N2  | C6  | C1  | -74.1 (2)    |
| C10 | N2  | C7  | C8  | 54.4 (2)     |
| C11 | N3  | C12 | C13 | -171.72 (18) |
| C11 | N3  | C15 | C14 | 172.62 (18)  |
| C12 | N3  | C11 | C5  | -72.5 (2)    |
| C12 | N3  | C15 | C14 | 54.8 (2)     |
| C13 | O2  | C14 | C15 | 60.7 (2)     |
| C14 | O2  | C13 | C12 | -59.2 (2)    |
| C15 | N3  | C11 | C5  | 169.66 (17)  |
| C15 | N3  | C12 | C13 | -54.0 (2)    |

**Table S12 Hydrogen Atom Coordinates ( $\text{\AA} \times 10^4$ ) and Isotropic Displacement Parameters**

**(Å<sup>2</sup>×10<sup>3</sup>) for CoMorCl.**

| <b>Atom</b> | <b>x</b> | <b>y</b> | <b>Z</b> | <b>U(eq)</b> |
|-------------|----------|----------|----------|--------------|
| H2          | 9754     | 10714    | 6700     | 37           |
| H3          | 11179    | 9955     | 5552     | 40           |
| H4          | 11861    | 8383     | 5898     | 35           |
| H6A         | 9208     | 10173    | 9135     | 33           |
| H6B         | 8214     | 10526    | 8199     | 33           |
| H7A         | 6720     | 10241    | 9624     | 31           |
| H7B         | 7682     | 9613     | 10381    | 31           |
| H8A         | 6275     | 8287     | 10163    | 38           |
| H8B         | 5515     | 9172     | 10664    | 38           |
| H9A         | 4929     | 8477     | 7649     | 38           |
| H9B         | 5891     | 7852     | 8406     | 38           |
| H10A        | 7145     | 8816     | 7311     | 32           |
| H10B        | 6406     | 9756     | 7702     | 32           |
| H11A        | 10358    | 6787     | 7197     | 31           |
| H11B        | 11899    | 7005     | 7200     | 31           |
| H12A        | 12337    | 8217     | 8991     | 35           |
| H12B        | 13119    | 7271     | 8677     | 35           |
| H13A        | 13476    | 7574     | 10503    | 39           |
| H13B        | 11929    | 7582     | 10679    | 39           |
| H14A        | 10717    | 6160     | 10489    | 39           |
| H14B        | 11445    | 5177     | 10226    | 39           |
| H15A        | 11869    | 5734     | 8502     | 34           |
| H15B        | 10325    | 5750     | 8687     | 34           |

**Experimental**

A suitable crystal of C<sub>15</sub>H<sub>23</sub>Cl<sub>2</sub>CoN<sub>3</sub>O<sub>2</sub> [CoMorCl] was selected and mounted on a diffractometer. The crystal was kept at 473(2) K. Using Olex2 [1], the structure was solved with the XS [2] structure solution program using Direct Methods and refined with the XL [3] refinement package using Least Squares minimisation.

[1] O. V. Dolomanov, L. J. Bourhis, R. J. Gildea, J. A. K. Howard and H. Puschmann, OLEX2: a complete structure solution, refinement and analysis program. *J. Appl. Cryst.* (2009). 42, 339-341.

[2] SHELXS-97 (Sheldrick, 2008)

[3] XL, G.M. Sheldrick, *Acta Cryst.* (2008). A64, 112-122.

**Crystal structure determination of [CoMorCl]**

**Crystal Data.**  $C_{15}H_{23}Cl_2CoN_3O_2$ ,  $M=407.19$ , monoclinic,  $a = 10.2125(9) \text{ \AA}$ ,  $b = 13.9736(12) \text{ \AA}$ ,  $c = 12.5470(10) \text{ \AA}$ ,  $\beta = 92.0530(10)$ ,  $U = 1789.4(3) \text{ \AA}^3$ ,  $T = 473(2)$ , space group  $P2_1/n$  (no. 14),  $Z = 4$ ,  $\mu(\text{MoK}\alpha) = 1.269$ , 16414 reflections measured, 3151 unique ( $R_{\text{int}} = 0.0336$ ) which were used in all calculations. The final  $wR(F_2)$  was 0.0648 (all data).

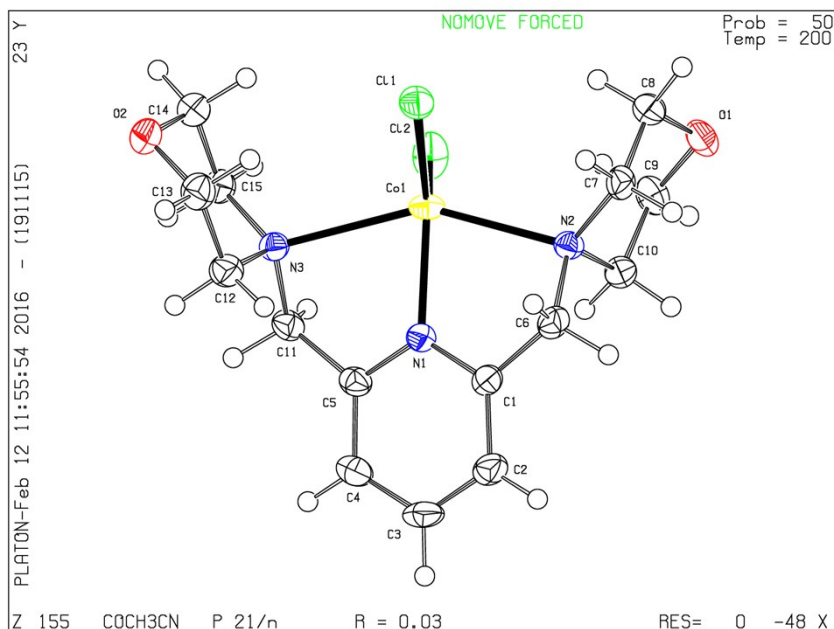

### Crystal structure determination of 3 (CCDC 1836378)

#### NNNCoBF<sub>4</sub>

**Table S13 Crystal data and structure refinement for NNNCoBF<sub>4</sub>**

|                        |                                |
|------------------------|--------------------------------|
| Identification code    | NNNCoBF <sub>4</sub>           |
| Empirical formula      | $C_{15}H_{29}B_2Cl_2CoF_8N_5O$ |
| Formula weight         | 598.88                         |
| Temperature/K          | 373(2)                         |
| Crystal system         | Triclinic                      |
| Space group            | P-1                            |
| $a/\text{\AA}$         | 6.8380(14)                     |
| $b/\text{\AA}$         | 13.077(3)                      |
| $c/\text{\AA}$         | 13.377(3)                      |
| $\alpha/^\circ$        | 89.44(3)                       |
| $\beta/^\circ$         | 78.44(3)                       |
| $\gamma/^\circ$        | 82.78(3)                       |
| Volume/ $\text{\AA}^3$ | 1162.5(4)                      |
| Z                      | 2                              |

|                                                |                                                            |
|------------------------------------------------|------------------------------------------------------------|
| $\rho_{\text{calc}}/\text{mg}/\text{mm}^3$     | 1.711                                                      |
| $\text{m}/\text{mm}^{-1}$                      | 0.752                                                      |
| F(000)                                         | 610                                                        |
| Crystal size/ $\text{mm}^3$                    | $0.121 \times 0.105 \times 0.055$                          |
| Theta range for data collection                | 2.754 to 51.998°                                           |
| Index ranges                                   | $-9 \leq h \leq 9, -18 \leq k \leq 18, -18 \leq l \leq 18$ |
| Reflections collected                          | 11996                                                      |
| Independent reflections                        | 6106[R(int) = 0.0298]                                      |
| Data/restraints/parameters                     | 6106/3/313                                                 |
| Goodness-of-fit on $F^2$                       | 0.970                                                      |
| Final R indexes [ $I > 2\sigma(I)$ ]           | $R_1 = 0.0460, wR_2 = 0.1219$                              |
| Final R indexes [all data]                     | $R_1 = 0.0660, wR_2 = 0.1304$                              |
| Largest diff. peak/hole / $e \text{ \AA}^{-3}$ | 0.568/-1.159                                               |

**Table S14 Fractional Atomic Coordinates ( $\times 10^4$ ) and Equivalent Isotropic Displacement Parameters ( $\text{\AA}^2 \times 10^3$ ) for  $\text{NNCoBF}_4$ .  $U_{\text{eq}}$  is defined as 1/3 of the trace of the orthogonalised  $U_{ij}$  tensor.**

| Atom | x          | y           | Z           | U(eq)      |
|------|------------|-------------|-------------|------------|
| Co1  | 2667.1 (5) | 5840.2 (3)  | 8083.1 (3)  | 15.09 (10) |
| Cl1  | -321.0 (9) | 5874.6 (5)  | 7593.4 (5)  | 22.40 (15) |
| Cl2  | 2512.9 (9) | 6443.4 (5)  | 9699.2 (5)  | 19.08 (14) |
| N1   | 5015 (3)   | 5340.1 (16) | 6966.8 (16) | 15.4 (4)   |
| N2   | 3223 (3)   | 4117.0 (16) | 8440.6 (16) | 16.5 (4)   |
| N3   | 1650 (3)   | 2249.4 (17) | 9327.0 (17) | 20.8 (4)   |
| N4   | 3536 (3)   | 7325.5 (16) | 7310.1 (16) | 16.4 (4)   |
| N5   | 4030 (4)   | 9498.8 (18) | 7550.2 (19) | 25.1 (5)   |
| C1   | 5933 (3)   | 4372 (2)    | 6988 (2)    | 18.5 (5)   |
| C2   | 7342 (4)   | 3955 (2)    | 6151 (2)    | 22.8 (6)   |
| C3   | 7825 (4)   | 4565 (2)    | 5315 (2)    | 23.8 (6)   |
| C4   | 6923 (4)   | 5577 (2)    | 5321 (2)    | 22.4 (5)   |
| C5   | 5482 (4)   | 5945 (2)    | 6162 (2)    | 19.5 (5)   |
| C6   | 5394 (4)   | 3833 (2)    | 7983 (2)    | 21.0 (5)   |
| C7   | 1923 (4)   | 3524 (2)    | 7956 (2)    | 19.2 (5)   |
| C8   | 2110 (4)   | 2384 (2)    | 8196 (2)    | 23.3 (5)   |
| C9   | 2953 (4)   | 2807 (2)    | 9845 (2)    | 22.2 (5)   |
| C10  | 2766 (4)   | 3932 (2)    | 9555.4 (19) | 18.3 (5)   |
| C11  | 4272 (4)   | 7006 (2)    | 6236 (2)    | 21.0 (5)   |
| C12  | 1828 (4)   | 8165 (2)    | 7445 (2)    | 21.2 (5)   |
| C13  | 2415 (4)   | 9192 (2)    | 7047 (2)    | 26.3 (6)   |
| C14  | 5806 (4)   | 8687 (2)    | 7390 (2)    | 23.4 (5)   |
| C15  | 5151 (4)   | 7668 (2)    | 7776 (2)    | 19.1 (5)   |
| B1   | 7648 (5)   | 409 (3)     | 9298 (2)    | 24.7 (6)   |
| F1   | 9459 (3)   | 736.4 (18)  | 8828.4 (16) | 50.3 (6)   |
| F2   | 7908 (3)   | -666.7 (13) | 9289.8 (14) | 32.7 (4)   |

|     |          |             |              |           |
|-----|----------|-------------|--------------|-----------|
| F3  | 6121 (3) | 755.8 (15)  | 8781.1 (15)  | 42.9 (5)  |
| F4  | 7140 (3) | 783.6 (16)  | 10296.7 (14) | 42.2 (5)  |
| B2  | 1094 (5) | 1539 (3)    | 5416 (2)     | 25.5 (6)  |
| F5  | 1584 (4) | 2369.8 (19) | 5920 (2)     | 68.7 (8)  |
| F6  | 2880 (3) | 883.0 (16)  | 5095.9 (14)  | 38.7 (5)  |
| F7  | 293 (4)  | 1917 (2)    | 4620.0 (16)  | 61.9 (7)  |
| F8  | -234 (3) | 1080 (2)    | 6117 (2)     | 77.5 (10) |
| O1W | 5589 (3) | 1138.5 (18) | 6453.9 (17)  | 30.6 (5)  |

**Table S15 Anisotropic Displacement Parameters ( $\text{\AA}^2 \times 10^3$ ) for NNNCoBF<sub>4</sub>. The Anisotropic displacement factor exponent takes the form: -  $2\pi^2[h^2a^{*2}U_{11}+\dots+2hka \times b \times U_{12}]$**

| Atom | U <sub>11</sub> | U <sub>22</sub> | U <sub>33</sub> | U <sub>23</sub> | U <sub>13</sub> | U <sub>12</sub> |
|------|-----------------|-----------------|-----------------|-----------------|-----------------|-----------------|
| Co1  | 9.29 (15)       | 22.14 (18)      | 14.72 (18)      | -2.94 (12)      | -4.92 (12)      | -1.12 (12)      |
| Cl1  | 12.5 (3)        | 28.4 (3)        | 29.3 (4)        | -2.3 (3)        | -11.8 (2)       | -1.4 (2)        |
| Cl2  | 15.9 (3)        | 26.4 (3)        | 16.2 (3)        | -3.3 (2)        | -5.9 (2)        | -3.0 (2)        |
| N1   | 9.6 (8)         | 23.1 (10)       | 13.6 (10)       | -4.4 (8)        | -1.9 (8)        | -2.6 (7)        |
| N2   | 12.4 (9)        | 22 (1)          | 16.2 (11)       | -2.0 (8)        | -6.0 (8)        | -1.5 (8)        |
| N3   | 20.7 (10)       | 22.2 (11)       | 20.7 (12)       | 0.4 (8)         | -6.3 (9)        | -4.2 (8)        |
| N4   | 11.8 (9)        | 23.1 (11)       | 15.3 (10)       | -1.5 (8)        | -5.4 (8)        | -1.7 (8)        |
| N5   | 30.2 (12)       | 21.4 (11)       | 24.4 (13)       | -0.2 (9)        | -6.1 (10)       | -4.9 (9)        |
| C1   | 10.1 (10)       | 24.0 (12)       | 23.1 (13)       | -5.4 (10)       | -5.7 (10)       | -4.0 (9)        |
| C2   | 10.8 (10)       | 27.1 (14)       | 30.4 (15)       | -10.5 (11)      | -3.7 (10)       | -1.4 (9)        |
| C3   | 11.6 (10)       | 37.1 (15)       | 22.7 (14)       | -13.5 (11)      | 0.2 (10)        | -7.8 (10)       |
| C4   | 16.6 (11)       | 35.9 (15)       | 15.9 (13)       | -5 (1)          | -2.2 (10)       | -9.5 (11)       |
| C5   | 15.6 (11)       | 27.9 (13)       | 17.2 (13)       | -3.9 (10)       | -4.9 (10)       | -8.1 (10)       |
| C6   | 11.8 (10)       | 24.7 (13)       | 26.2 (14)       | -2.2 (10)       | -5 (1)          | 1.0 (9)         |
| C7   | 17.3 (11)       | 23.8 (12)       | 19.1 (13)       | -1.7 (10)       | -7.9 (10)       | -5.0 (9)        |
| C8   | 25.3 (13)       | 25.5 (13)       | 20.6 (14)       | -3.1 (10)       | -5.9 (11)       | -6.6 (10)       |
| C9   | 21.8 (12)       | 24.5 (13)       | 22.9 (14)       | -1.5 (10)       | -11.5 (11)      | -1.4 (10)       |
| C10  | 17.0 (11)       | 22.9 (12)       | 15.9 (12)       | -1.8 (9)        | -5.9 (10)       | -2.0 (9)        |
| C11  | 20.9 (12)       | 26.8 (13)       | 17.9 (13)       | 0.4 (10)        | -7.8 (10)       | -6.1 (10)       |
| C12  | 15.0 (11)       | 25.2 (13)       | 23.9 (14)       | 2.6 (10)        | -6.5 (10)       | -0.5 (9)        |
| C13  | 24.0 (13)       | 26.5 (14)       | 28.9 (16)       | 3.8 (11)        | -9.7 (12)       | 1.2 (11)        |
| C14  | 19.7 (12)       | 28.6 (14)       | 23.8 (14)       | -3.2 (11)       | -6.6 (11)       | -6.5 (10)       |
| C15  | 13.8 (10)       | 26.1 (13)       | 19.7 (13)       | -3 (1)          | -8 (1)          | -3.6 (9)        |
| B1   | 29.8 (15)       | 25.1 (15)       | 22.2 (16)       | -0.6 (12)       | -10.1 (13)      | -6.9 (12)       |
| F1   | 57.9 (13)       | 59.6 (14)       | 39.5 (12)       | 3.3 (10)        | -4.7 (10)       | -39.4 (12)      |
| F2   | 34.9 (9)        | 25.9 (9)        | 41.4 (11)       | -0.1 (7)        | -16.7 (8)       | -4.4 (7)        |
| F3   | 59.5 (13)       | 33.1 (10)       | 41.9 (11)       | -2.1 (8)        | -30.7 (10)      | 5.8 (9)         |
| F4   | 52.9 (12)       | 48.9 (12)       | 25.6 (10)       | -8.7 (8)        | -10.4 (9)       | -4.4 (10)       |
| B2   | 24.4 (14)       | 31.7 (16)       | 19.7 (16)       | 1.3 (12)        | -6.6 (13)       | 2.3 (12)        |
| F5   | 81.4 (19)       | 53.1 (15)       | 79.6 (18)       | -22.2 (13)      | -43.4 (15)      | 6.2 (13)        |
| F6   | 33.5 (10)       | 46.9 (12)       | 31.7 (11)       | -1.7 (8)        | -6.9 (8)        | 10.9 (8)        |
| F7   | 63.4 (15)       | 83.7 (18)       | 34.0 (12)       | -4.1 (11)       | -24.4 (11)      | 32.3 (13)       |
| F8   | 26.5 (11)       | 84 (2)          | 110 (2)         | 55.8 (18)       | 6.5 (13)        | -1.5 (12)       |

O1W 23.6(10) 39.1(12) 28.5(12) 0.8(9) -3.6(9) -4.0(9)

**Table S16 Bond Lengths for NNNCoBF<sub>4</sub>.**

| Atom | Atom | Length/Å  | Atom | Atom | Length/Å |
|------|------|-----------|------|------|----------|
| Co1  | Cl1  | 2.2625(8) | C1   | C6   | 1.501(4) |
| Co1  | Cl2  | 2.2865(9) | C2   | C3   | 1.378(4) |
| Co1  | N1   | 2.007(2)  | C3   | C4   | 1.387(4) |
| Co1  | N2   | 2.299(2)  | C4   | C5   | 1.384(4) |
| Co1  | N4   | 2.280(2)  | C5   | C11  | 1.518(4) |
| N1   | C1   | 1.343(3)  | C7   | C8   | 1.516(4) |
| N1   | C5   | 1.340(3)  | C9   | C10  | 1.514(4) |
| N2   | C6   | 1.489(3)  | C12  | C13  | 1.511(4) |
| N2   | C7   | 1.492(3)  | C14  | C15  | 1.512(4) |
| N2   | C10  | 1.485(3)  | B1   | F1   | 1.389(4) |
| N3   | C8   | 1.496(3)  | B1   | F2   | 1.395(4) |
| N3   | C9   | 1.492(3)  | B1   | F3   | 1.392(4) |
| N4   | C11  | 1.470(3)  | B1   | F4   | 1.389(4) |
| N4   | C12  | 1.483(3)  | B2   | F5   | 1.394(4) |
| N4   | C15  | 1.487(3)  | B2   | F6   | 1.394(4) |
| N5   | C13  | 1.499(4)  | B2   | F7   | 1.354(4) |
| N5   | C14  | 1.492(4)  | B2   | F8   | 1.360(4) |
| C1   | C2   | 1.388(4)  |      |      |          |

**Table S17 Bond Angles for NNNCoBF<sub>4</sub>.**

| Atom | Atom | Atom | Angle/°    | Atom | Atom | Atom | Angle/°  |
|------|------|------|------------|------|------|------|----------|
| Cl1  | Co1  | Cl2  | 115.71(4)  | C2   | C1   | C6   | 124.5(2) |
| Cl1  | Co1  | N2   | 99.30(6)   | C3   | C2   | C1   | 118.7(3) |
| Cl1  | Co1  | N4   | 96.82(6)   | C2   | C3   | C4   | 120.2(2) |
| Cl2  | Co1  | N2   | 96.62(6)   | C5   | C4   | C3   | 118.8(3) |
| N1   | Co1  | Cl1  | 112.67(6)  | N1   | C5   | C4   | 120.3(3) |
| N1   | Co1  | Cl2  | 131.55(6)  | N1   | C5   | C11  | 115.3(2) |
| N1   | Co1  | N2   | 78.08(9)   | C4   | C5   | C11  | 124.3(3) |
| N1   | Co1  | N4   | 76.88(9)   | N2   | C6   | C1   | 110.3(2) |
| N4   | Co1  | Cl2  | 94.63(6)   | N2   | C7   | C8   | 114.0(2) |
| N4   | Co1  | N2   | 153.96(8)  | N3   | C8   | C7   | 109.6(2) |
| C1   | N1   | Co1  | 119.43(18) | N3   | C9   | C10  | 109.7(2) |
| C5   | N1   | Co1  | 118.67(17) | N2   | C10  | C9   | 114.7(2) |
| C5   | N1   | C1   | 121.5(2)   | N4   | C11  | C5   | 110.5(2) |
| C6   | N2   | Co1  | 103.12(15) | N4   | C12  | C13  | 113.8(2) |
| C6   | N2   | C7   | 111.5(2)   | N5   | C13  | C12  | 109.9(2) |
| C7   | N2   | Co1  | 110.33(15) | N5   | C14  | C15  | 109.6(2) |
| C10  | N2   | Co1  | 111.77(15) | N4   | C15  | C14  | 114.4(2) |
| C10  | N2   | C6   | 112.31(19) | F1   | B1   | F2   | 108.1(3) |
| C10  | N2   | C7   | 107.82(19) | F1   | B1   | F3   | 111.1(3) |
| C9   | N3   | C8   | 111.8(2)   | F1   | B1   | F4   | 108.9(2) |
| C11  | N4   | Co1  | 103.23(15) | F3   | B1   | F2   | 109.1(2) |
| C11  | N4   | C12  | 112.5(2)   | F4   | B1   | F2   | 110.0(3) |

|     |    |     |            |    |    |    |          |
|-----|----|-----|------------|----|----|----|----------|
| C11 | N4 | C15 | 112.0(2)   | F4 | B1 | F3 | 109.7(3) |
| C12 | N4 | Co1 | 112.71(16) | F5 | B2 | F6 | 106.6(3) |
| C12 | N4 | C15 | 108.4(2)   | F7 | B2 | F5 | 107.6(3) |
| C15 | N4 | Co1 | 107.82(15) | F7 | B2 | F6 | 112.0(3) |
| C14 | N5 | C13 | 110.8(2)   | F7 | B2 | F8 | 112.7(3) |
| N1  | C1 | C2  | 120.4(3)   | F8 | B2 | F5 | 106.1(3) |
| N1  | C1 | C6  | 115.0(2)   | F8 | B2 | F6 | 111.3(3) |

**Table S18 Hydrogen Bonds for NNNCoBF<sub>4</sub>.**

| D       | H               | A                | d(D-H)/Å  | d(H-A)/Å  | d(D-A)/Å | D-H-A/° |
|---------|-----------------|------------------|-----------|-----------|----------|---------|
| N3      | H3A             | C12 <sup>1</sup> | 0.91      | 2.29      | 3.171(3) | 161.5   |
| N3      | H3B             | F2 <sup>2</sup>  | 0.91      | 2.05      | 2.791(3) | 137.8   |
| N5      | H5A             | O1W <sup>3</sup> | 0.91      | 1.90      | 2.788(3) | 165.2   |
| N5      | H5B             | F4 <sup>4</sup>  | 0.91      | 2.00      | 2.864(3) | 156.9   |
| O1WH1OW | F8 <sup>5</sup> |                  | 0.829(10) | 1.964(10) | 2.792(3) | 177(3)  |
| O1WH2OW | F6              |                  | 0.835(10) | 2.113(15) | 2.891(3) | 155(3)  |

<sup>1</sup>-X,1-Y,2-Z; <sup>2</sup>1-X,-Y,2-Z; <sup>3</sup>+X,1+Y,+Z; <sup>4</sup>1-X,1-Y,2-Z; <sup>5</sup>1+X,+Y,+Z

**Table S19 Torsion Angles for NNNCoBF<sub>4</sub>.**

| A   | B   | C   | D   | Angle/°     |
|-----|-----|-----|-----|-------------|
| Co1 | N1  | C1  | C2  | 169.79(17)  |
| Co1 | N1  | C1  | C6  | -13.4(3)    |
| Co1 | N1  | C5  | C4  | -171.95(17) |
| Co1 | N1  | C5  | C11 | 5.6(3)      |
| Co1 | N2  | C6  | C1  | -38.7(2)    |
| Co1 | N2  | C7  | C8  | -177.07(17) |
| Co1 | N2  | C10 | C9  | 175.79(16)  |
| Co1 | N4  | C11 | C5  | -39.0(2)    |
| Co1 | N4  | C12 | C13 | 173.28(18)  |
| Co1 | N4  | C15 | C14 | -176.30(18) |
| N1  | C1  | C2  | C3  | 2.1(4)      |
| N1  | C1  | C6  | N2  | 37.5(3)     |
| N1  | C5  | C11 | N4  | 26.0(3)     |
| N2  | C7  | C8  | N3  | 56.6(3)     |
| N3  | C9  | C10 | N2  | -55.7(3)    |
| N4  | C12 | C13 | N5  | -56.7(3)    |
| N5  | C14 | C15 | N4  | 56.2(3)     |
| C1  | N1  | C5  | C4  | 0.6(3)      |
| C1  | N1  | C5  | C11 | 178.2(2)    |
| C1  | C2  | C3  | C4  | 0.5(4)      |
| C2  | C1  | C6  | N2  | -145.8(2)   |
| C2  | C3  | C4  | C5  | -2.5(4)     |
| C3  | C4  | C5  | N1  | 2.0(4)      |
| C3  | C4  | C5  | C11 | -175.3(2)   |
| C4  | C5  | C11 | N4  | -156.5(2)   |
| C5  | N1  | C1  | C2  | -2.7(3)     |

|     |    |     |     |            |
|-----|----|-----|-----|------------|
| C5  | N1 | C1  | C6  | 174.1 (2)  |
| C6  | N2 | C7  | C8  | 69.0 (3)   |
| C6  | N2 | C10 | C9  | -68.9 (3)  |
| C6  | C1 | C2  | C3  | -174.4 (2) |
| C7  | N2 | C6  | C1  | 79.6 (3)   |
| C7  | N2 | C10 | C9  | 54.4 (3)   |
| C8  | N3 | C9  | C10 | 55.0 (3)   |
| C9  | N3 | C8  | C7  | -55.6 (3)  |
| C10 | N2 | C6  | C1  | -159.2 (2) |
| C10 | N2 | C7  | C8  | -54.8 (3)  |
| C11 | N4 | C12 | C13 | -70.5 (3)  |
| C11 | N4 | C15 | C14 | 70.8 (3)   |
| C12 | N4 | C11 | C5  | -160.8 (2) |
| C12 | N4 | C15 | C14 | -54.0 (3)  |
| C13 | N5 | C14 | C15 | -56.1 (3)  |
| C14 | N5 | C13 | C12 | 56.7 (3)   |
| C15 | N4 | C11 | C5  | 76.7 (3)   |
| C15 | N4 | C12 | C13 | 54.0 (3)   |

**Table S20 Hydrogen Atom Coordinates ( $\text{\AA}\times 10^4$ ) and Isotropic Displacement Parameters ( $\text{\AA}^2\times 10^3$ ) for NNNCoBF<sub>4</sub>.**

| Atom | x    | y     | Z     | U(eq) |
|------|------|-------|-------|-------|
| H3A  | 336  | 2490  | 9576  | 25    |
| H3B  | 1836 | 1566  | 9468  | 25    |
| H5A  | 4415 | 10103 | 7287  | 30    |
| H5B  | 3536 | 9599  | 8231  | 30    |
| H2   | 7960 | 3263  | 6155  | 27    |
| H3   | 8778 | 4292  | 4732  | 29    |
| H4   | 7289 | 6010  | 4758  | 27    |
| H6A  | 5679 | 3078  | 7867  | 25    |
| H6B  | 6224 | 4029  | 8459  | 25    |
| H7A  | 2275 | 3602  | 7207  | 23    |
| H7B  | 502  | 3825  | 8187  | 23    |
| H8A  | 1162 | 2046  | 7880  | 28    |
| H8B  | 3493 | 2057  | 7909  | 28    |
| H9A  | 4372 | 2493  | 9640  | 27    |
| H9B  | 2540 | 2748  | 10594 | 27    |
| H10A | 1377 | 4253  | 9838  | 22    |
| H10B | 3687 | 4282  | 9879  | 22    |
| H11A | 5126 | 7511  | 5882  | 25    |
| H11B | 3116 | 6994  | 5896  | 25    |
| H12A | 1215 | 8245  | 8180  | 25    |
| H12B | 794  | 7965  | 7088  | 25    |
| H13A | 2910 | 9142  | 6299  | 32    |
| H13B | 1225 | 9724  | 7188  | 32    |
| H14A | 6824 | 8882  | 7760  | 28    |



|      |           |           |           |    |
|------|-----------|-----------|-----------|----|
| H14B | 6425      | 8622      | 6654      | 28 |
| H15A | 6335      | 7132      | 7640      | 23 |
| H15B | 4670      | 7725      | 8524      | 23 |
| H1OW | 6830 (16) | 1120 (30) | 6330 (20) | 37 |
| H2OW | 5090 (40) | 1140 (30) | 5932 (16) | 37 |

## Experimental

A suitable crystal of  $C_{15}H_{29}B_2Cl_2CoF_8N_5O$  [NNNCoBF<sub>4</sub>] was selected and mounted on a diffractometer. The crystal was kept at 373(2) K. Using Olex2 [1], the structure was solved with the XS [2] structure solution program using Direct Methods and refined with the XL [3] refinement package using Least Squares minimisation.

[1] O. V. Dolomanov, L. J. Bourhis, R. J. Gildea, J. A. K. Howard and H. Puschmann, OLEX2: a complete structure solution, refinement and analysis program. *J. Appl. Cryst.* (2009). 42, 339-341.

[2] *SHELXT-2014/5*(Sheldrick, 2015a).

[3] XL, G.M. Sheldrick, *Acta Cryst.* (2008). A64, 112-122.

## Crystal structure determination of [NNNCoBF<sub>4</sub>]

**Crystal Data.**  $C_{15}H_{29}B_2Cl_2CoF_8N_5O$ ,  $M = 598.88$ , triclinic,  $a = 6.8380(14)$  Å,  $b = 13.077(3)$  Å,  $c = 13.377(3)$  Å,  $\alpha = 89.44(3)$ ,  $\beta = 78.44(3)$ ,  $\gamma = 82.78(3)$ ,  $U = 1162.5(4)$  Å<sup>3</sup>,  $T = 373(2)$ , space group P-1 (no. 2),  $Z = 2$ ,  $\mu(\text{synchrotron}) = 0.752$ , 11996 reflections measured, 6106 unique ( $R_{\text{int}} = 0.0298$ ) which were used in all calculations. The final  $wR(F_2)$  was 0.1304 (all data).

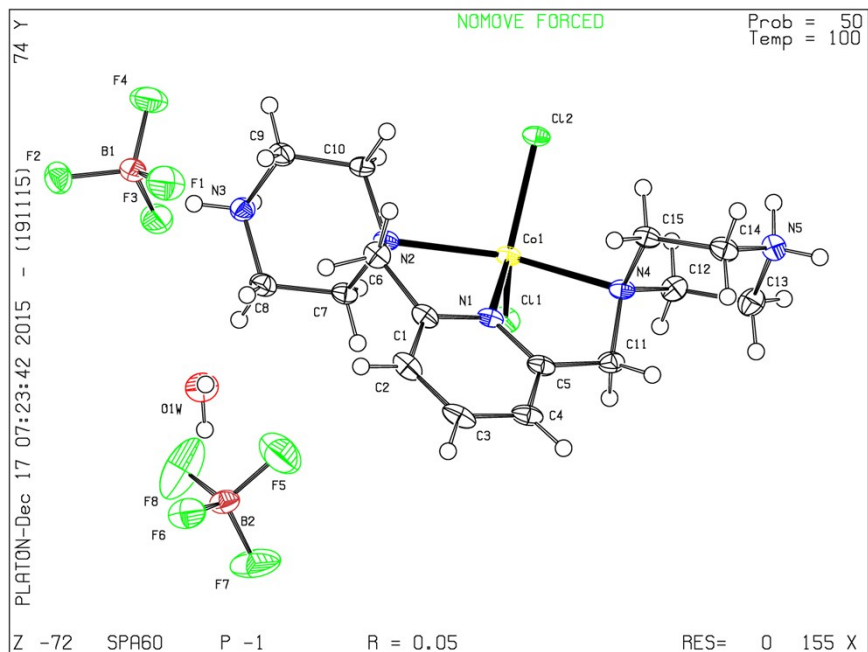

## 6. References:

- S1. W. L. F. Armarego and Perrin, D. D. *Purification of Laboratory Chemicals* (Pergamon Press, Oxford, 1988) ed 3.
- S2. V. G. Landge, J. Pitchaimani, S. P. Midya, M. Subramanian, V. Madhu, E. Balaraman, *Catal. Sci. Technol.*, **2018**, *8*, 428-433.

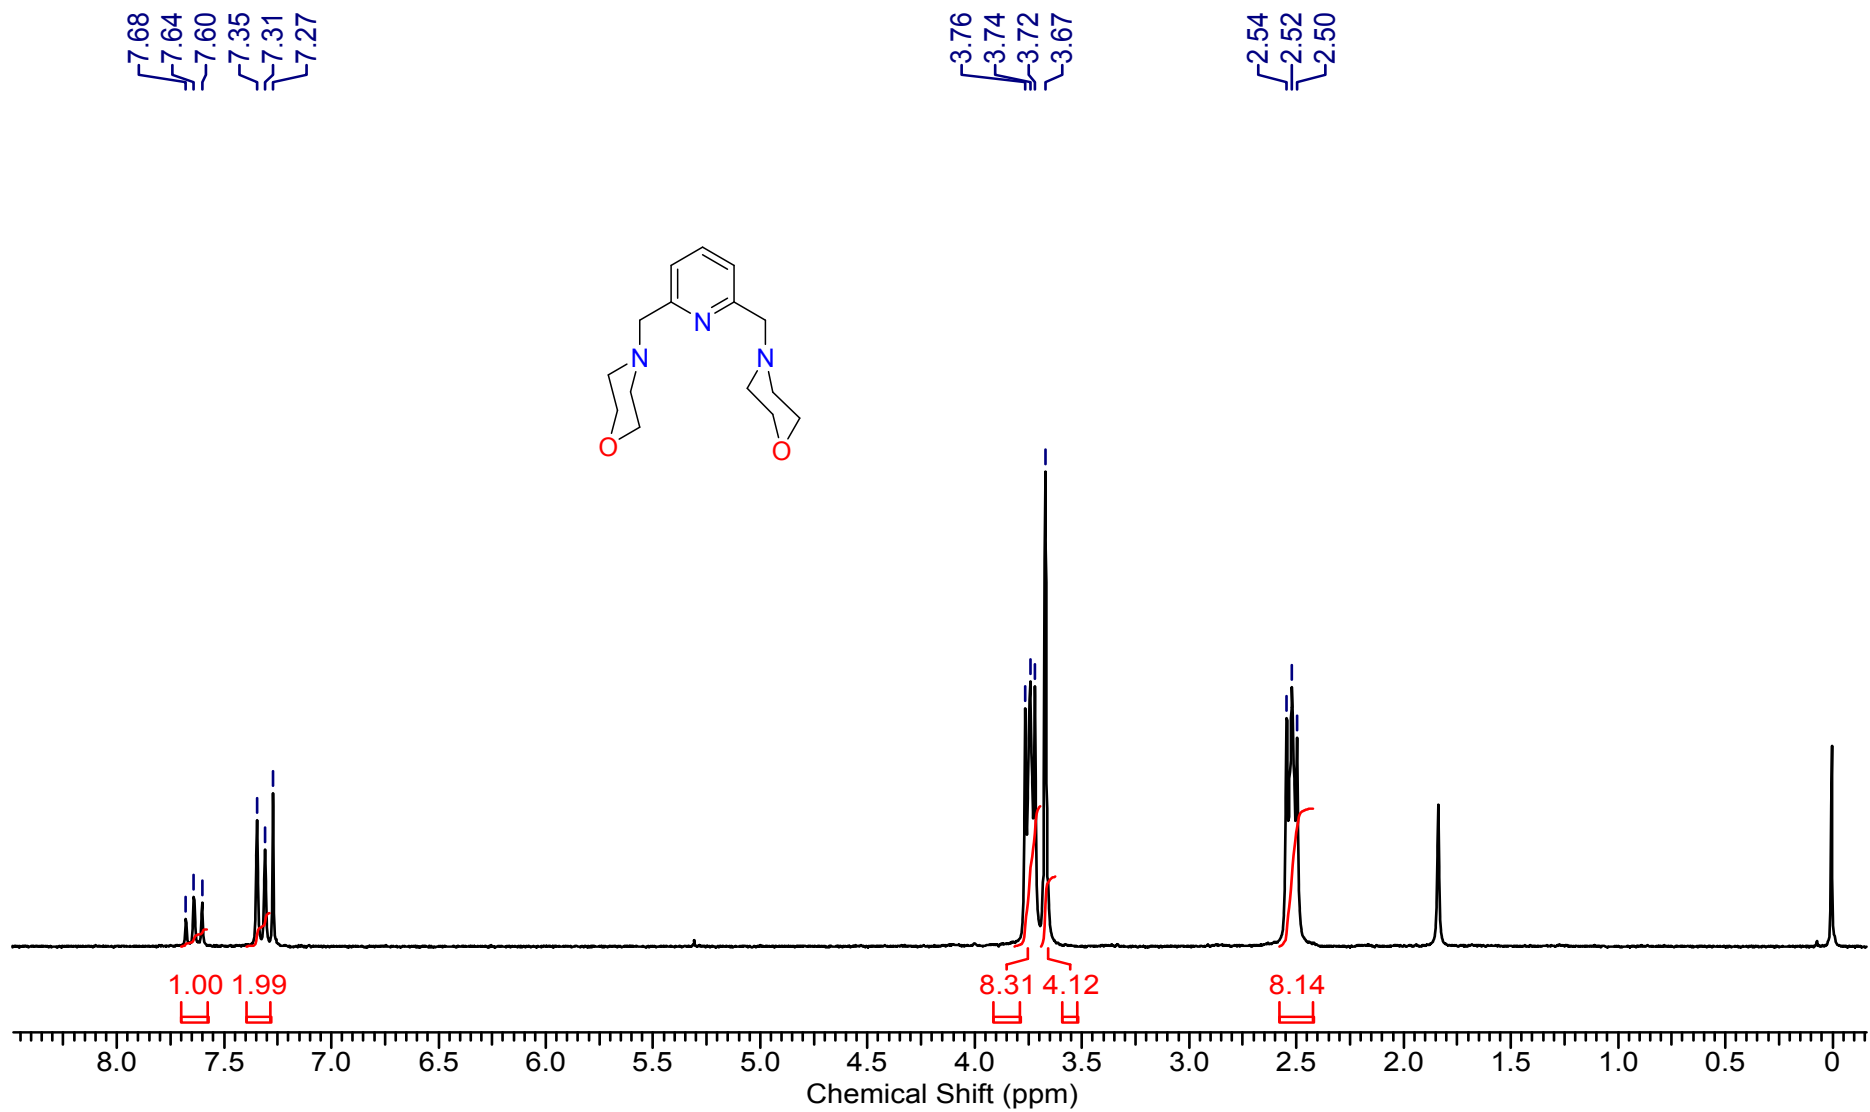

**Figure S10.** <sup>1</sup>H of Py-N<sup>3</sup> (L<sub>1</sub>)

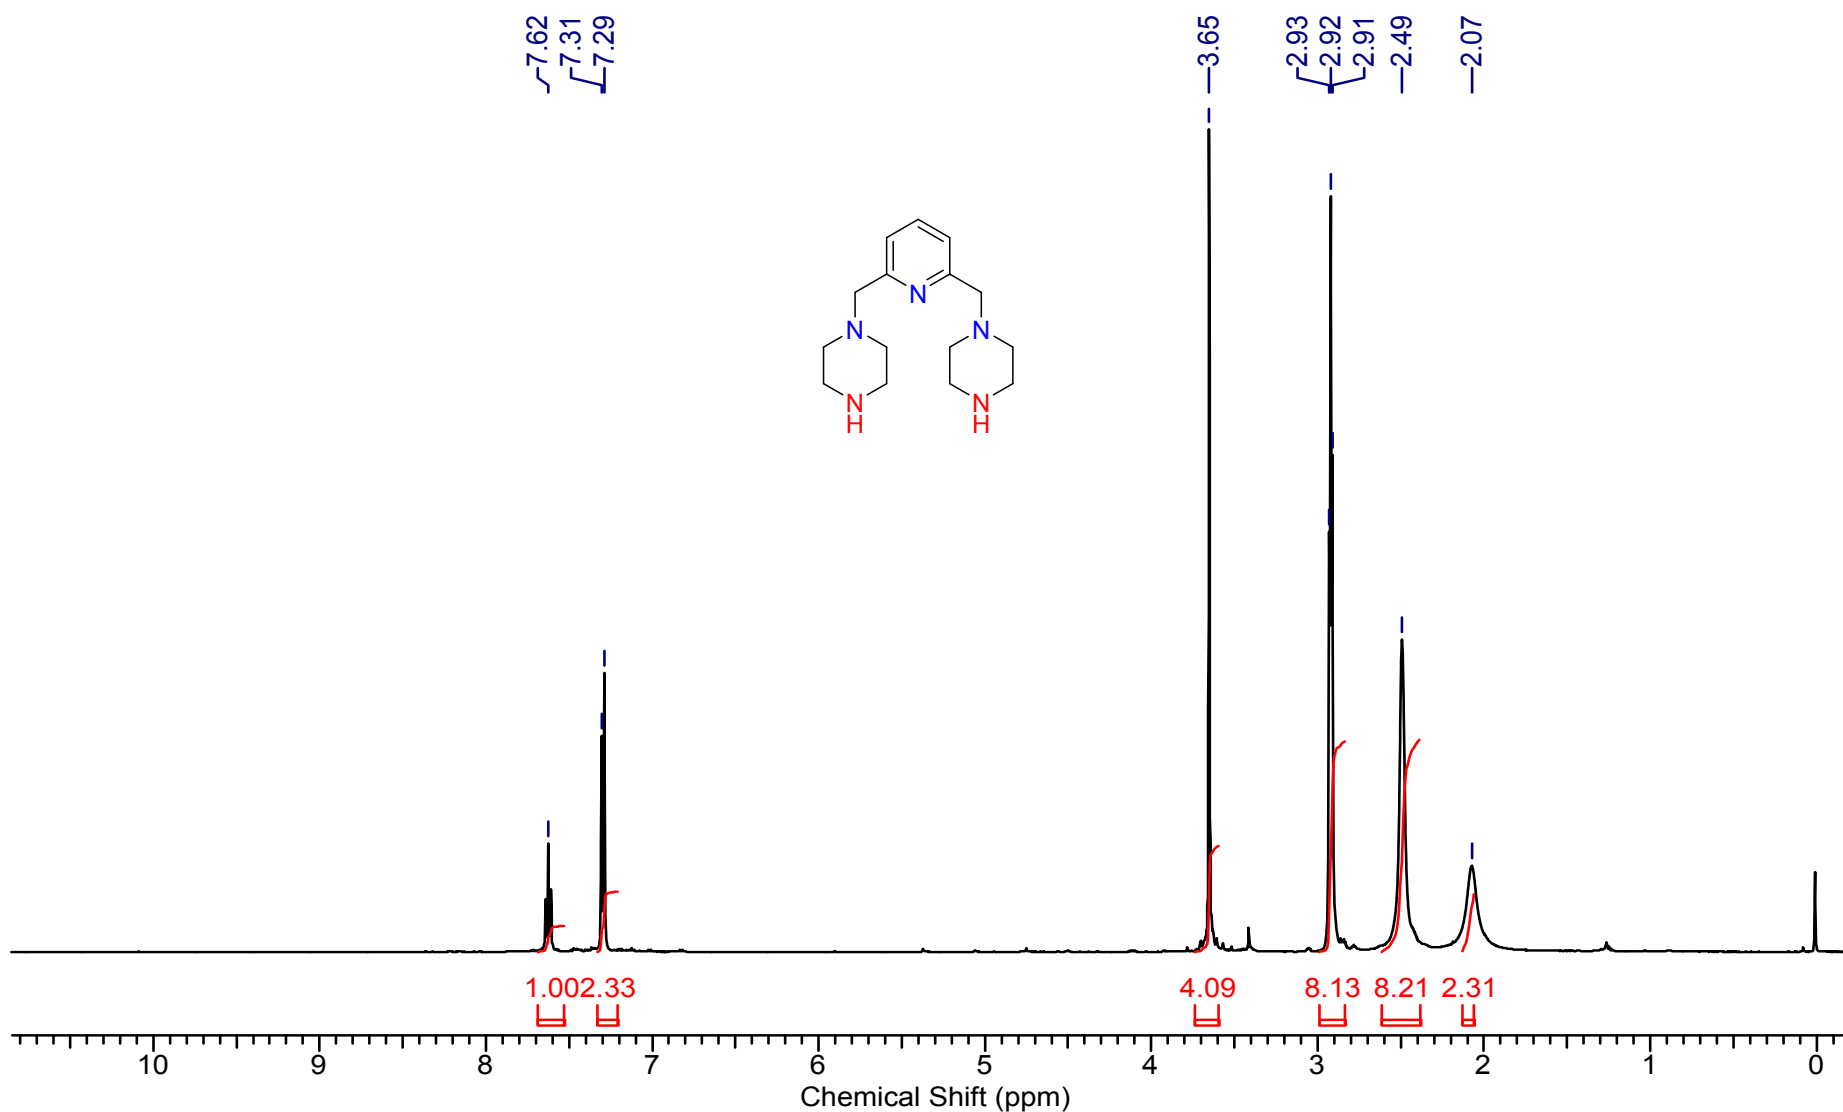

Figure S11. <sup>1</sup>H of L<sub>2</sub>

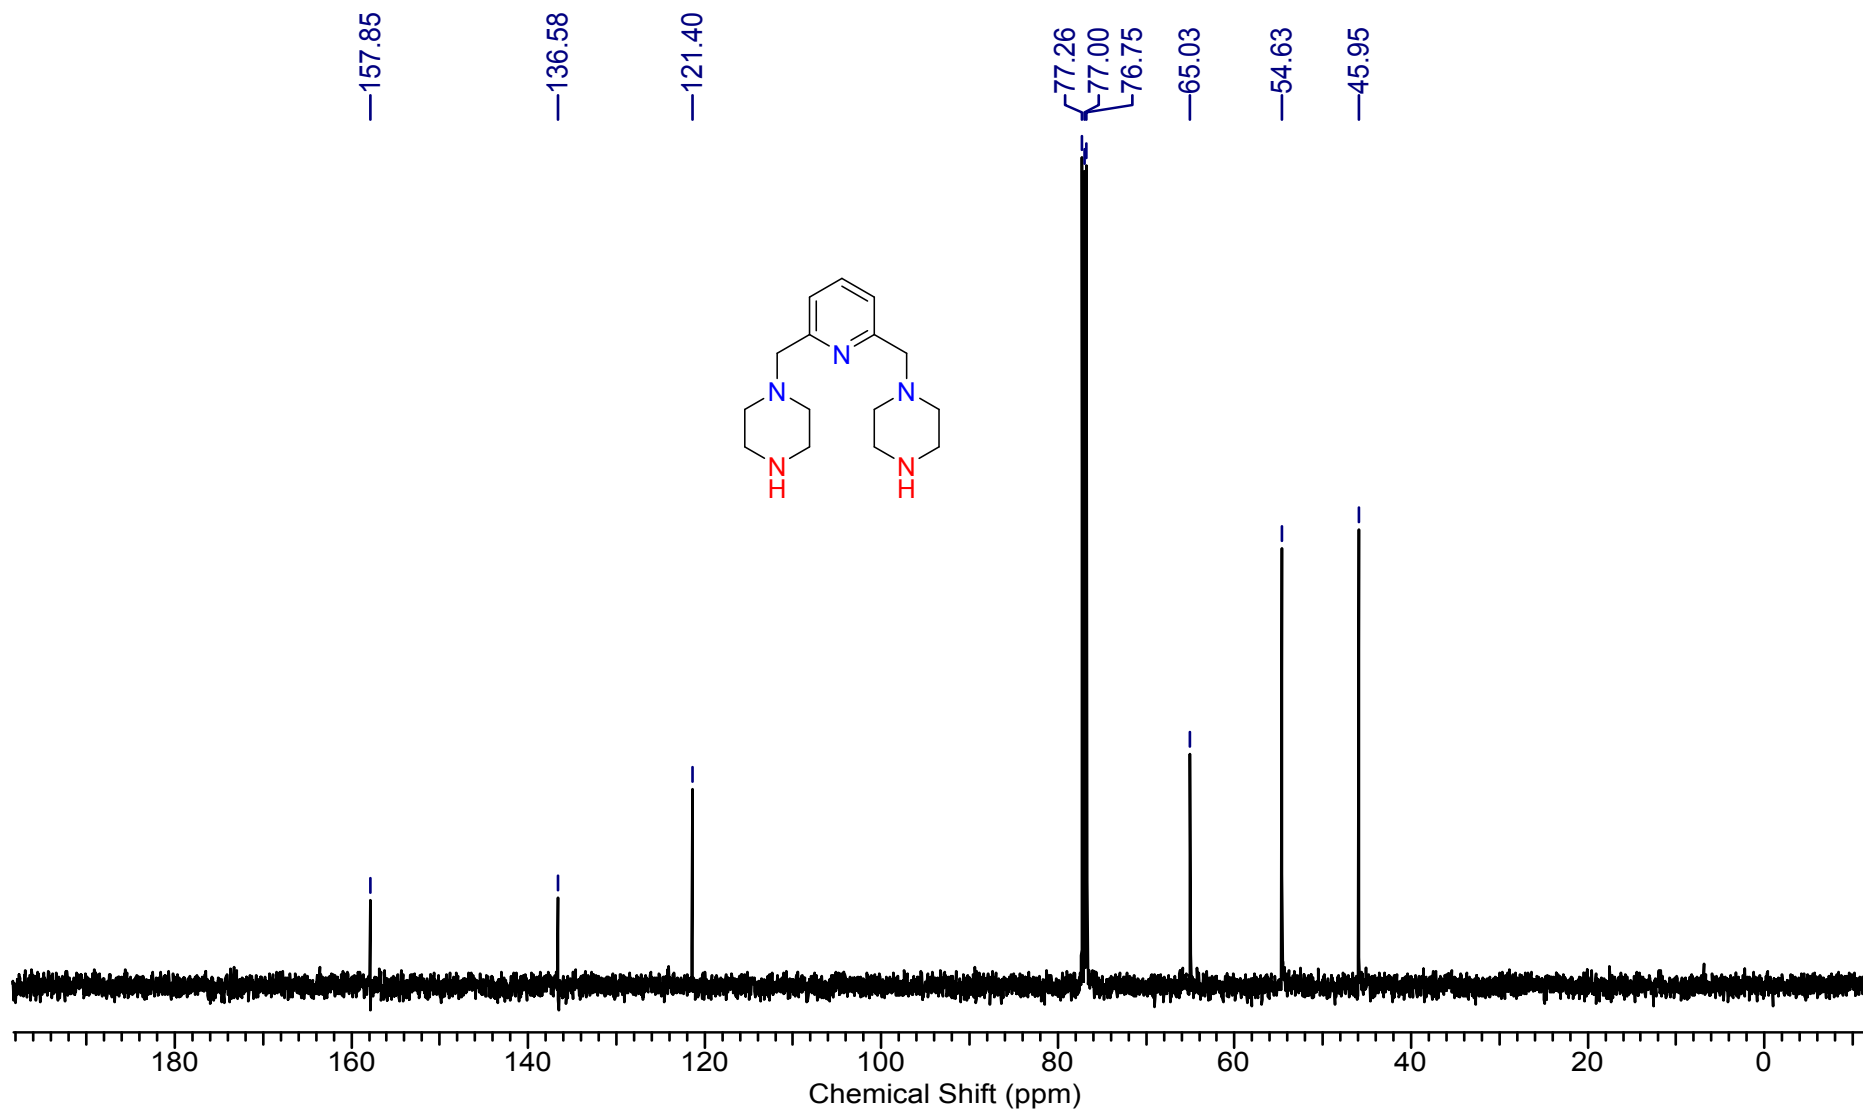

Figure S12.  $^{13}\text{C}$  of  $\text{L}_2$

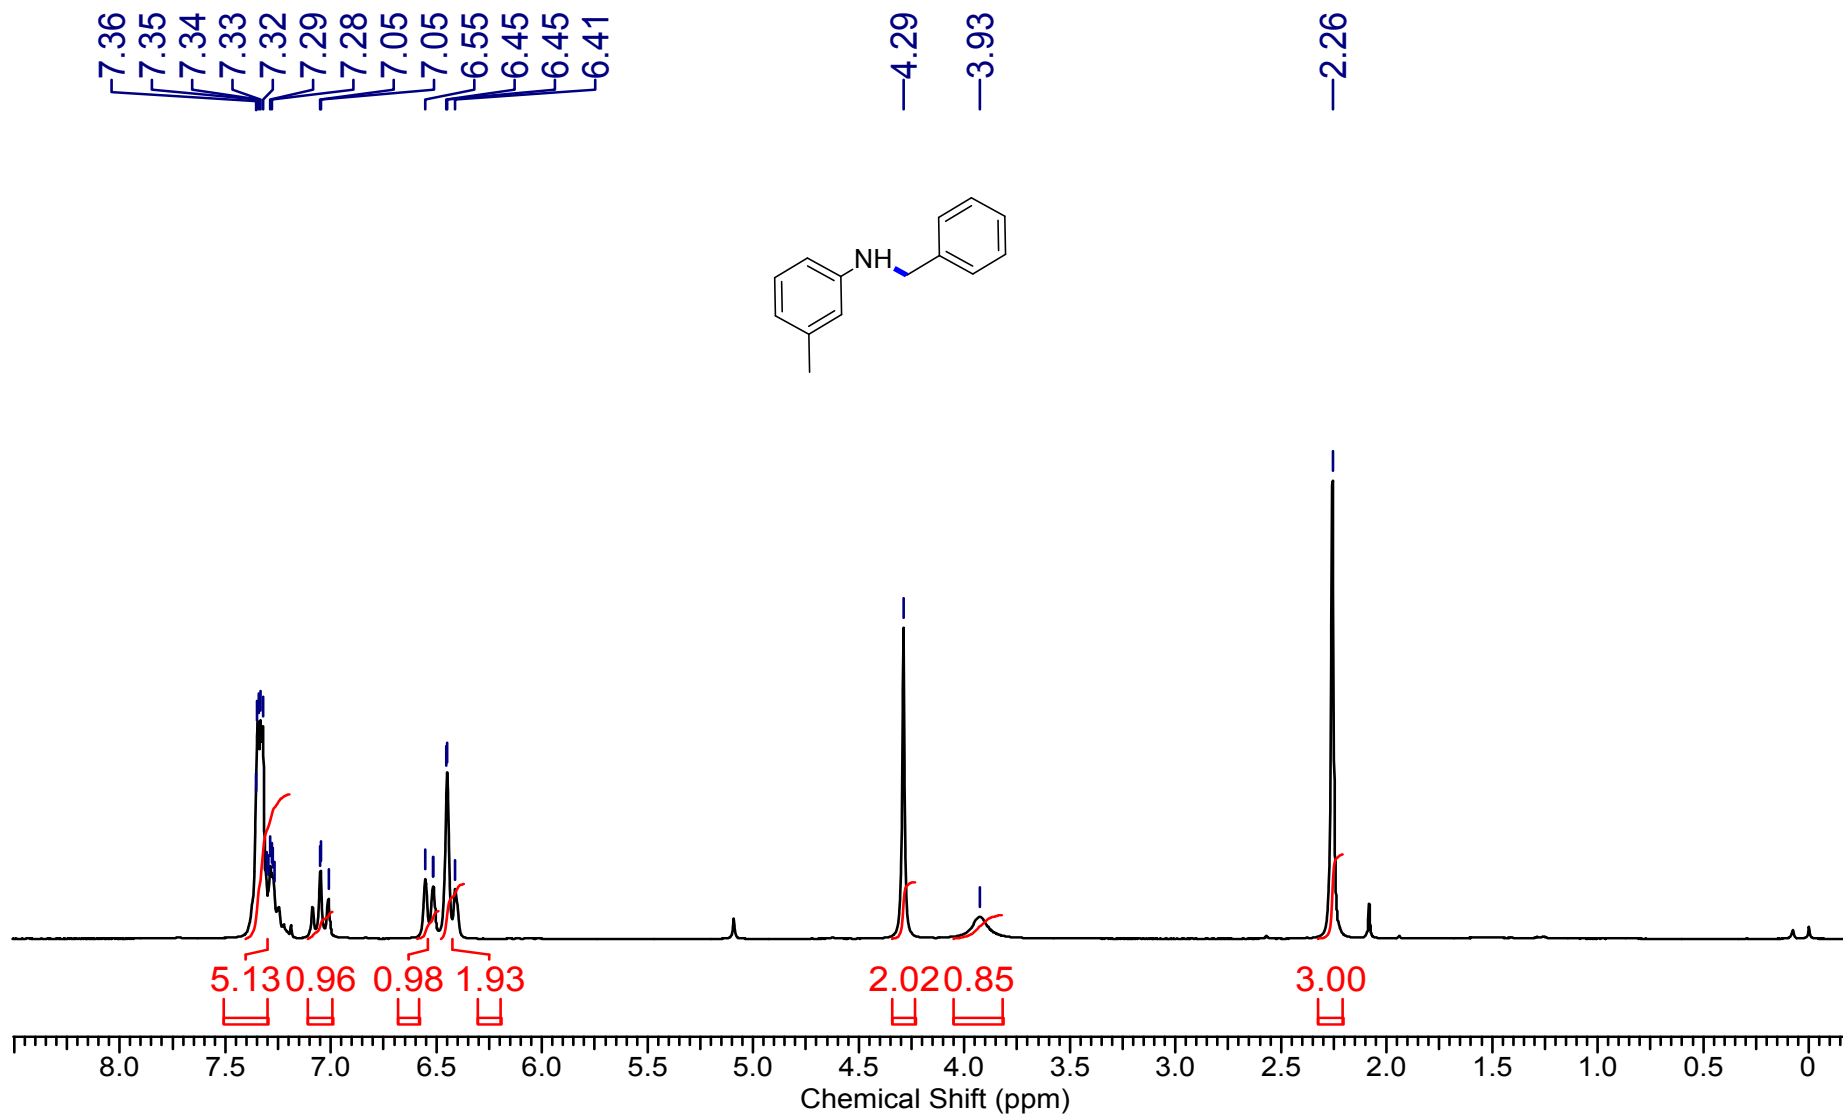

Figure S13.  $^1\text{H}$  of 5a

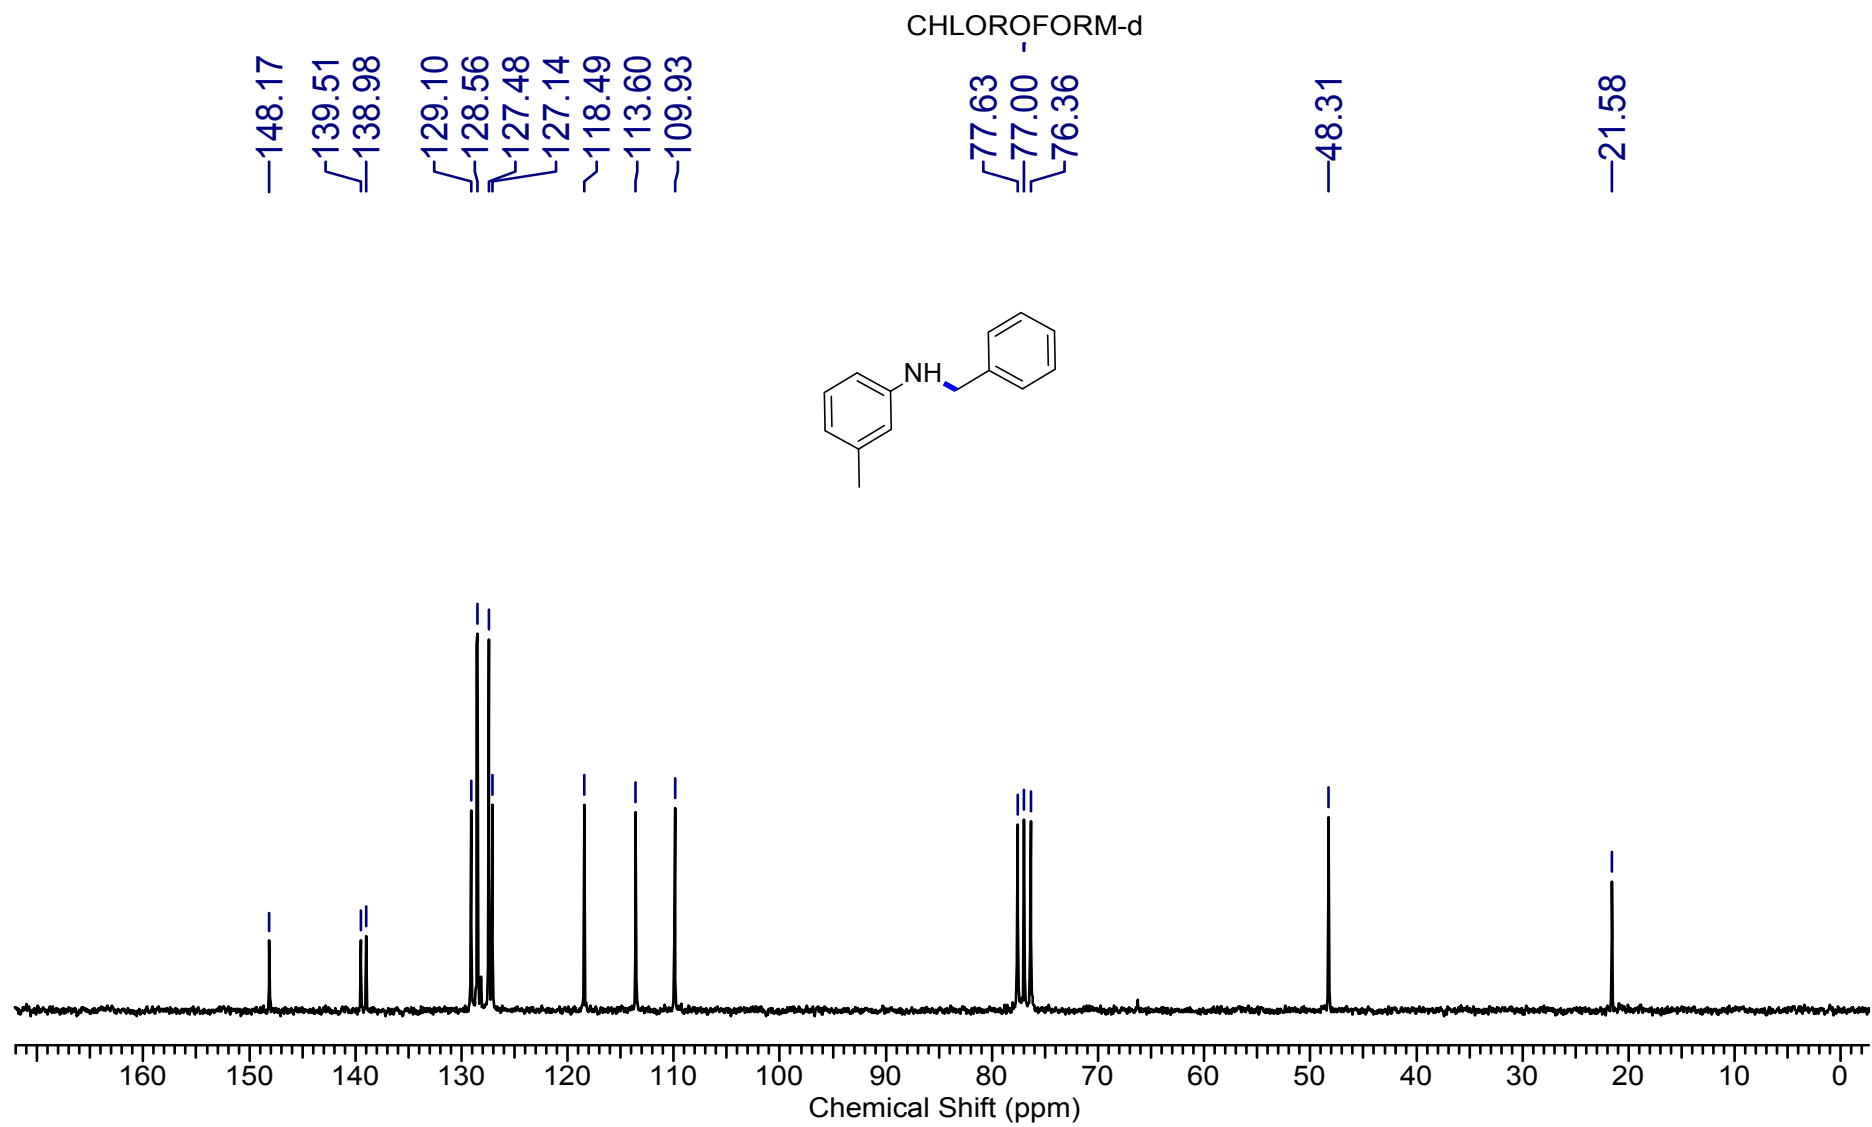

Figure S14.  $^{13}\text{C}$  of 5a

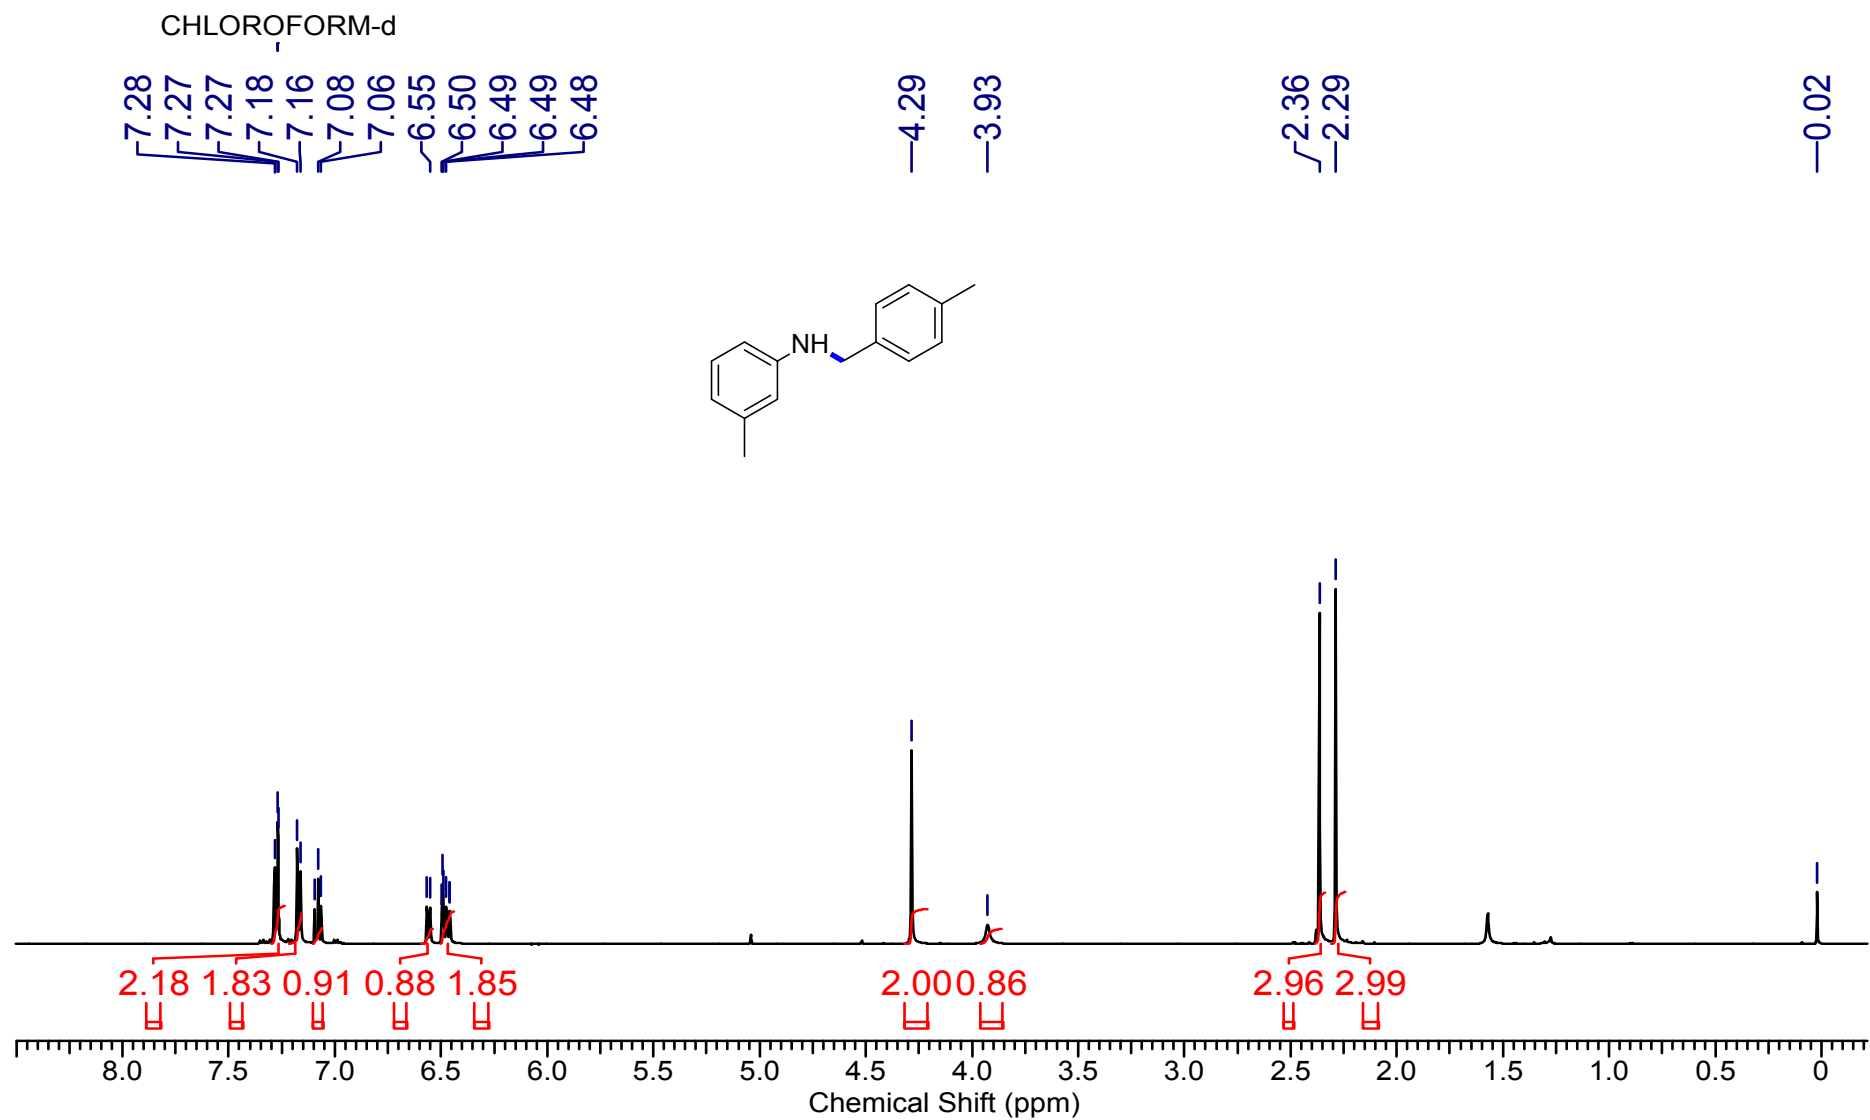

Figure S15.  $^1\text{H}$  of **5b**



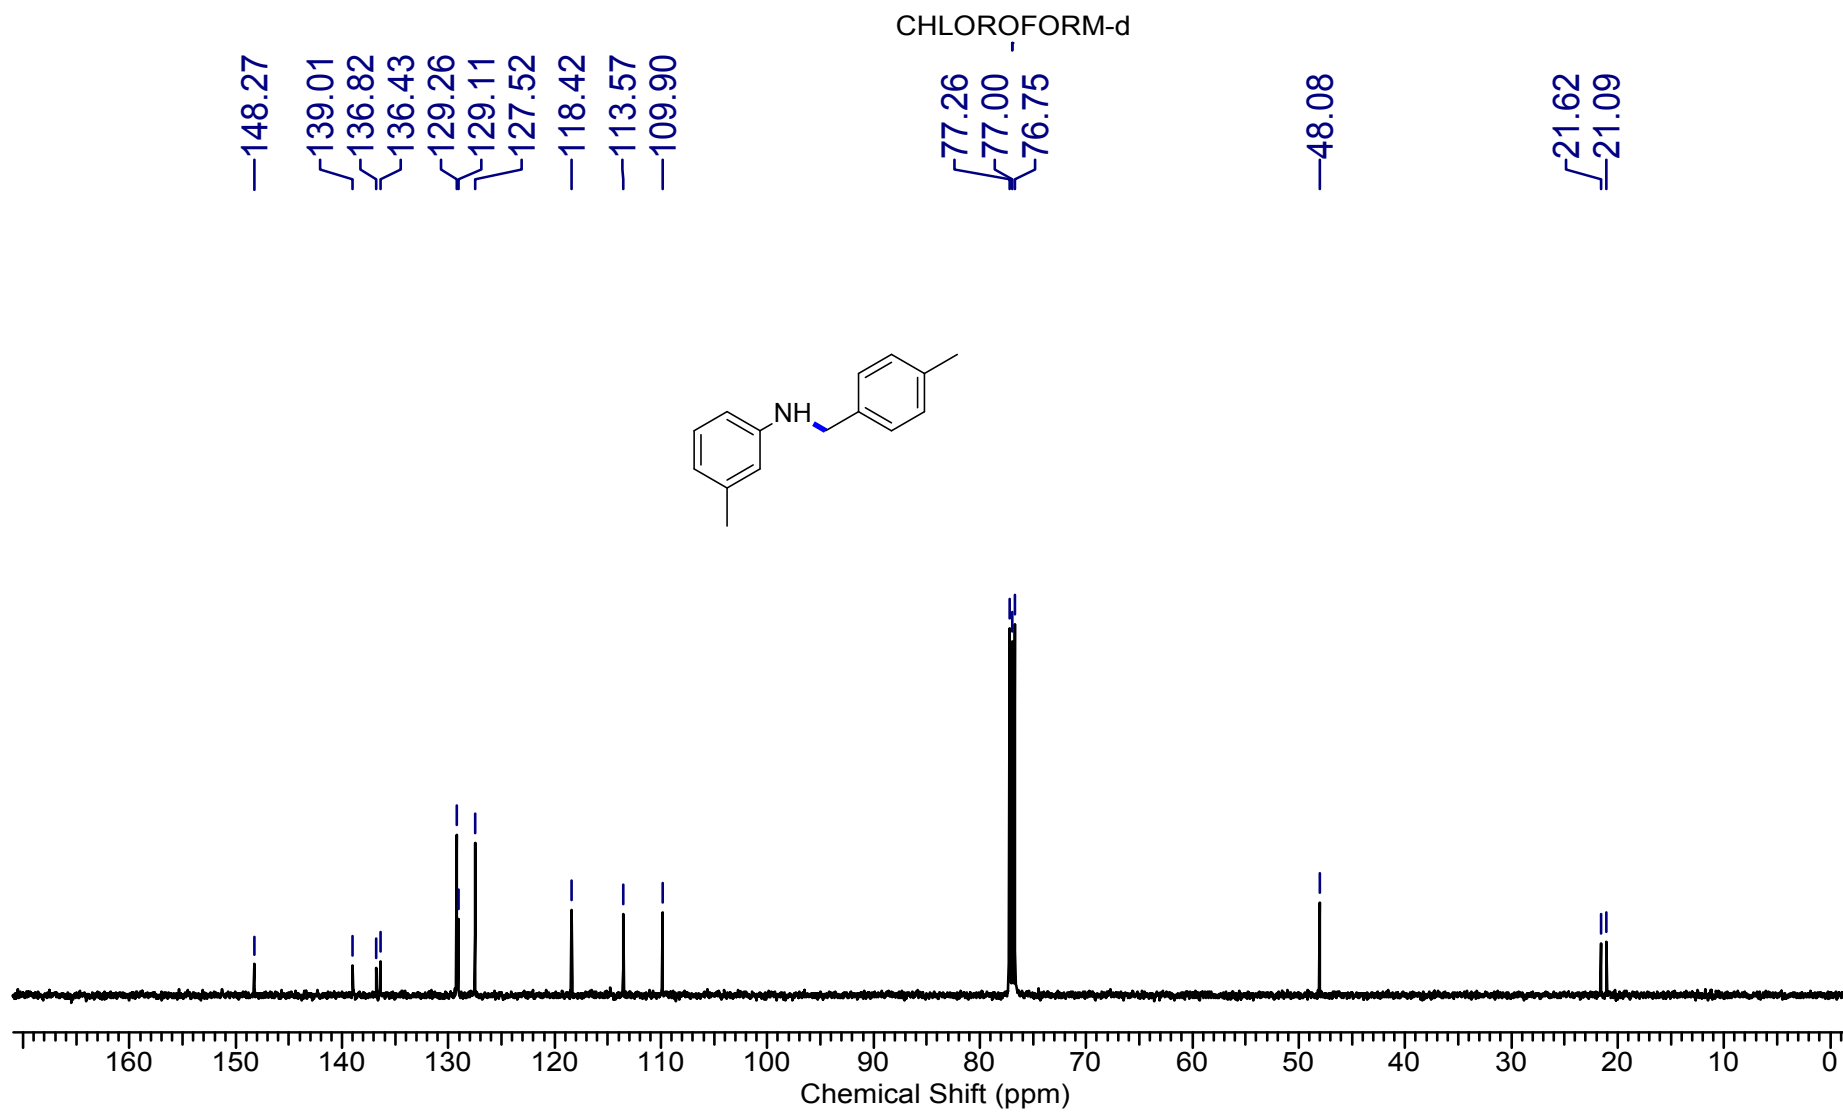

Figure S16.  $^{13}\text{C}$  of 5b

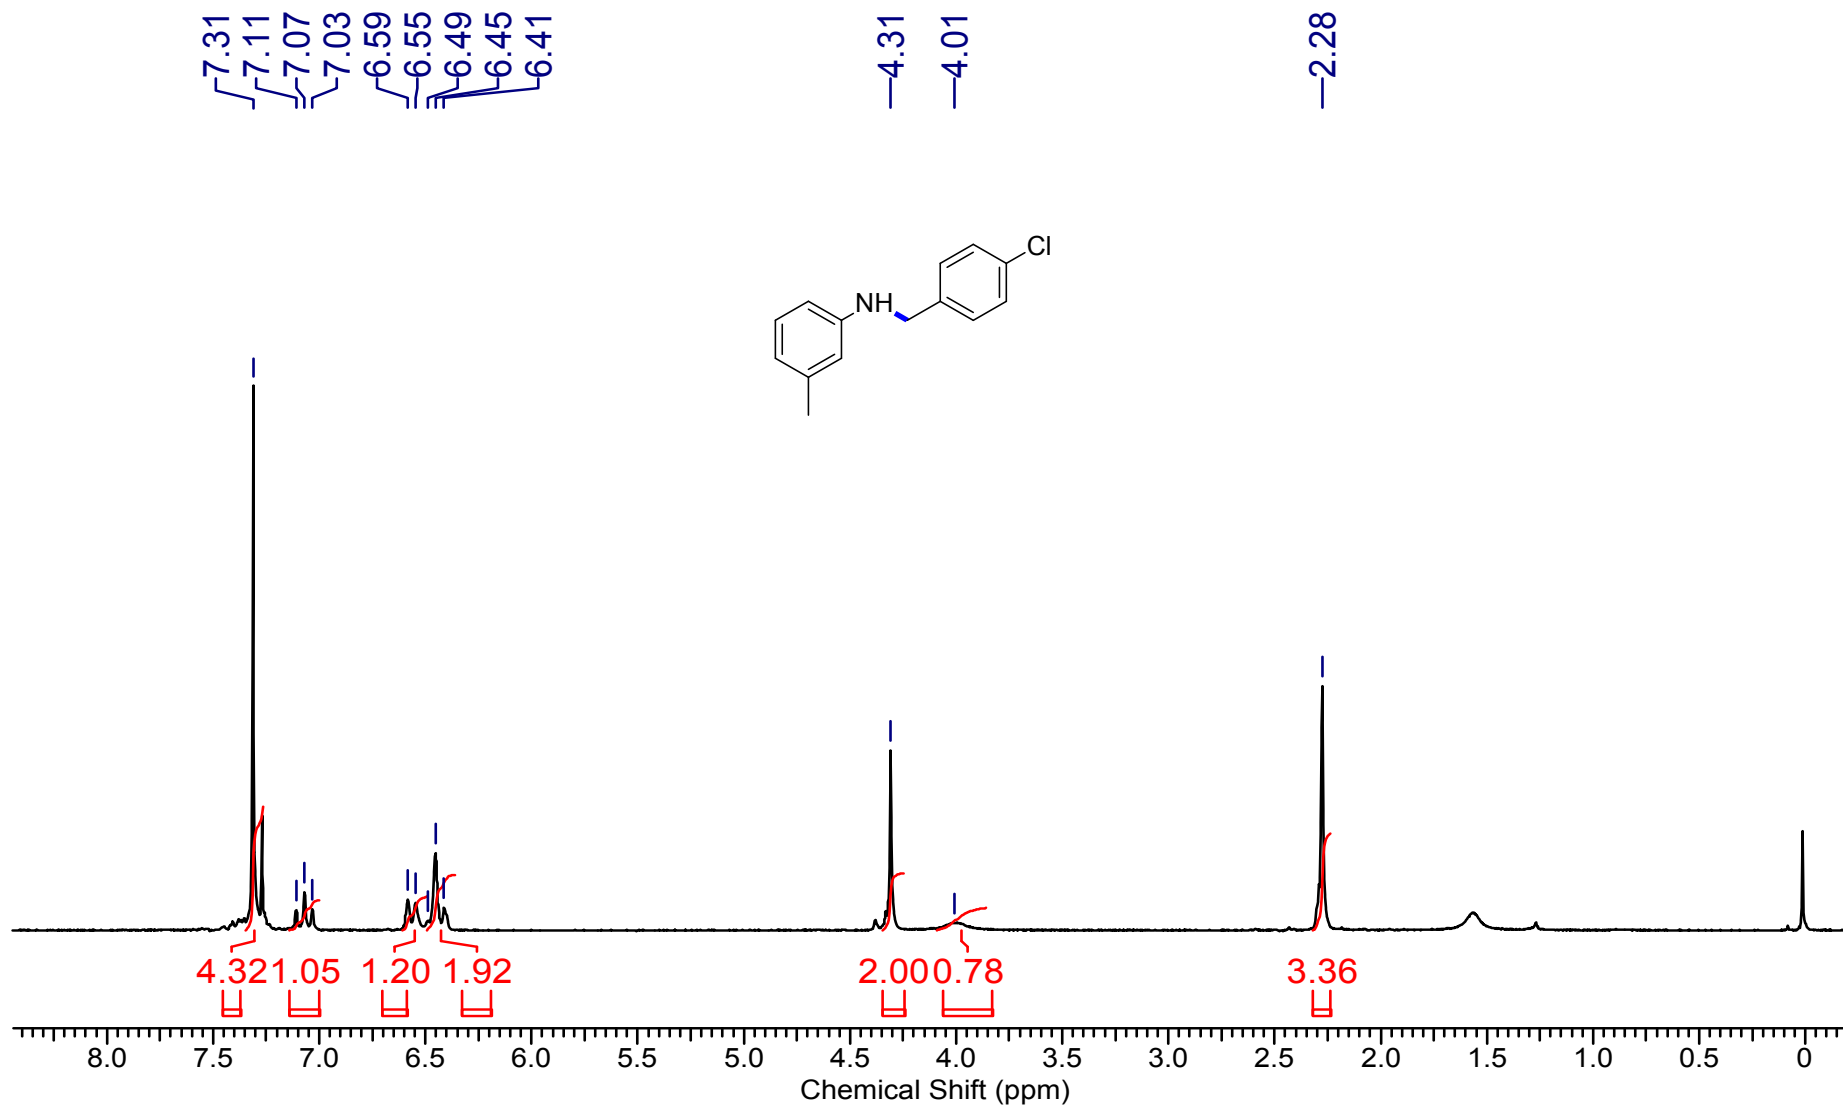

Figure S17. <sup>1</sup>H of 5c

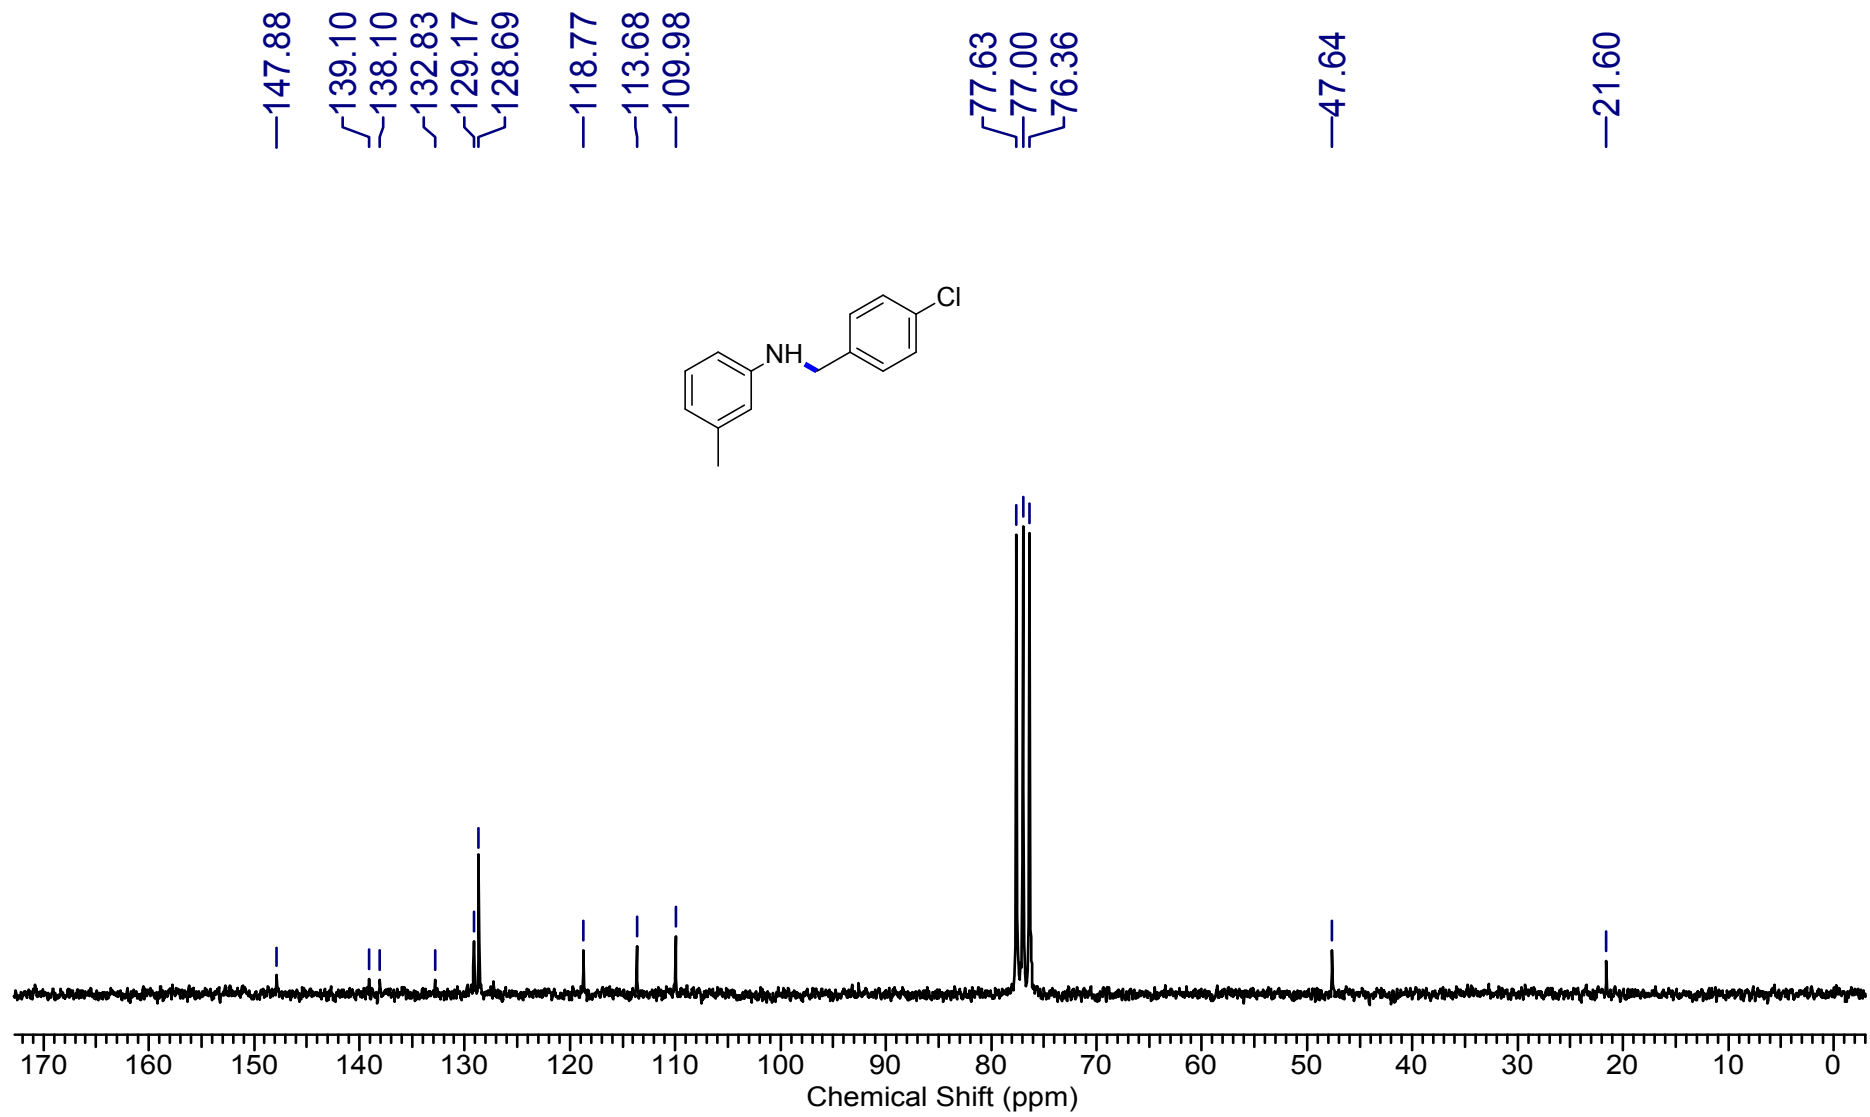

Figure S18.  $^{13}\text{C}$  of 5c

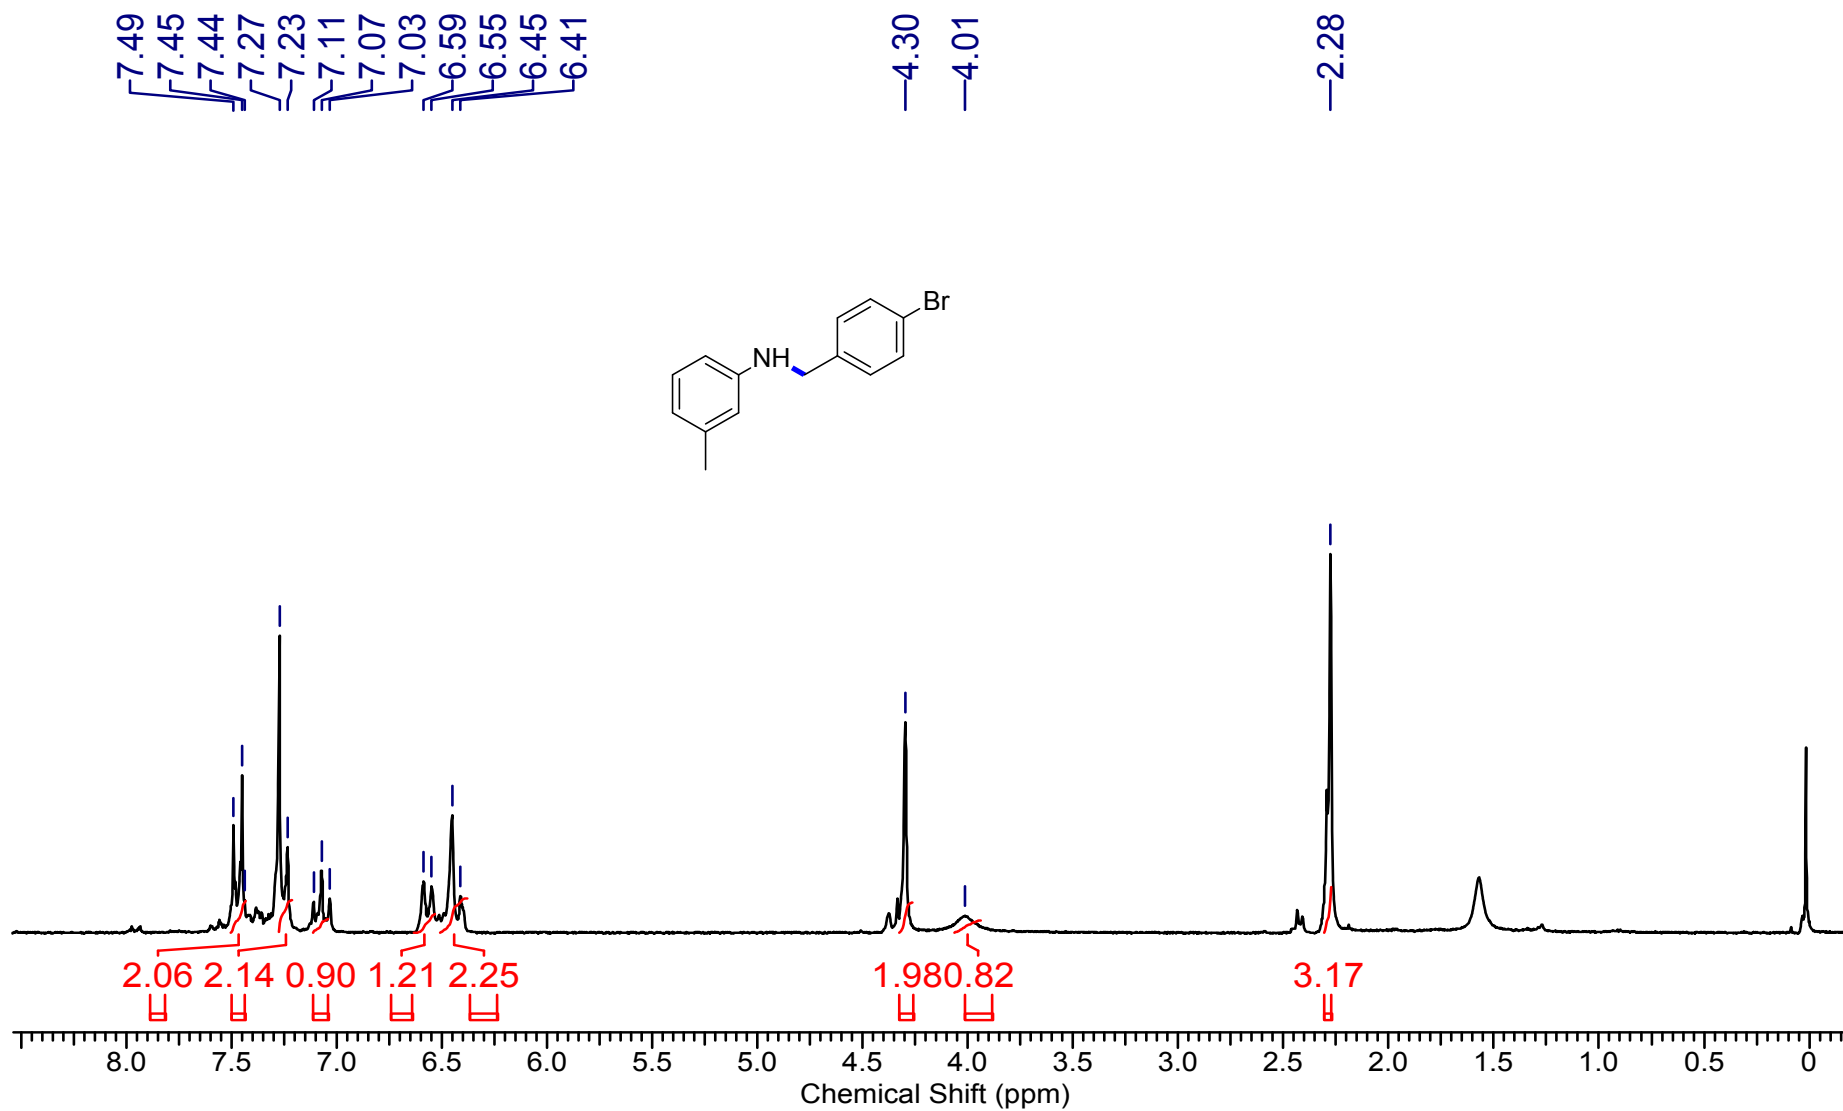

Figure S19. <sup>1</sup>H of 5d

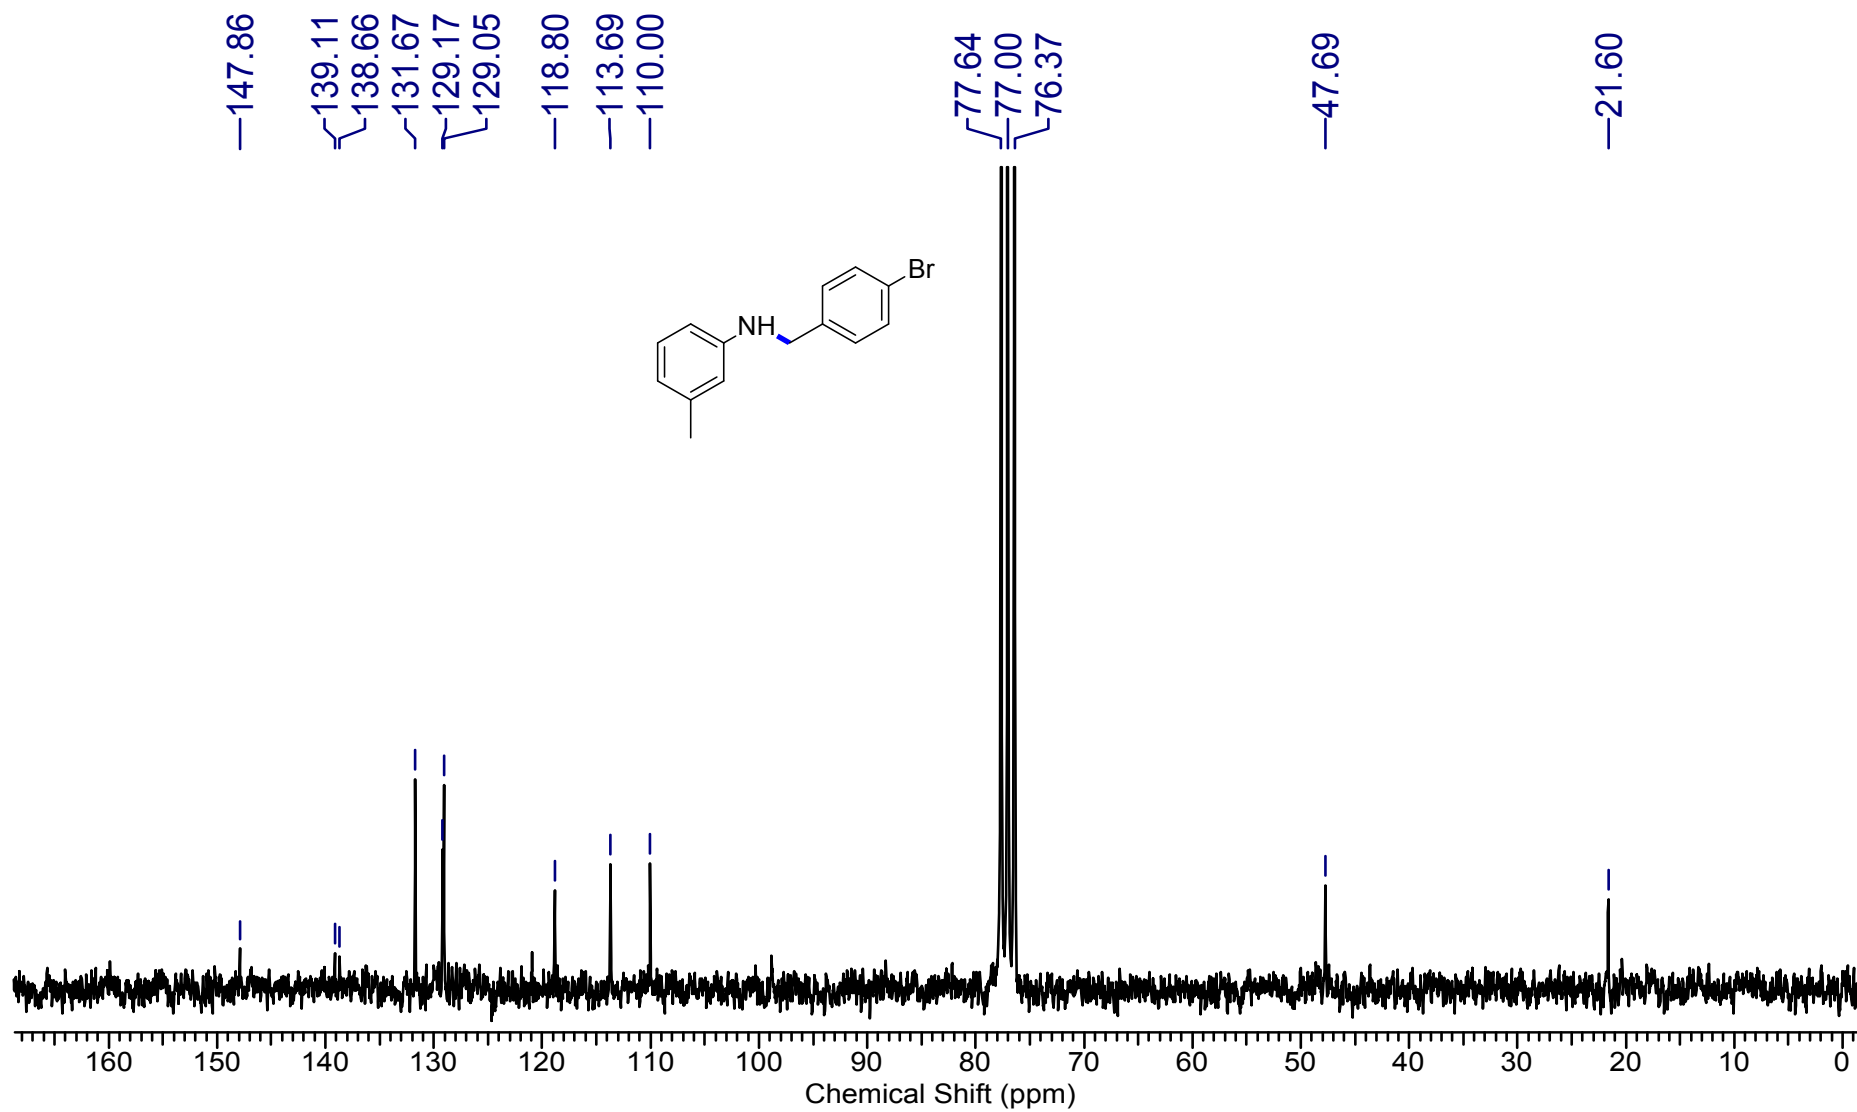

Figure S20.  $^{13}\text{C}$  of 5d

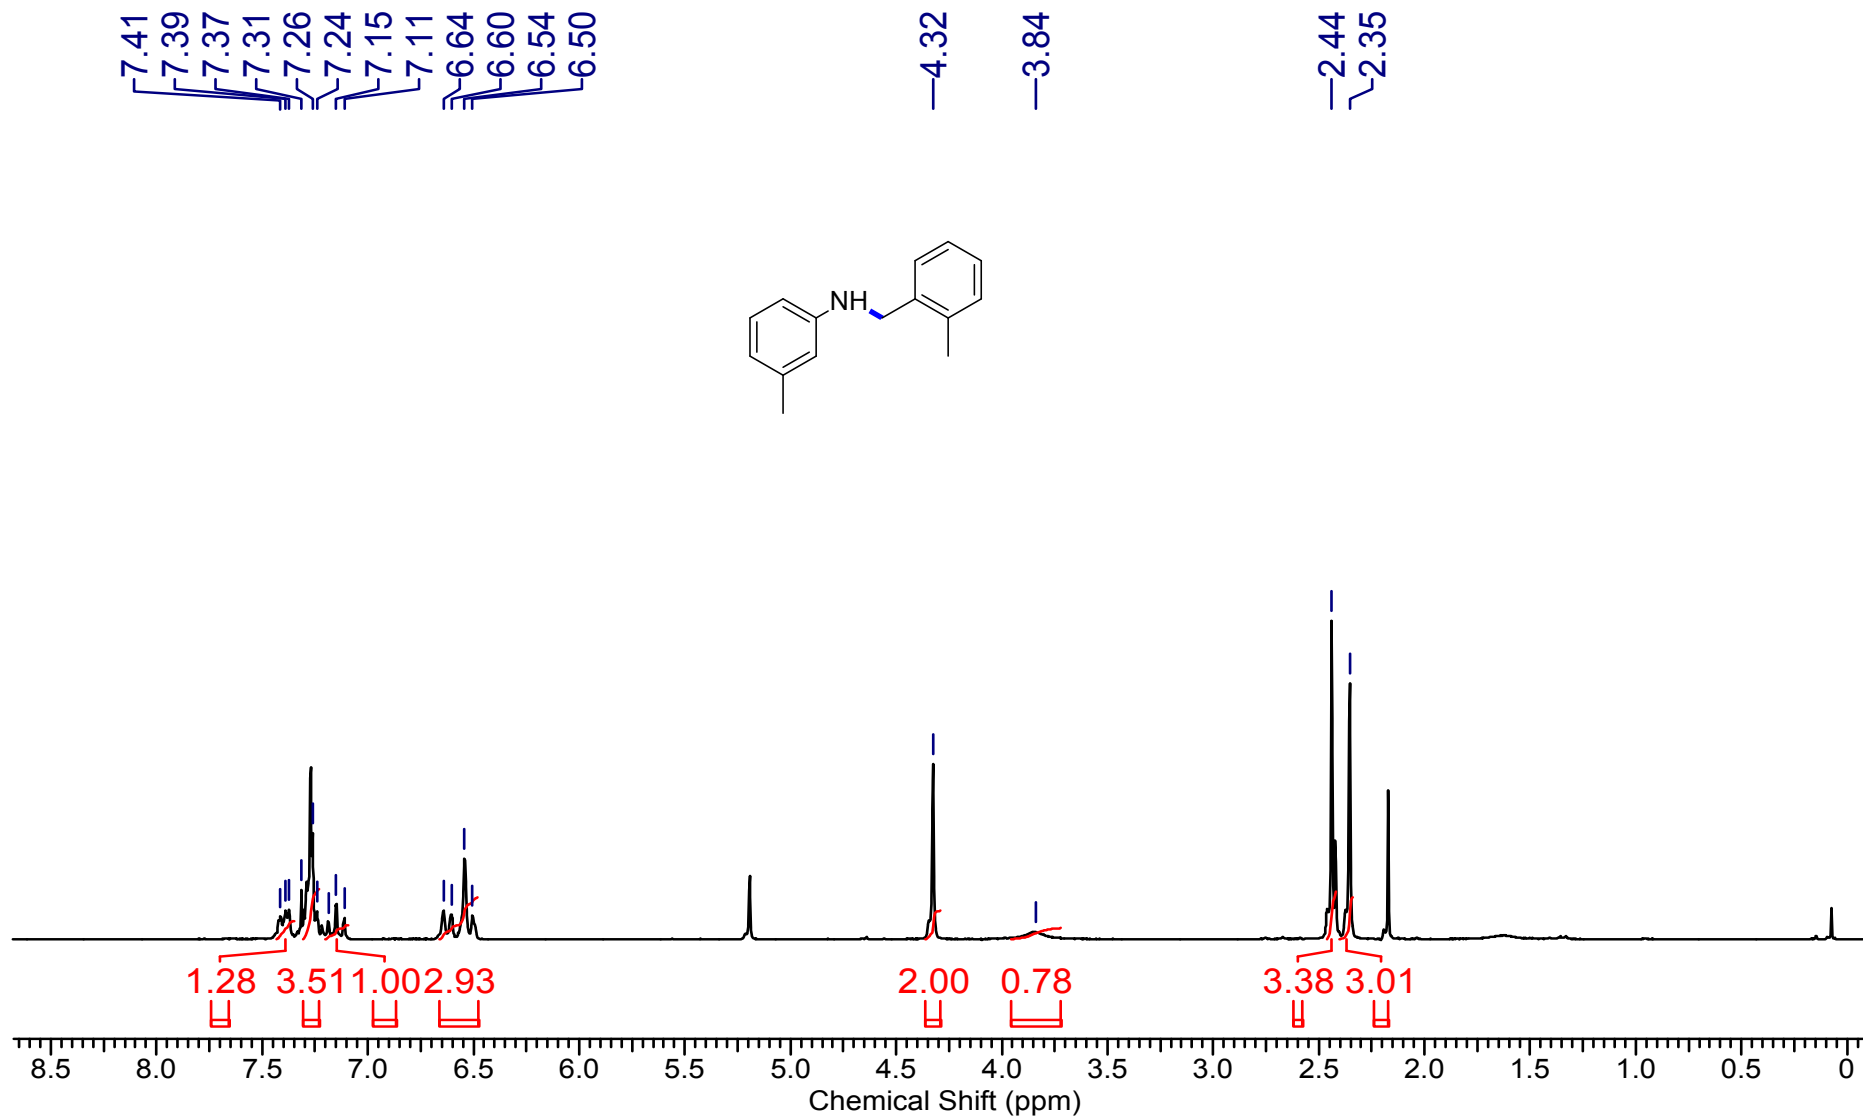

Figure S21. <sup>1</sup>H of 5e

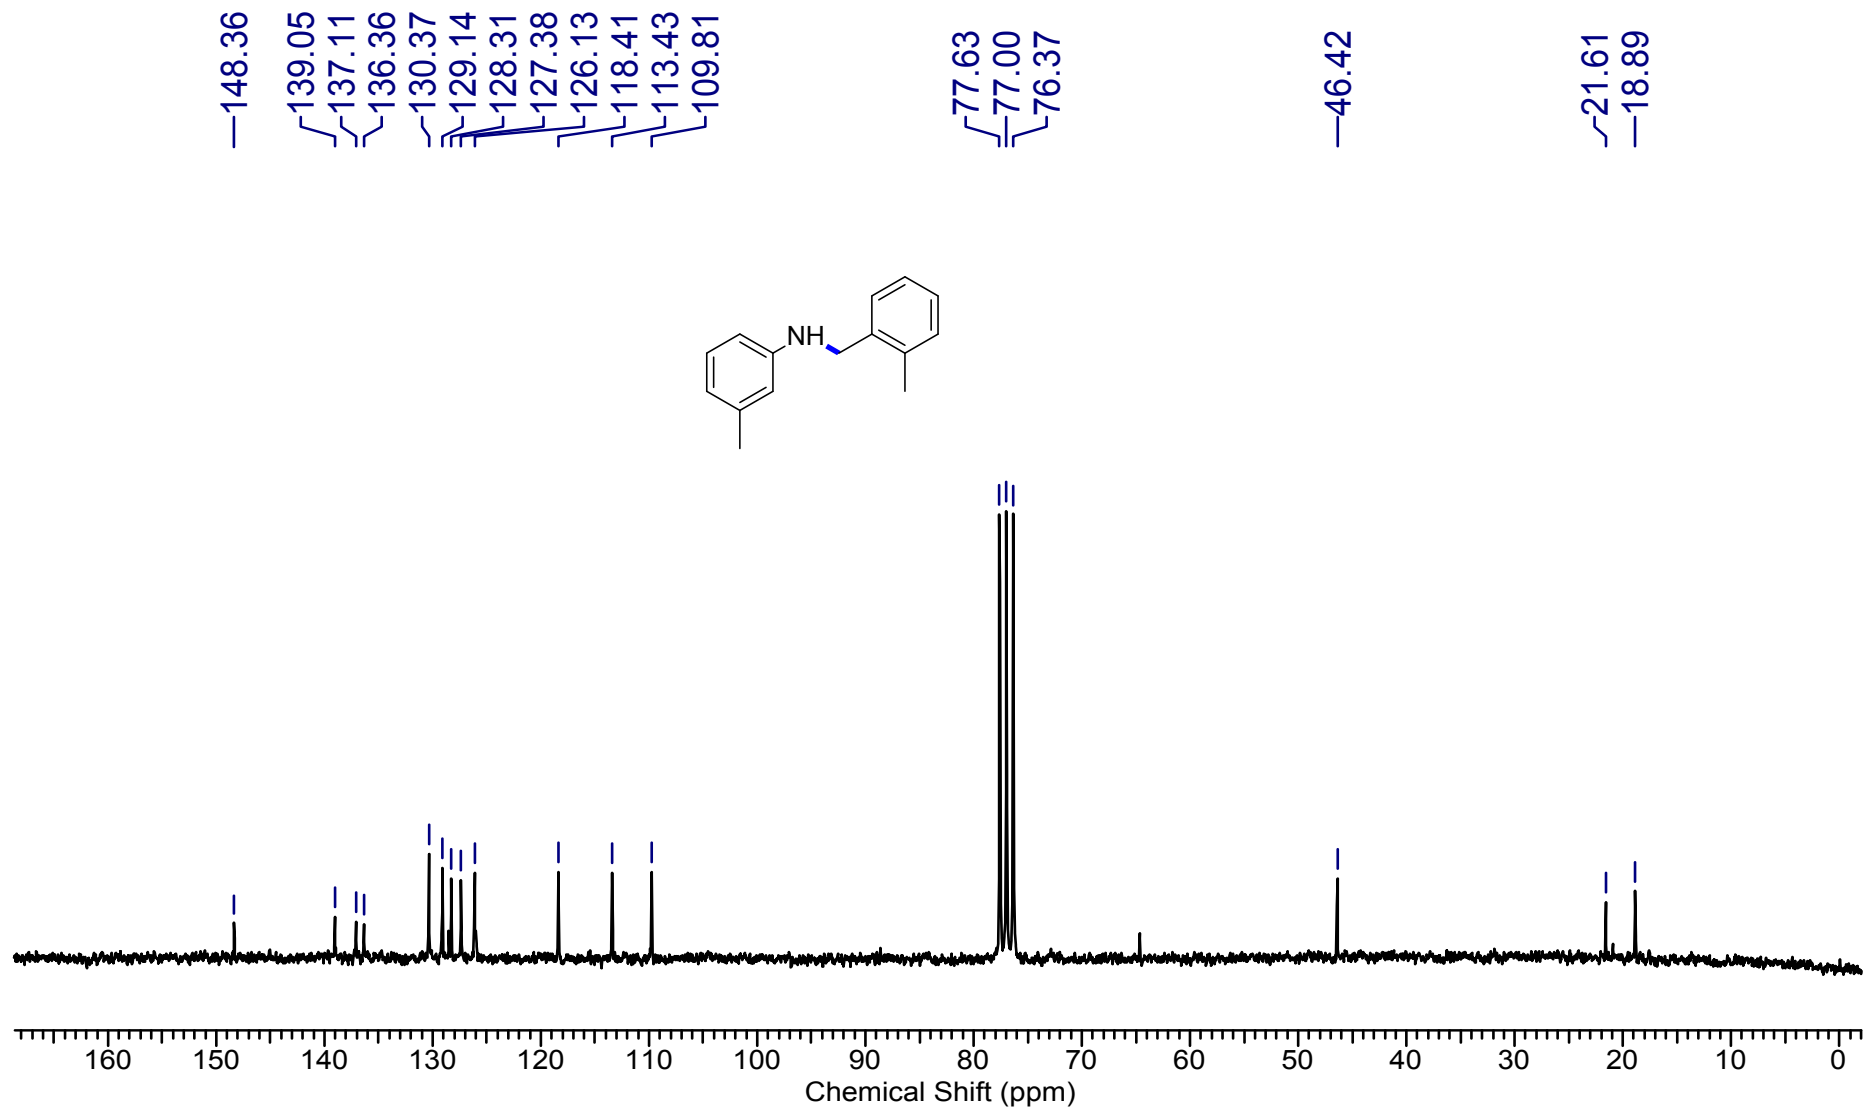

Figure S22.  $^{13}\text{C}$  of 5e

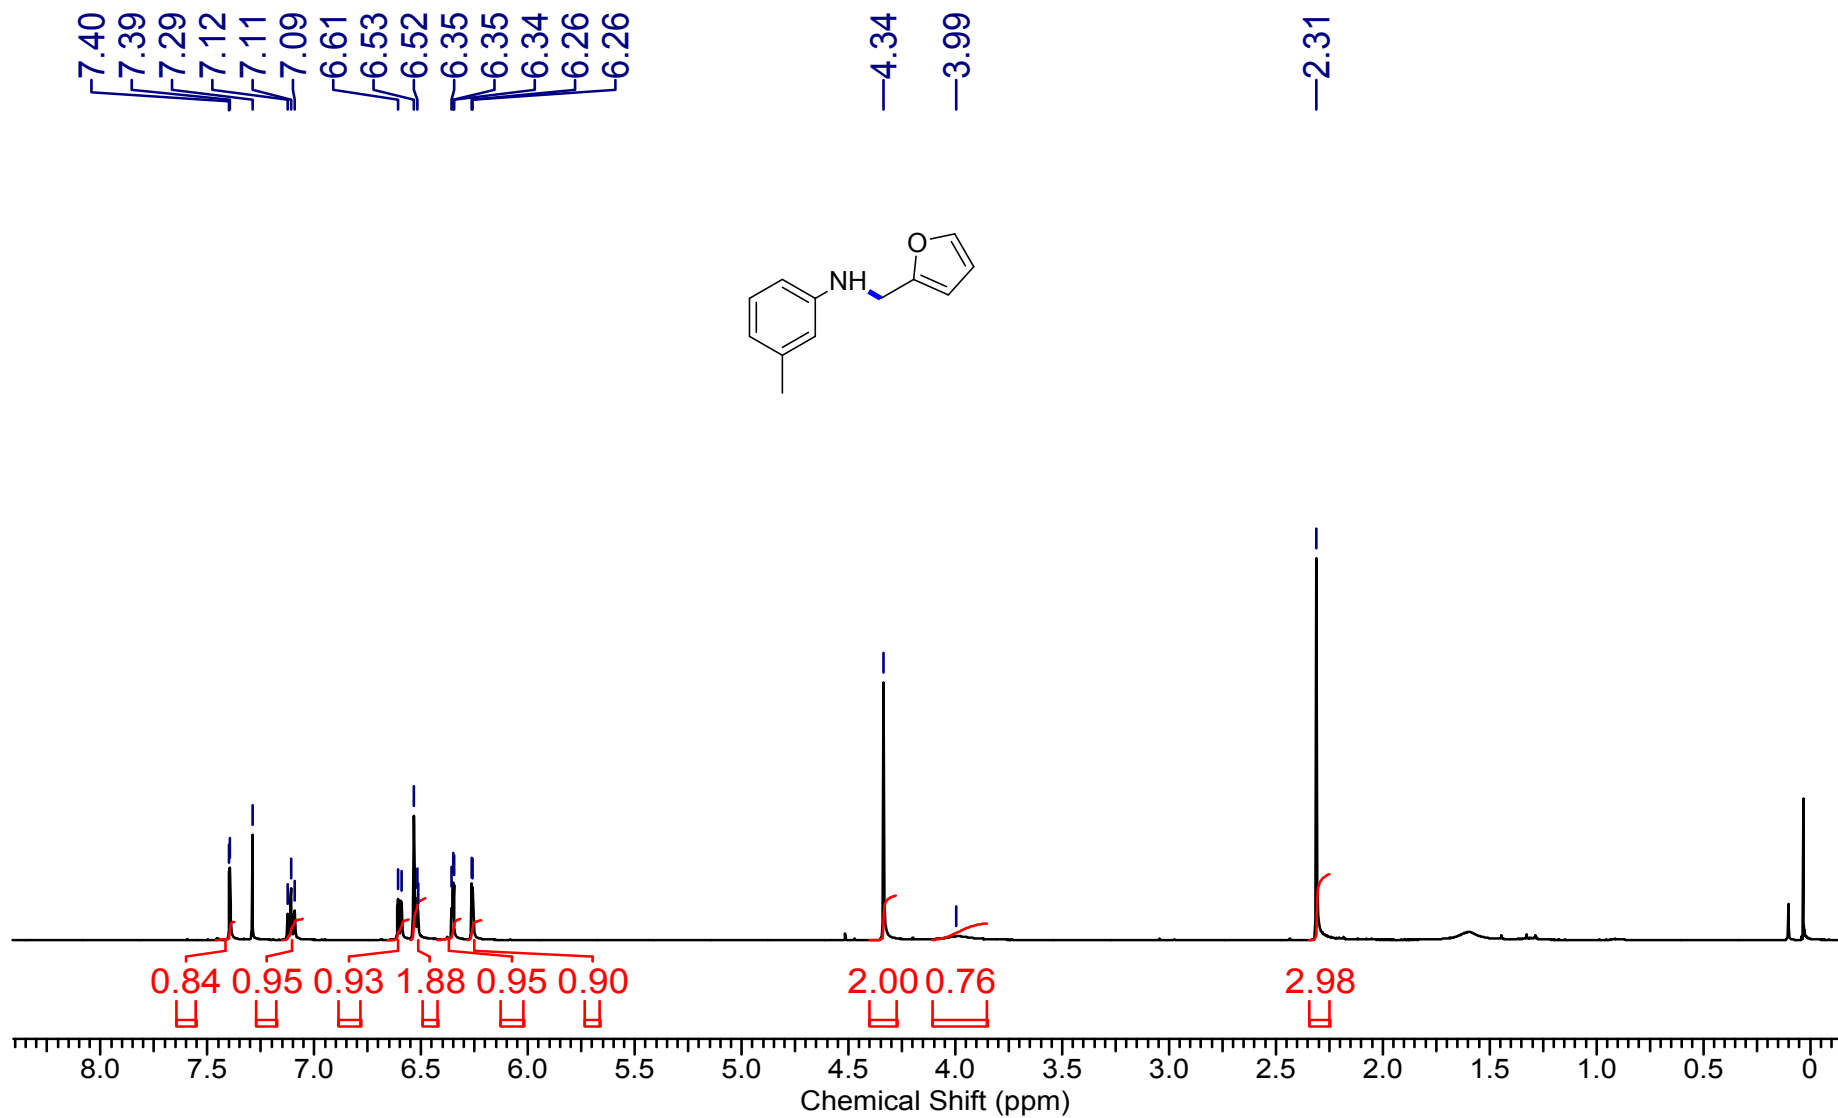

Figure S23. <sup>1</sup>H of 5f



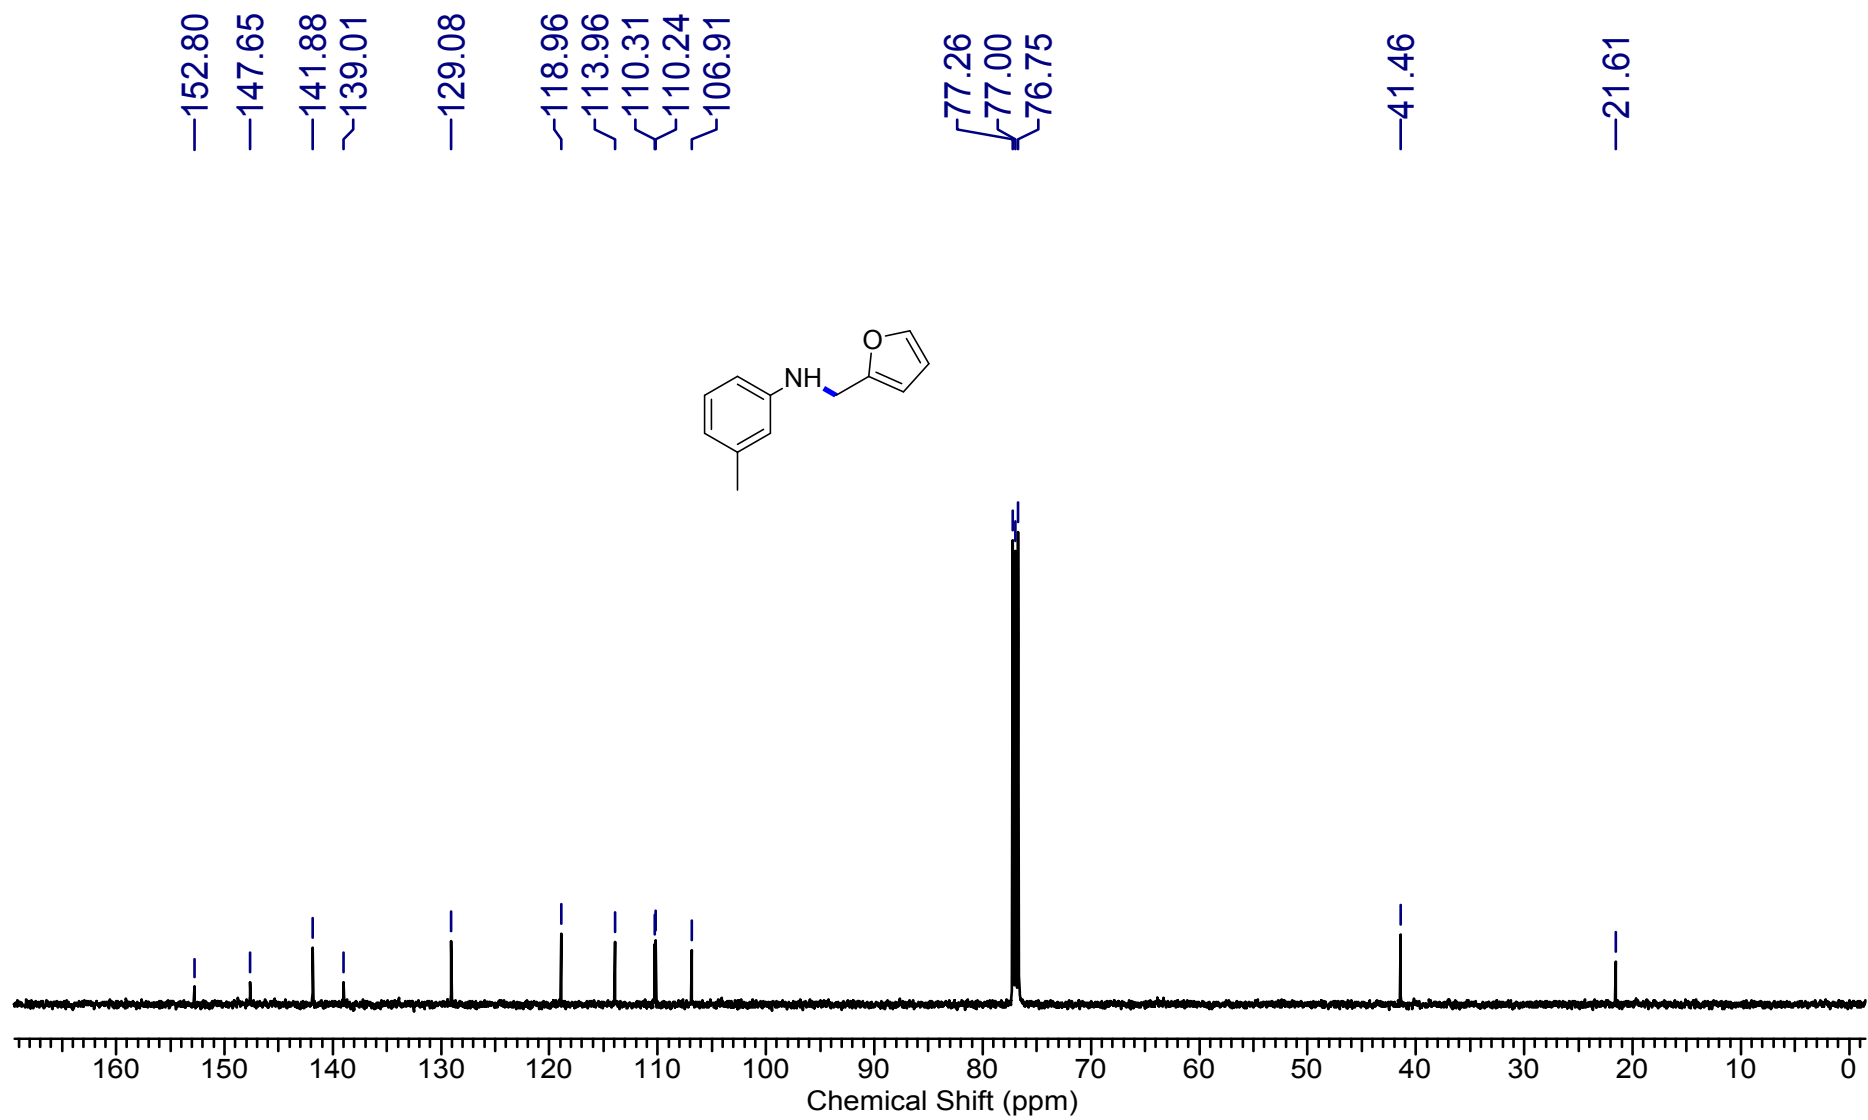

Figure S24.  $^{13}\text{C}$  of 5f

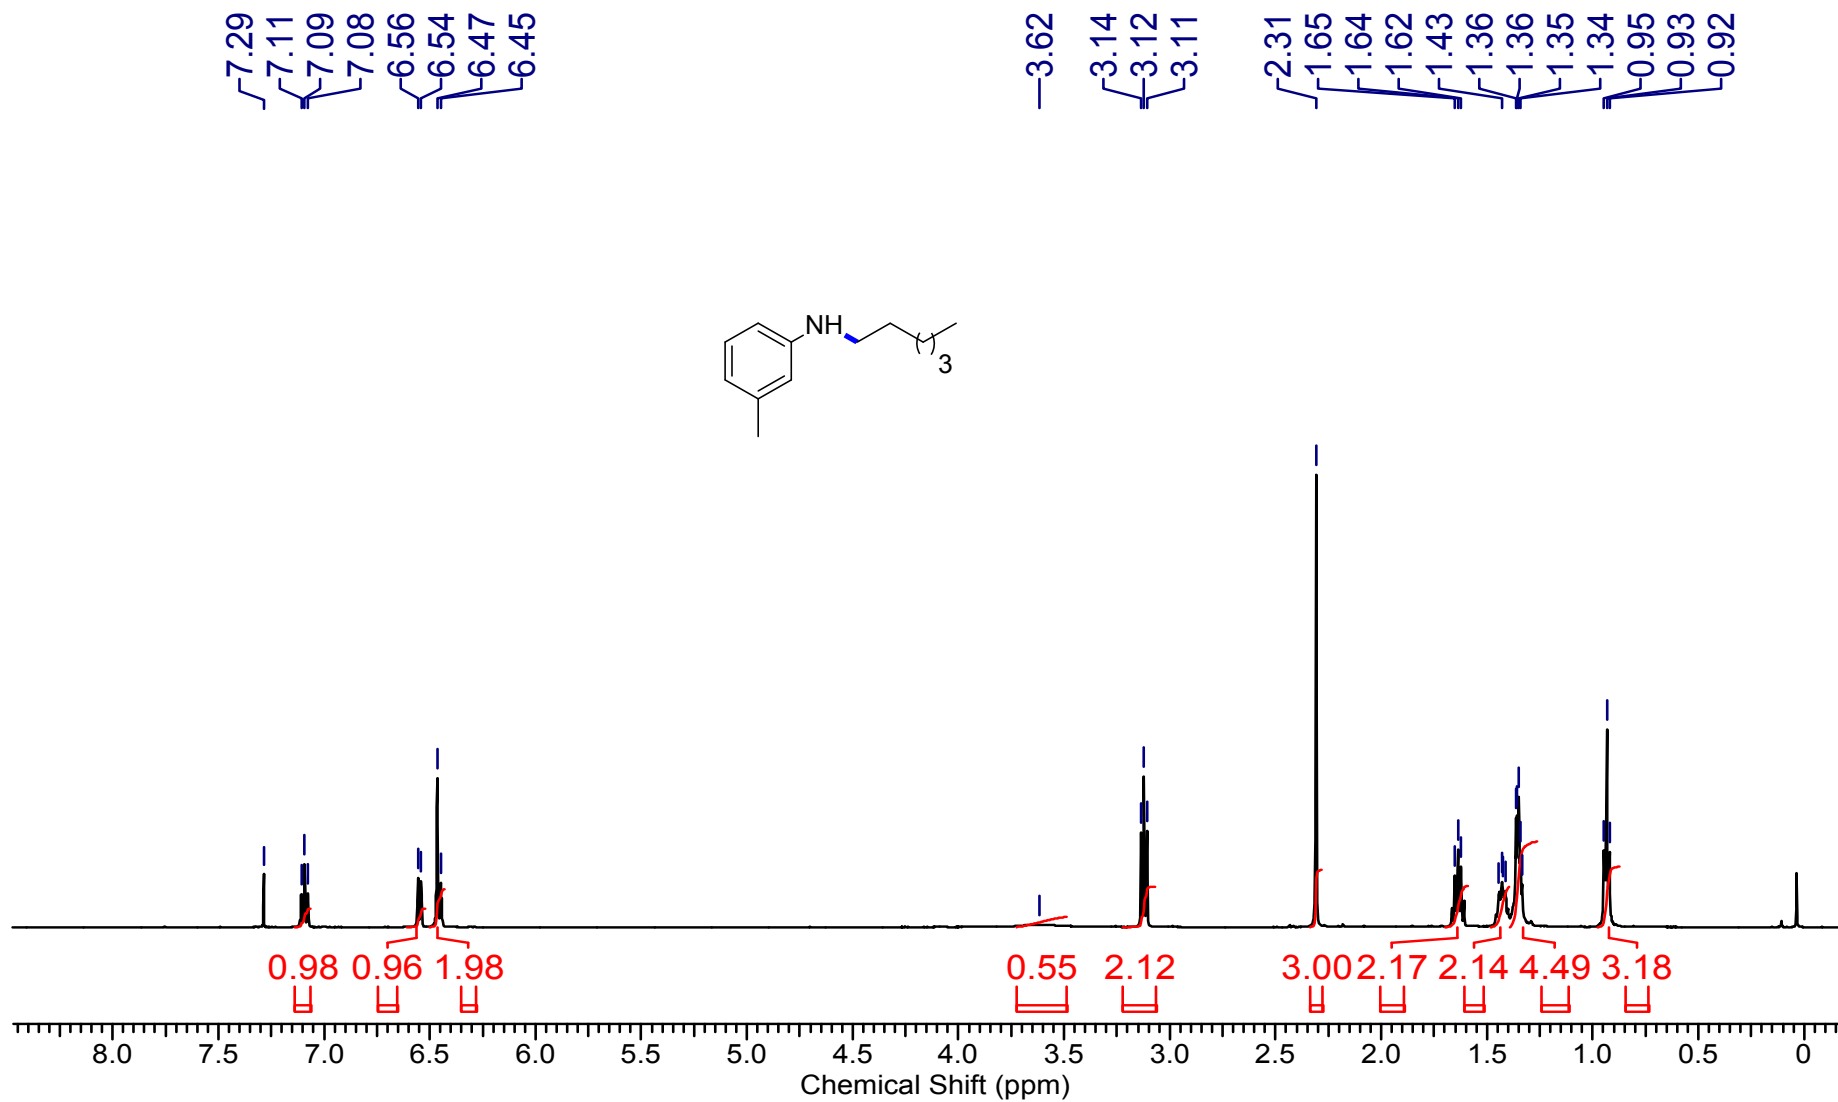

**Figure S25.**  $^1\text{H}$  of **5g**

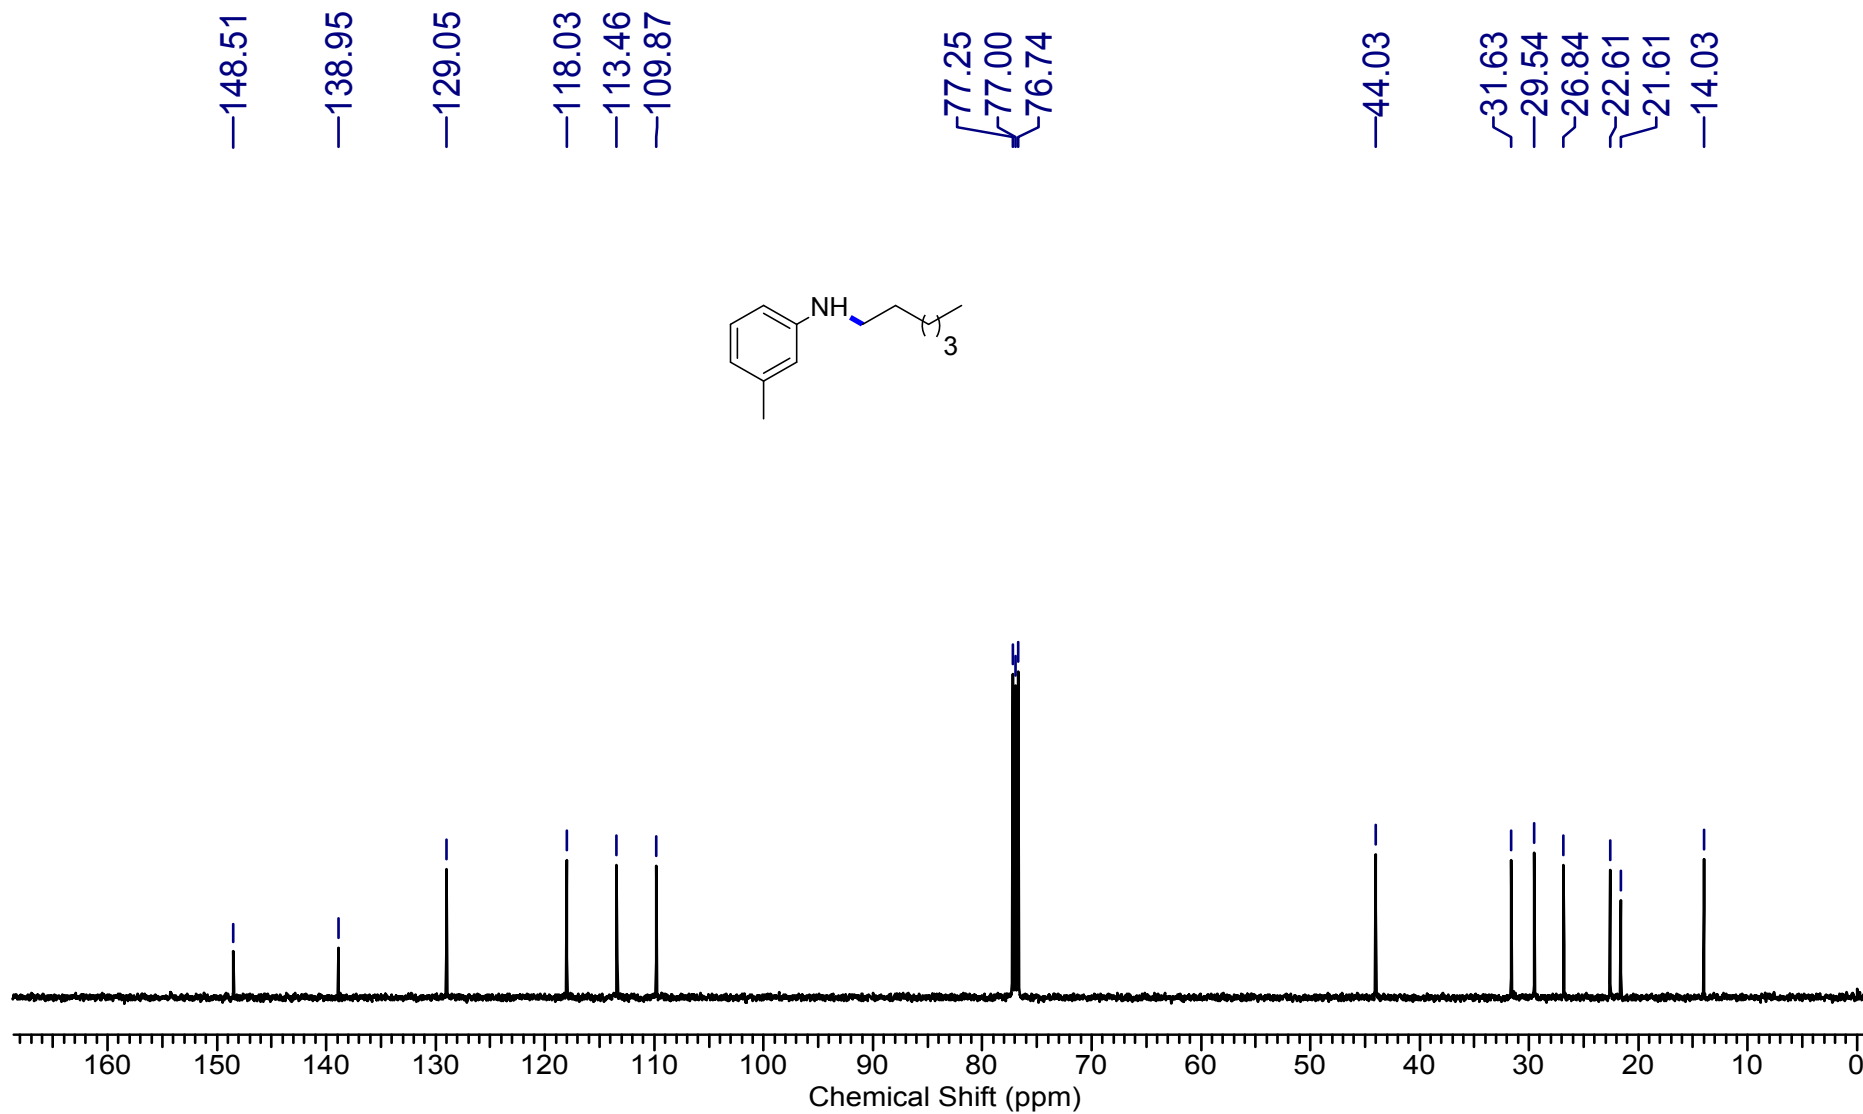

Figure S26. <sup>13</sup>C of 5g

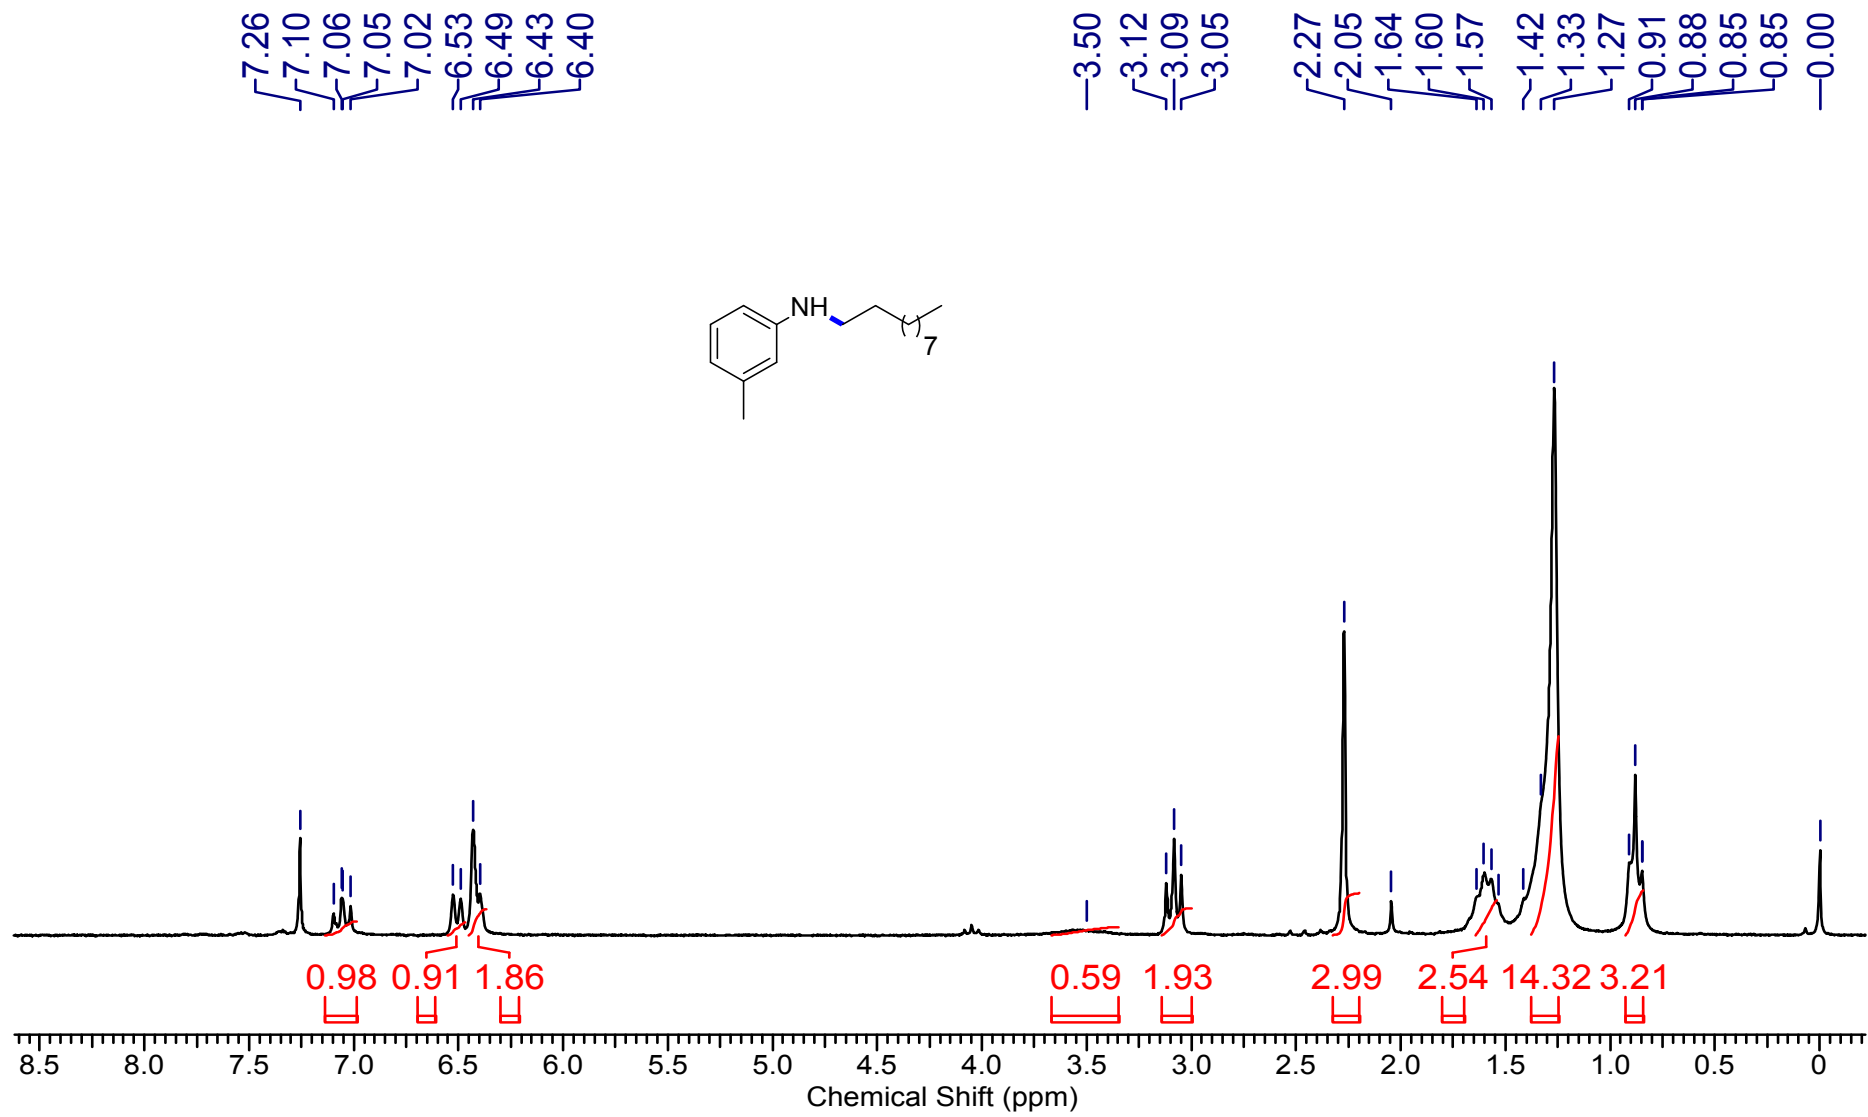

Figure S27.  $^1\text{H}$  of 5h

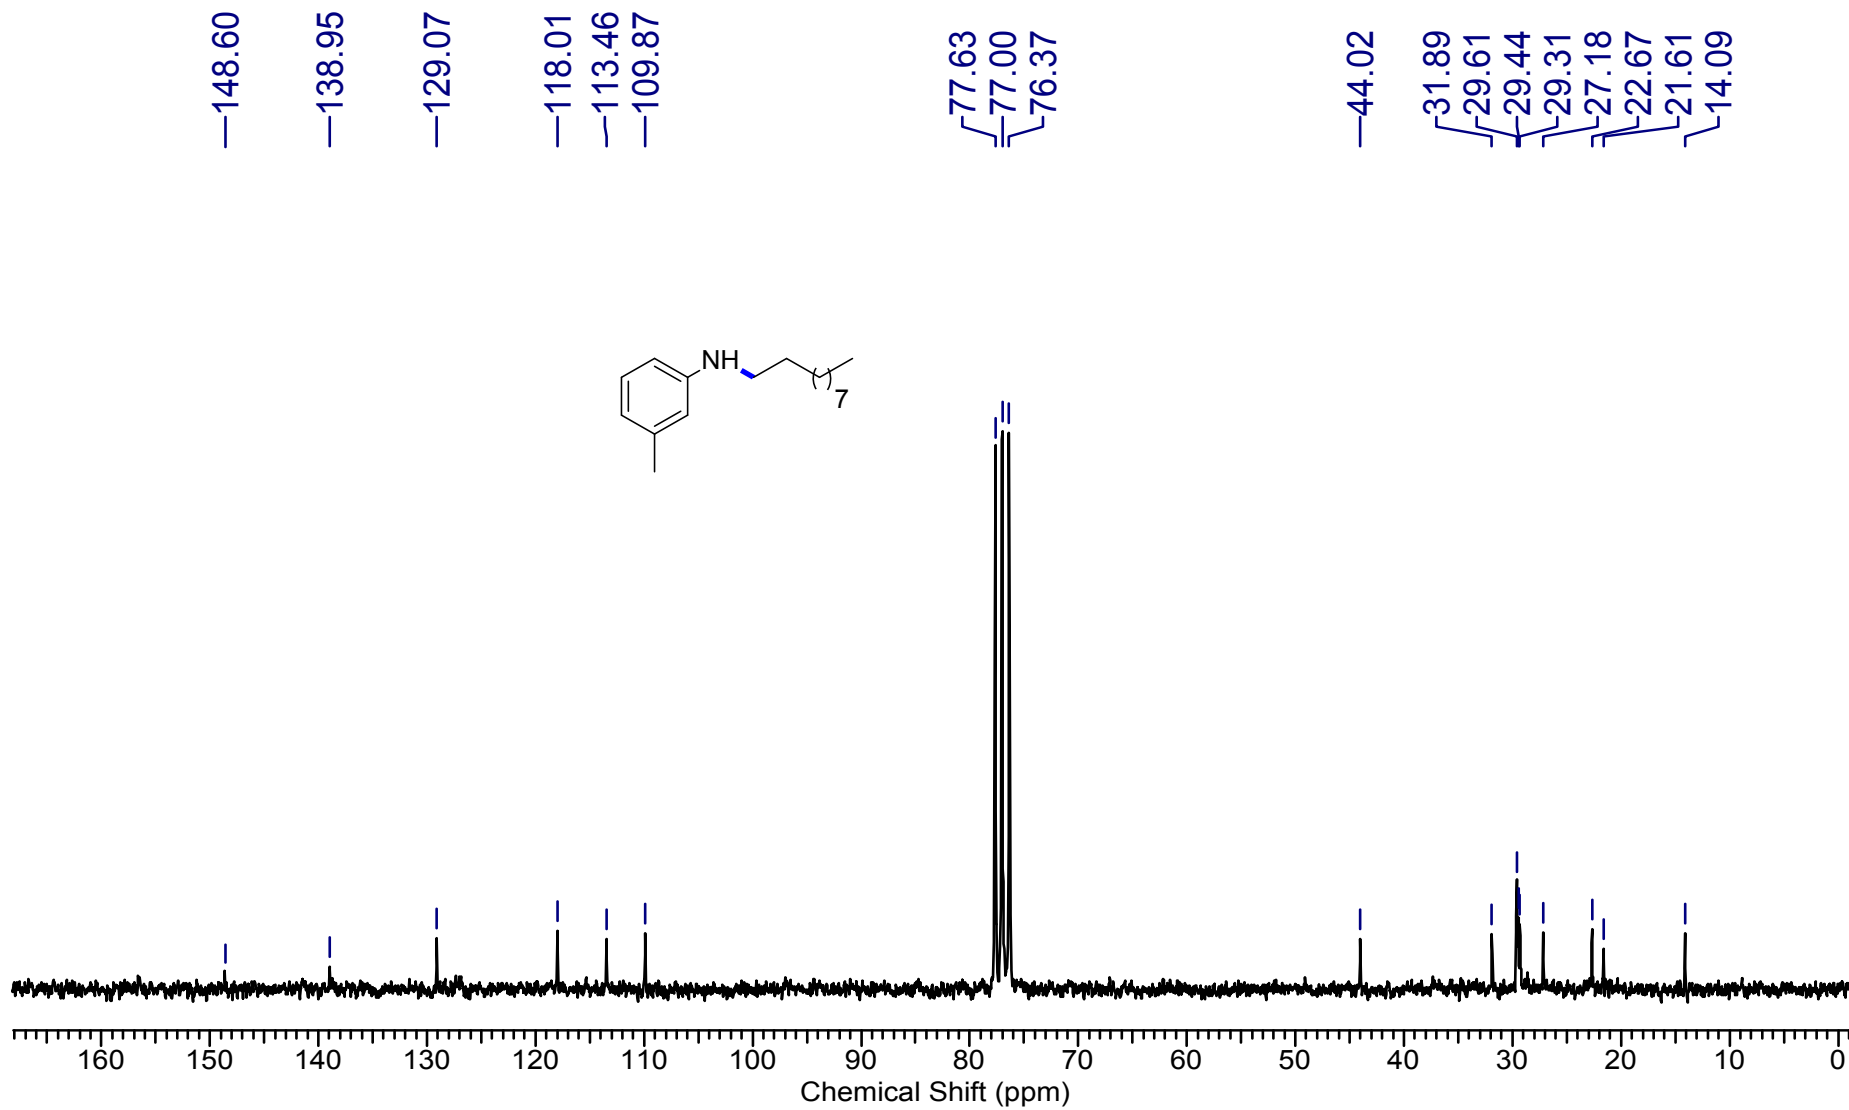

Figure S28.  $^{13}\text{C}$  of 5h

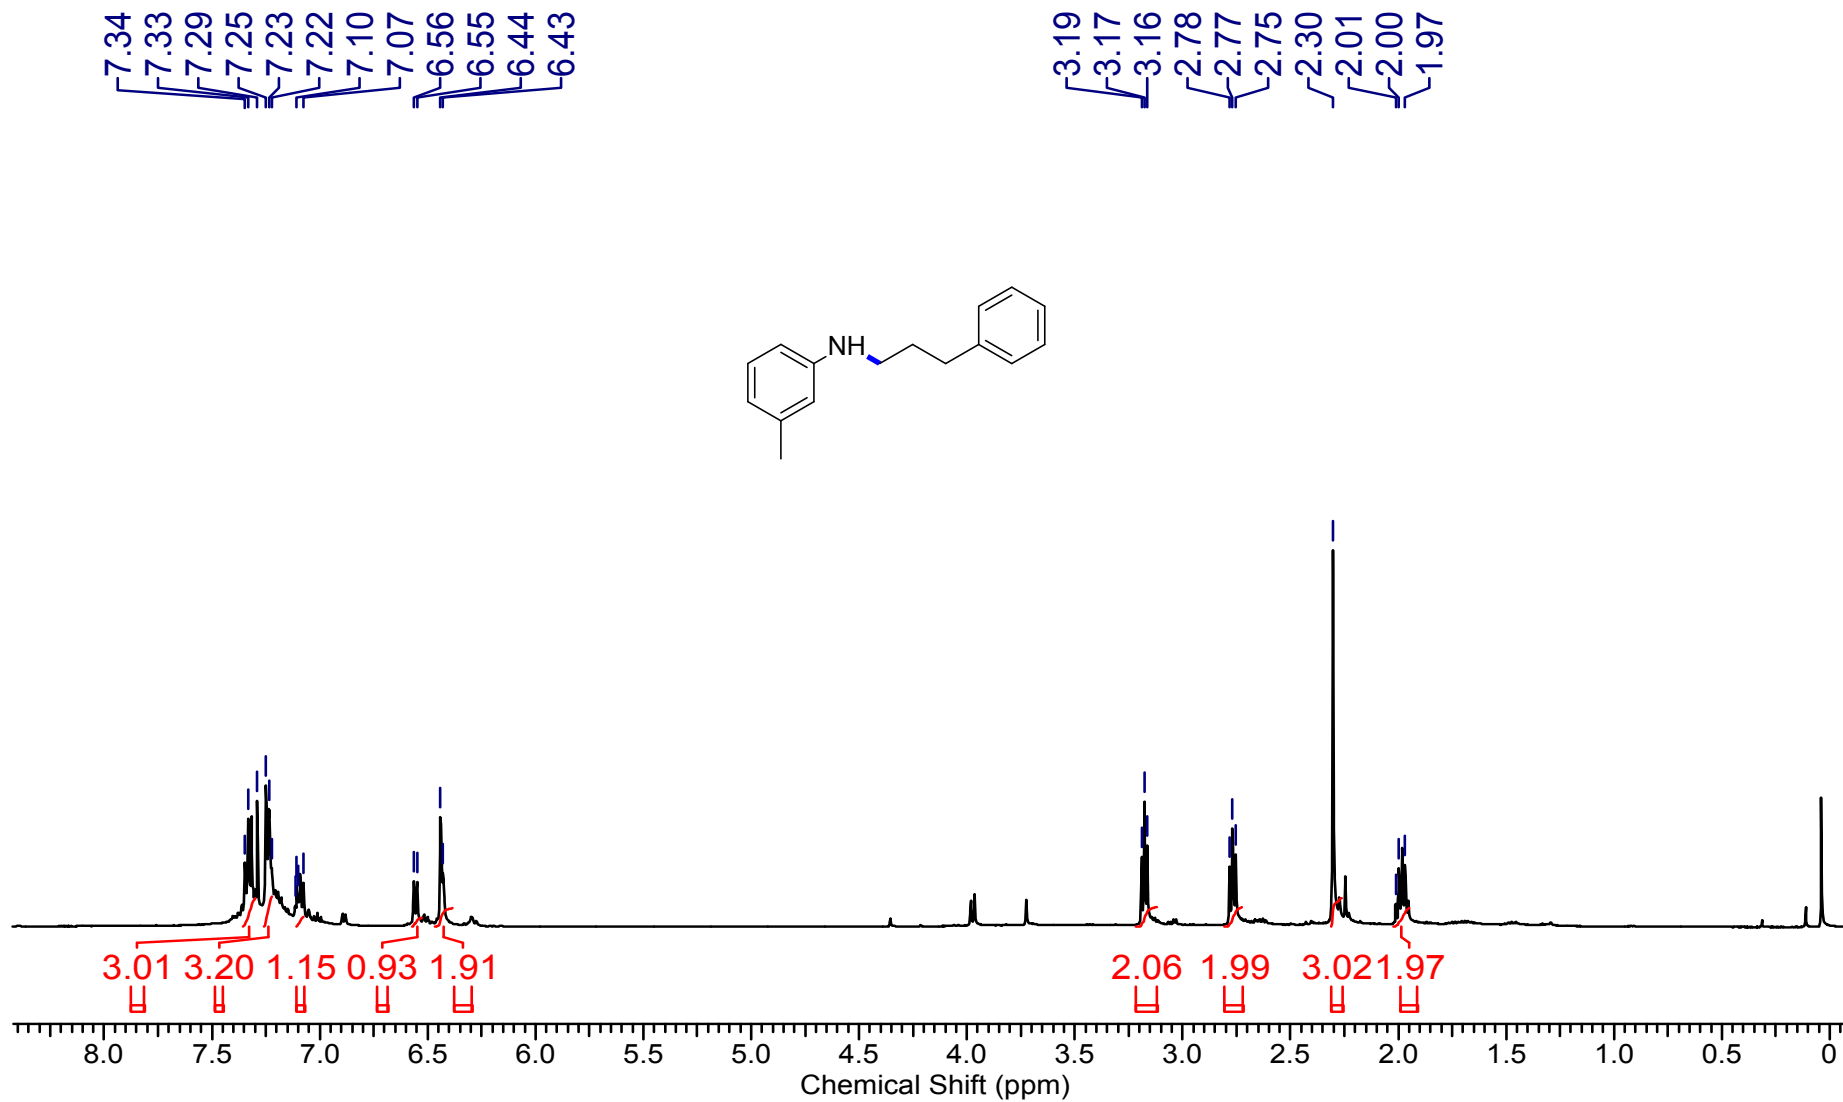

Figure S29. <sup>1</sup>H of 5i

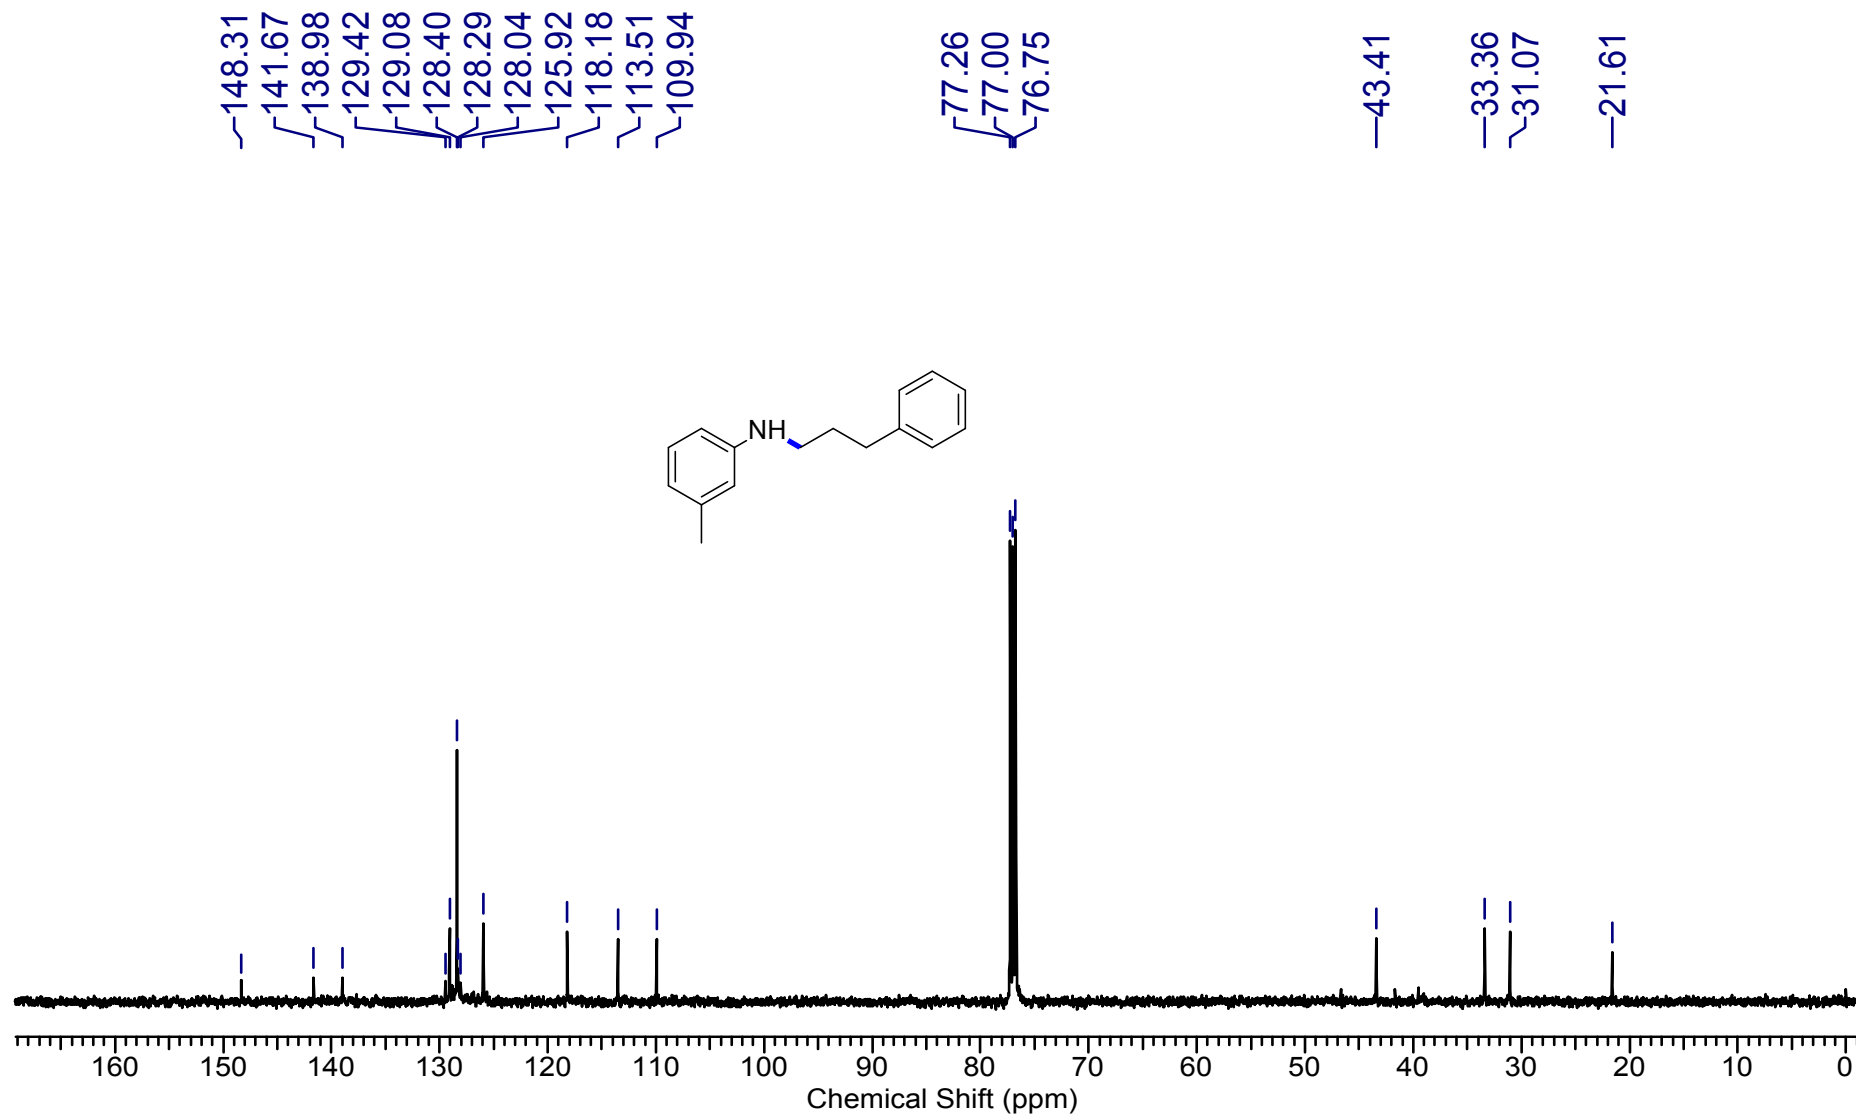

Figure S30.  $^{13}\text{C}$  of 5i



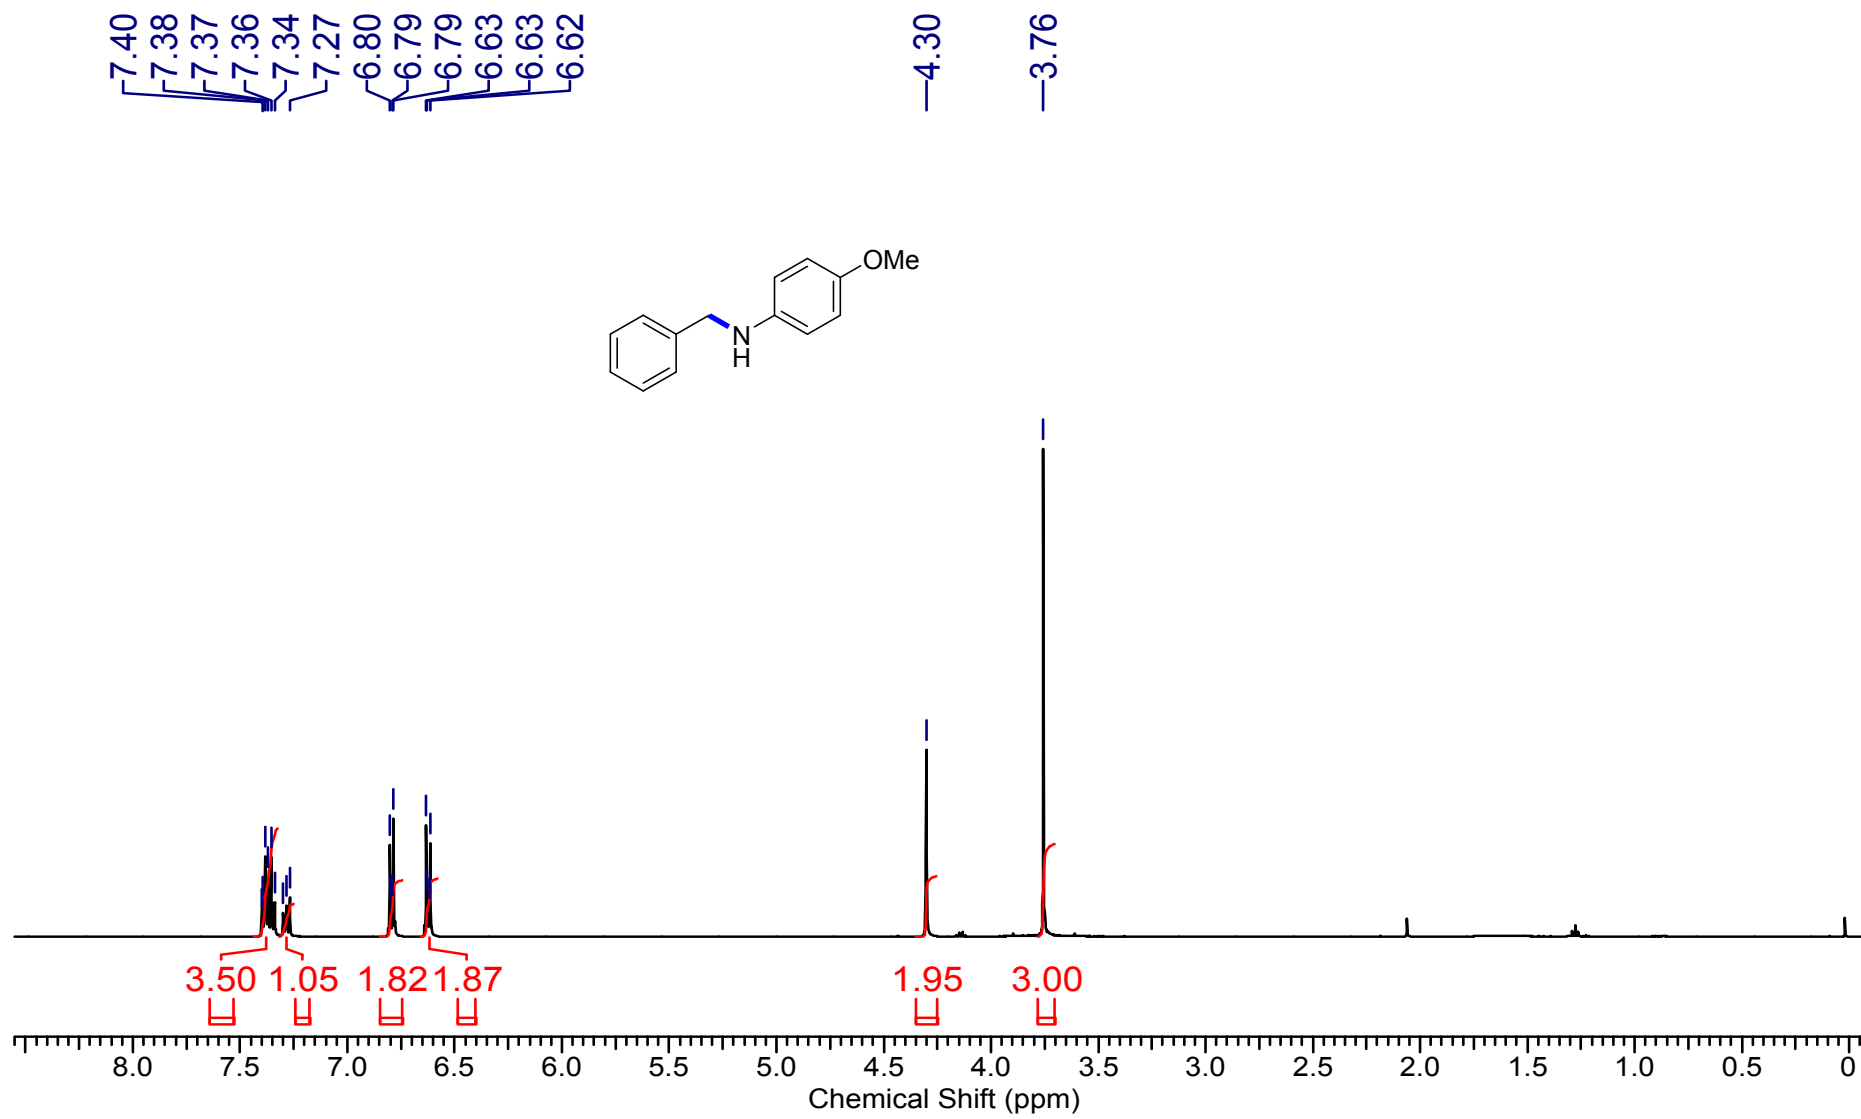

Figure S31.  $^1\text{H}$  of 6a

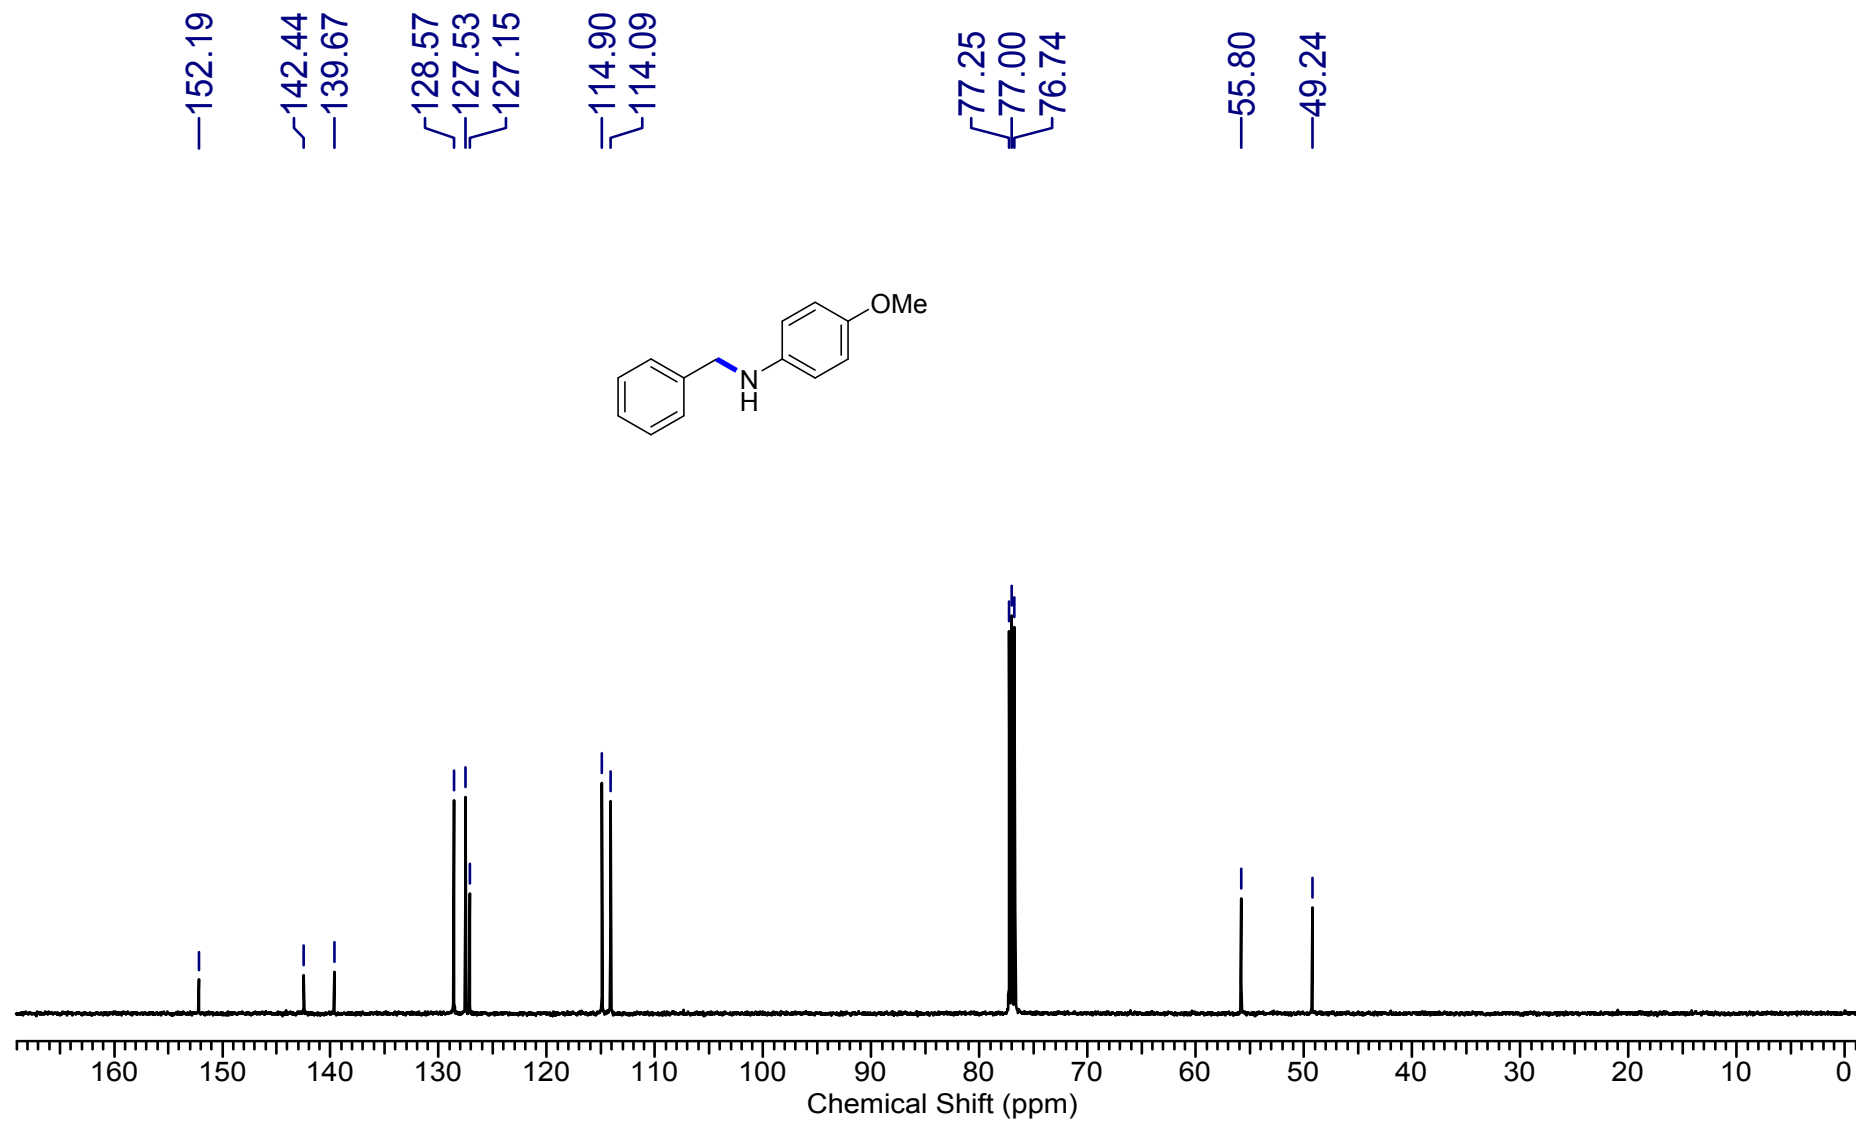

Figure S32.  $^{13}\text{C}$  of 6a

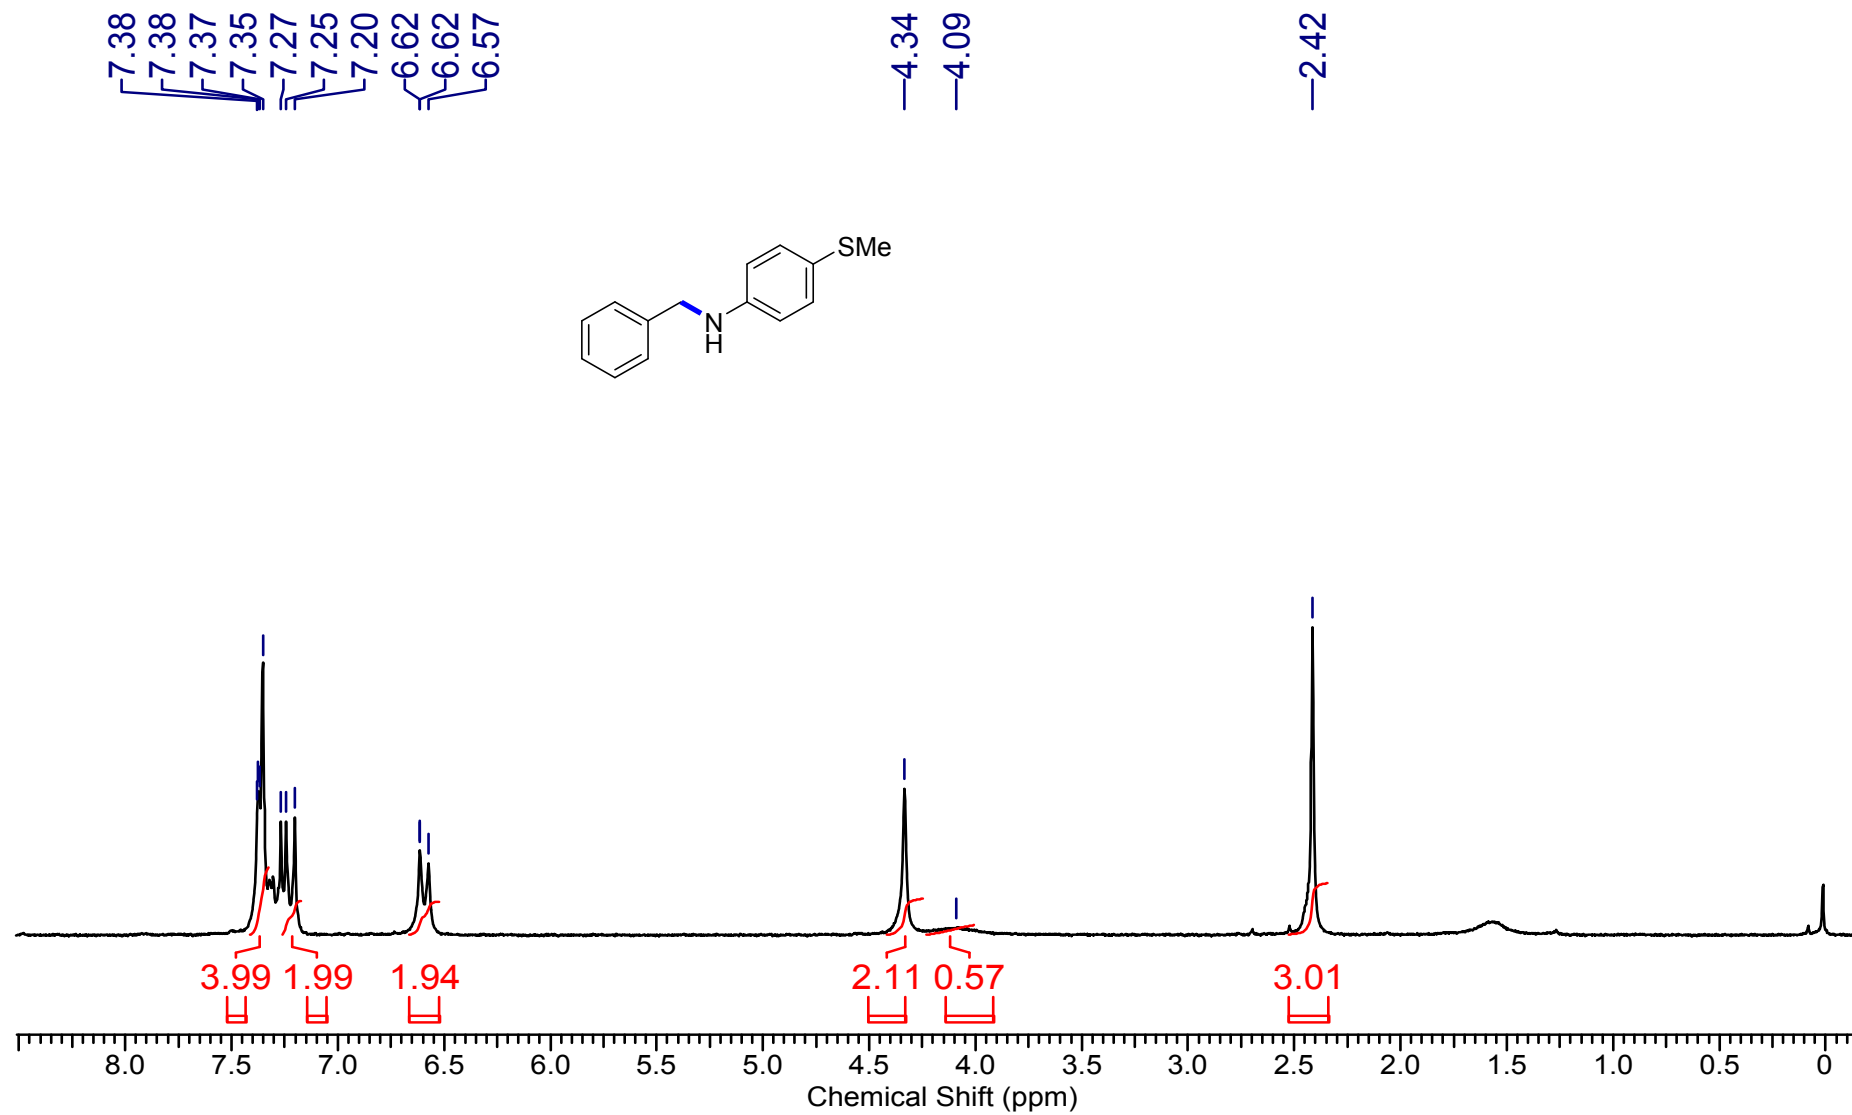

Figure S33. <sup>1</sup>H of **6b**

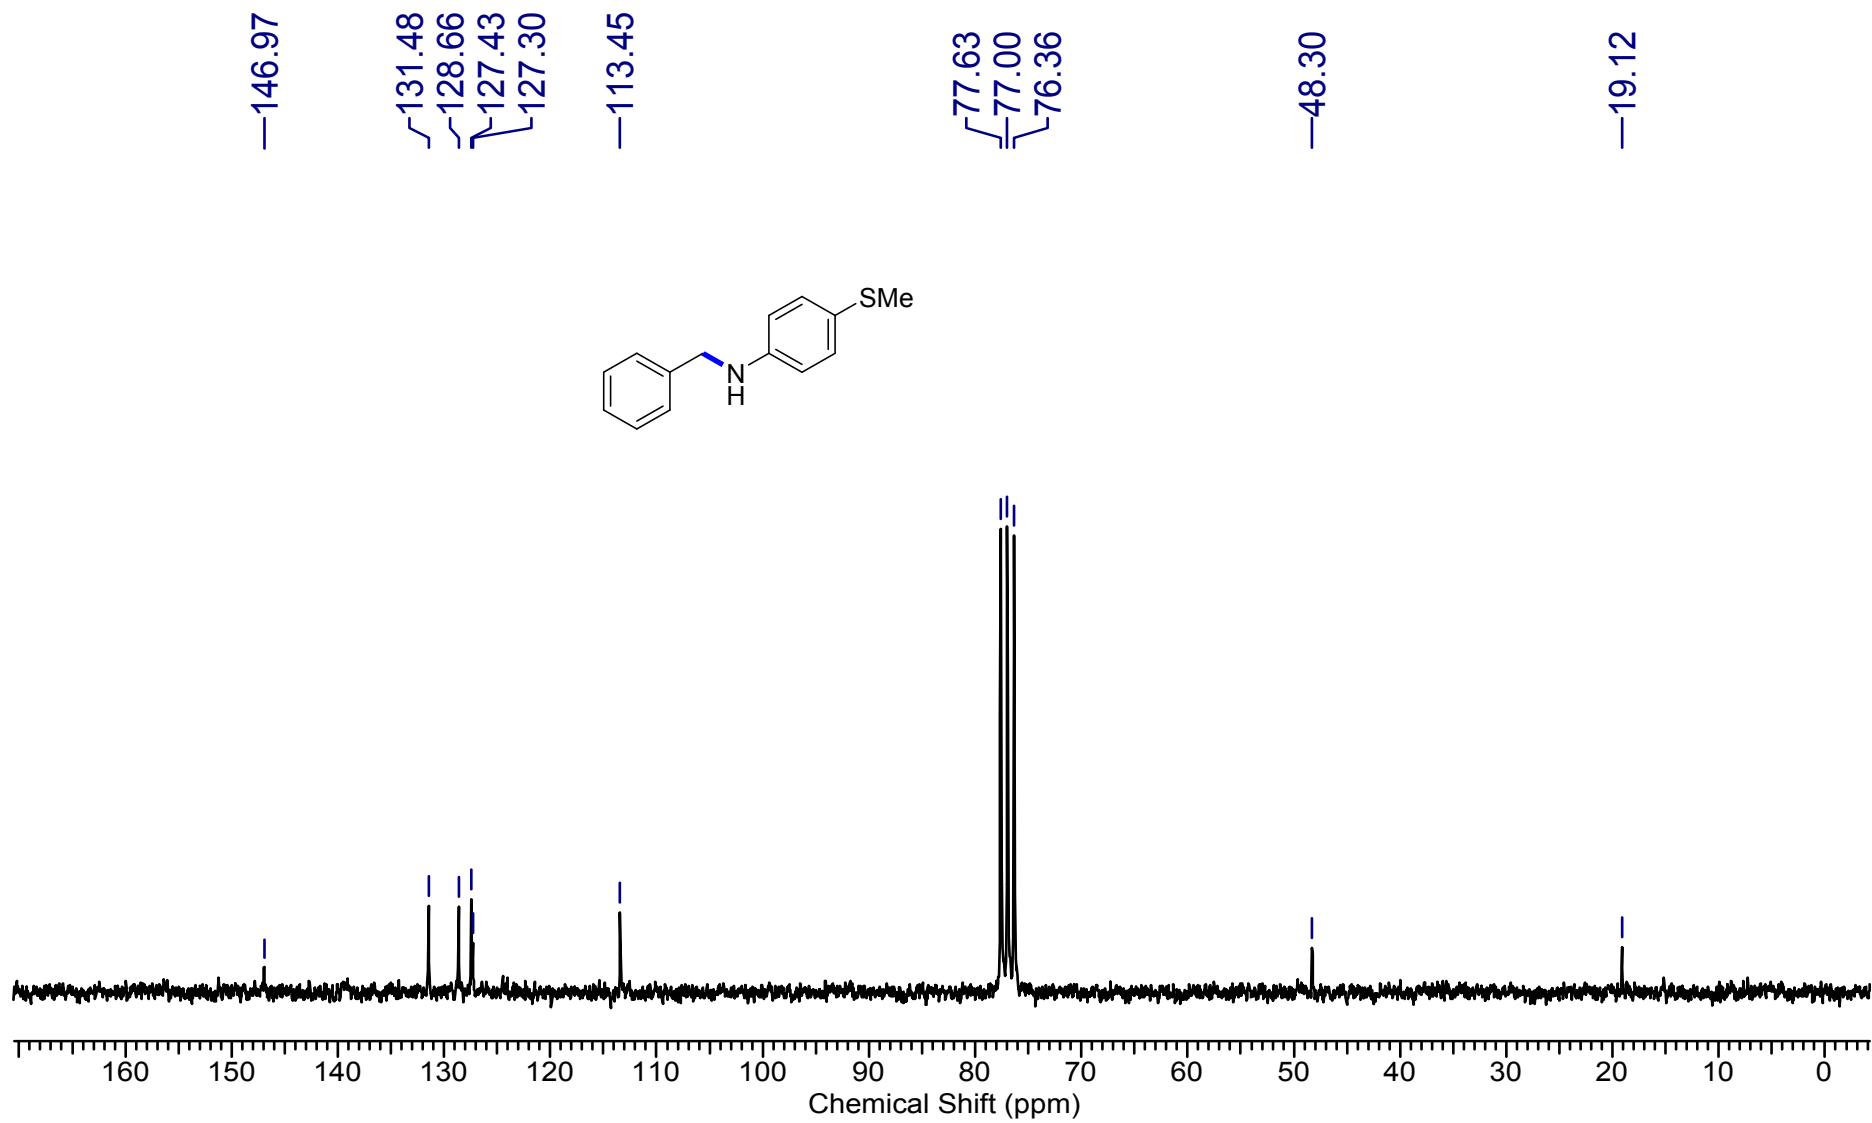

Figure S34. <sup>13</sup>C of 6b

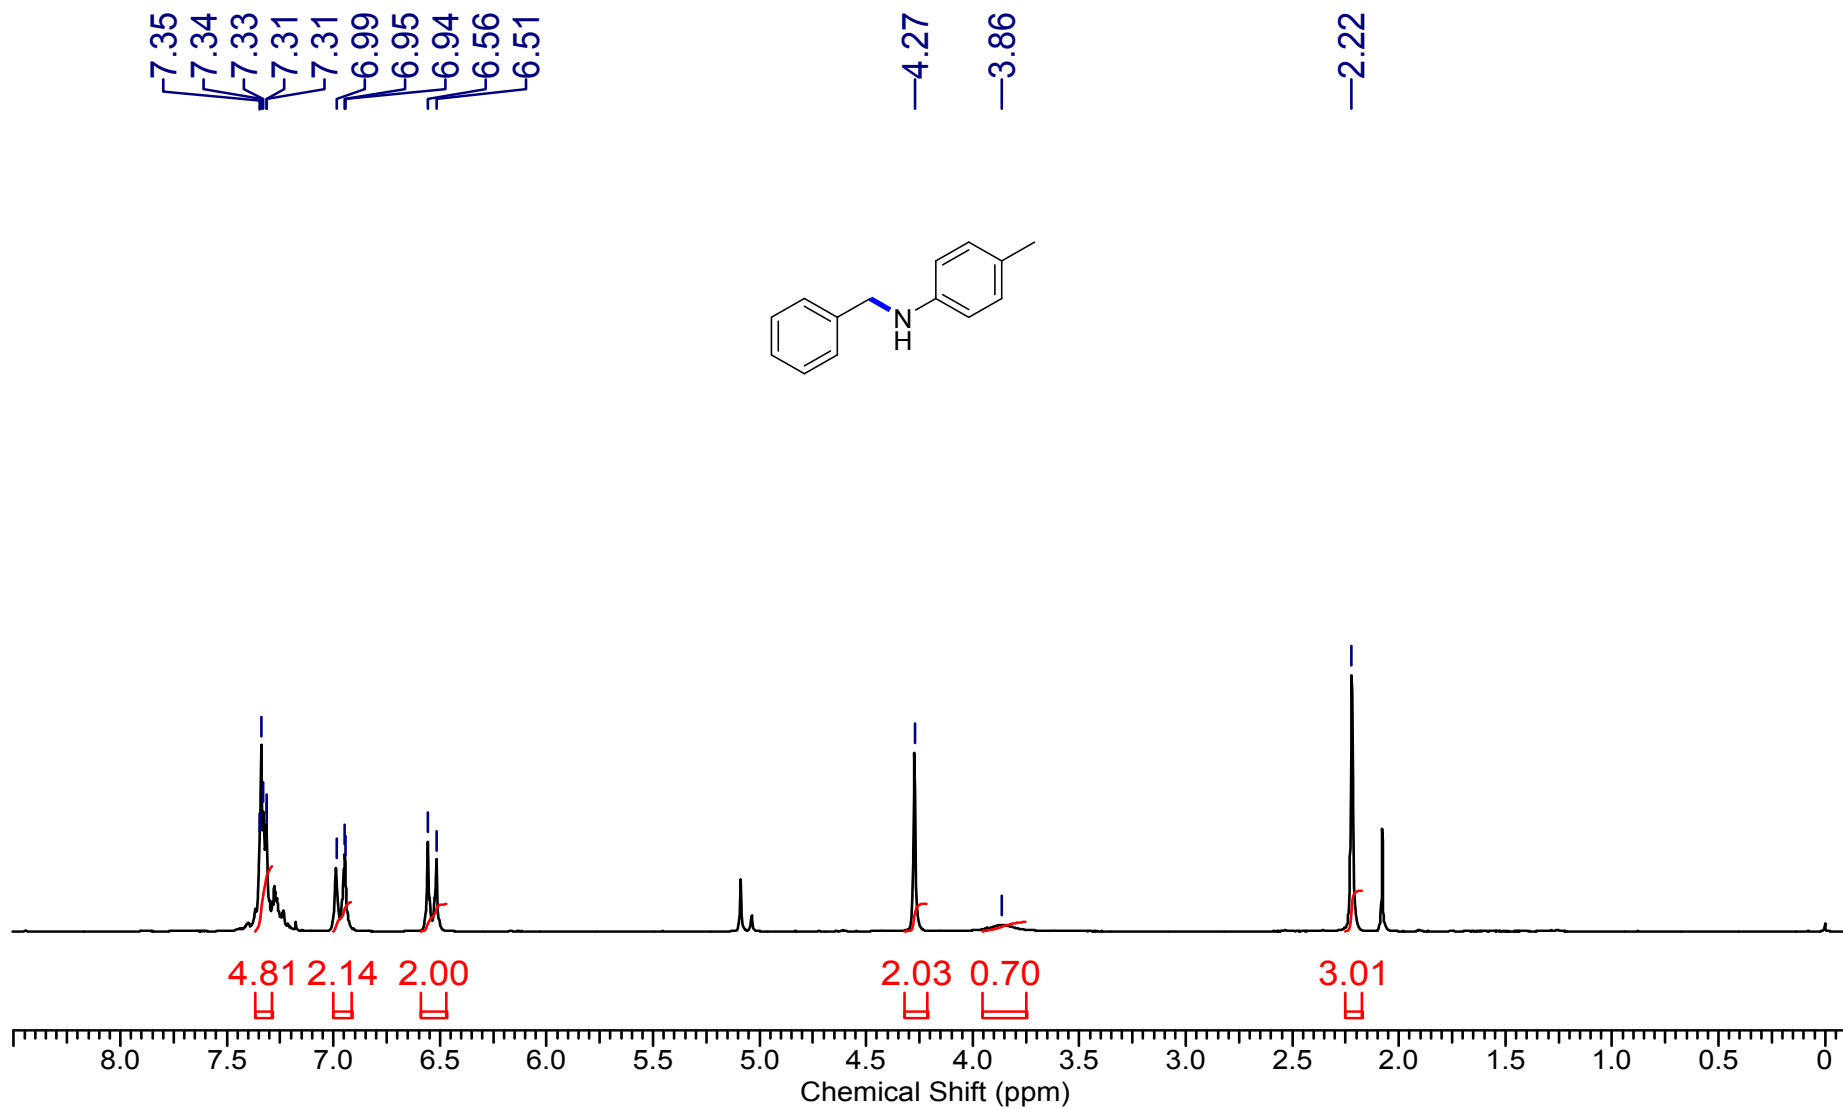

Figure S35.  $^1\text{H}$  of **6c**

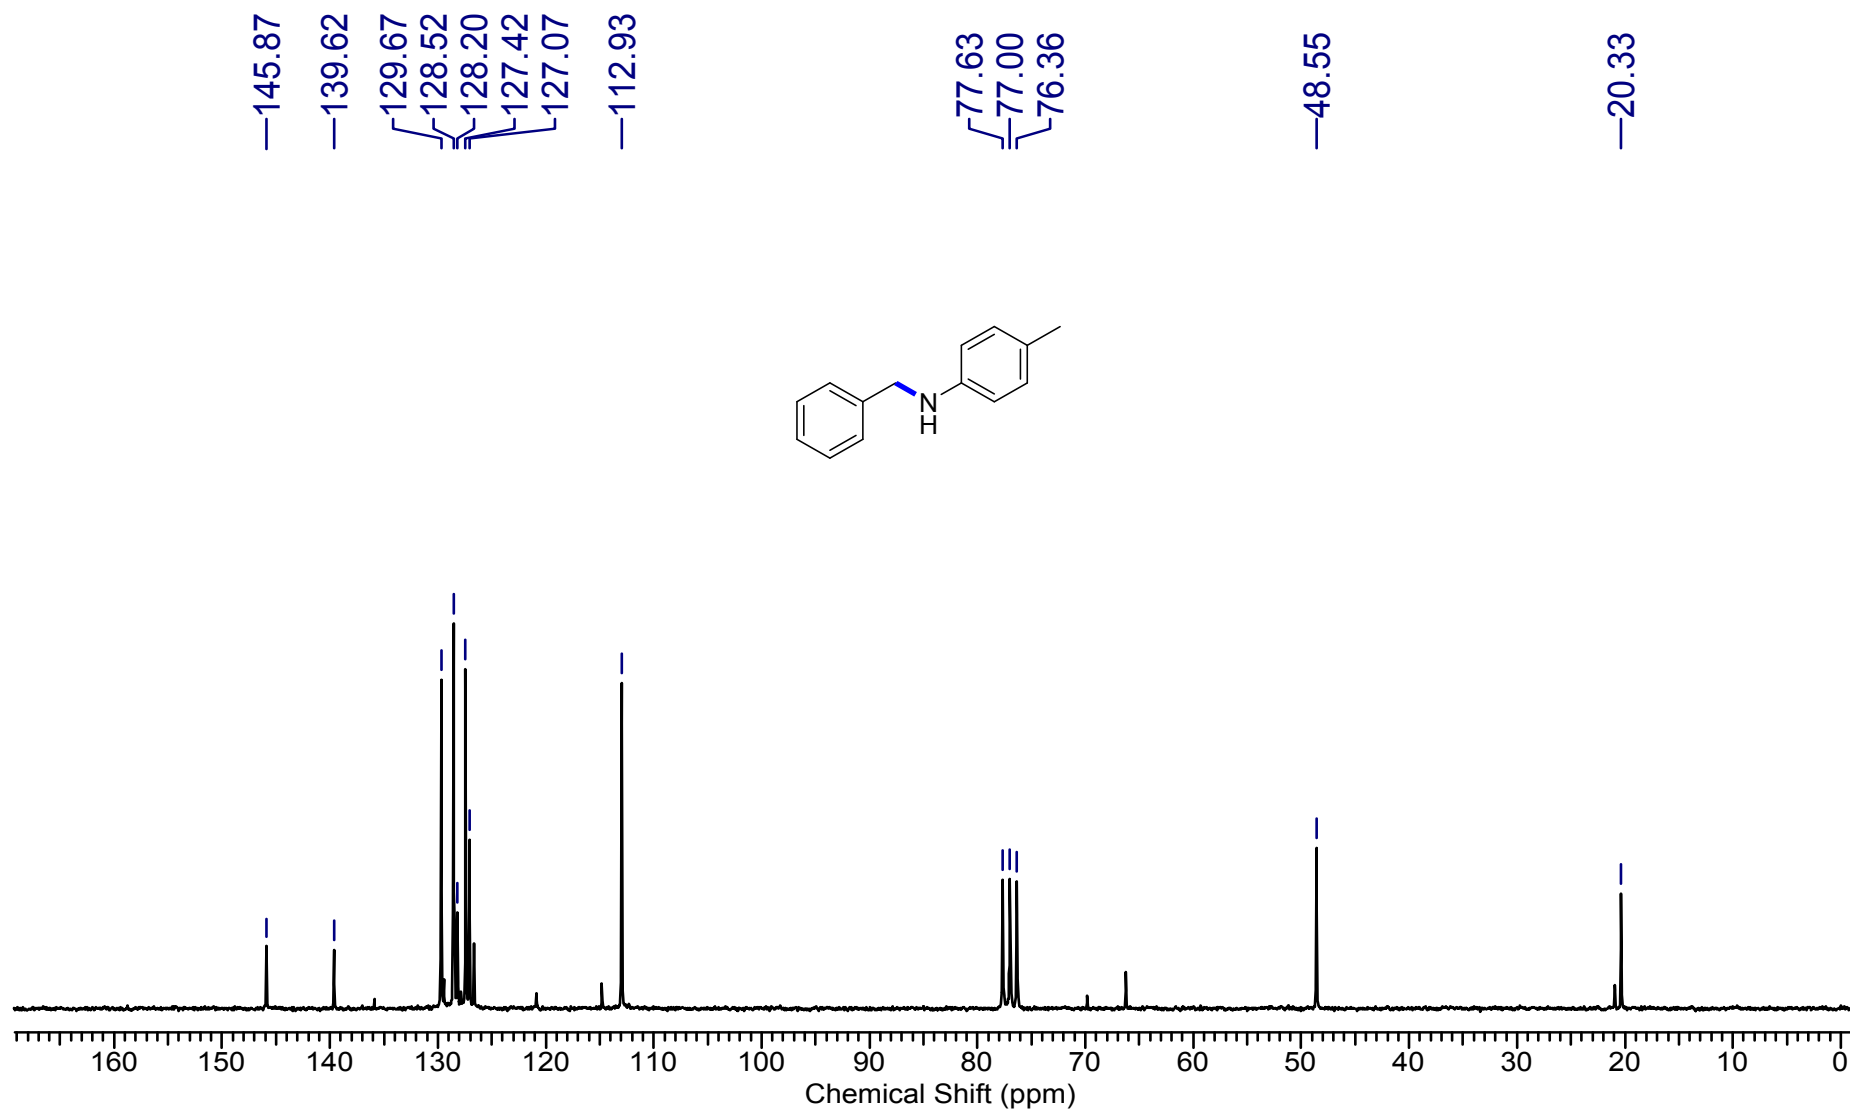

Figure S36. <sup>13</sup>C of 6c

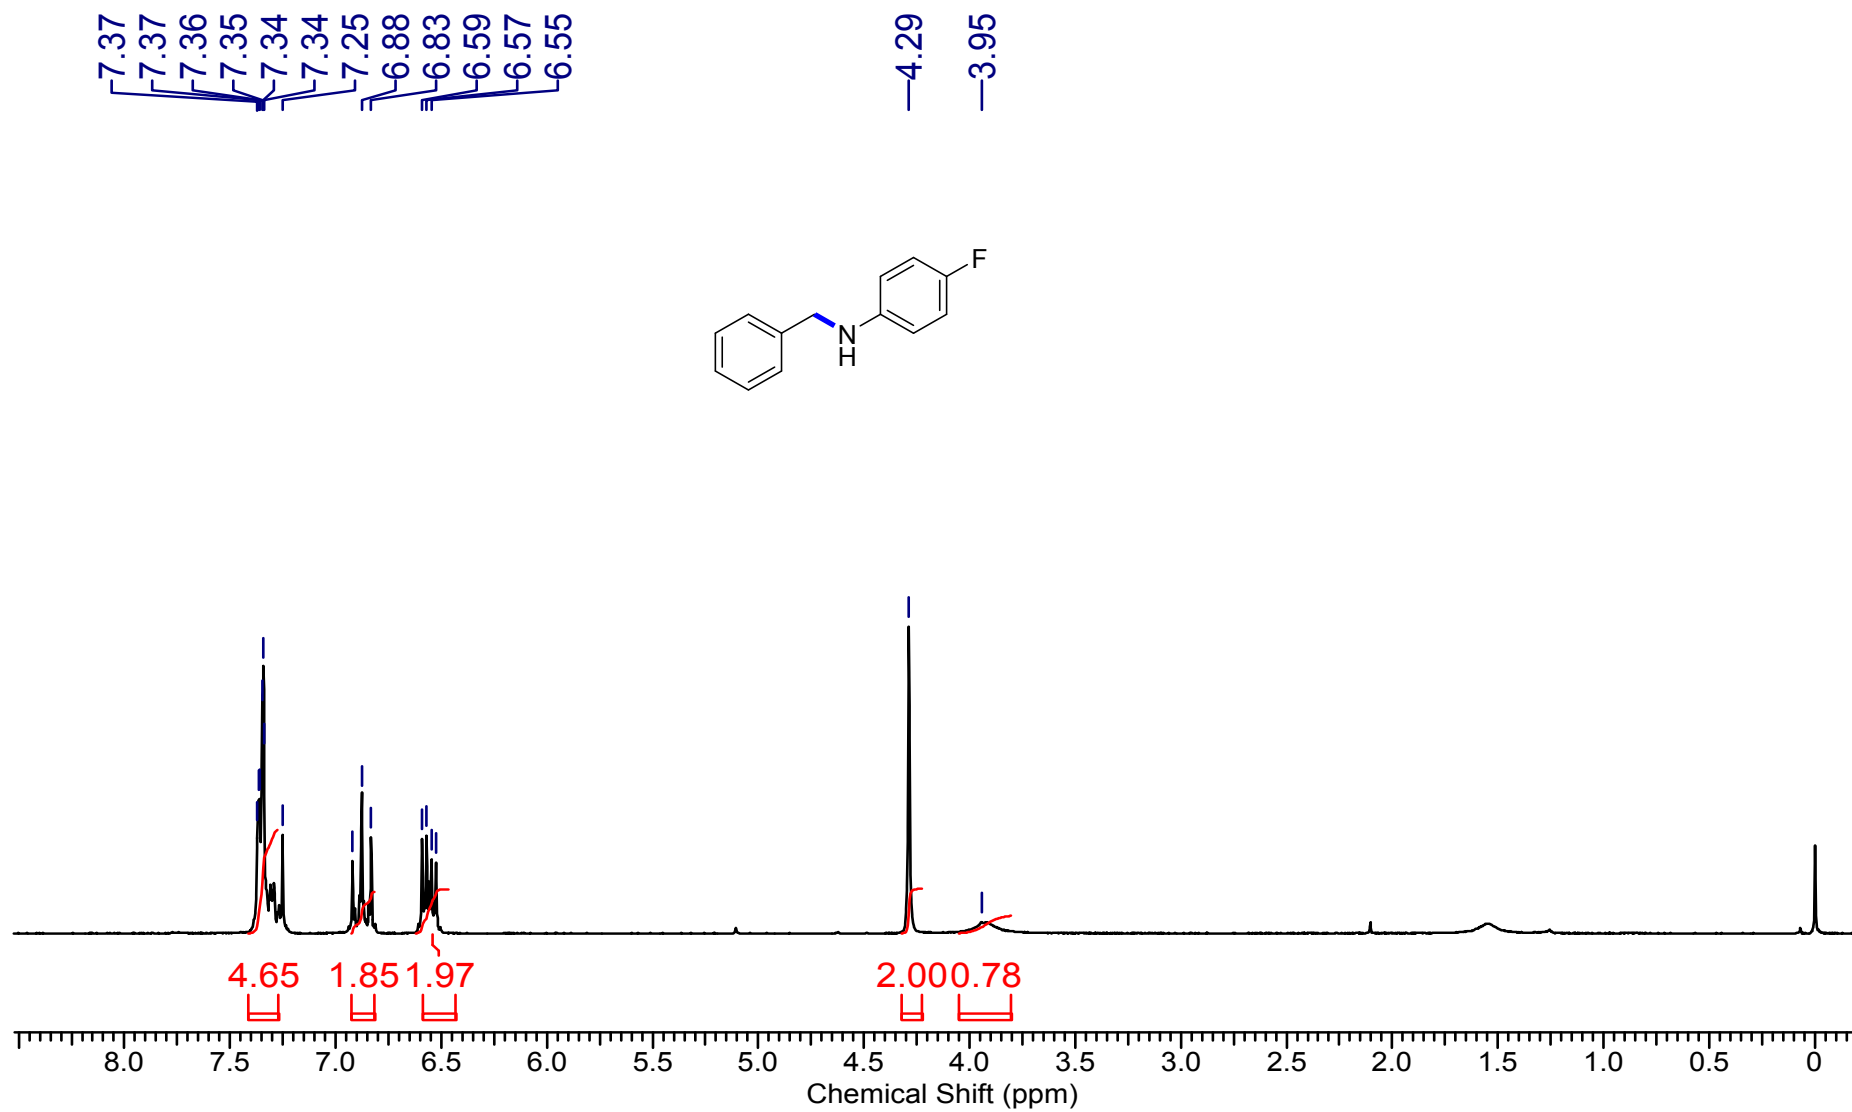

Figure S37.  $^1\text{H}$  of 6d

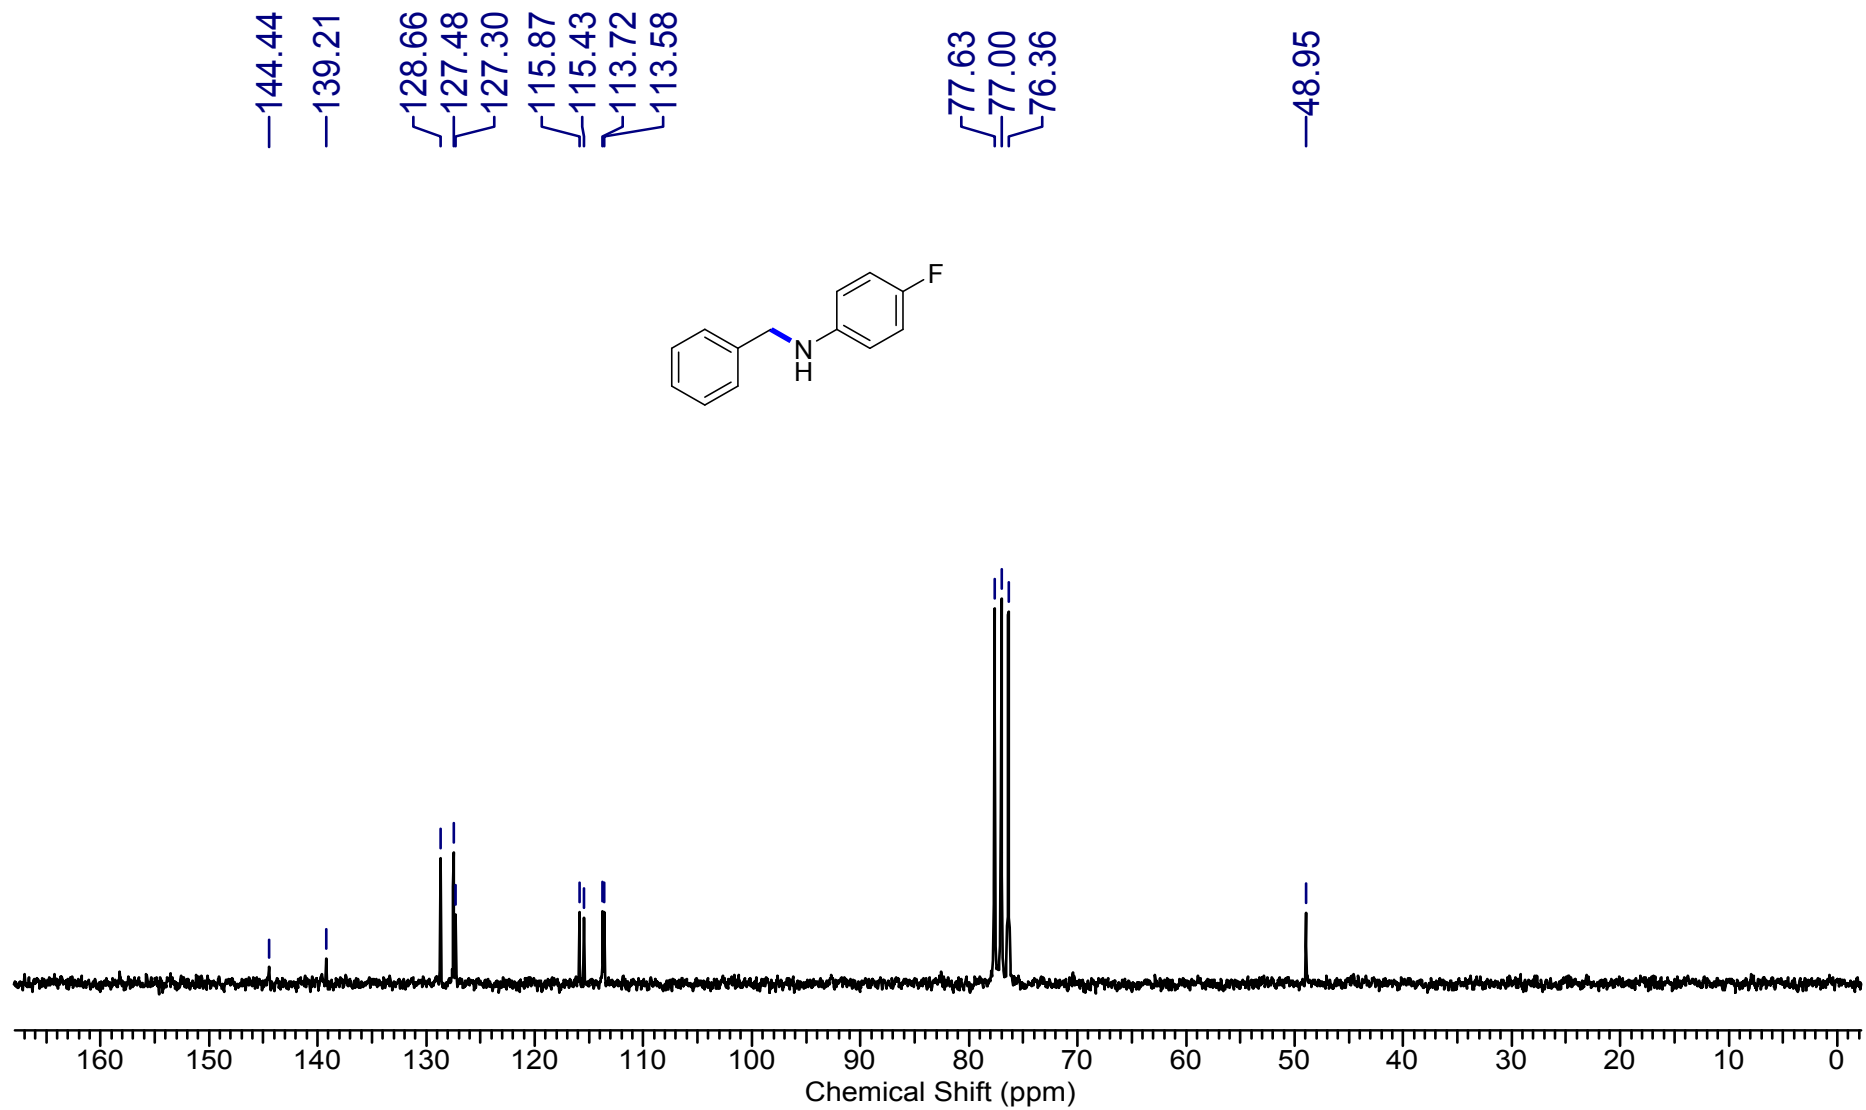

Figure S38. <sup>13</sup>C of 6d



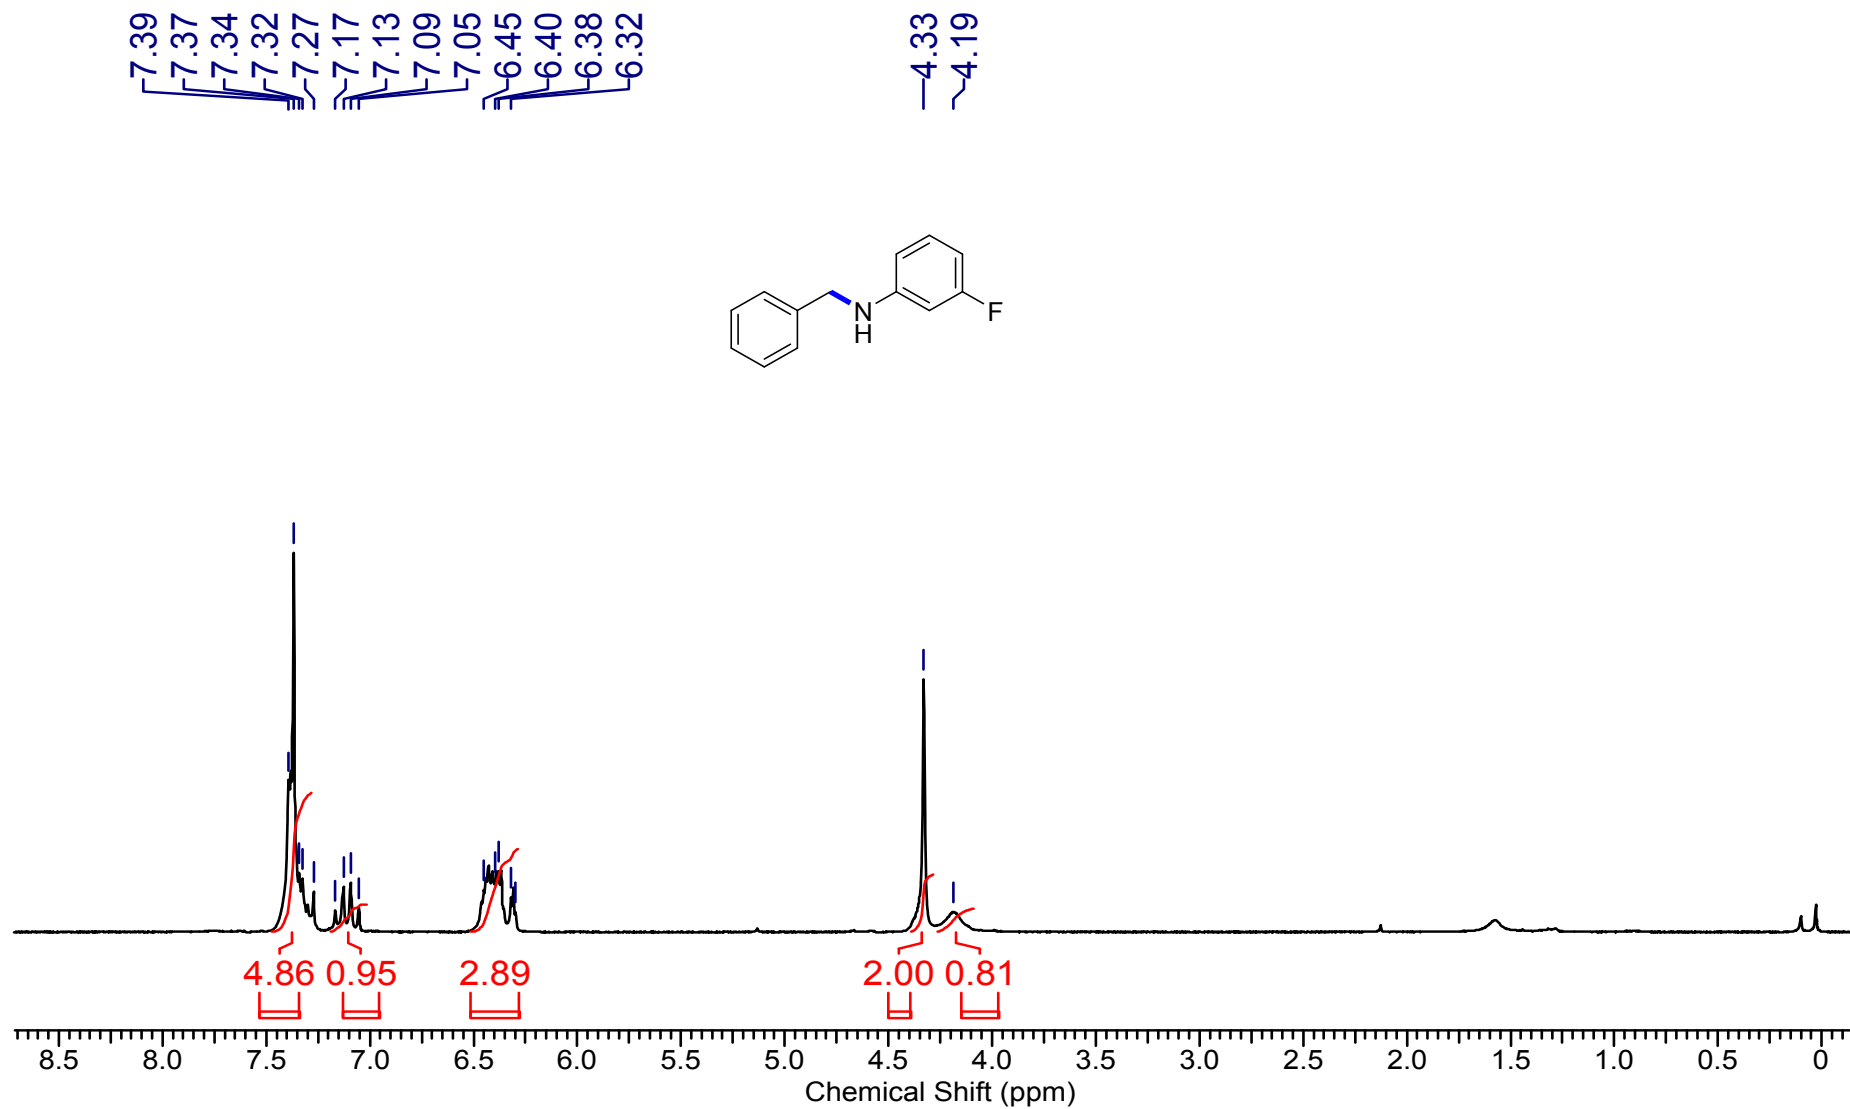

Figure S39. <sup>1</sup>H of 6e

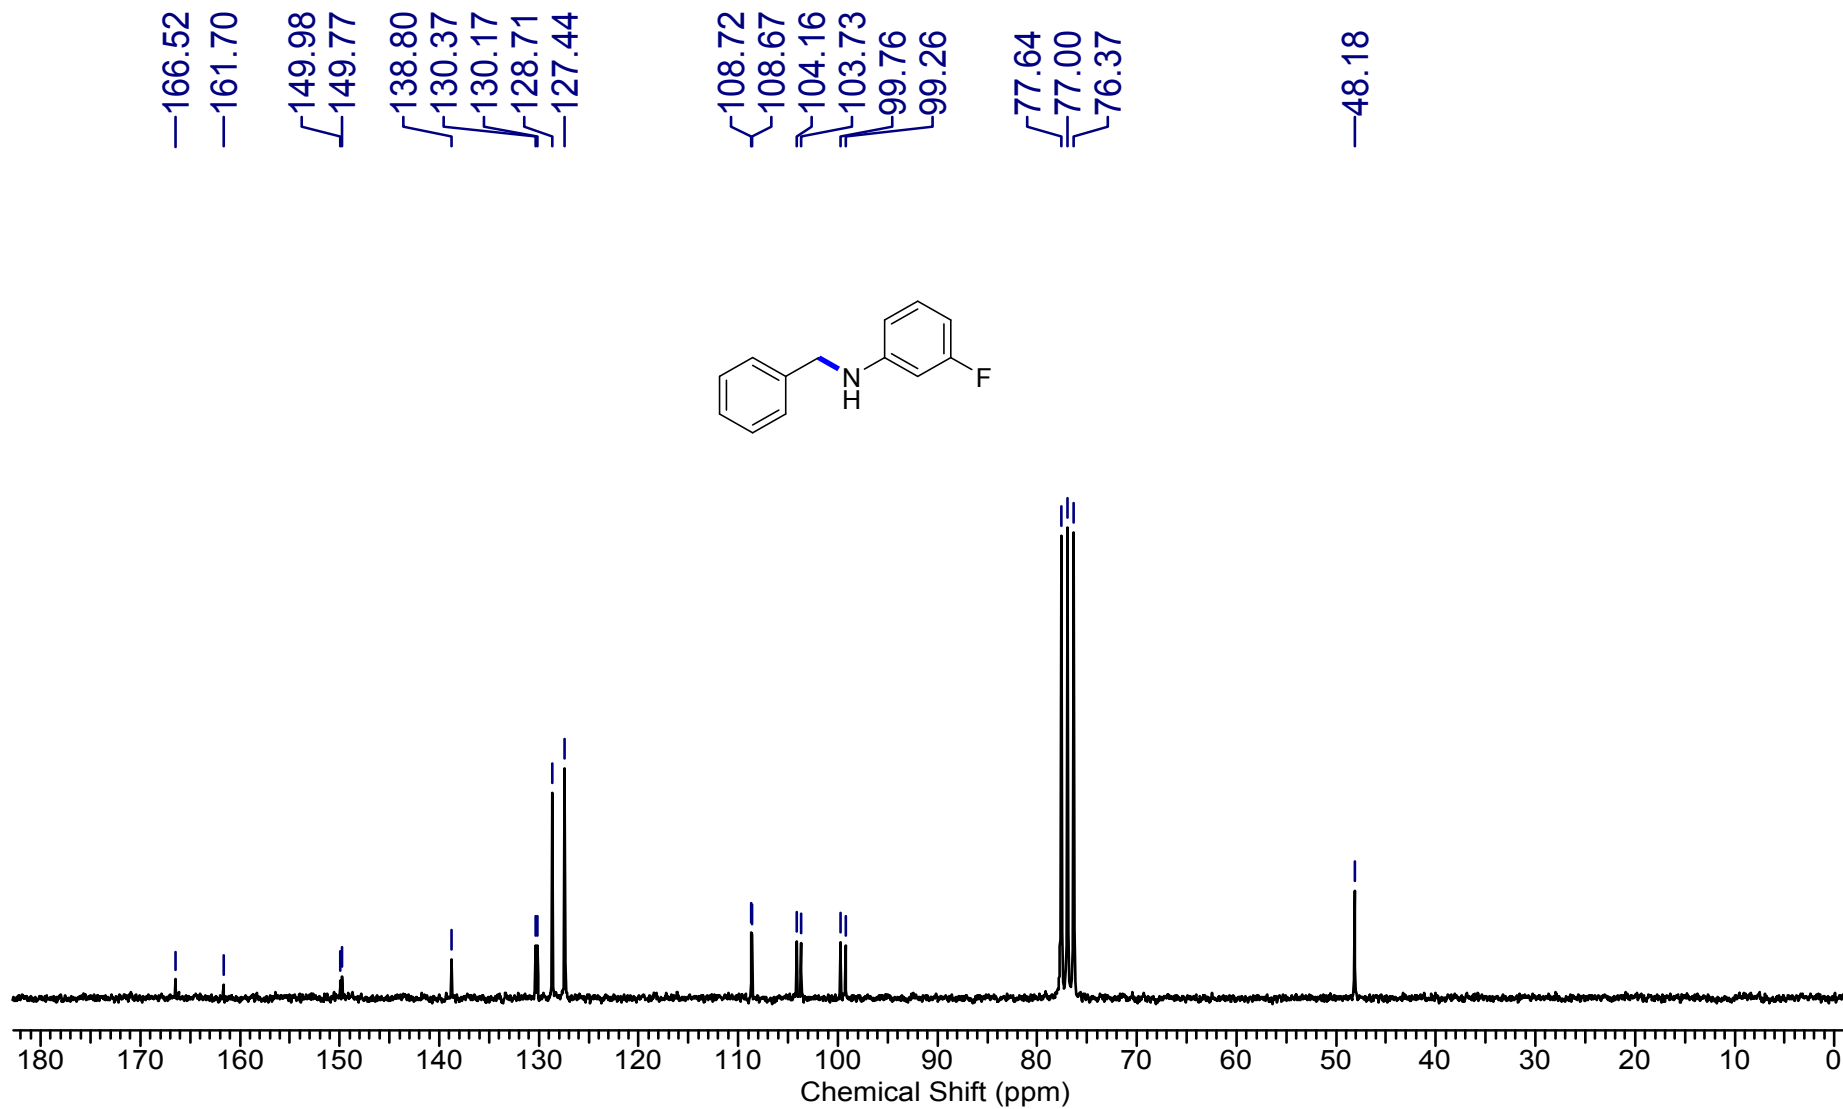

Figure S40.  $^{13}\text{C}$  of 6e

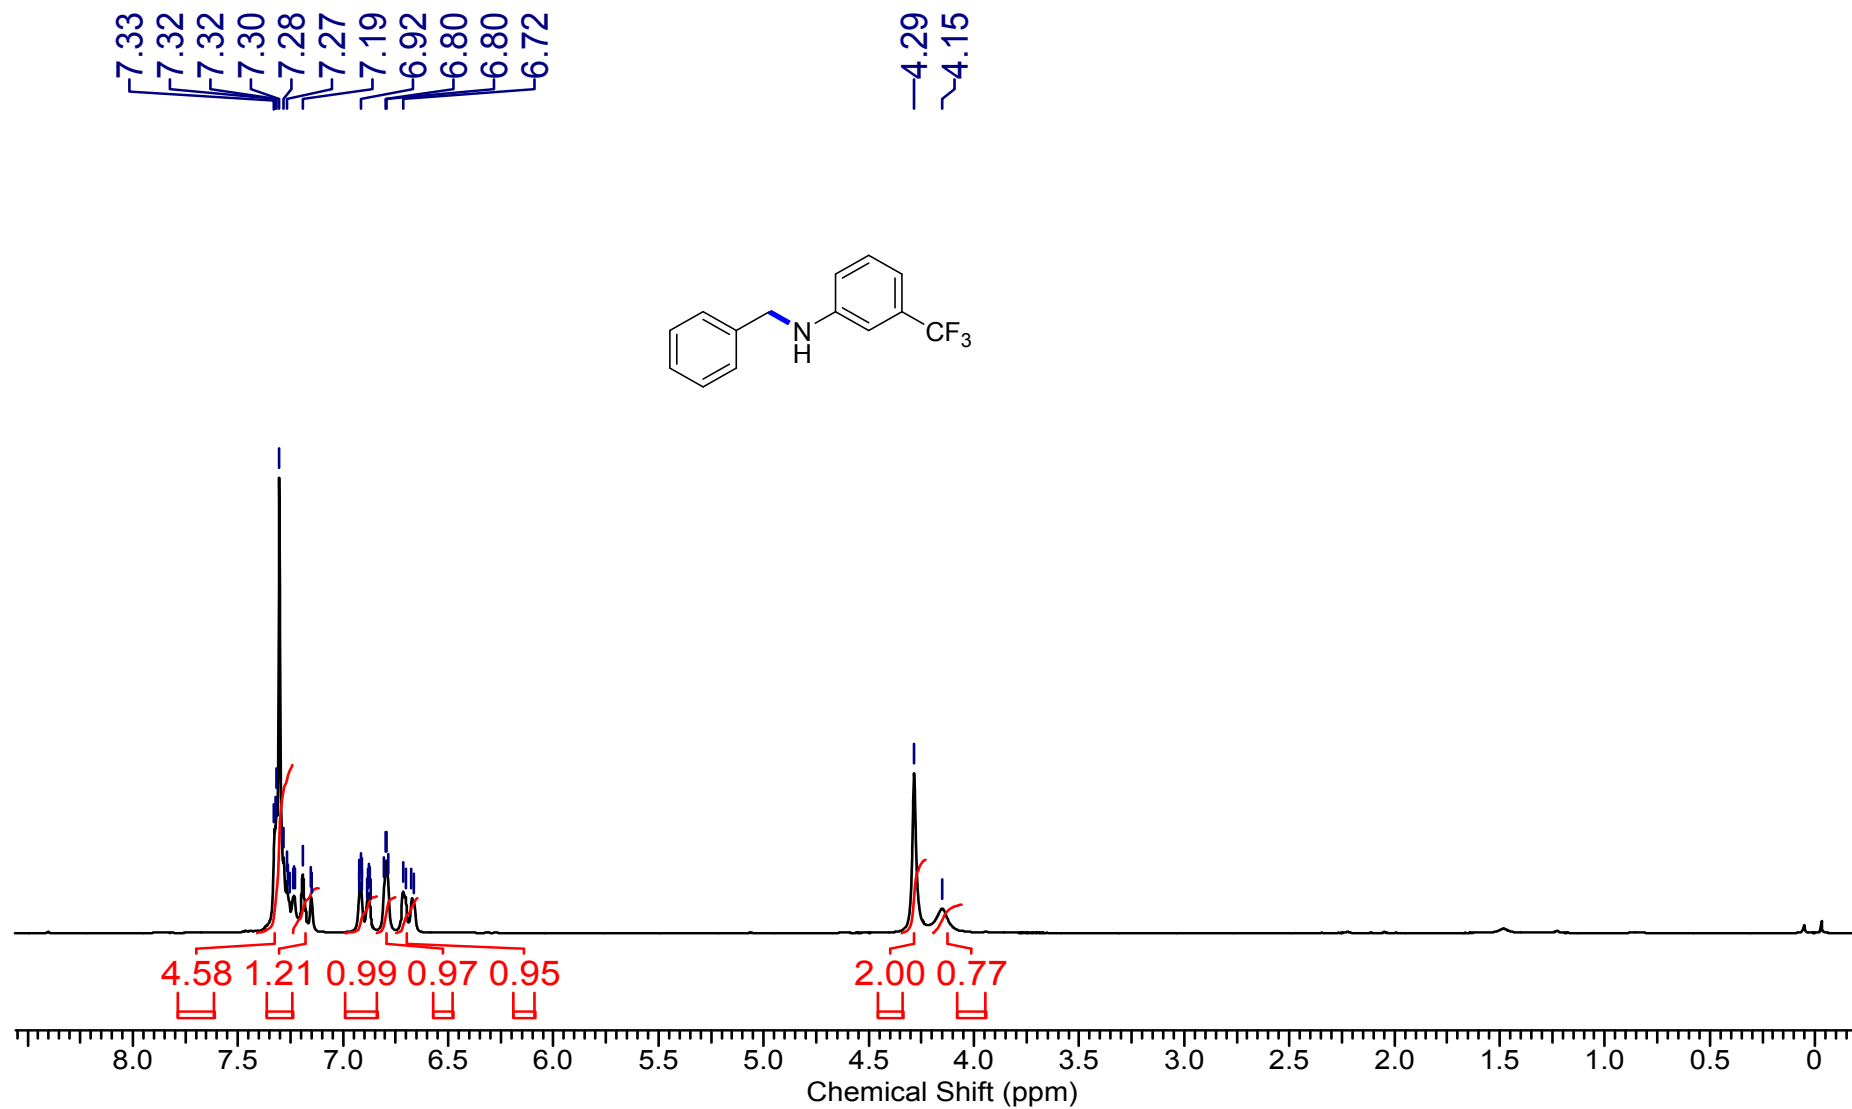

Figure S41.  $^1\text{H}$  of 6f

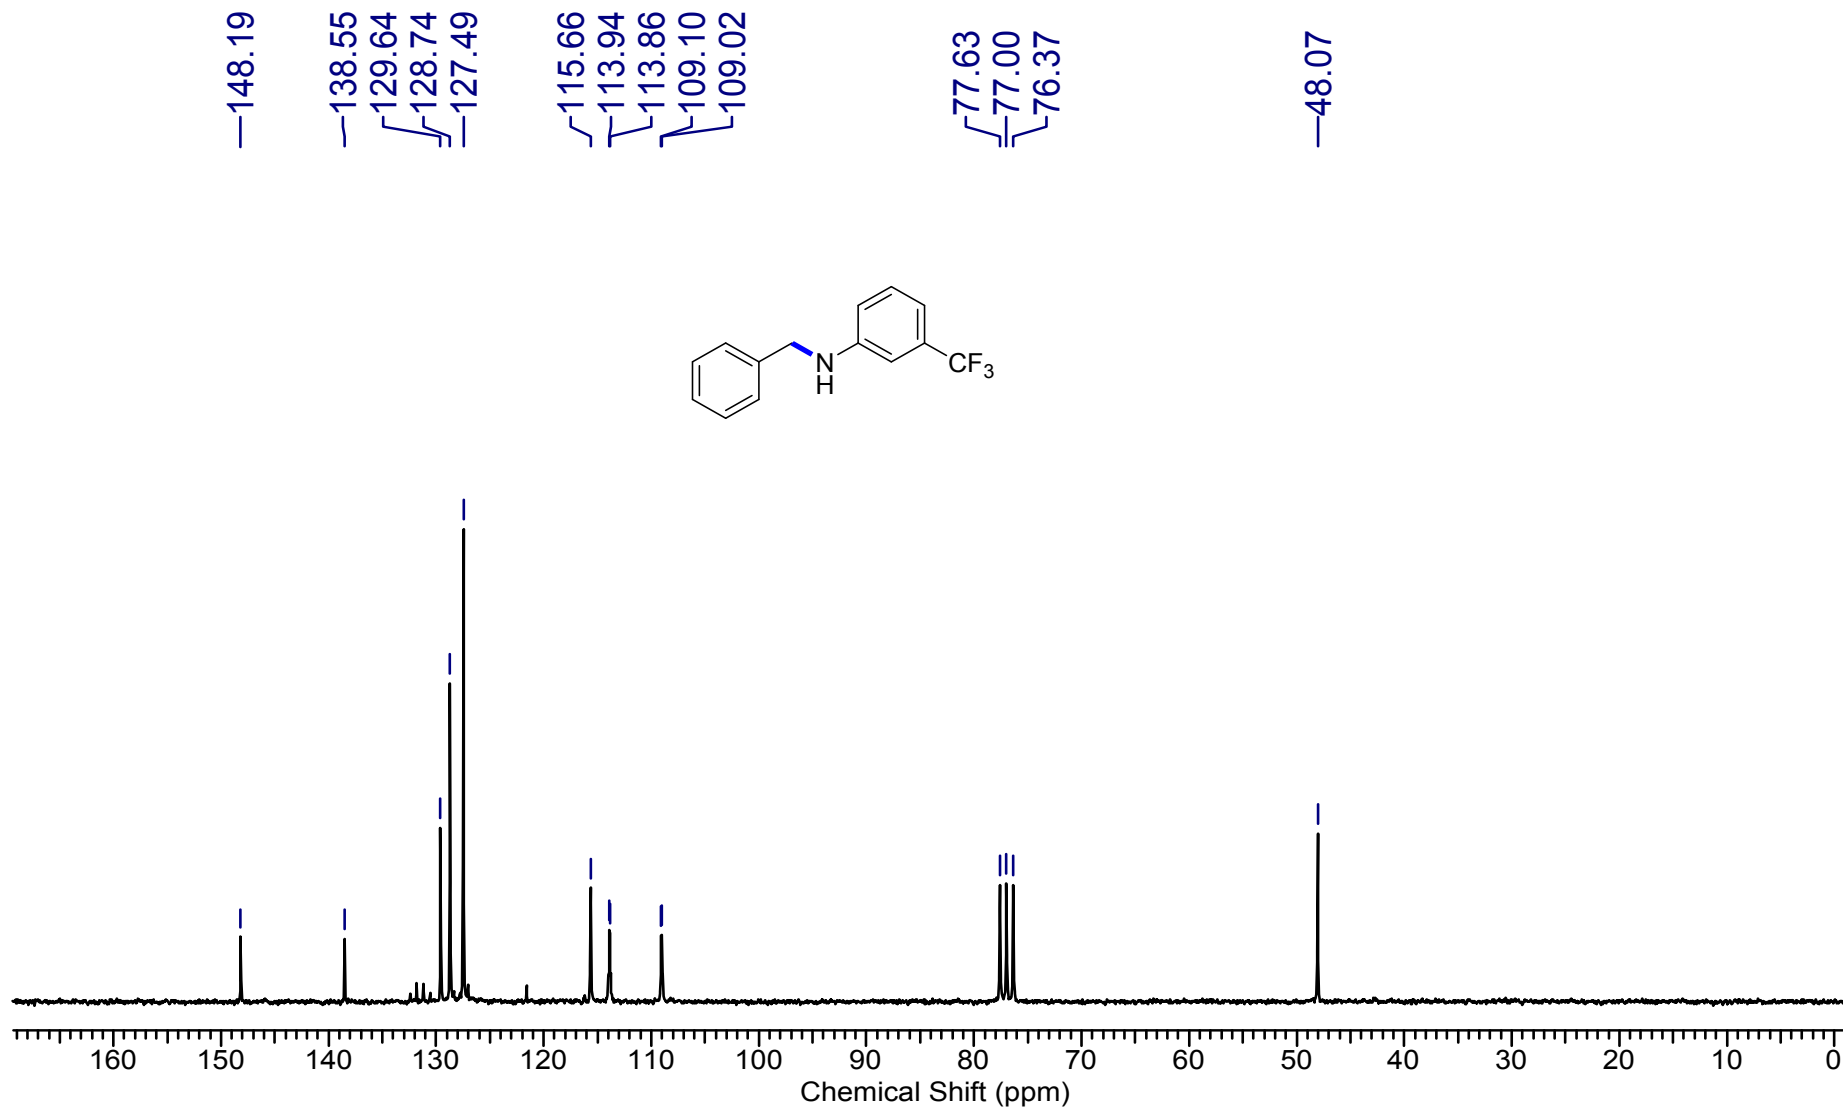

Figure S42. <sup>13</sup>C of 6f

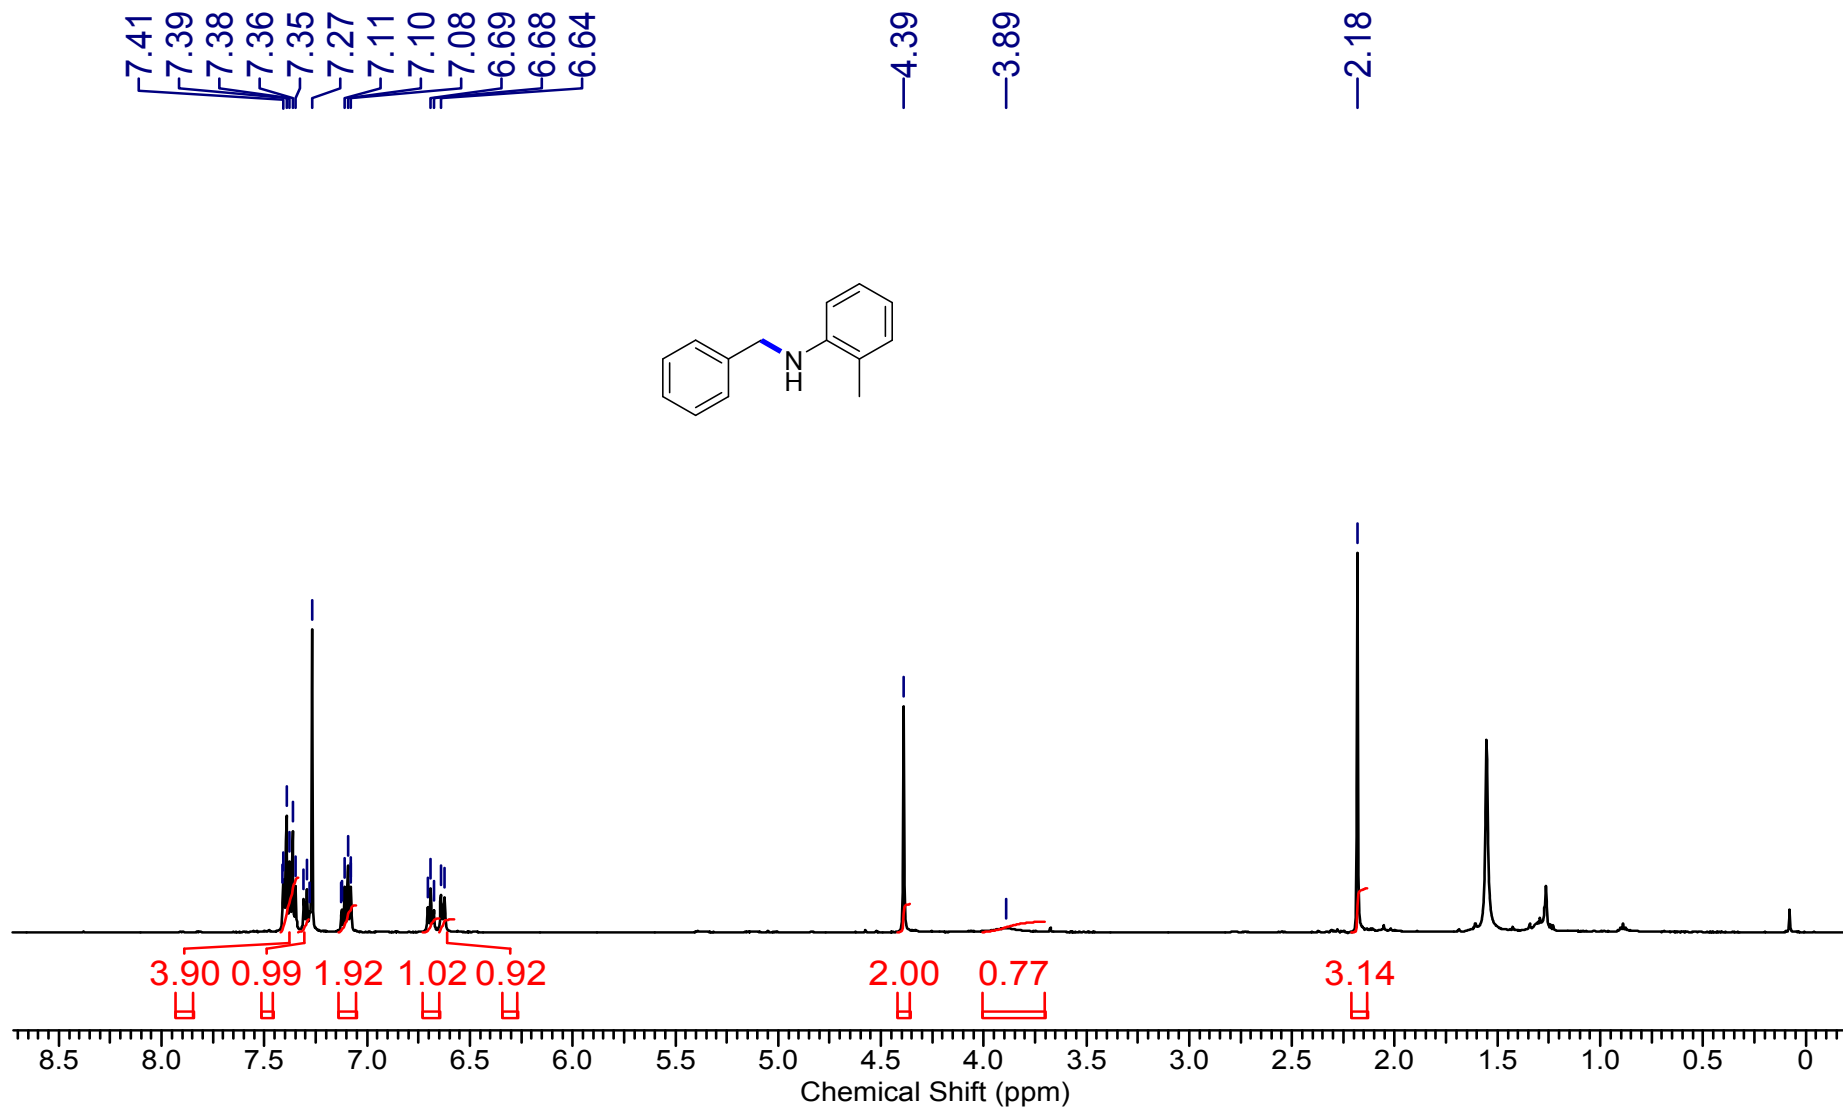

Figure S43.  $^1\text{H}$  of 6g

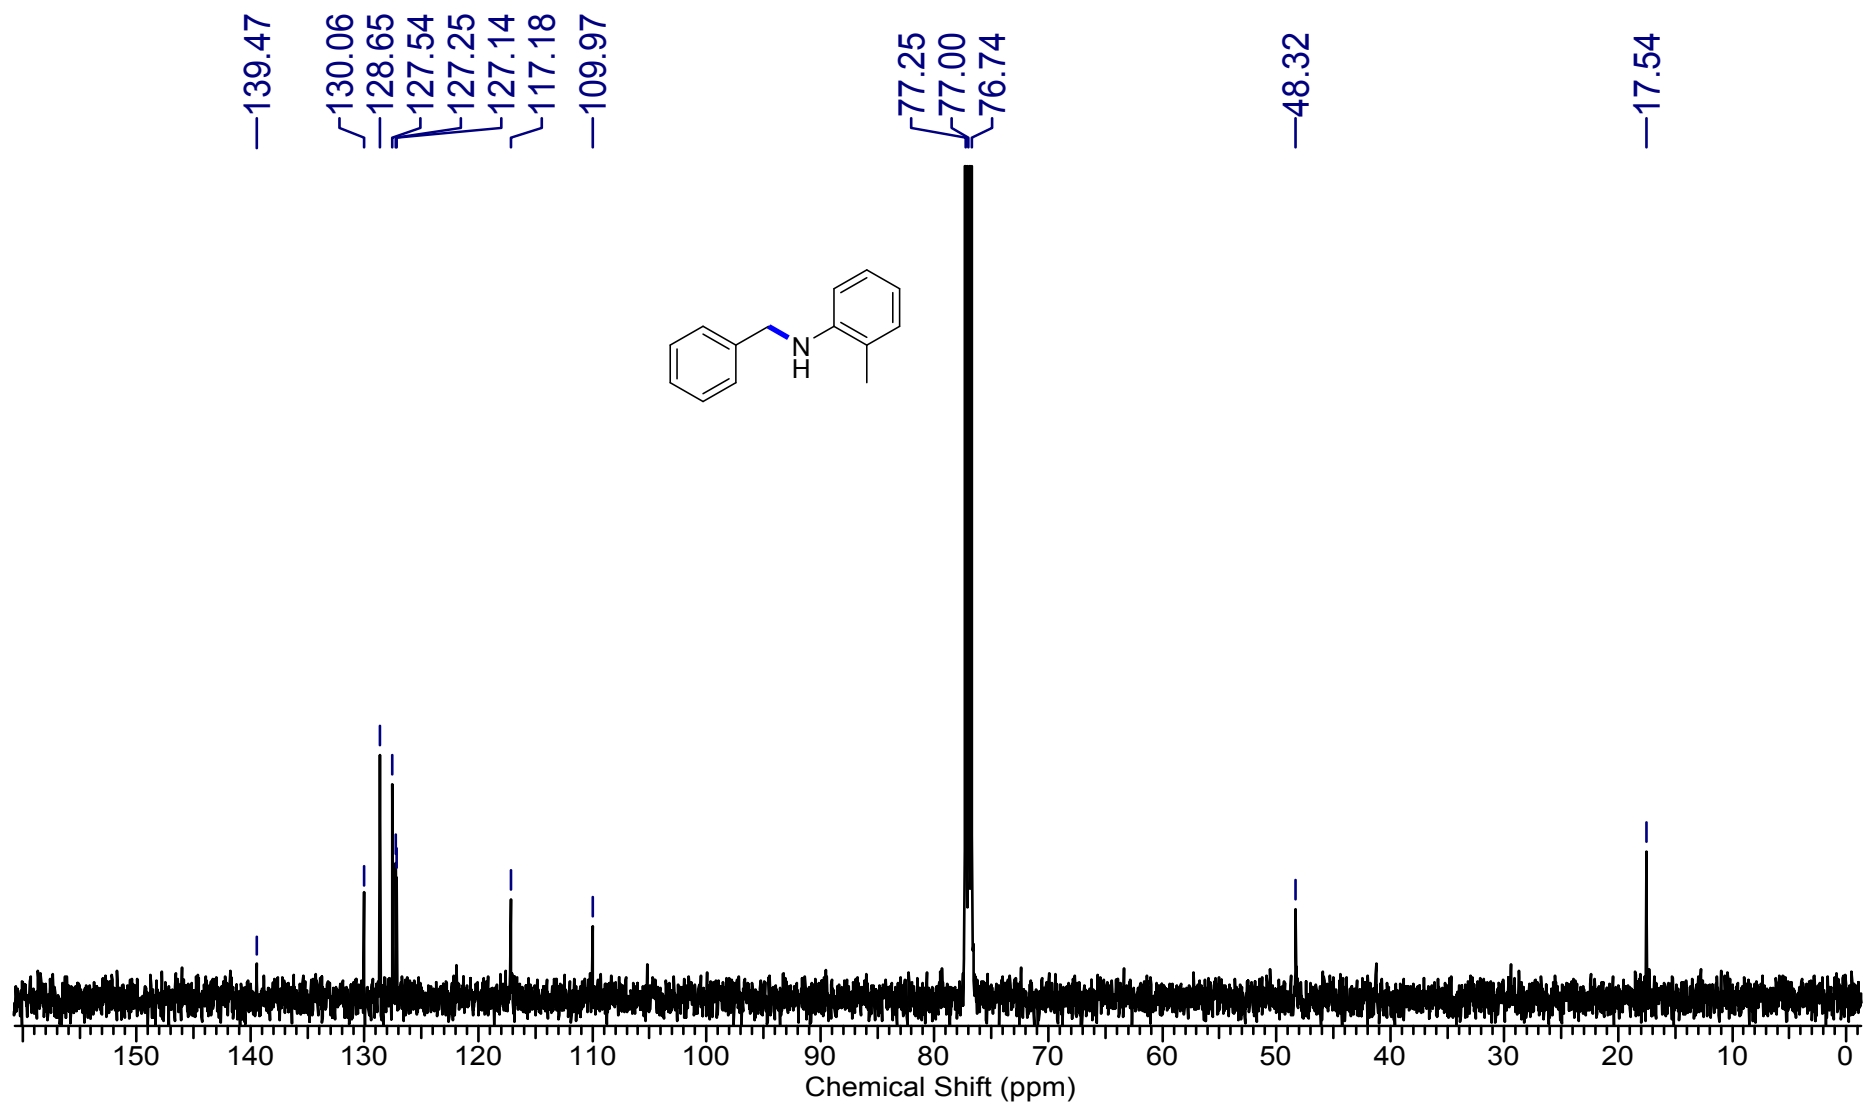

Figure S44.  $^{13}\text{C}$  of **6g**

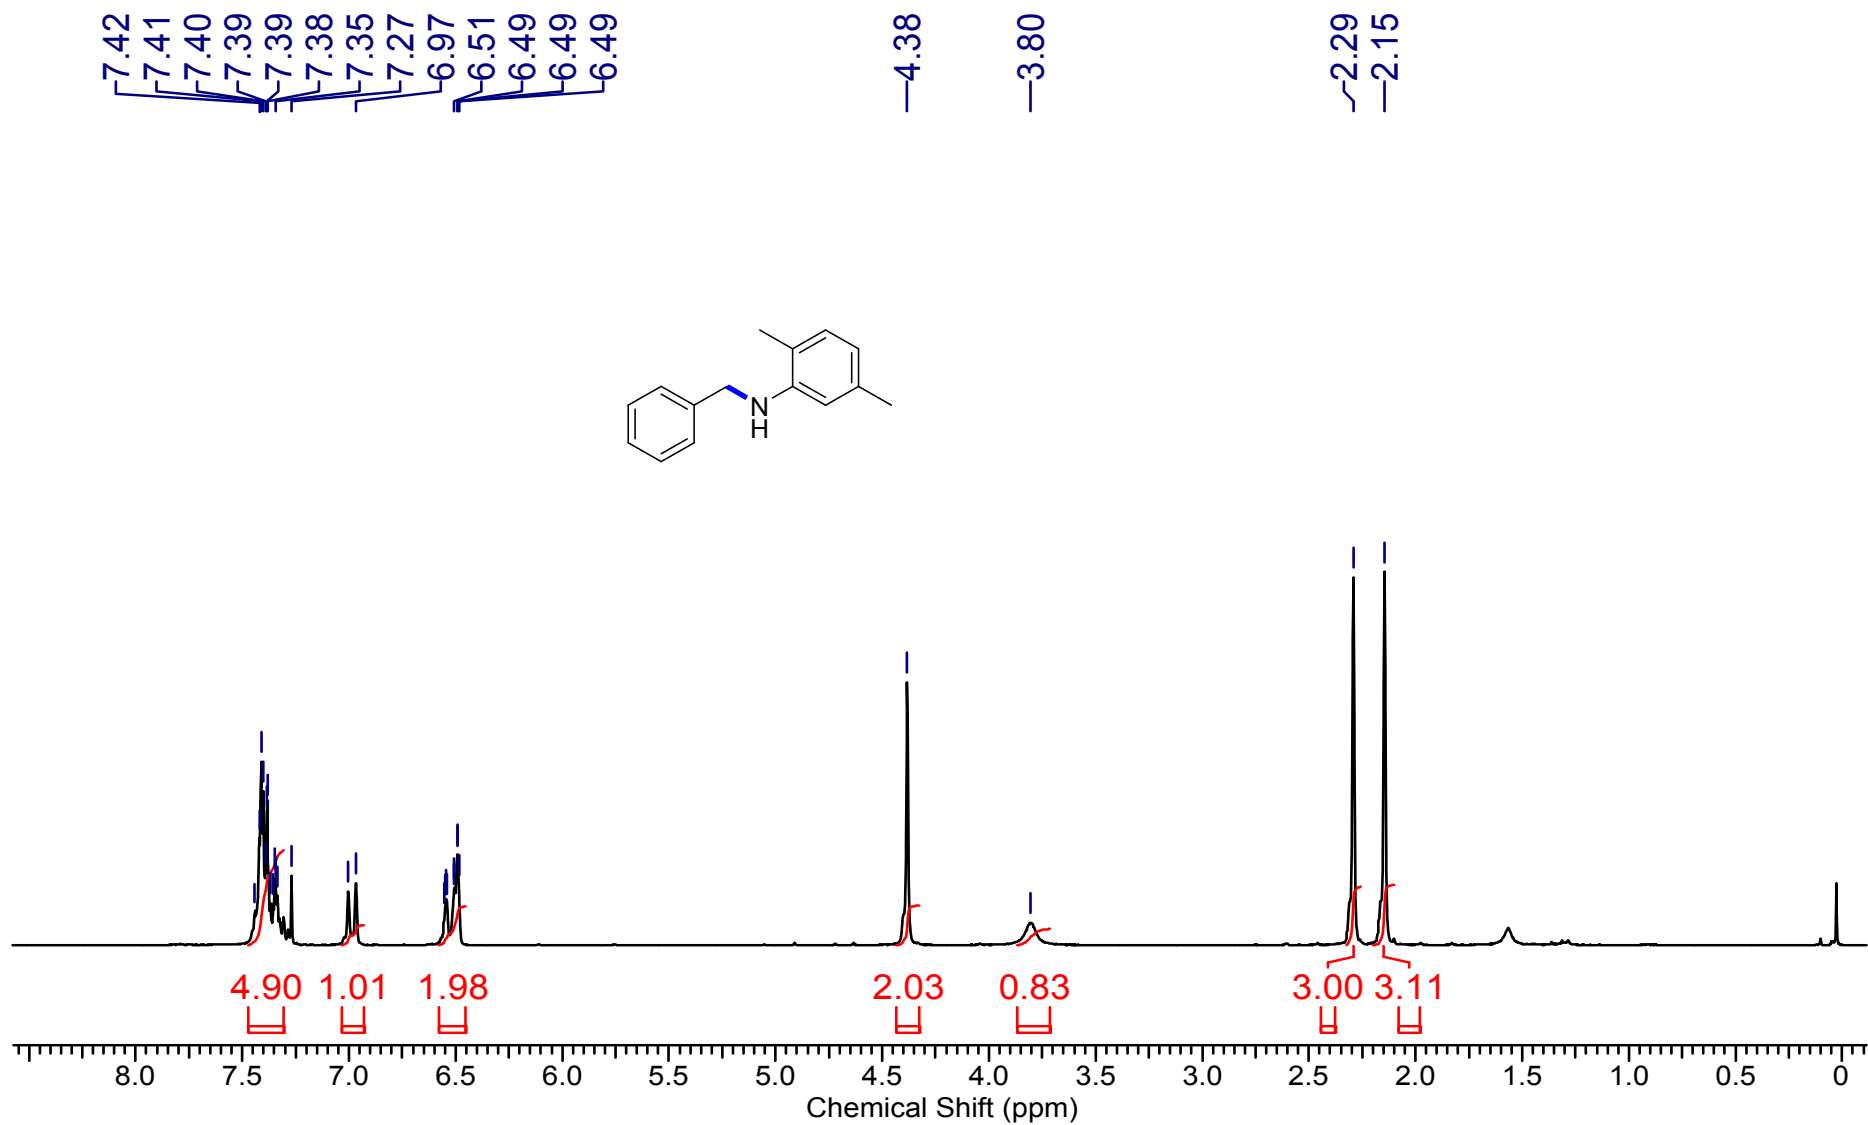

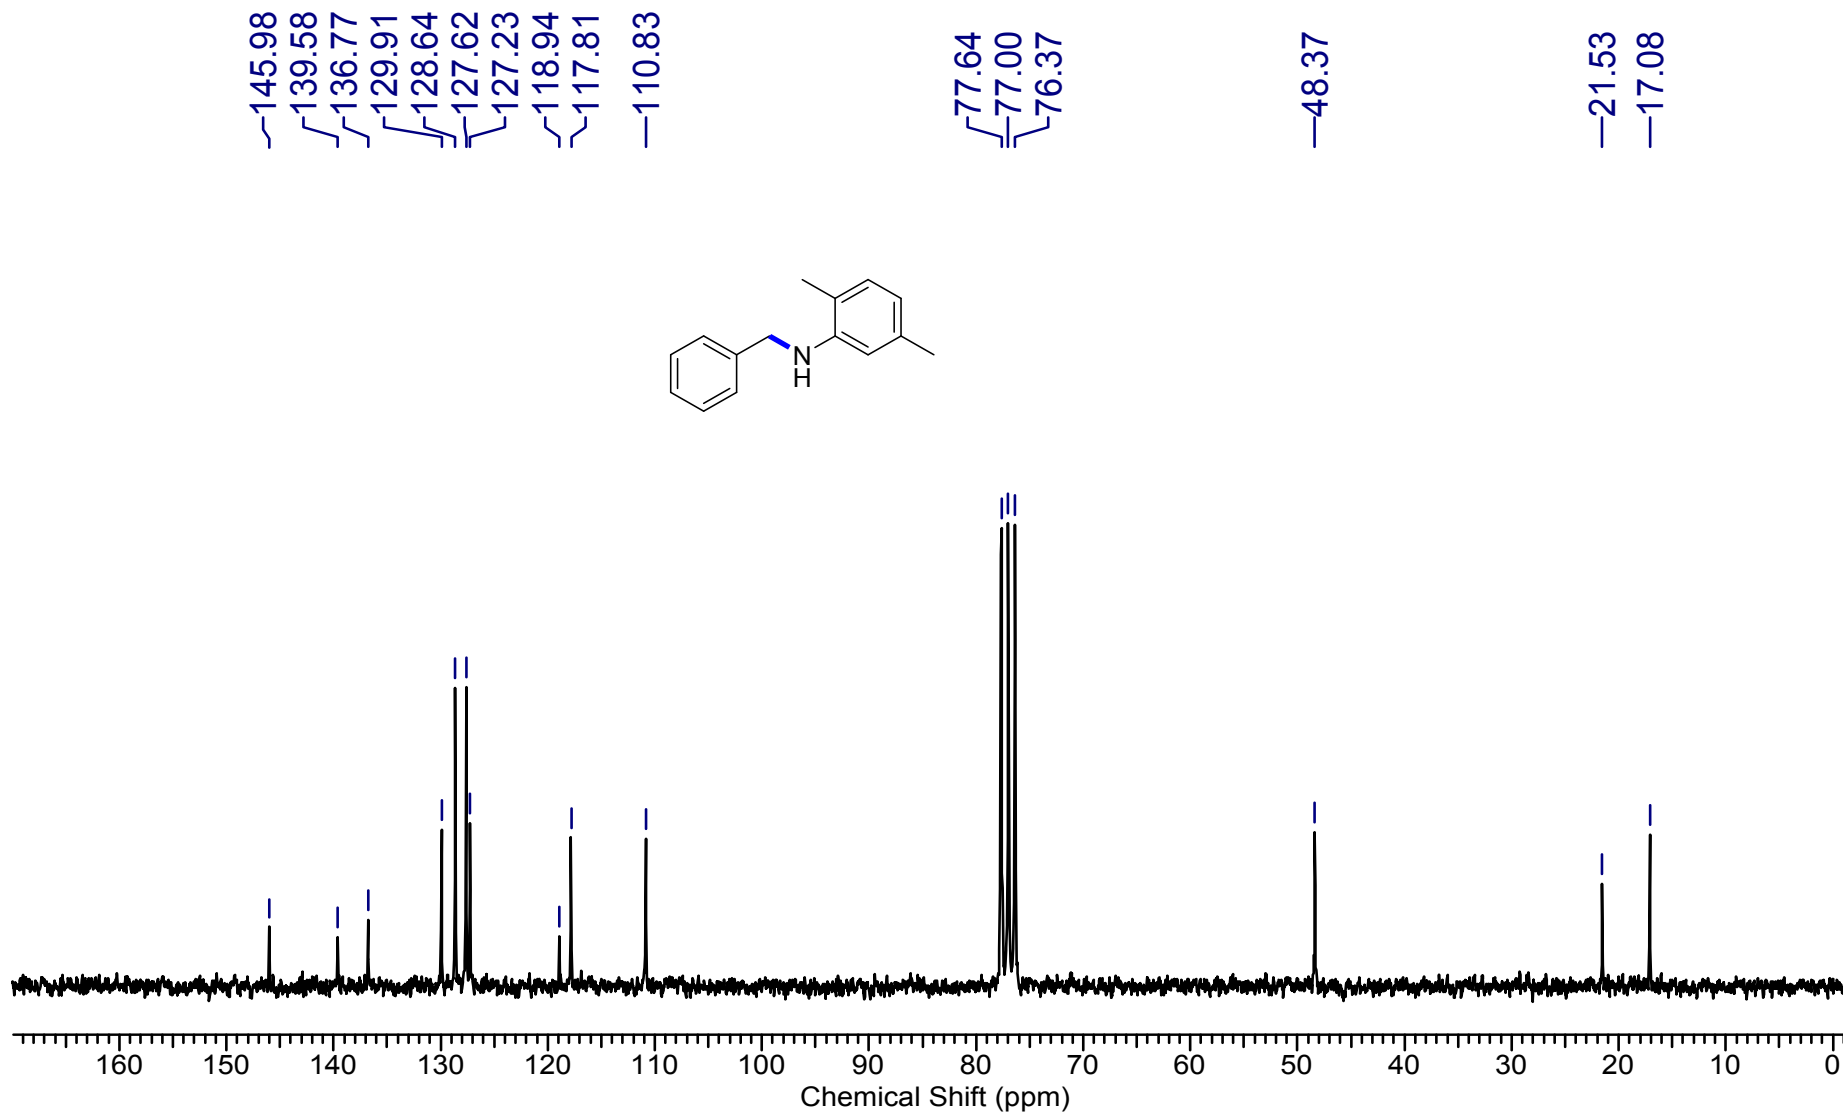

Figure S46. <sup>13</sup>C of 6h



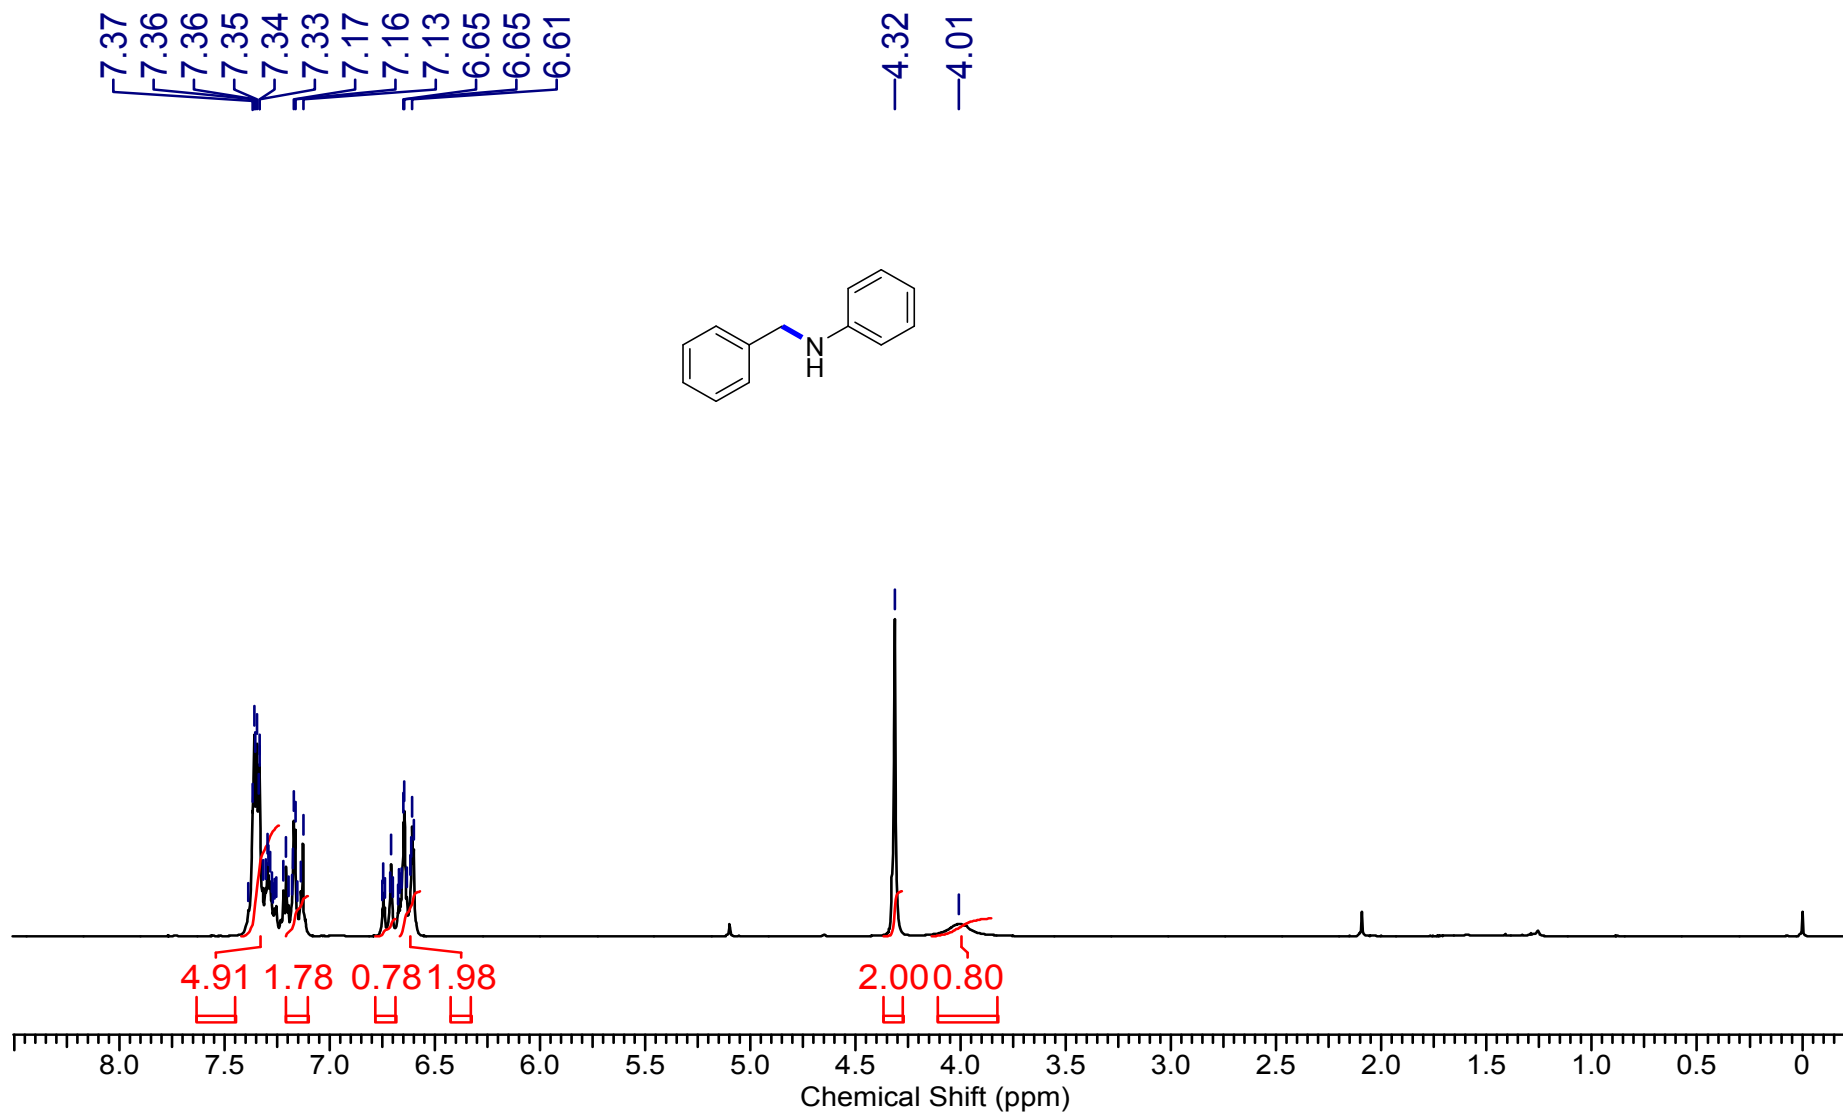

Figure S47. <sup>1</sup>H of 6i

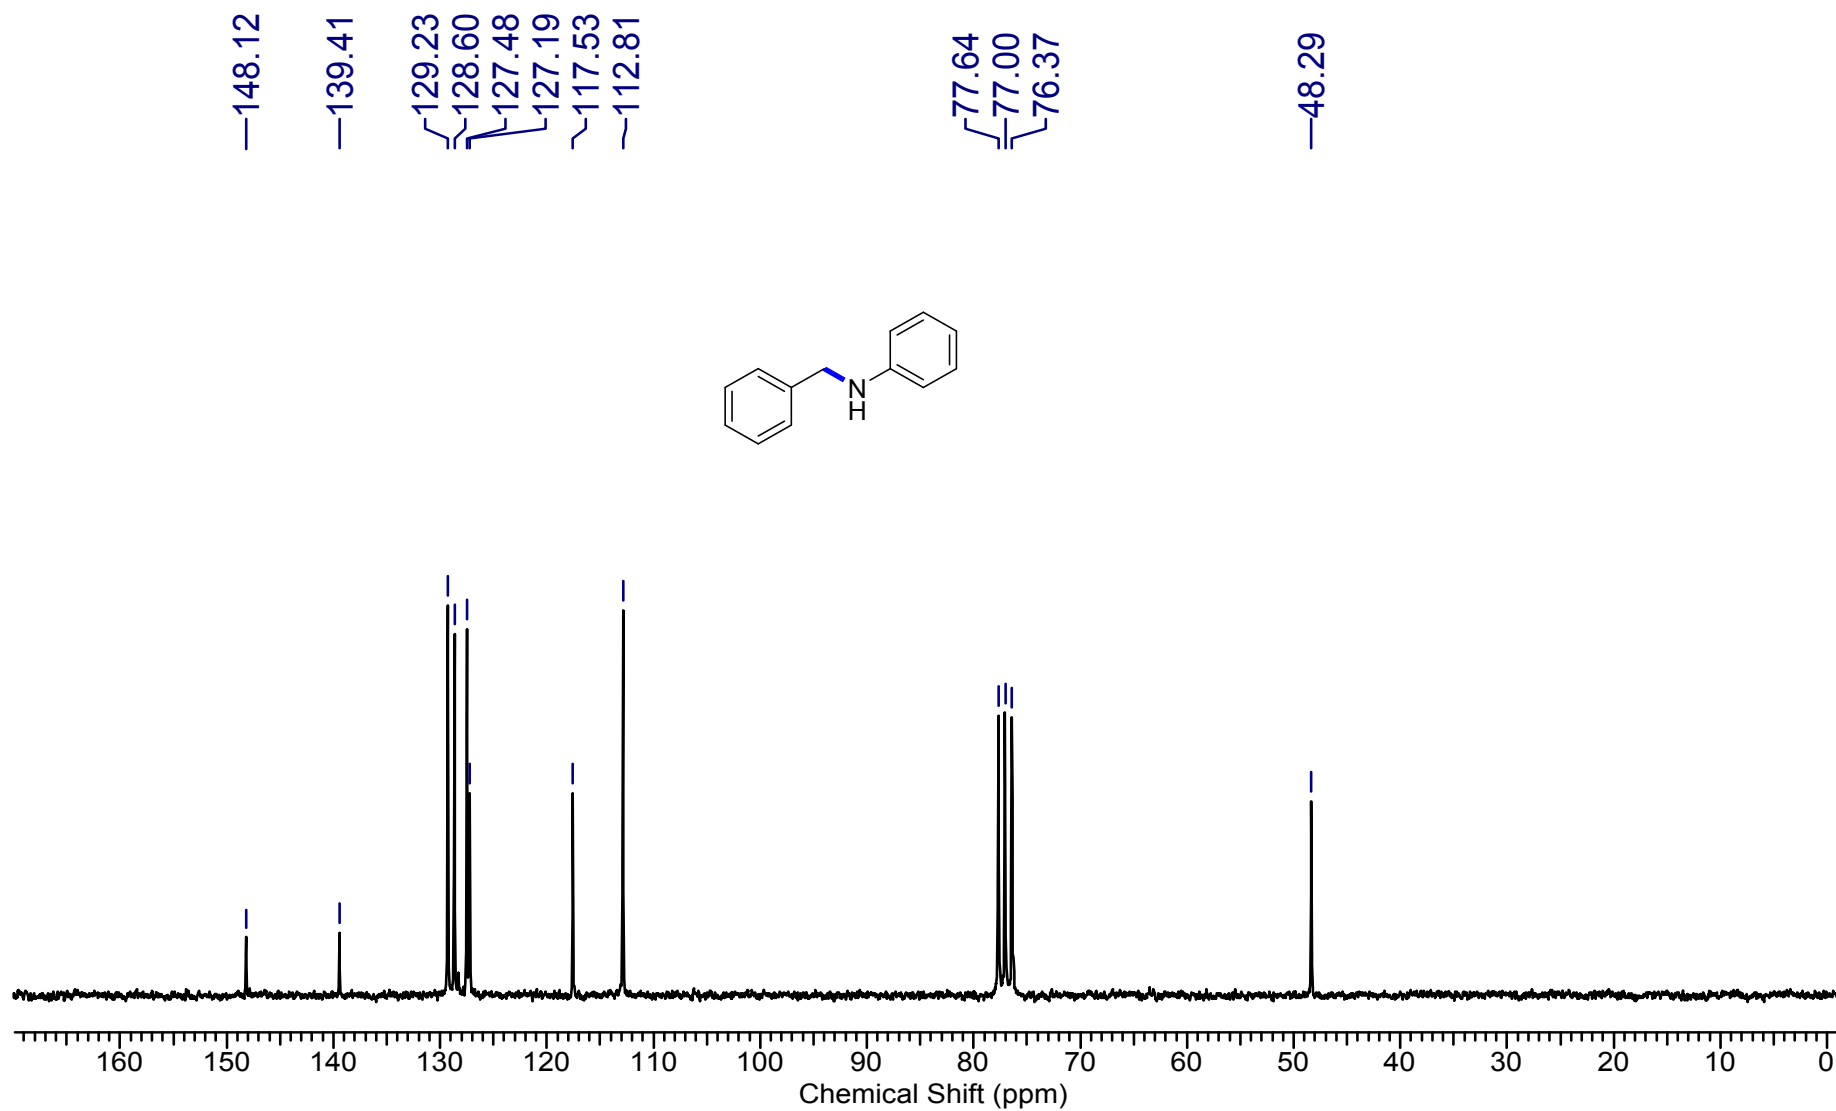

Figure S48. <sup>13</sup>C of **6i**

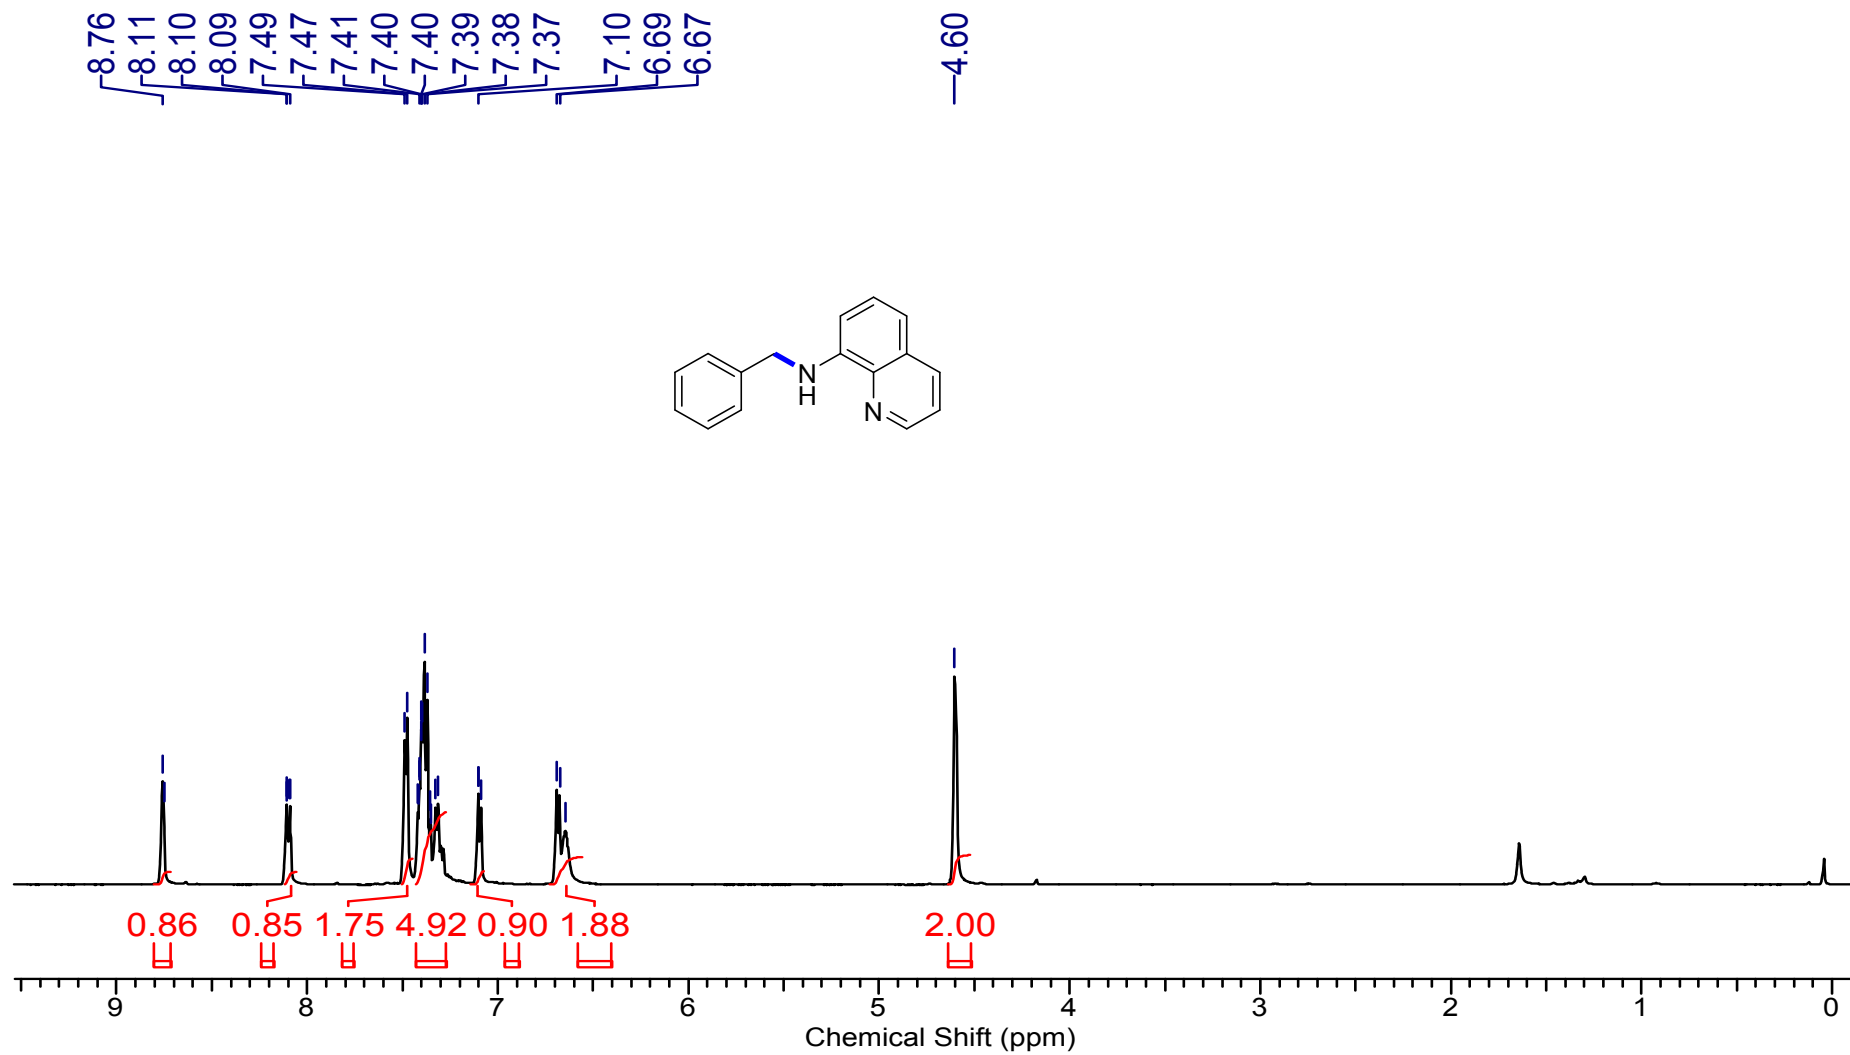

Figure S49.  $^1\text{H}$  of 6j

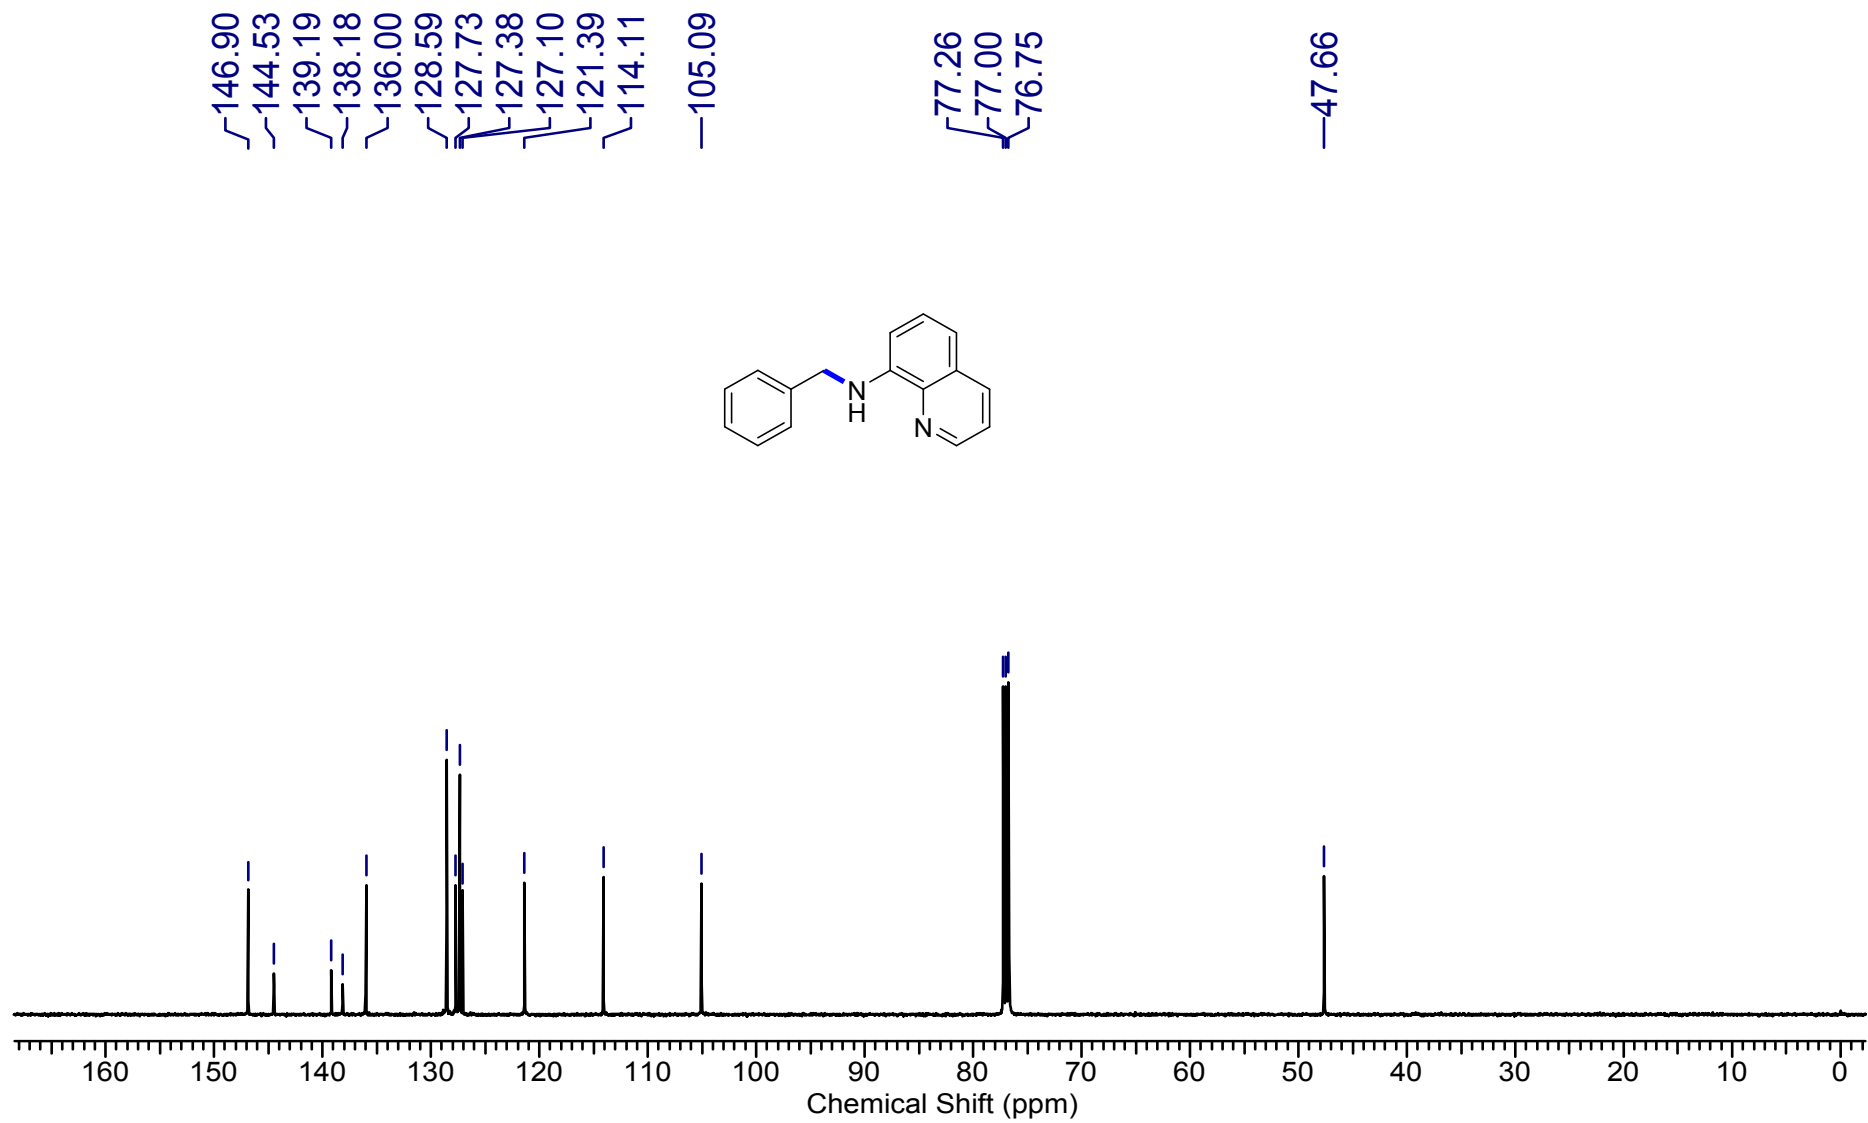

Figure S50. <sup>13</sup>C of 6j

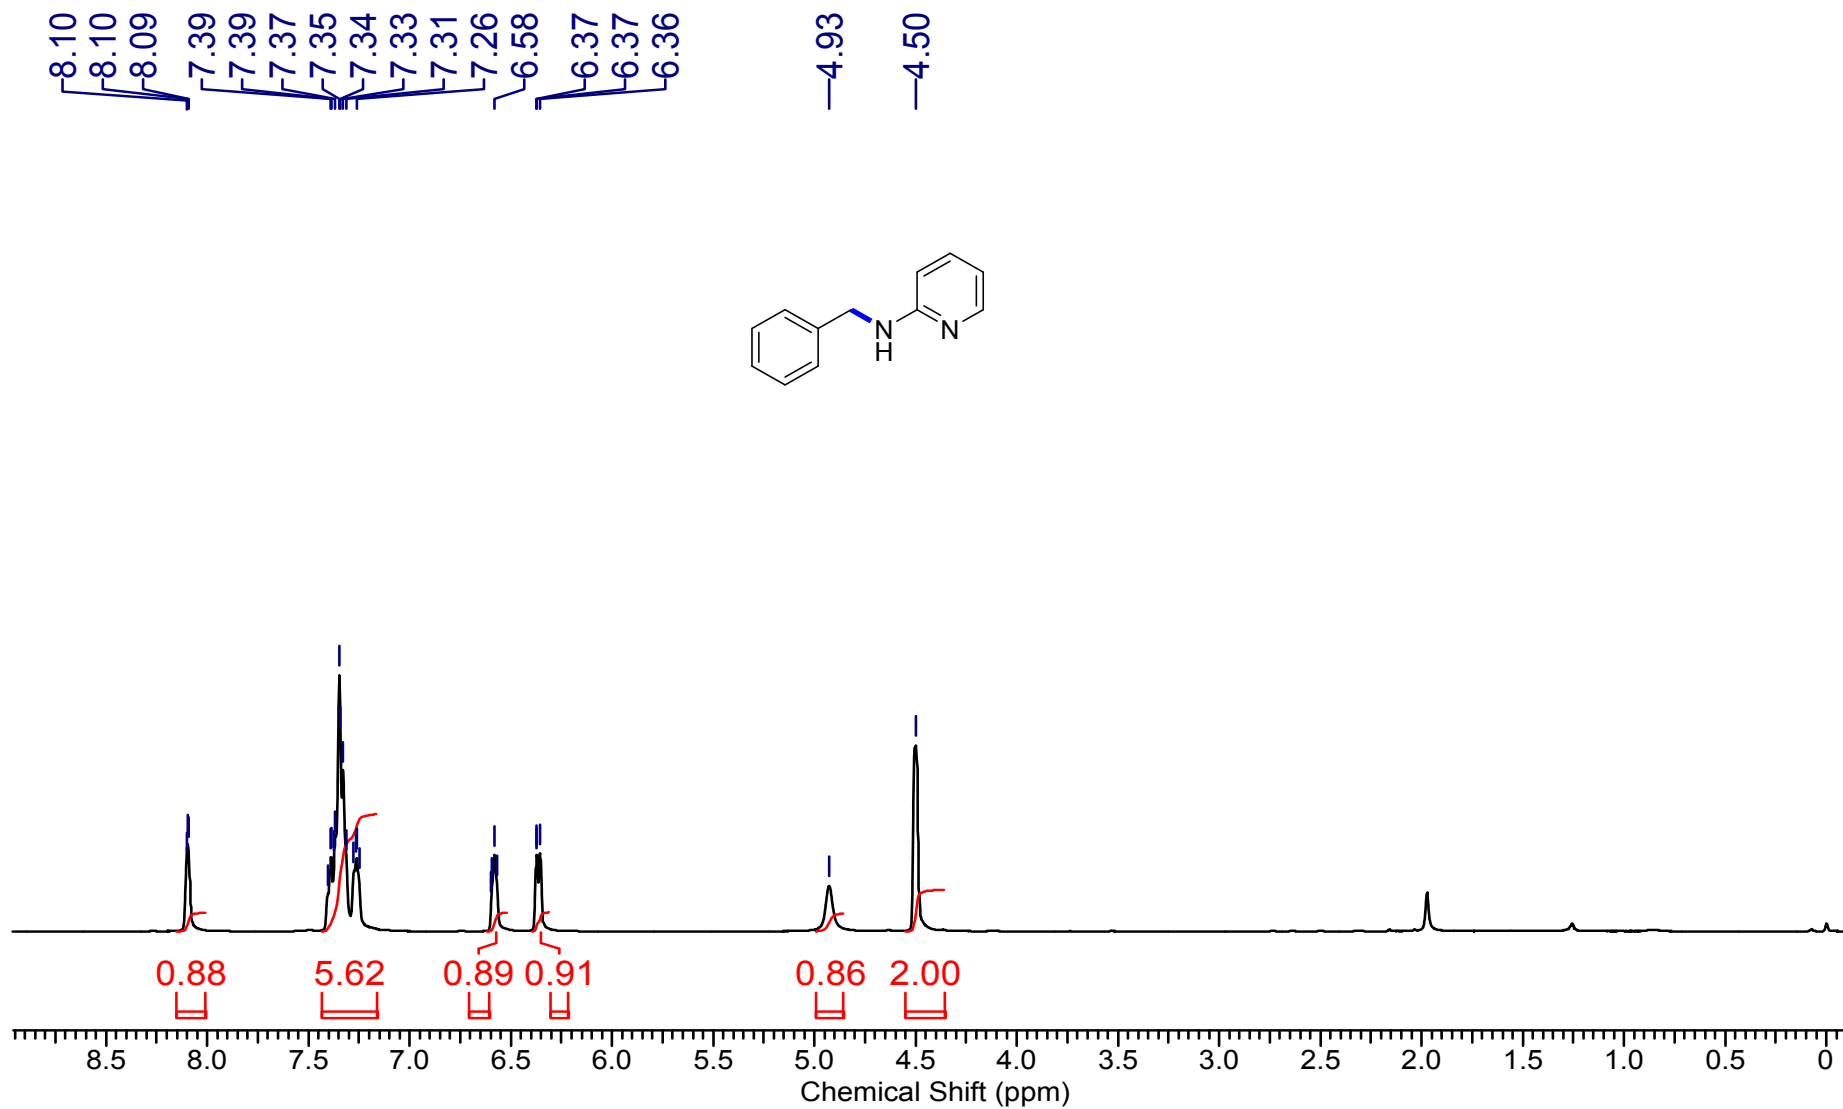

Figure S51.  $^1\text{H}$  of 6k

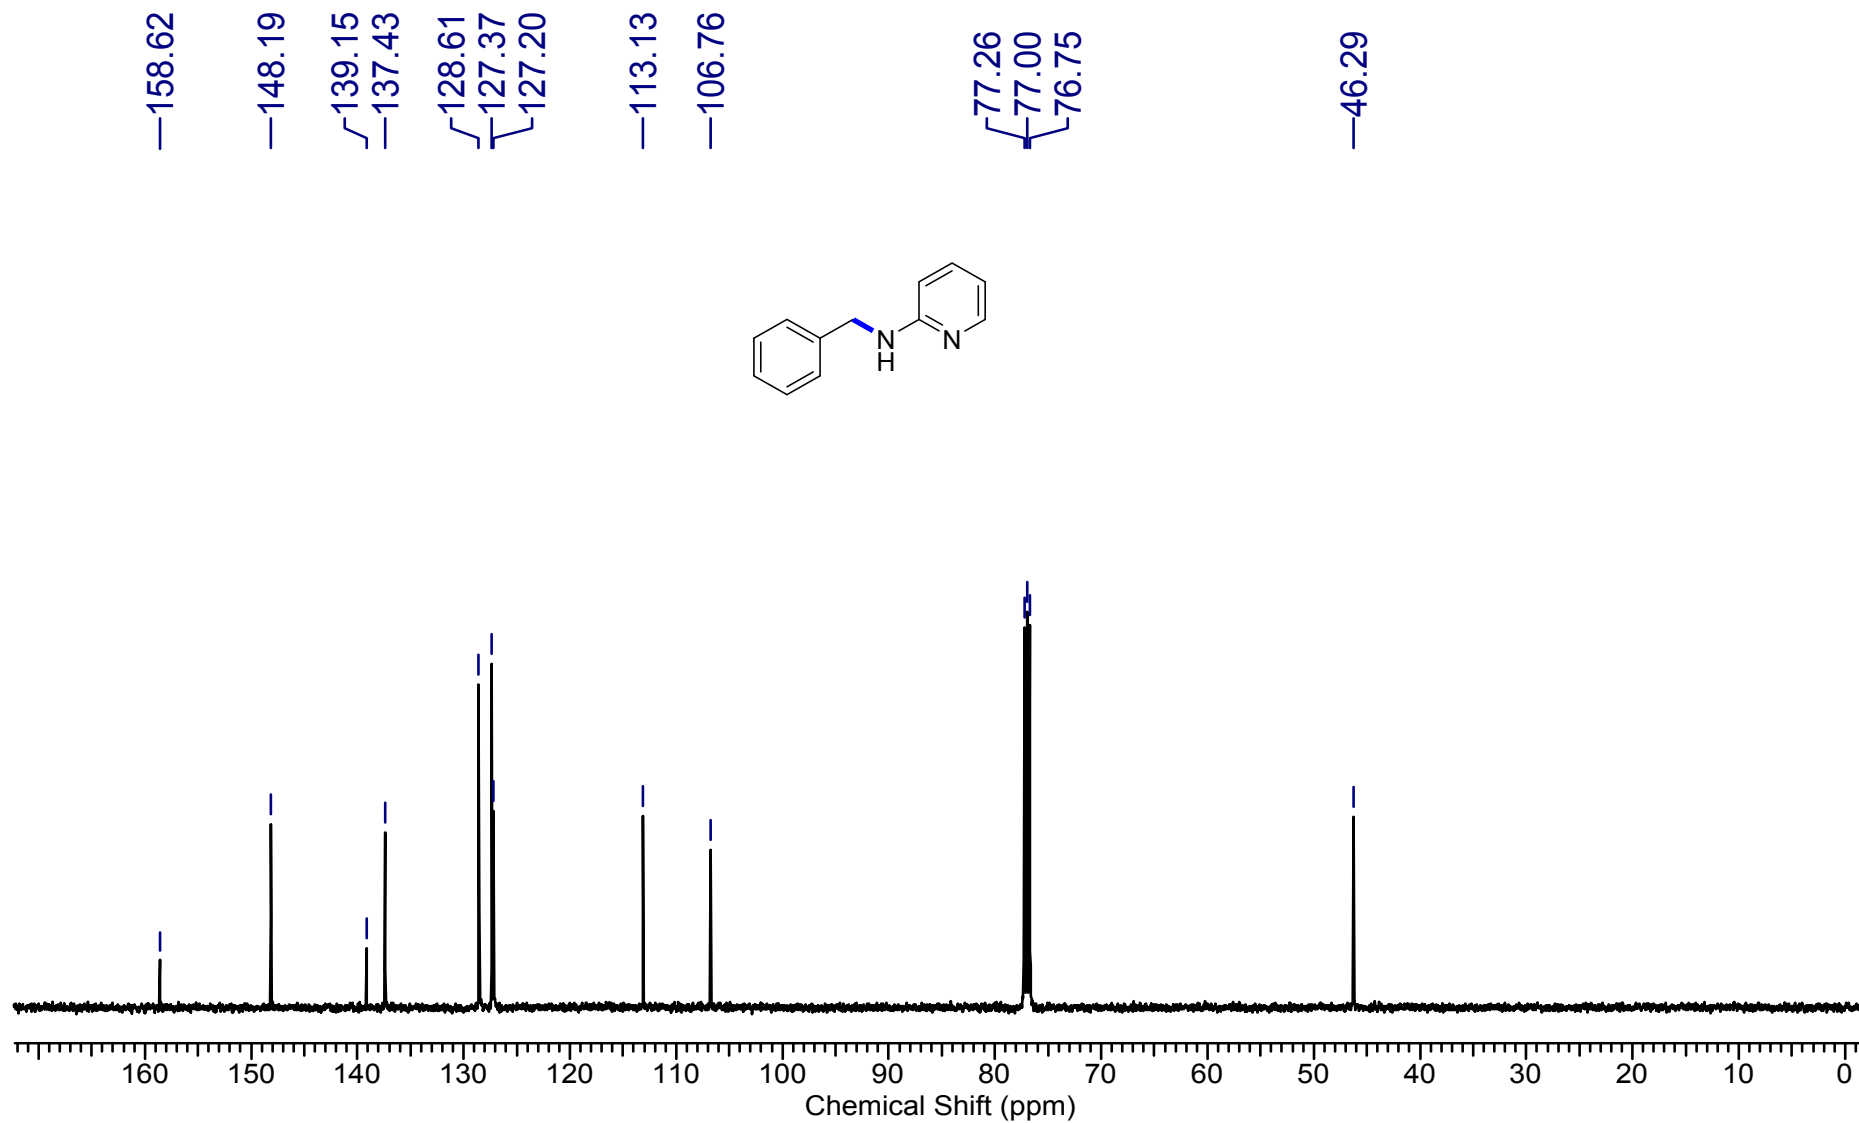

Figure S52. <sup>13</sup>C of 6k

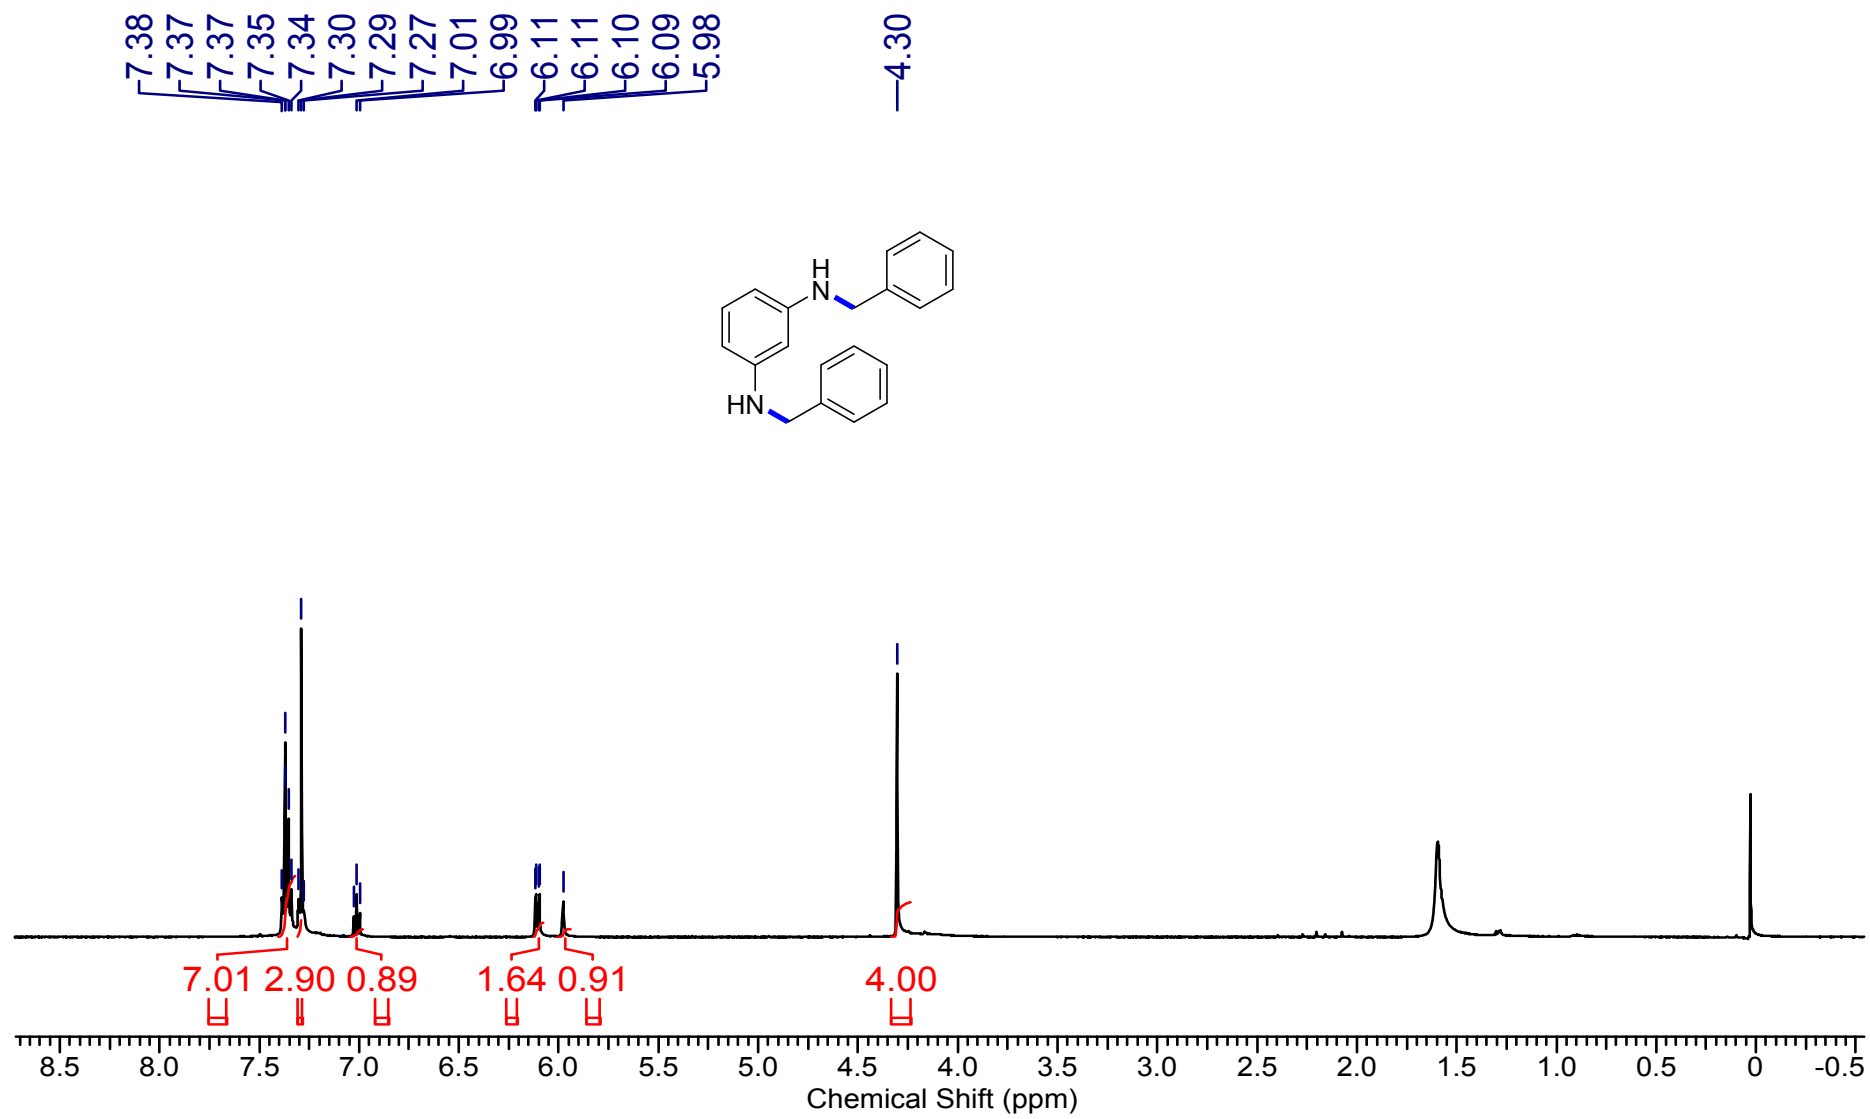

Figure S53.  $^1\text{H}$  of **8a**

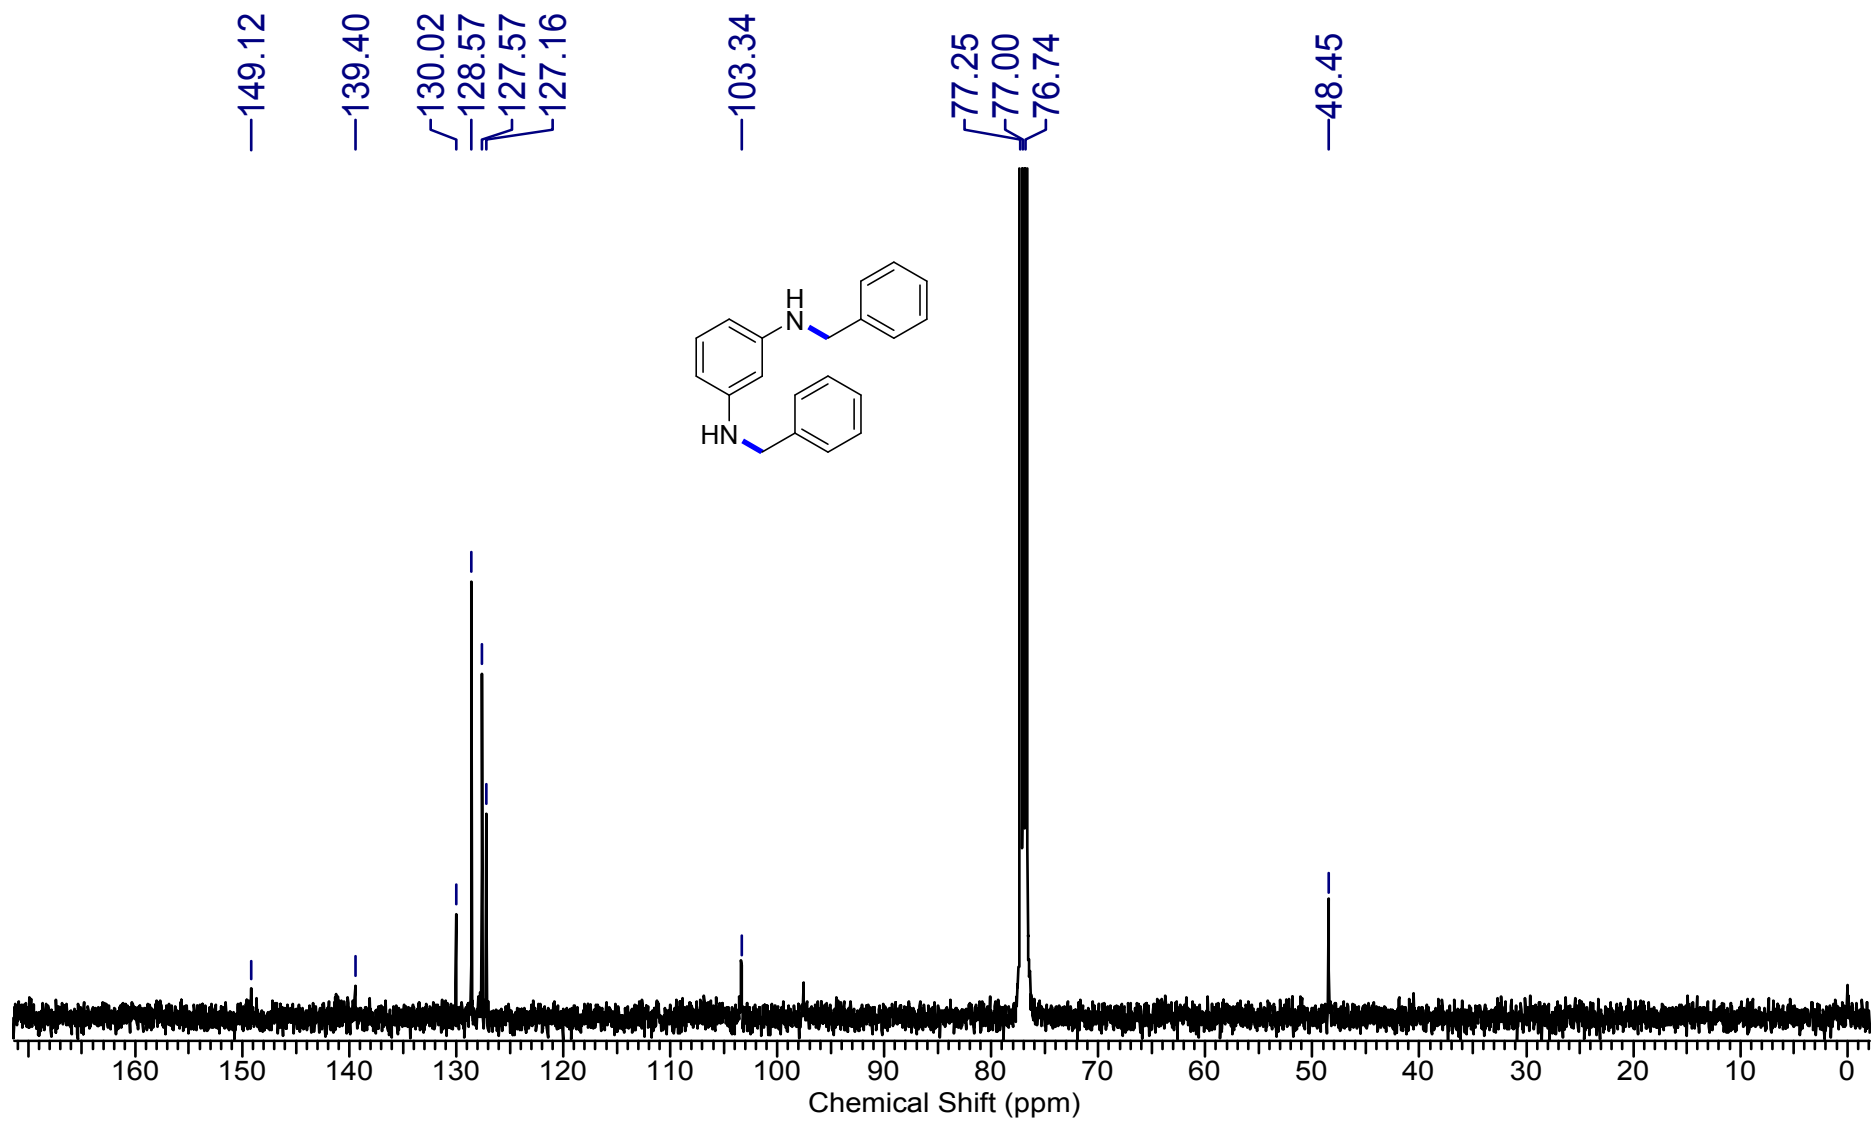

Figure S54.  $^{13}\text{C}$  of 8a



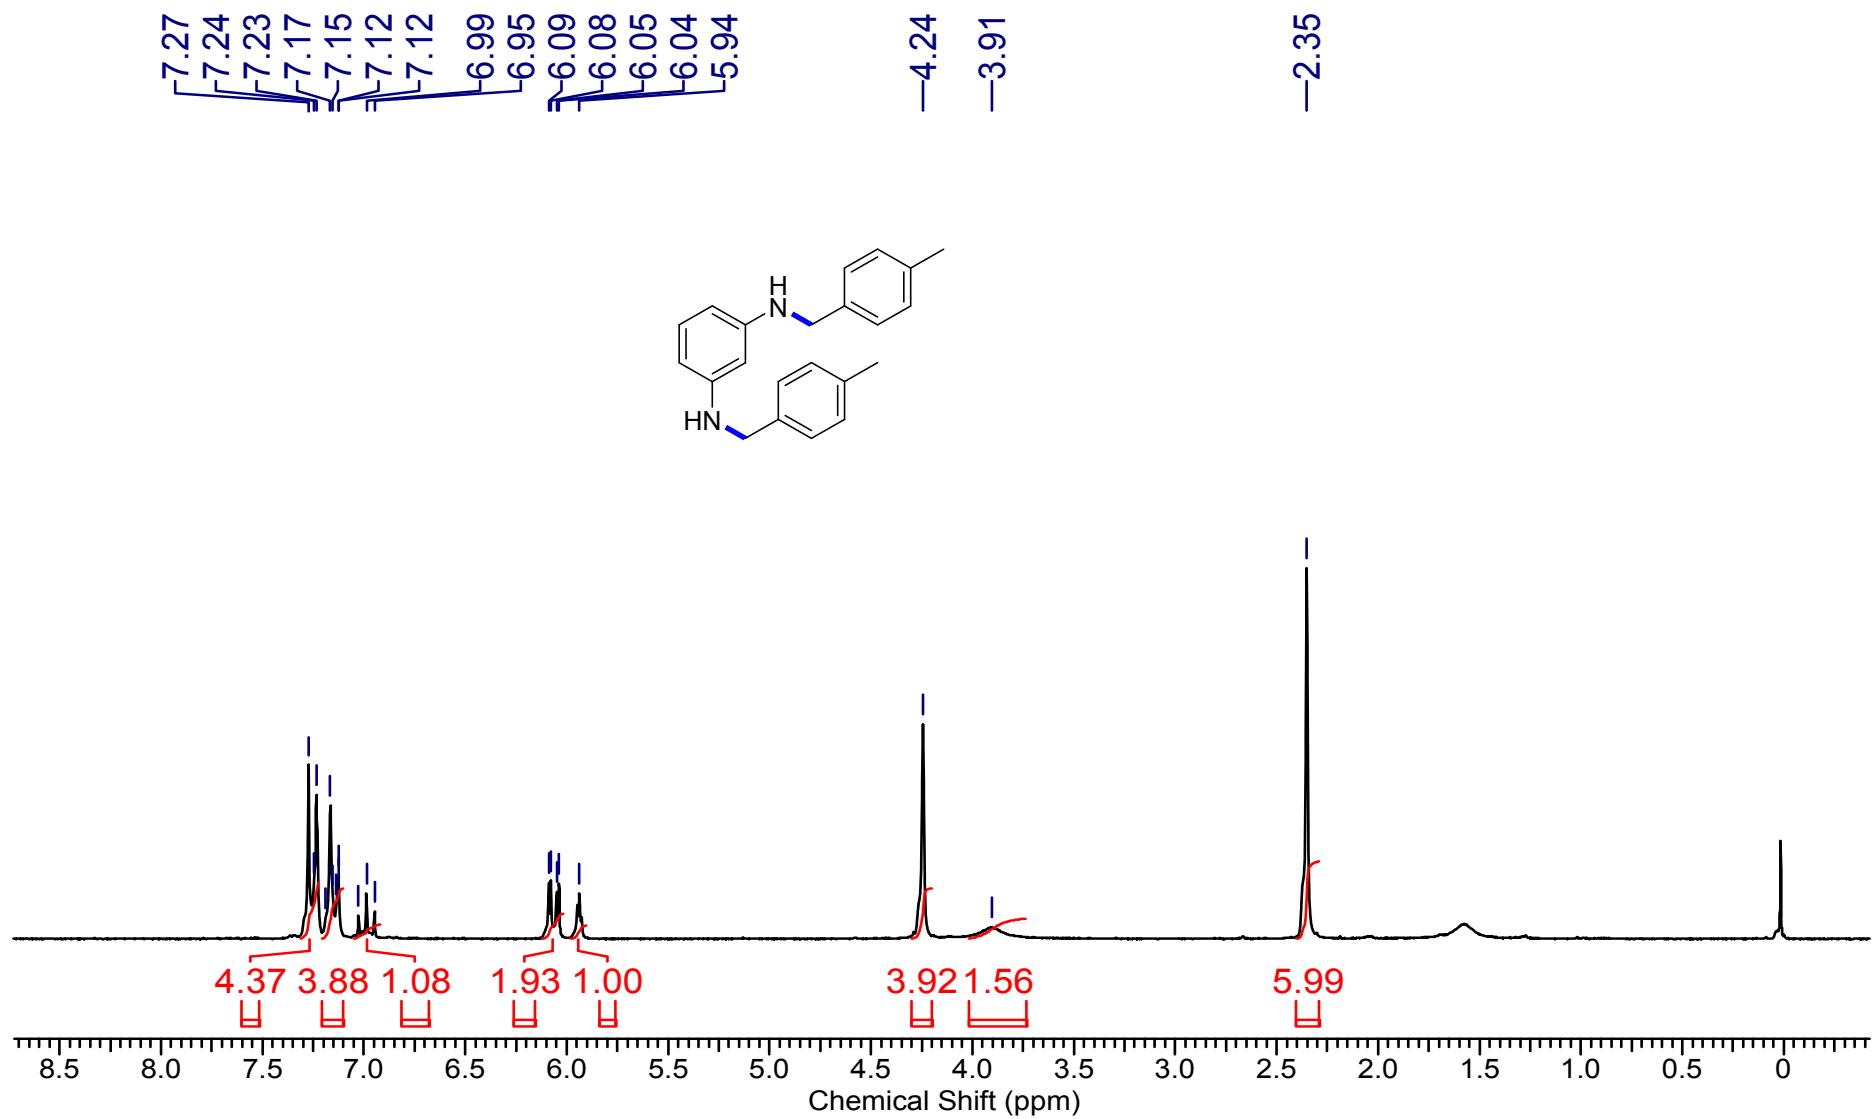

Figure S55.  $^1\text{H}$  of **8b**

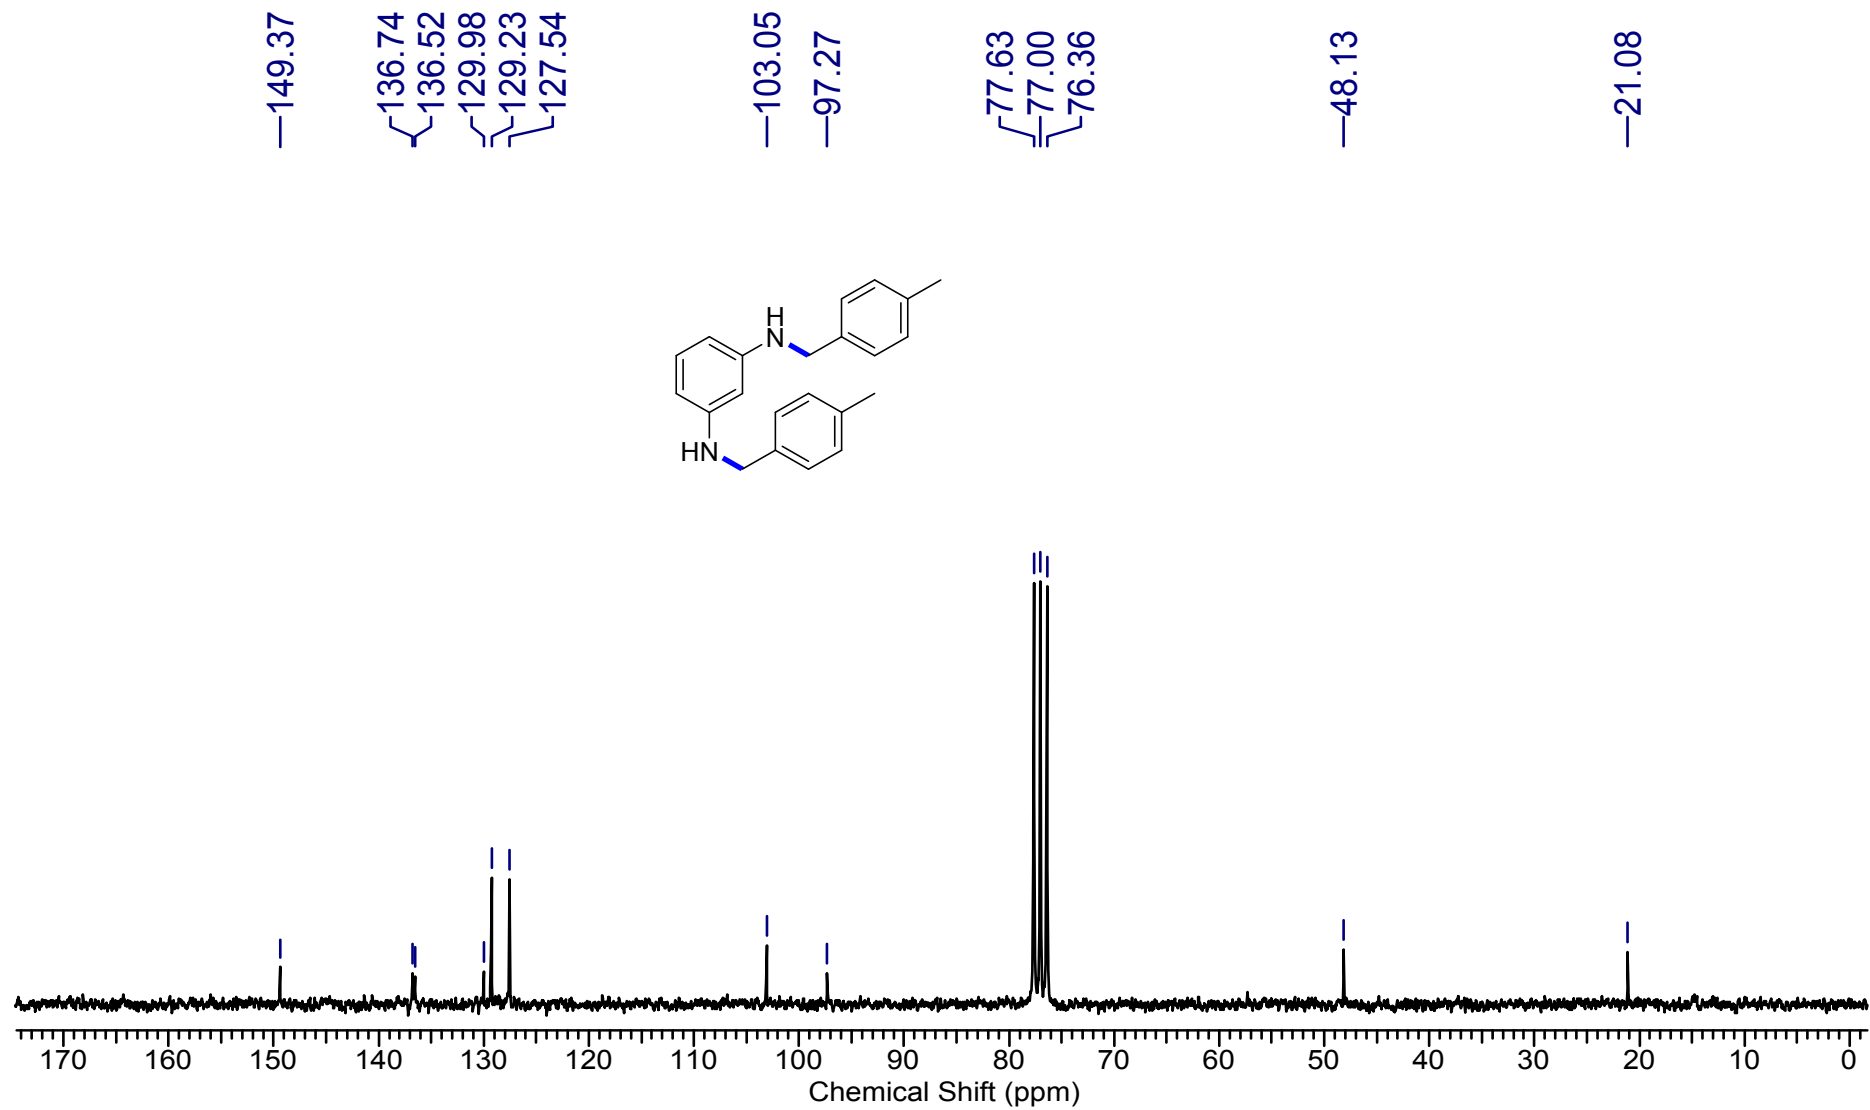

Figure S56. <sup>13</sup>C of 8b

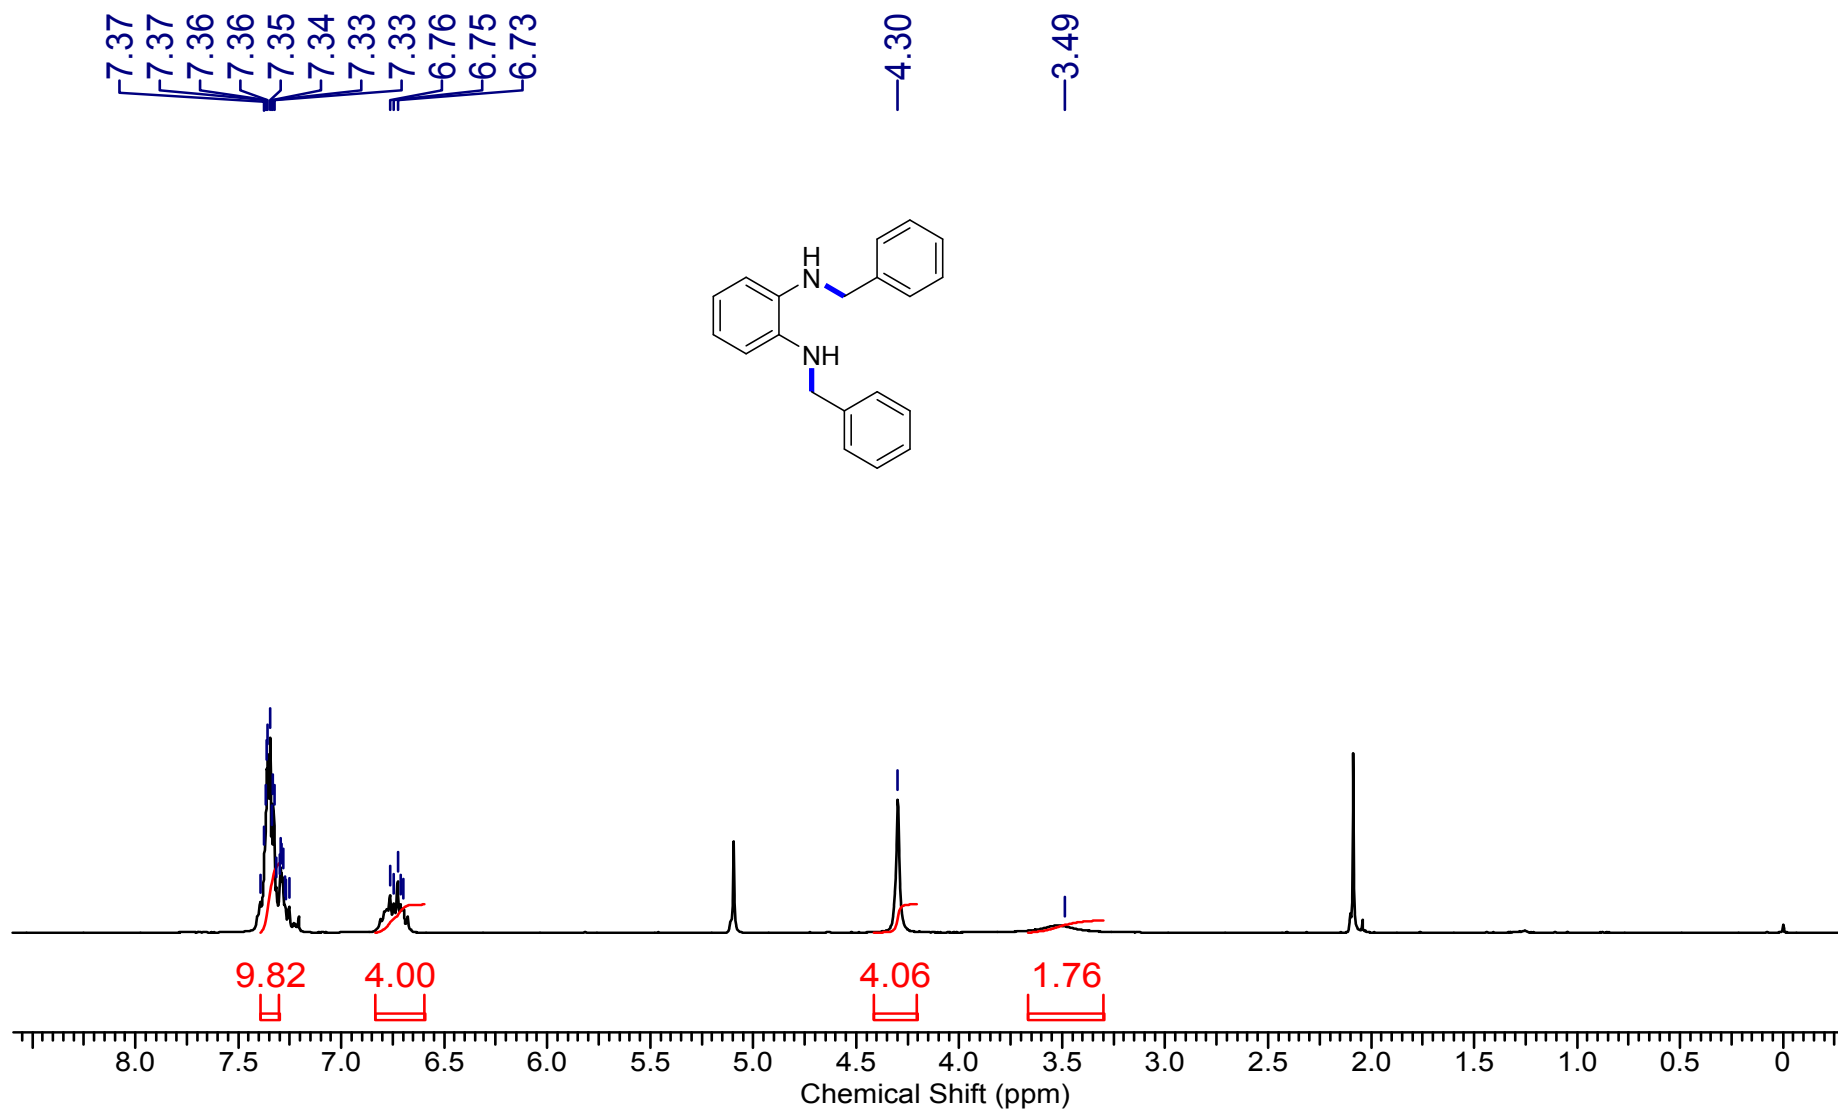

Figure S57.  $^1\text{H}$  of **8c**

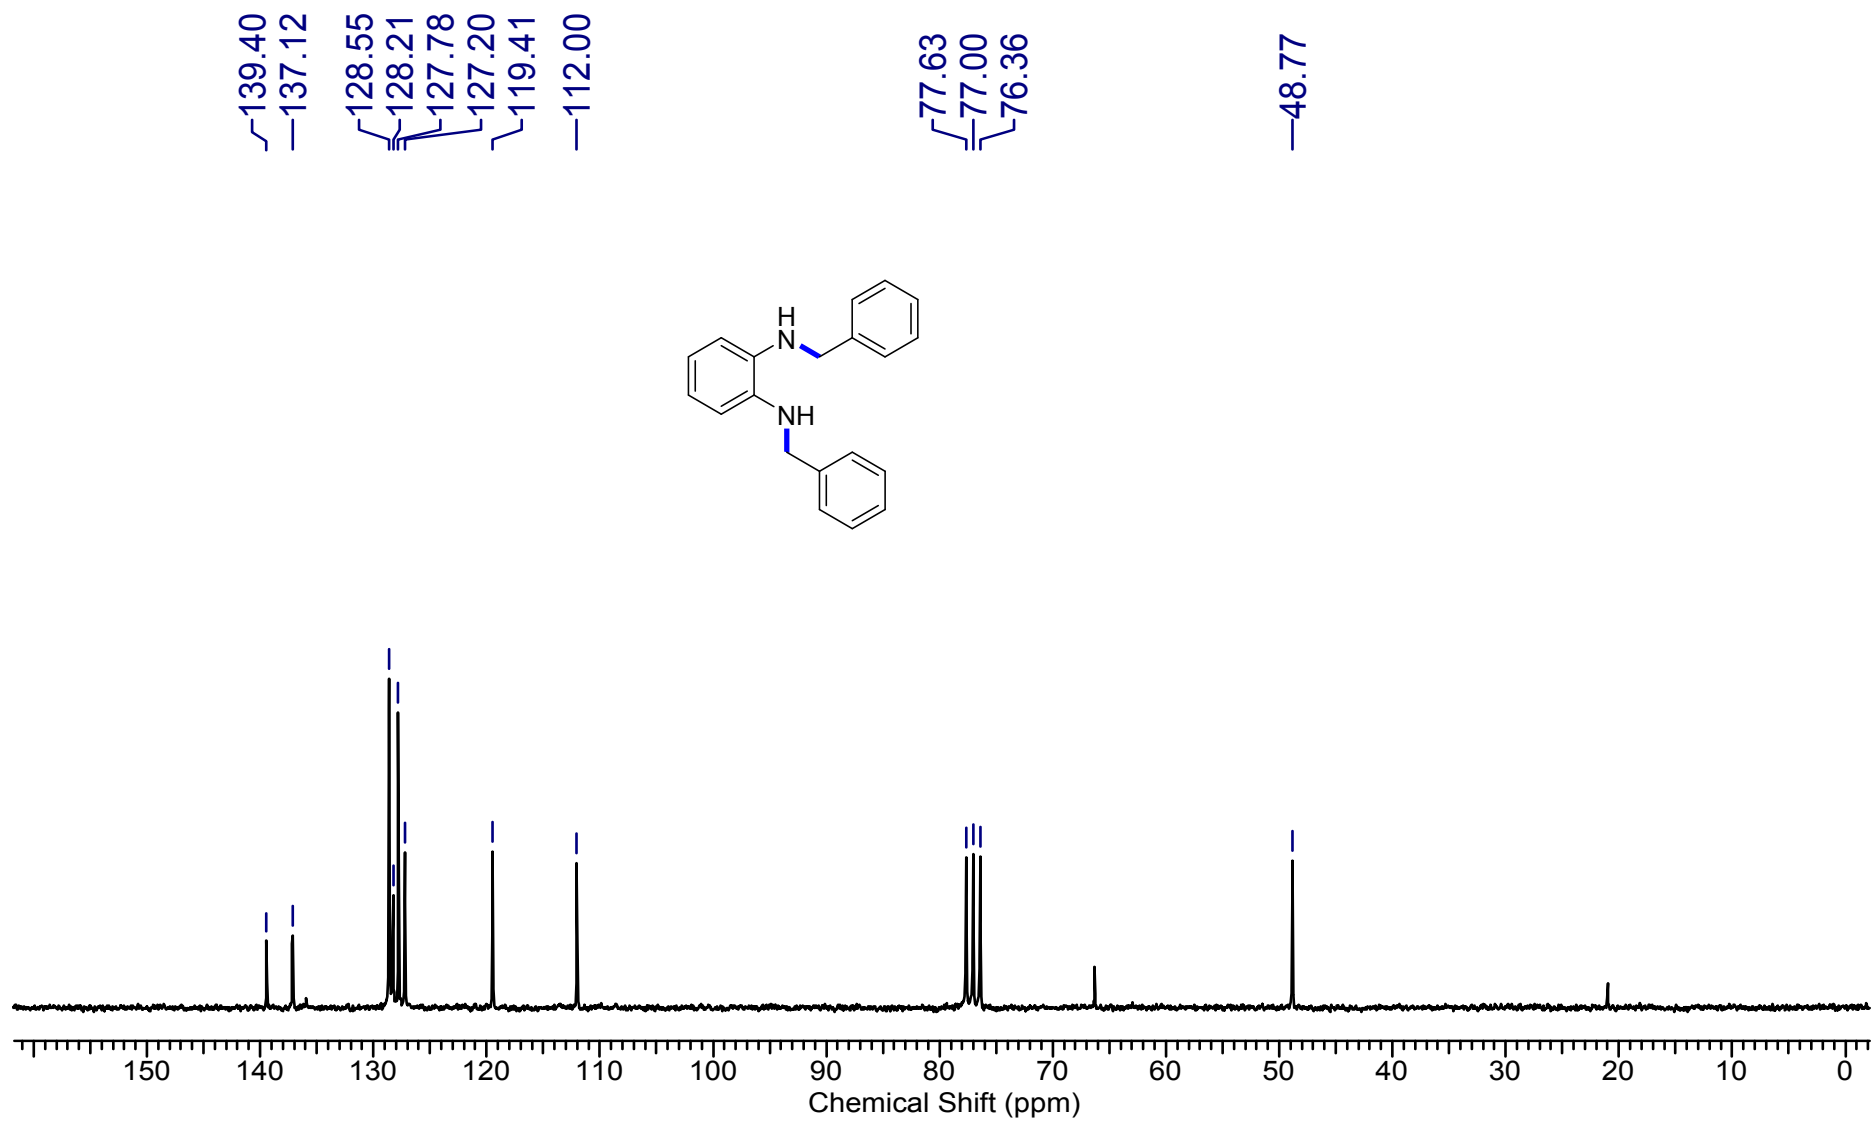

Figure S58. <sup>13</sup>C of 8c

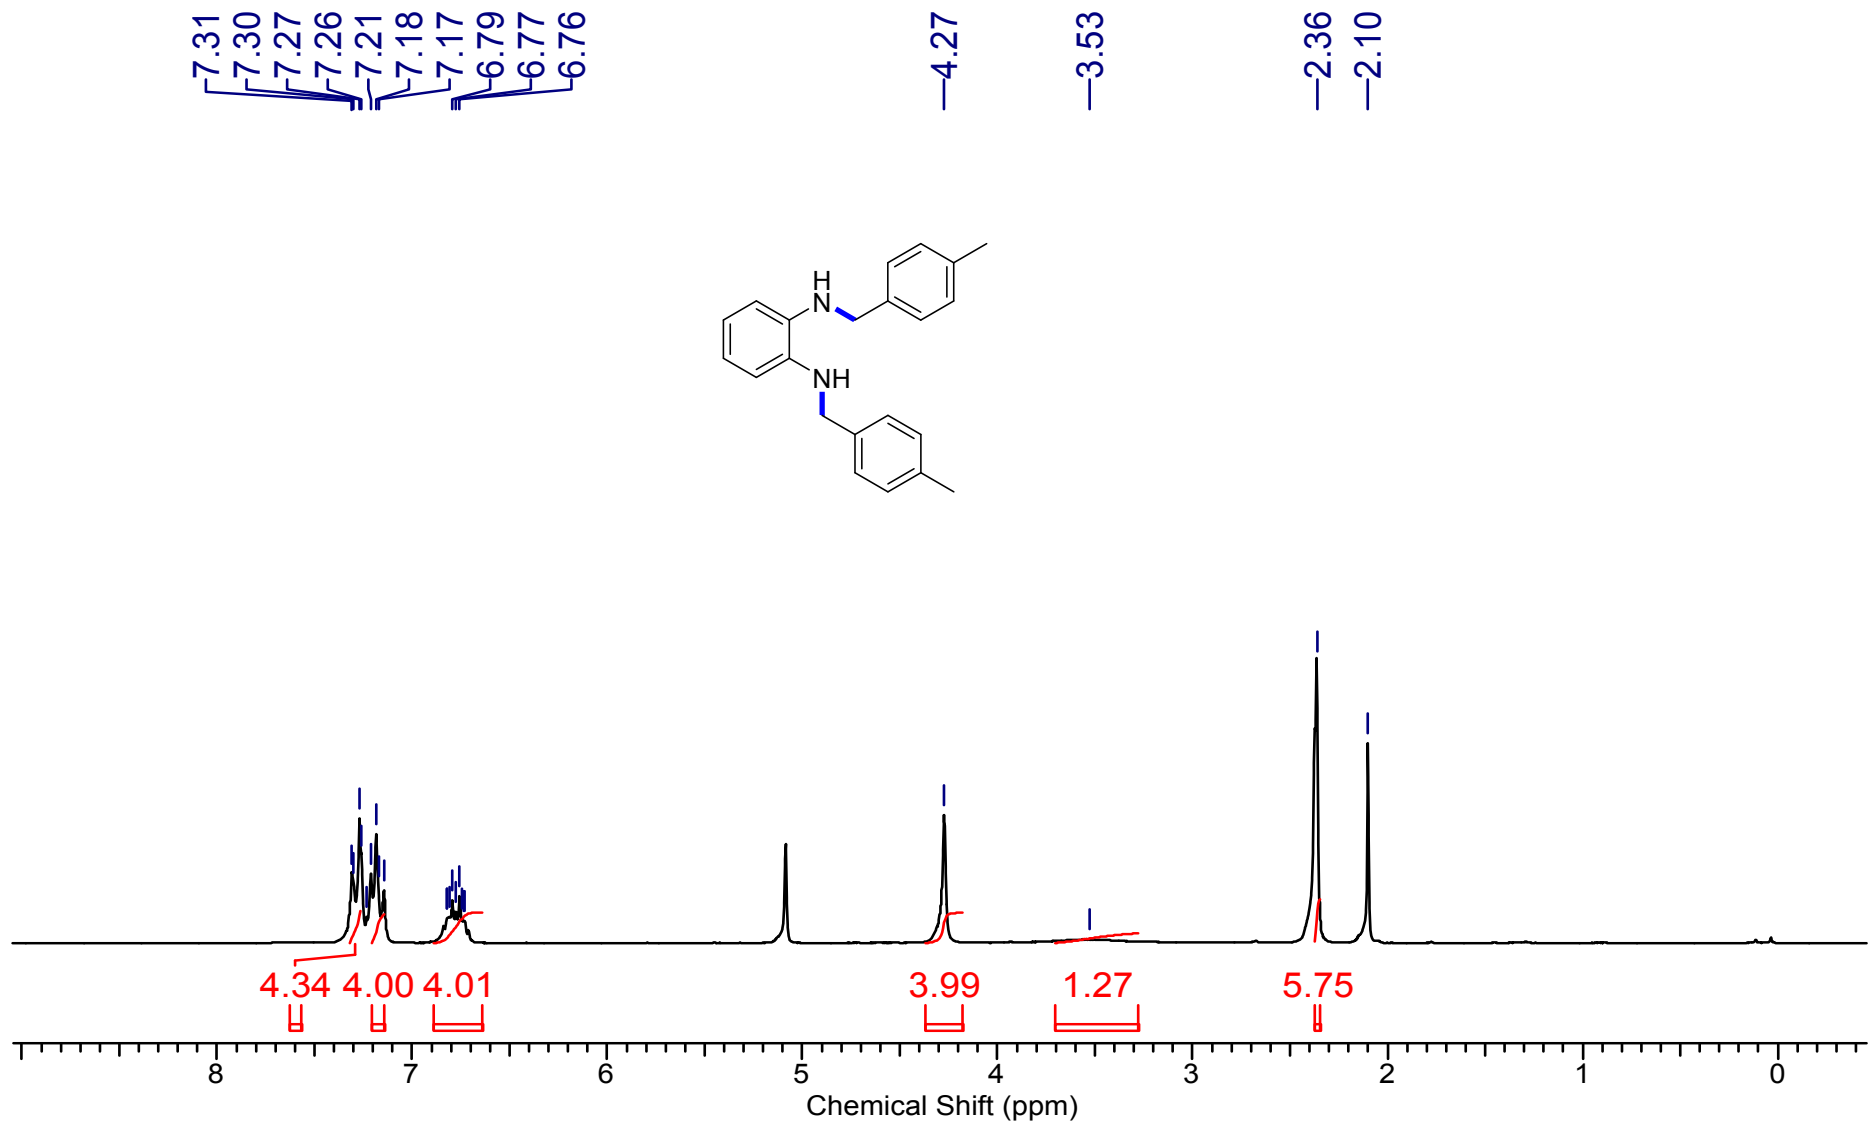

Figure S59. <sup>1</sup>H of 8d

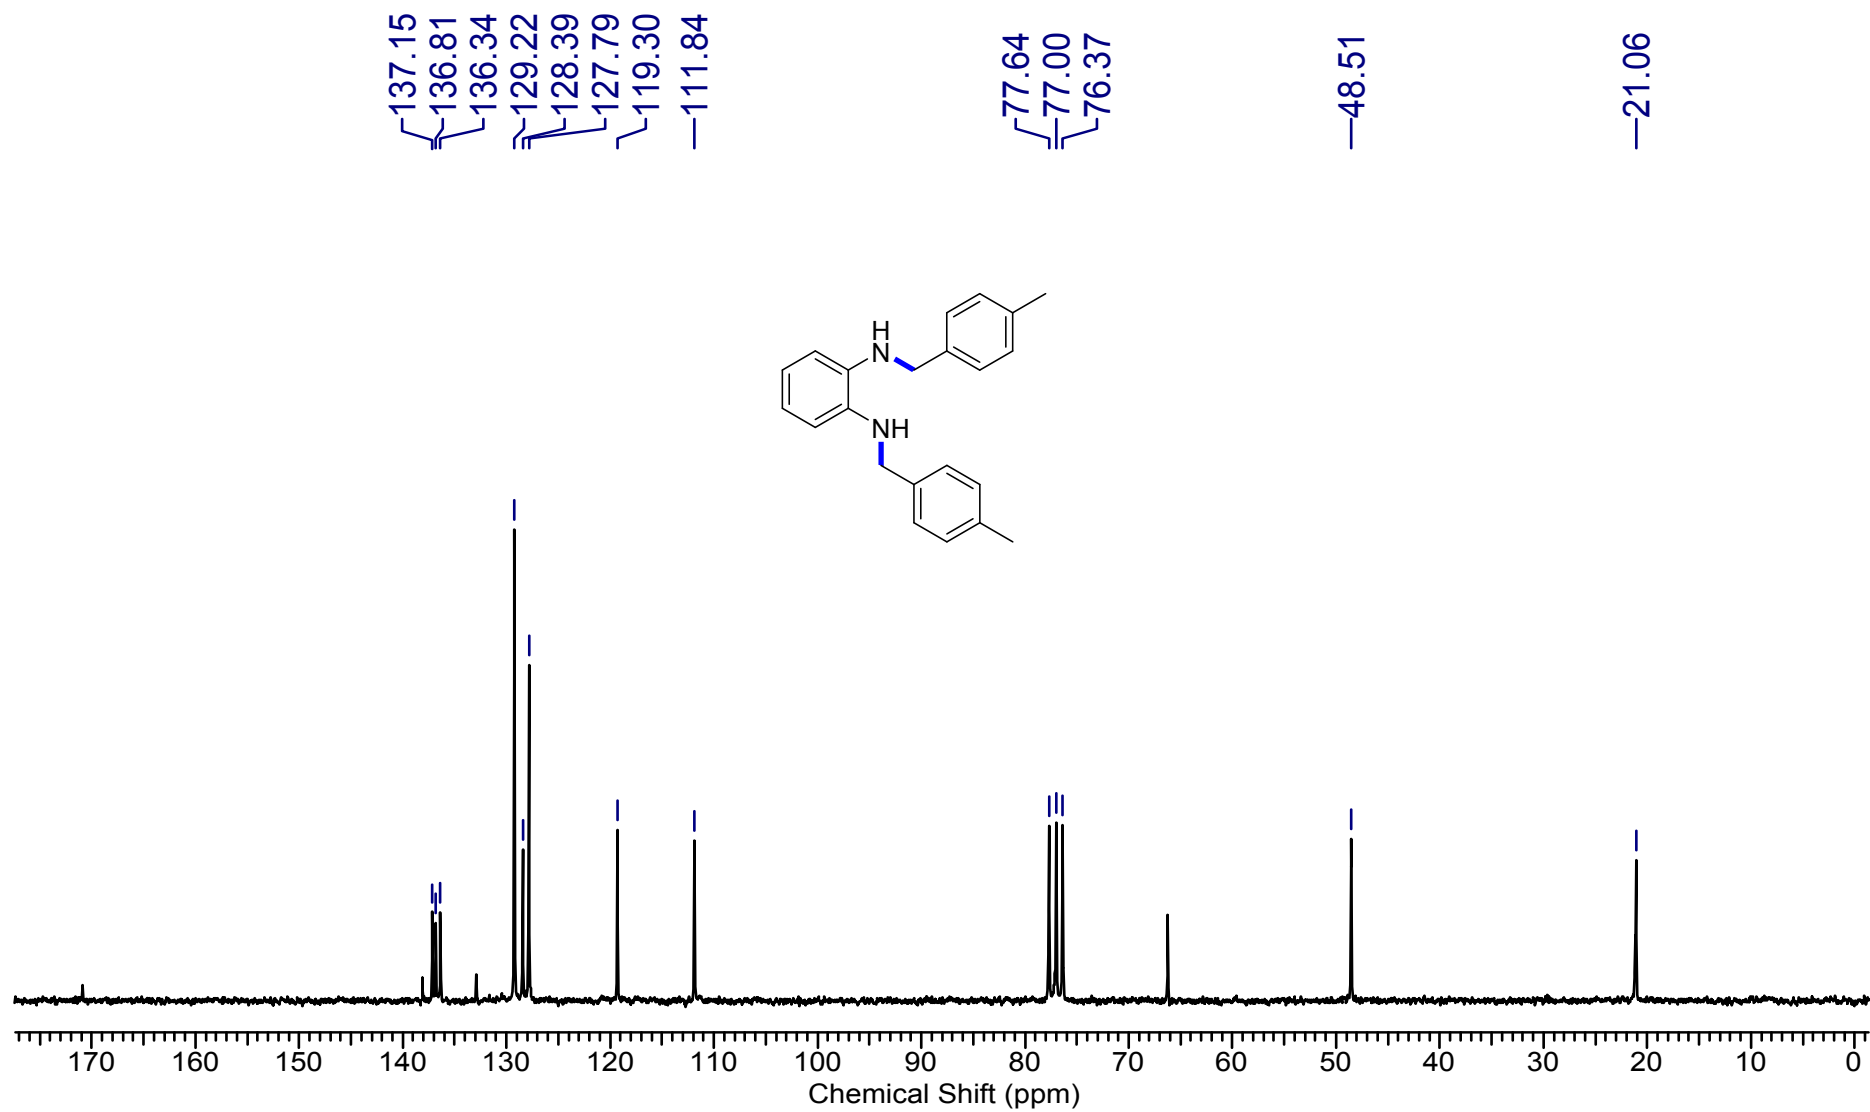

Figure S60.  $^{13}\text{C}$  of 8d

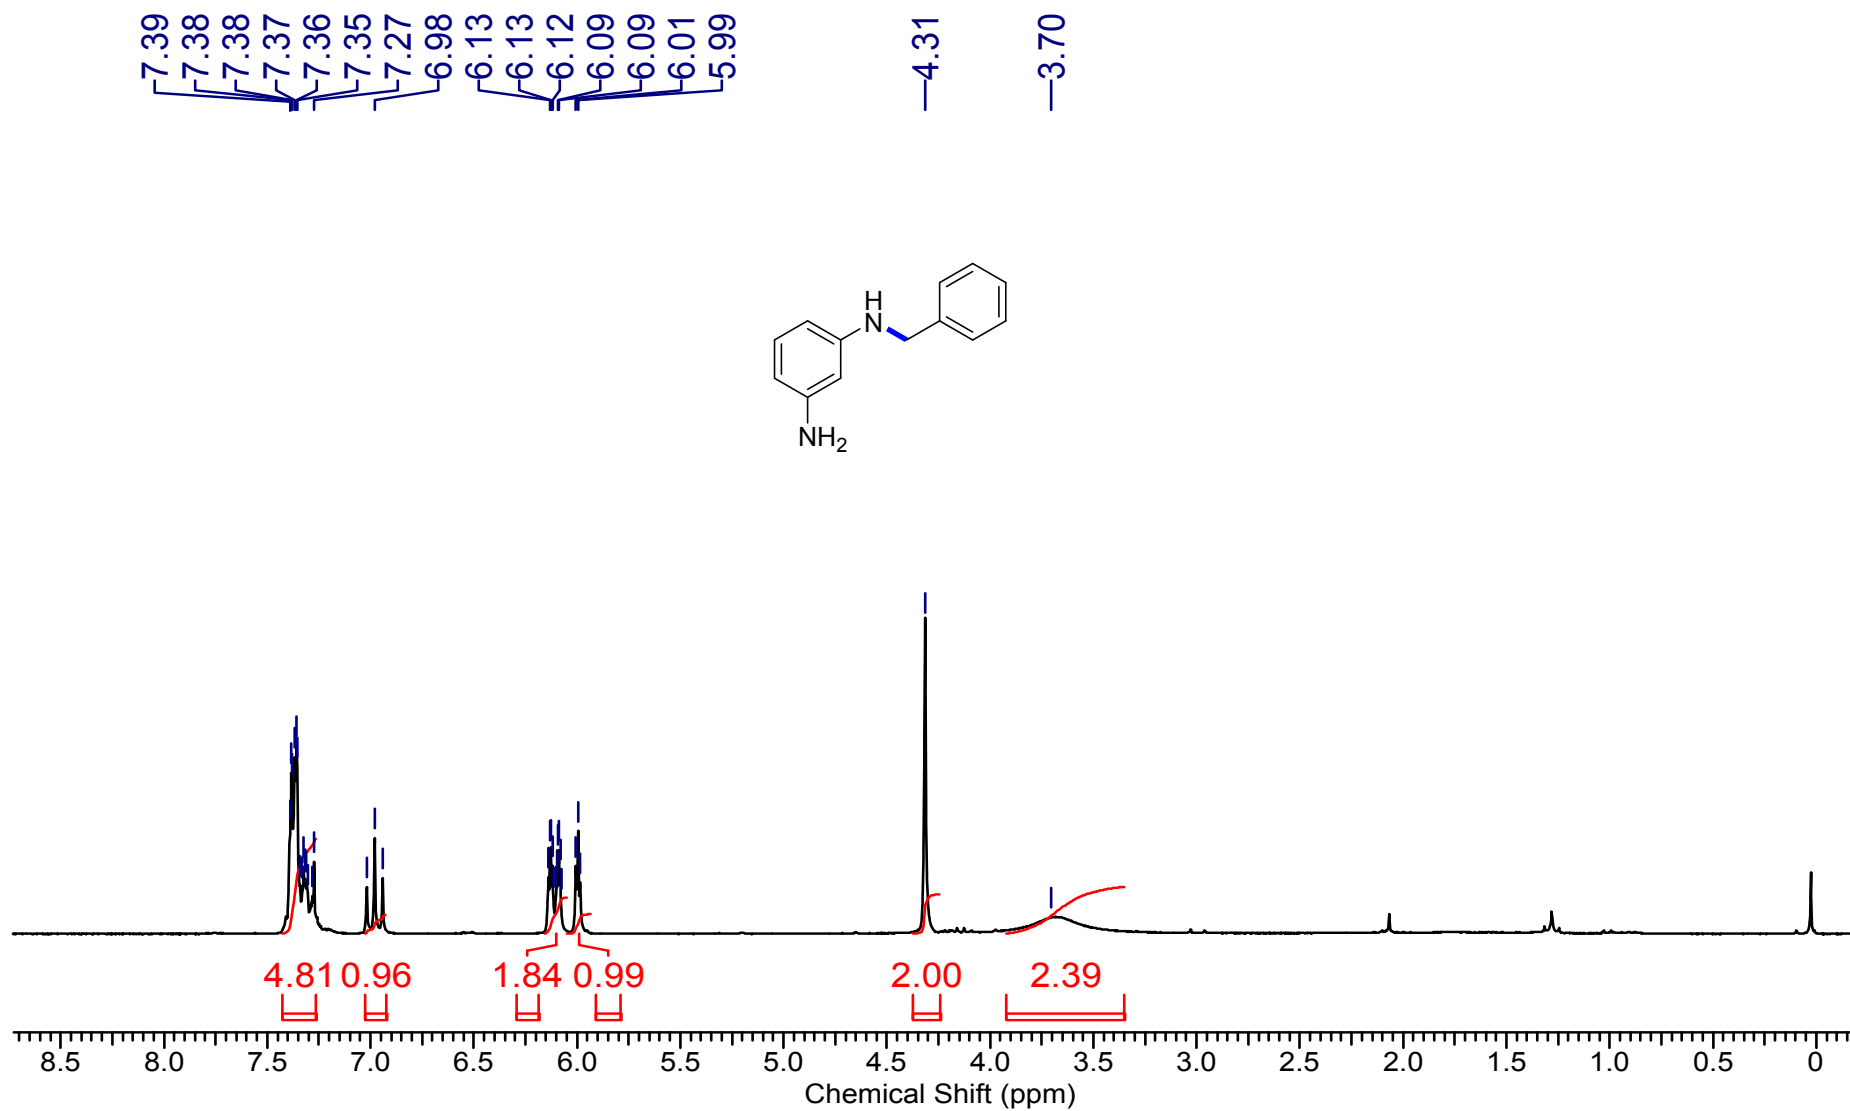

Figure S61. <sup>1</sup>H of 9a

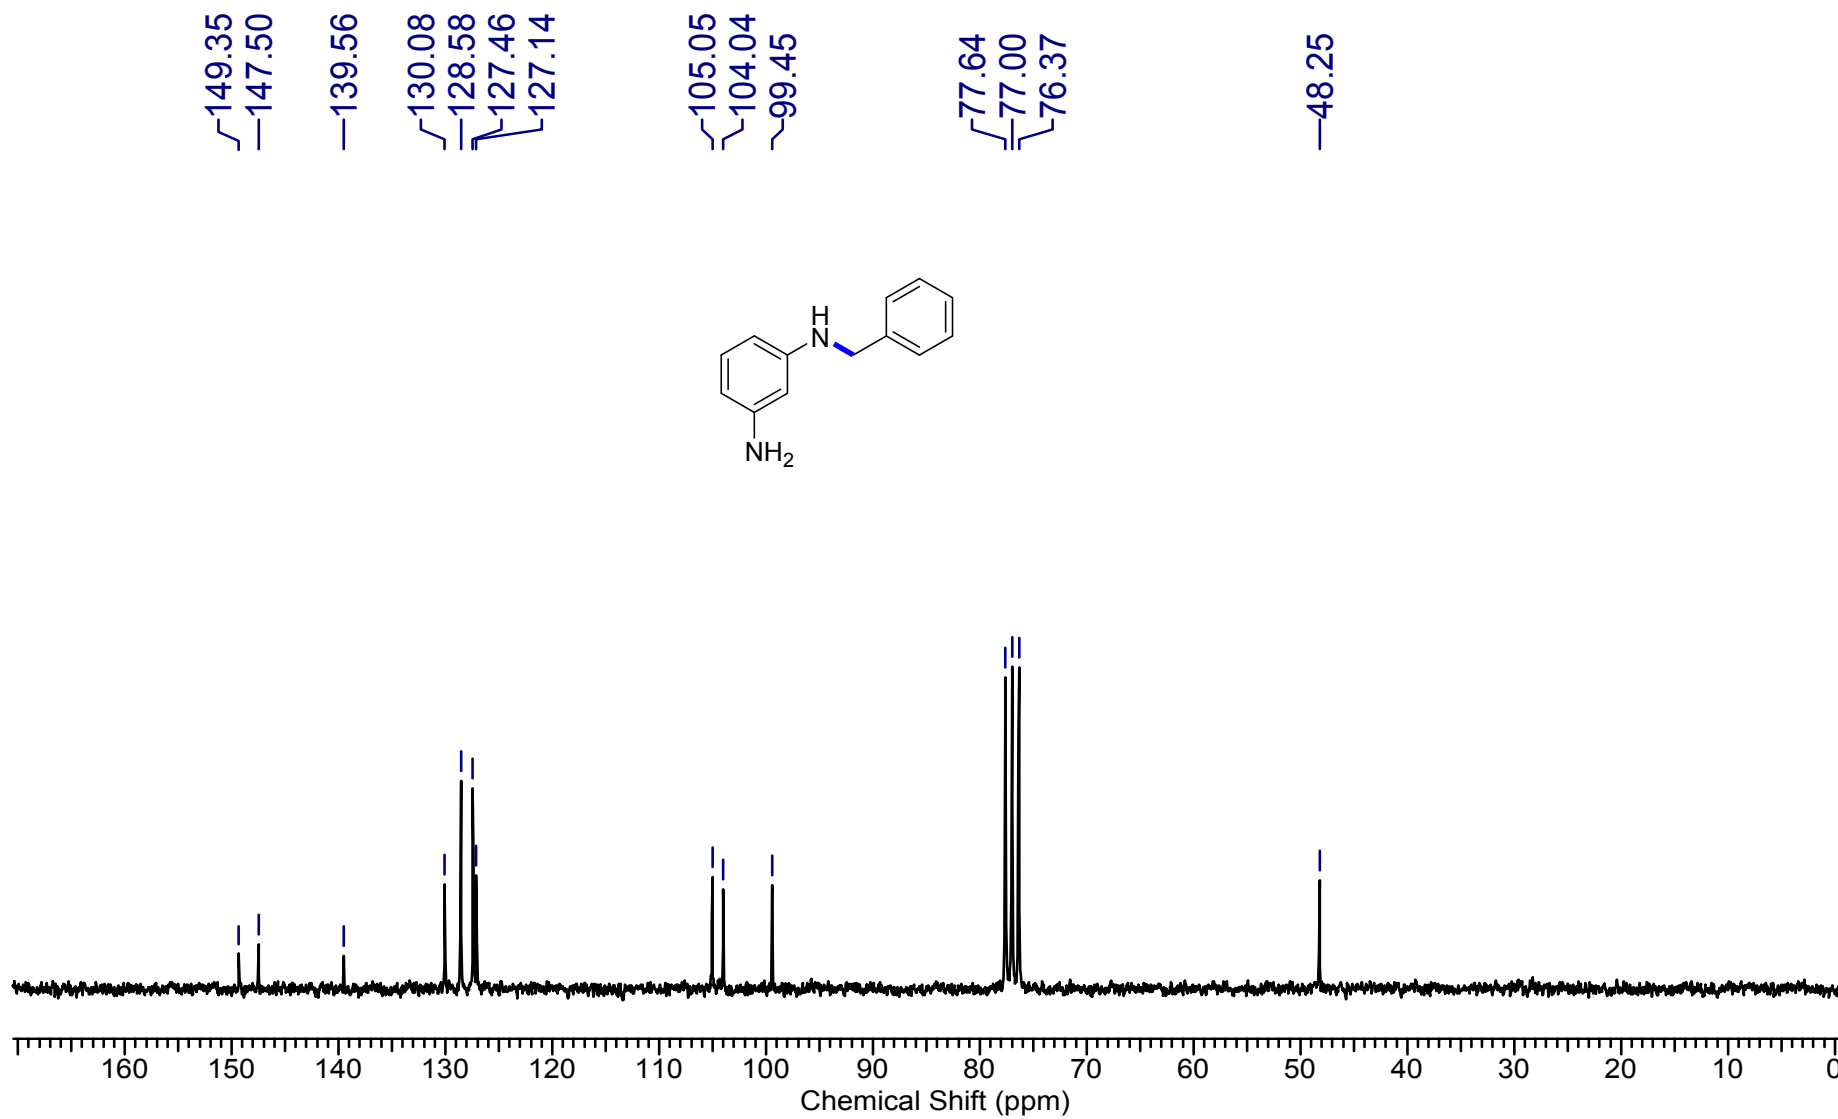

Figure S62.  $^{13}\text{C}$  of 9a



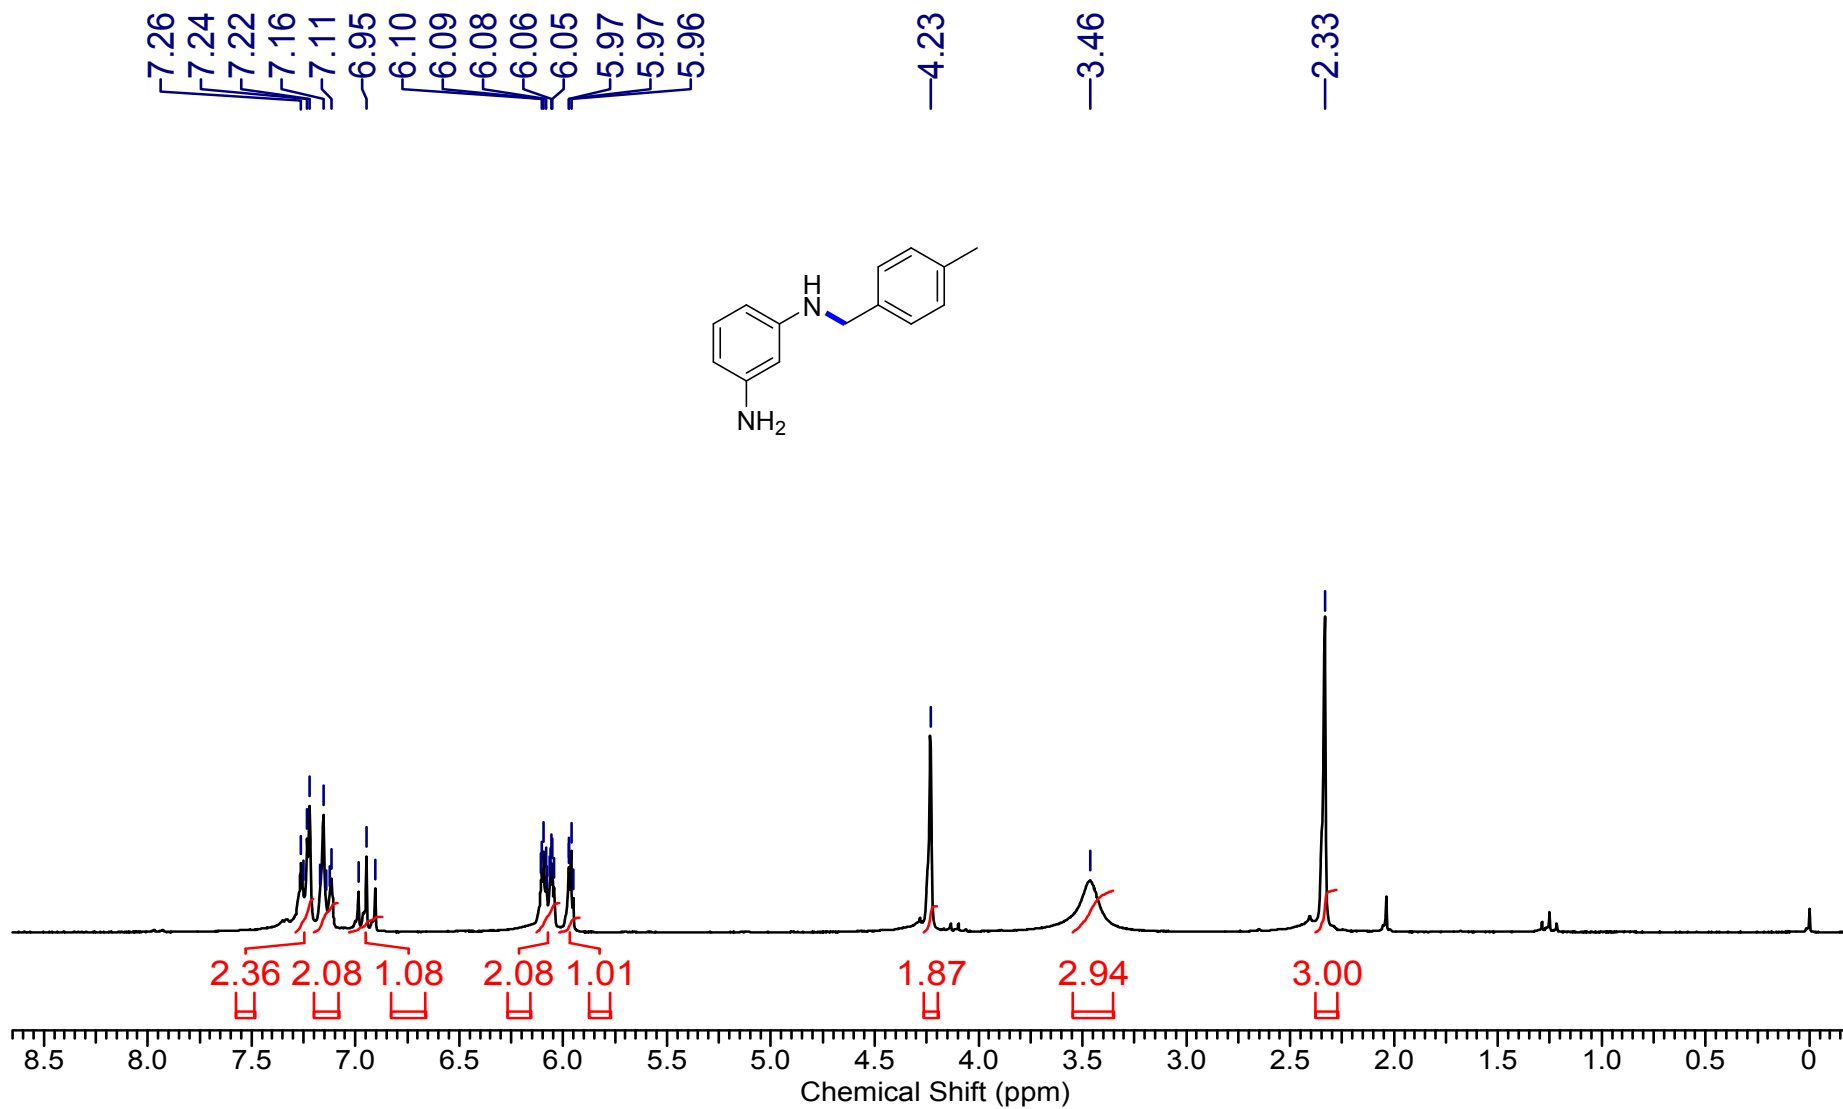

Figure S63. <sup>1</sup>H of 9b

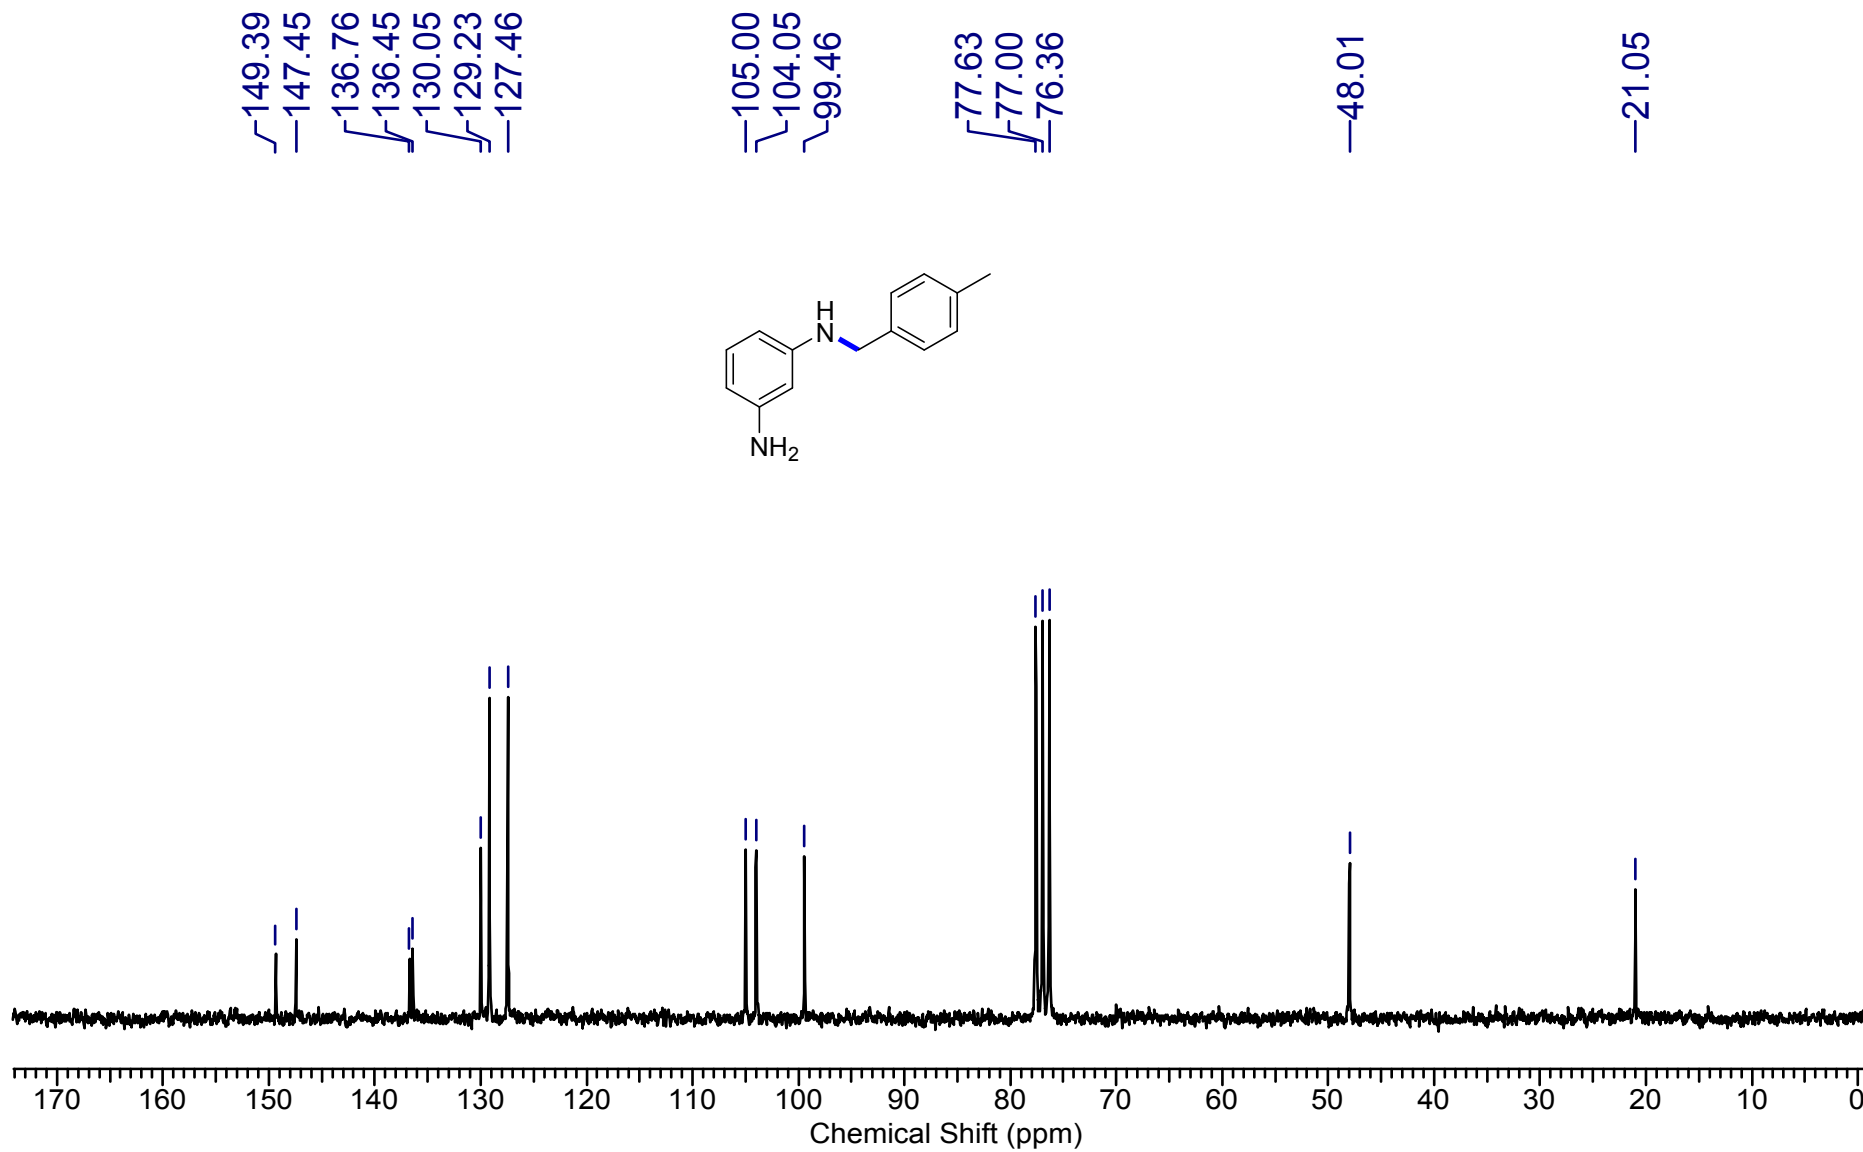

Figure S64.  $^{13}\text{C}$  of 9b

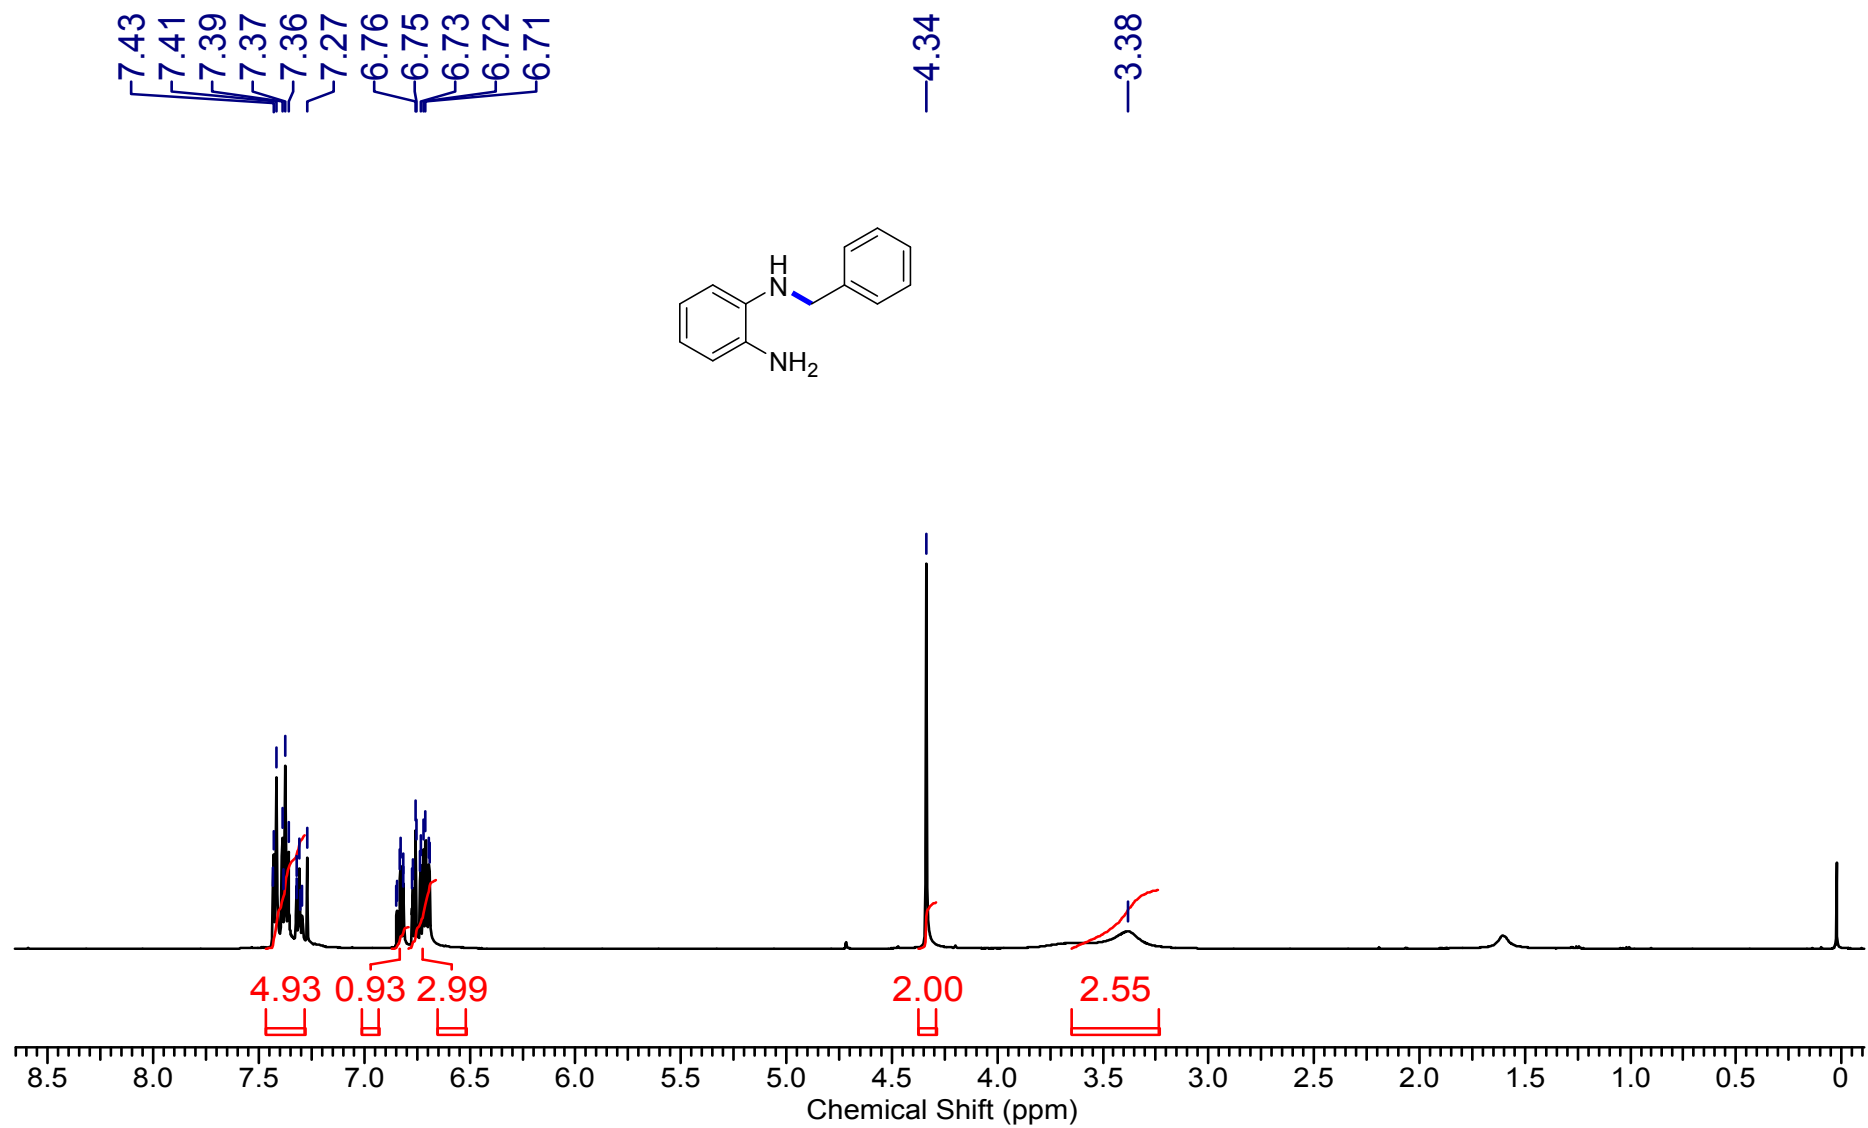

Figure S65. <sup>1</sup>H of **9c**

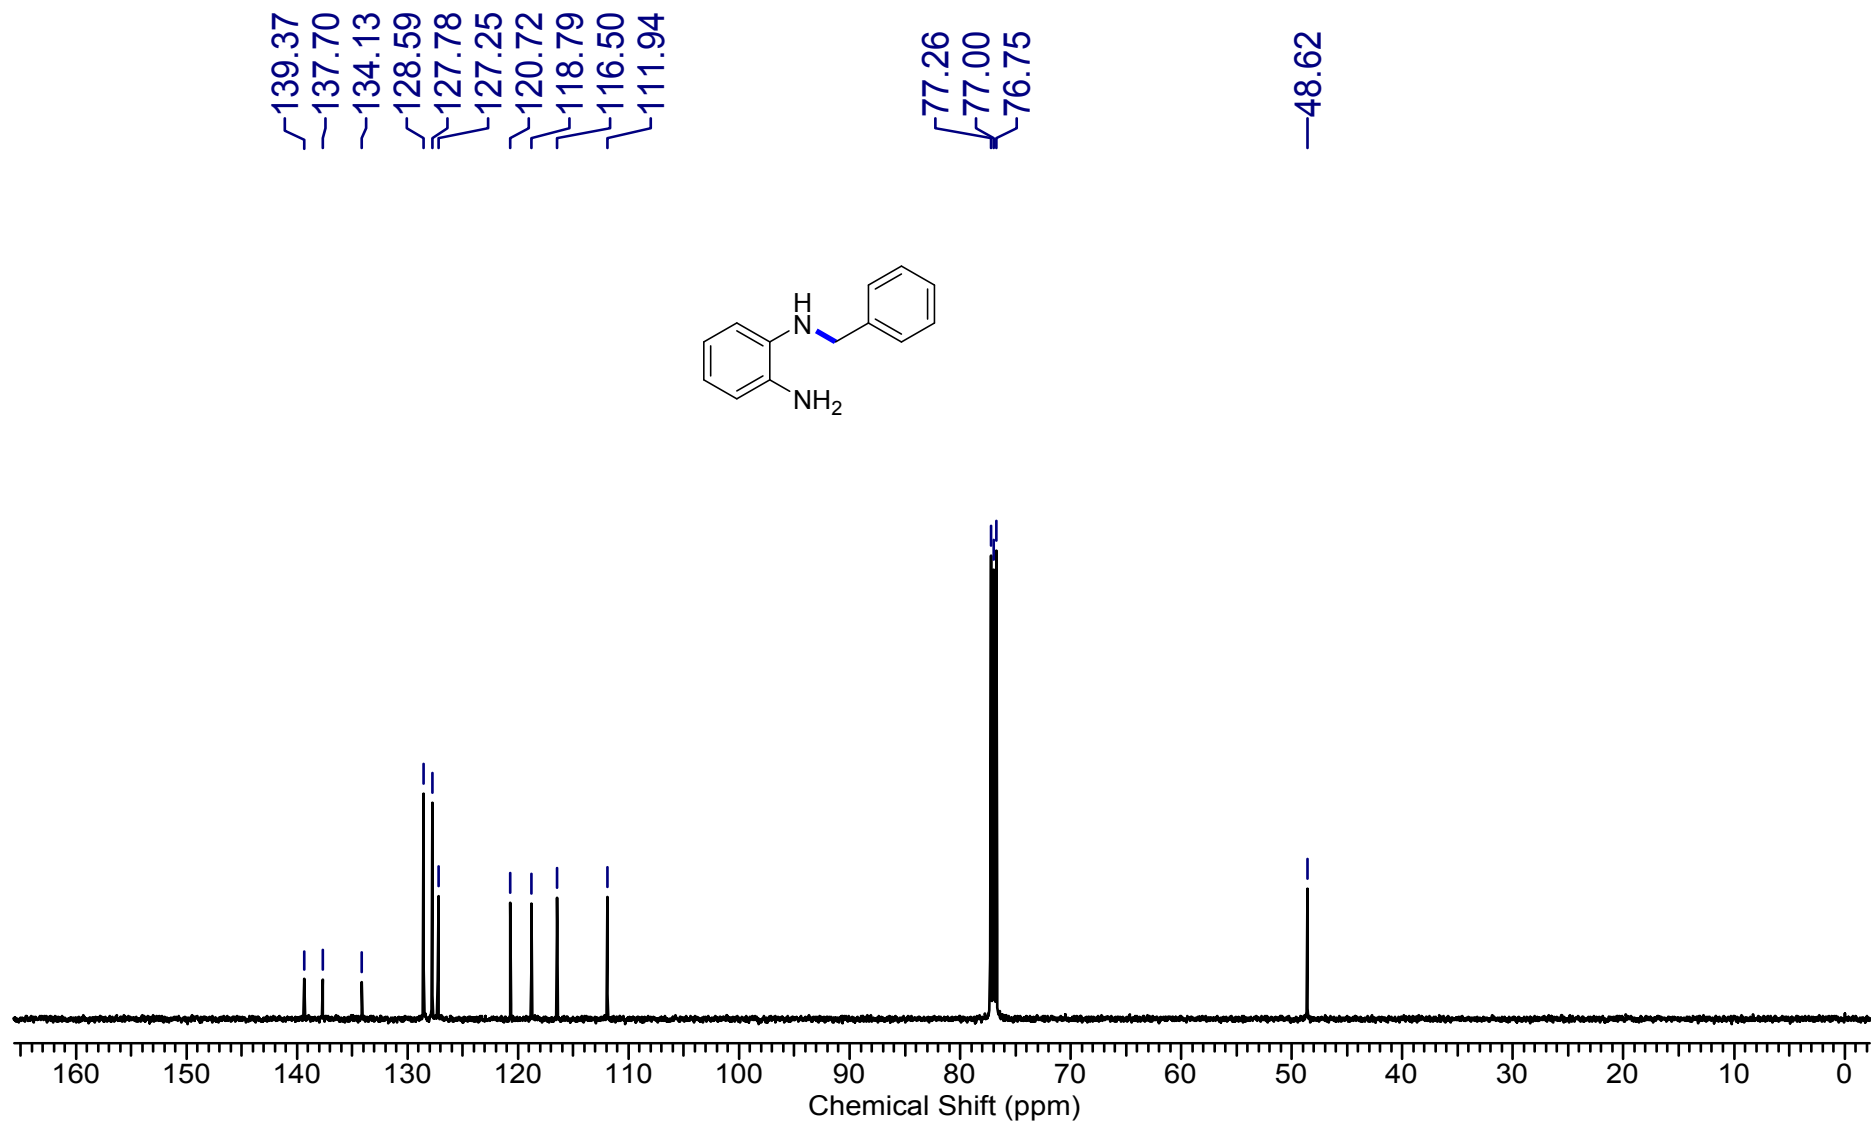

Figure S66. <sup>13</sup>C of 9c

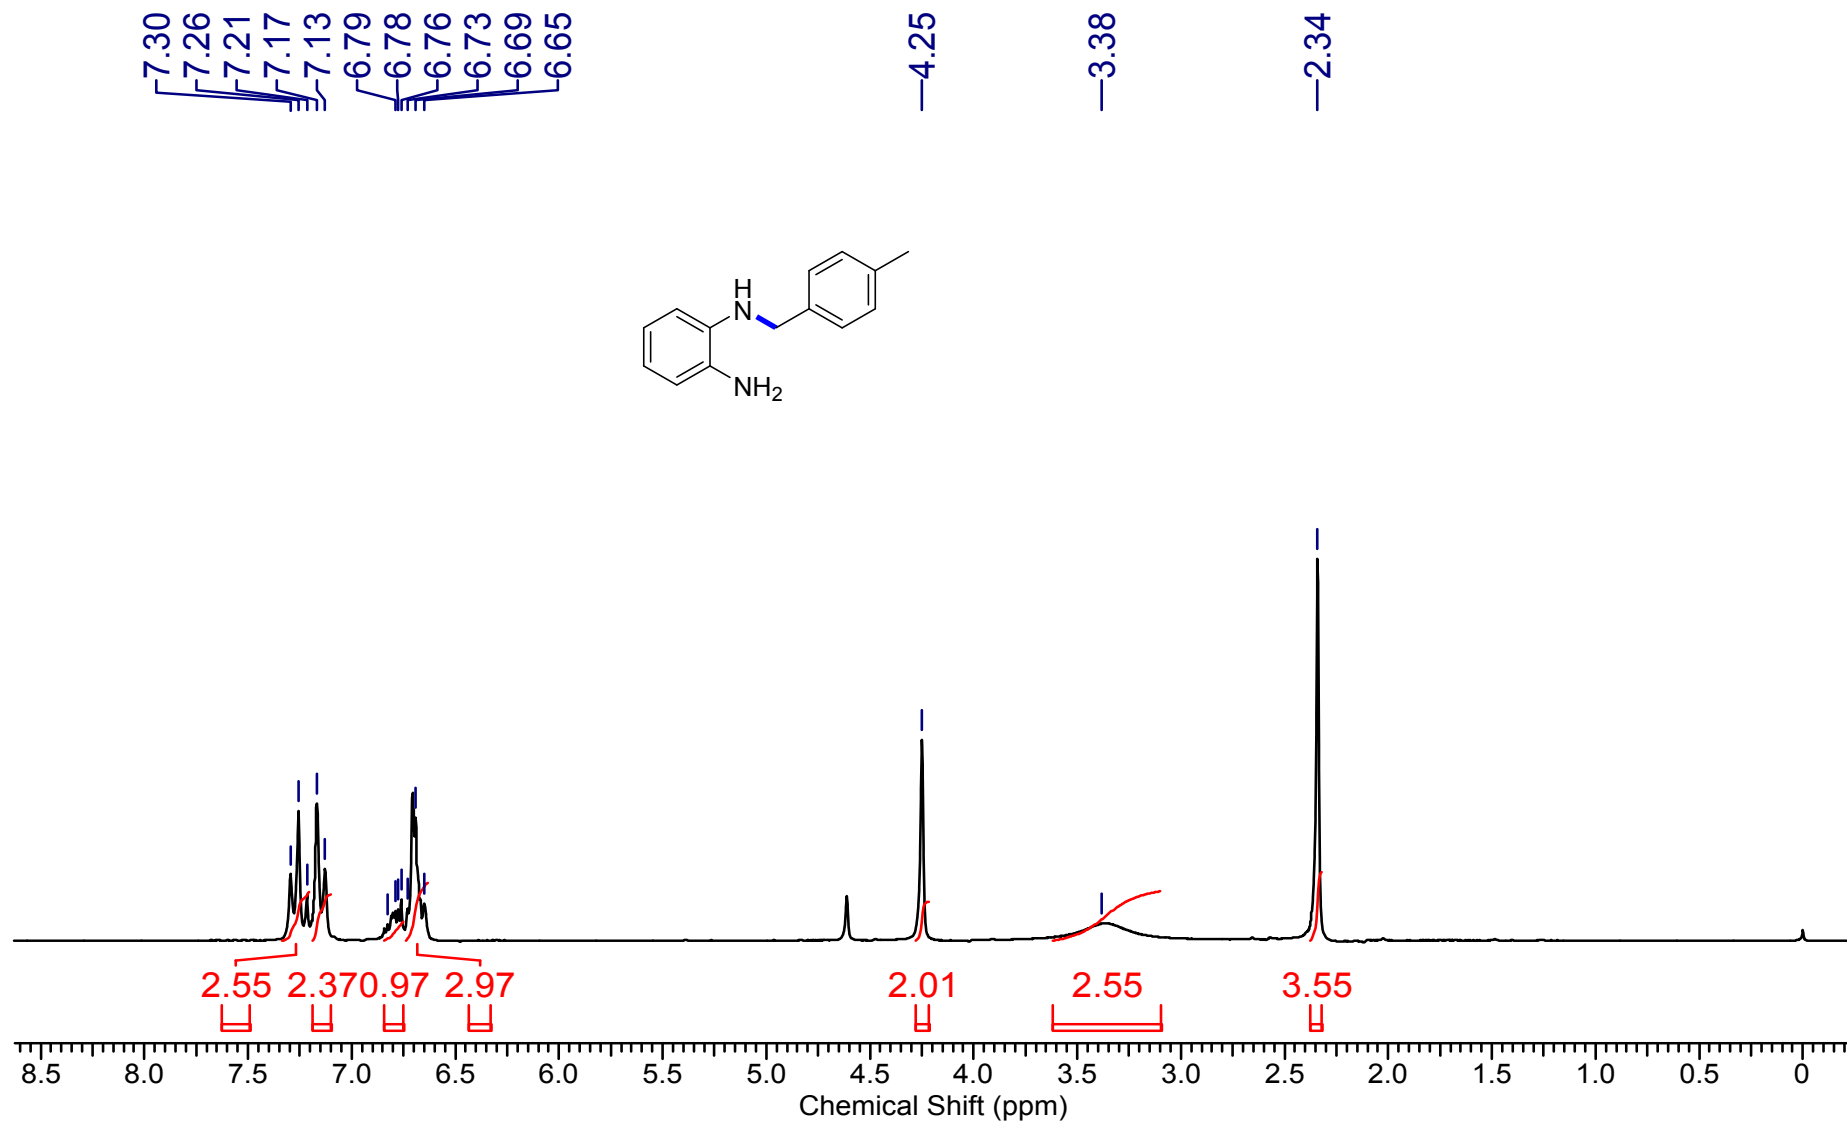

Figure S67.  $^1\text{H}$  of 9d

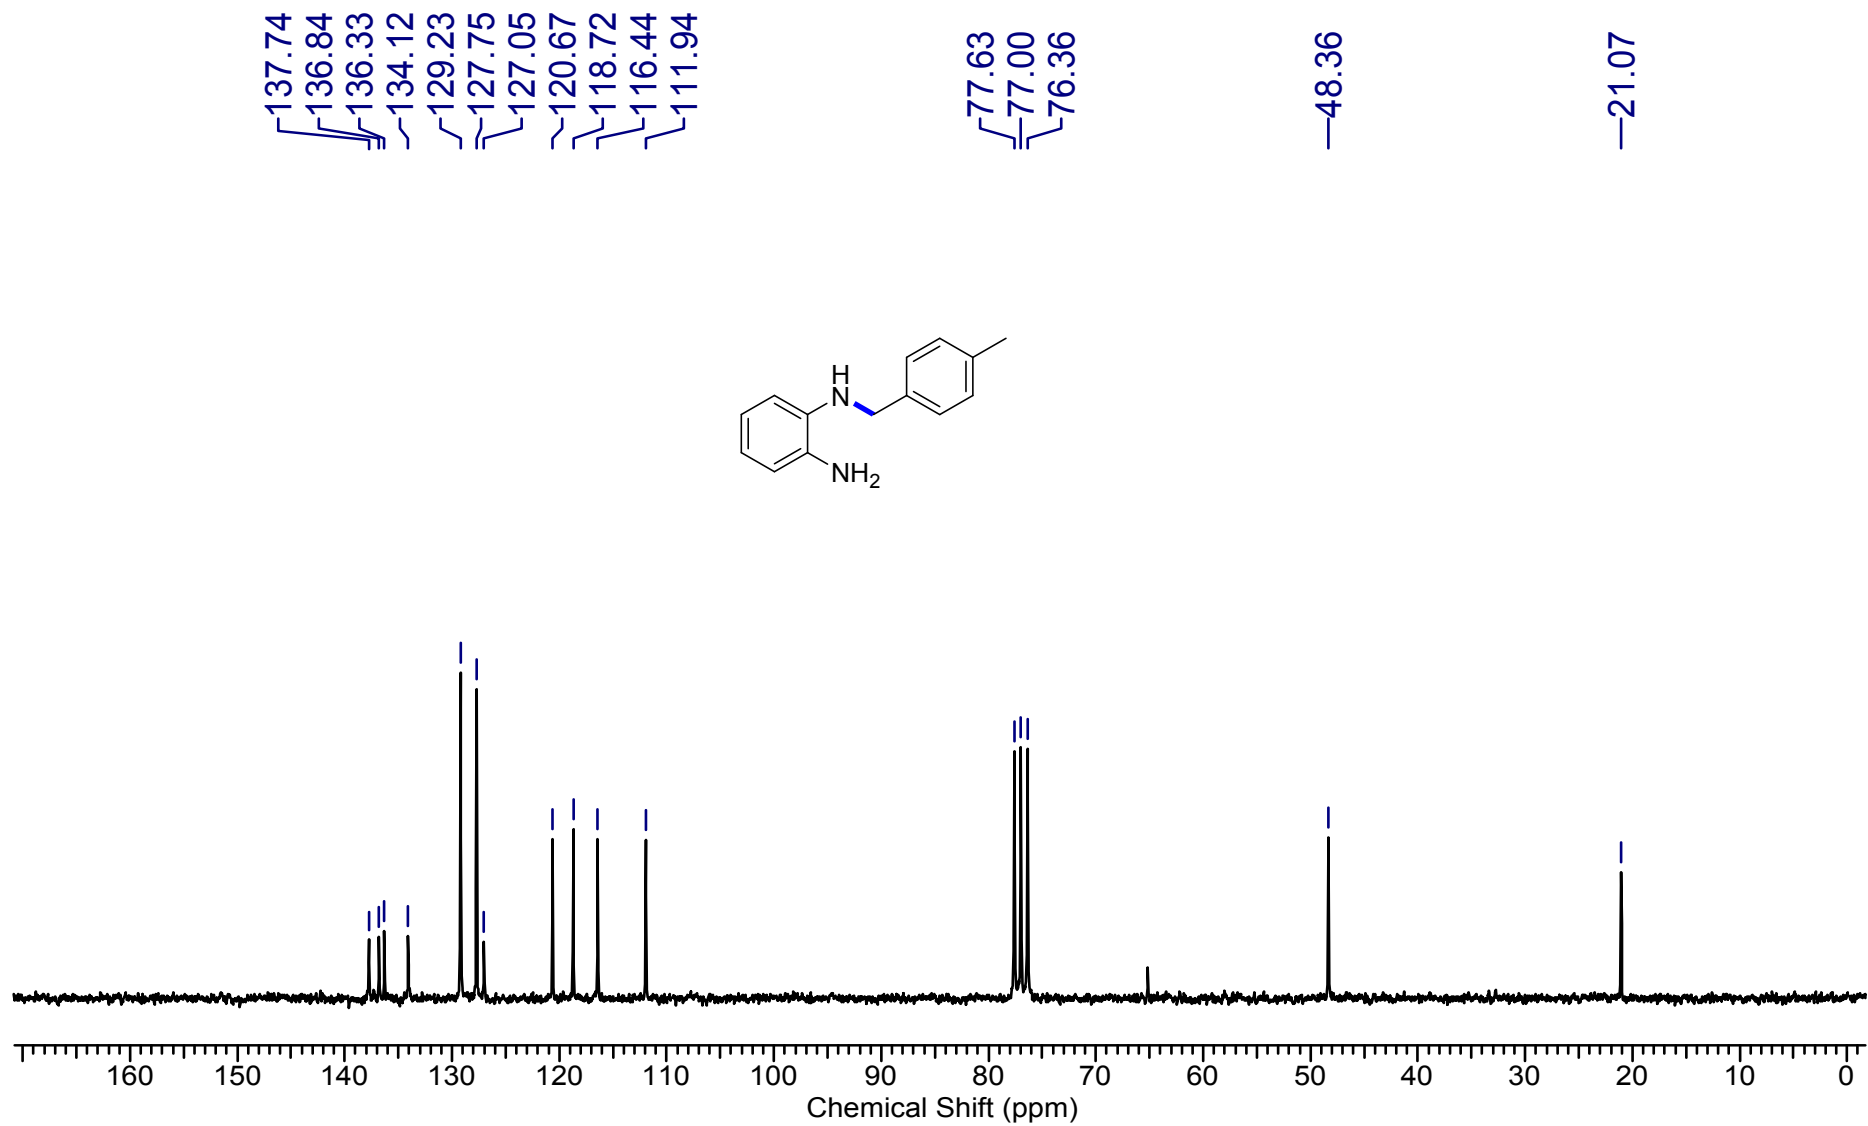

Figure S68.  $^{13}\text{C}$  of **9d**

8.37  
7.78  
7.75  
7.74  
7.41  
7.39  
7.37  
7.33  
7.31  
7.27  
7.22

4.80

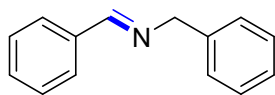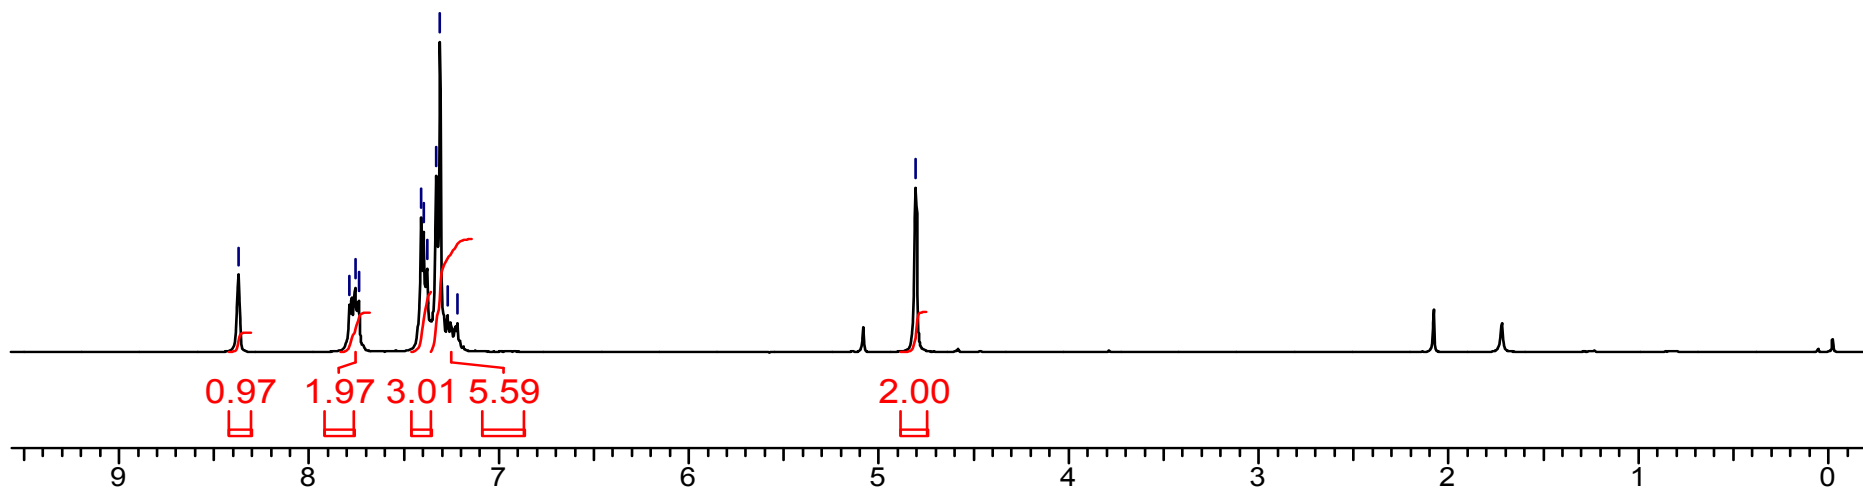

Figure S69. <sup>1</sup>H of 11a

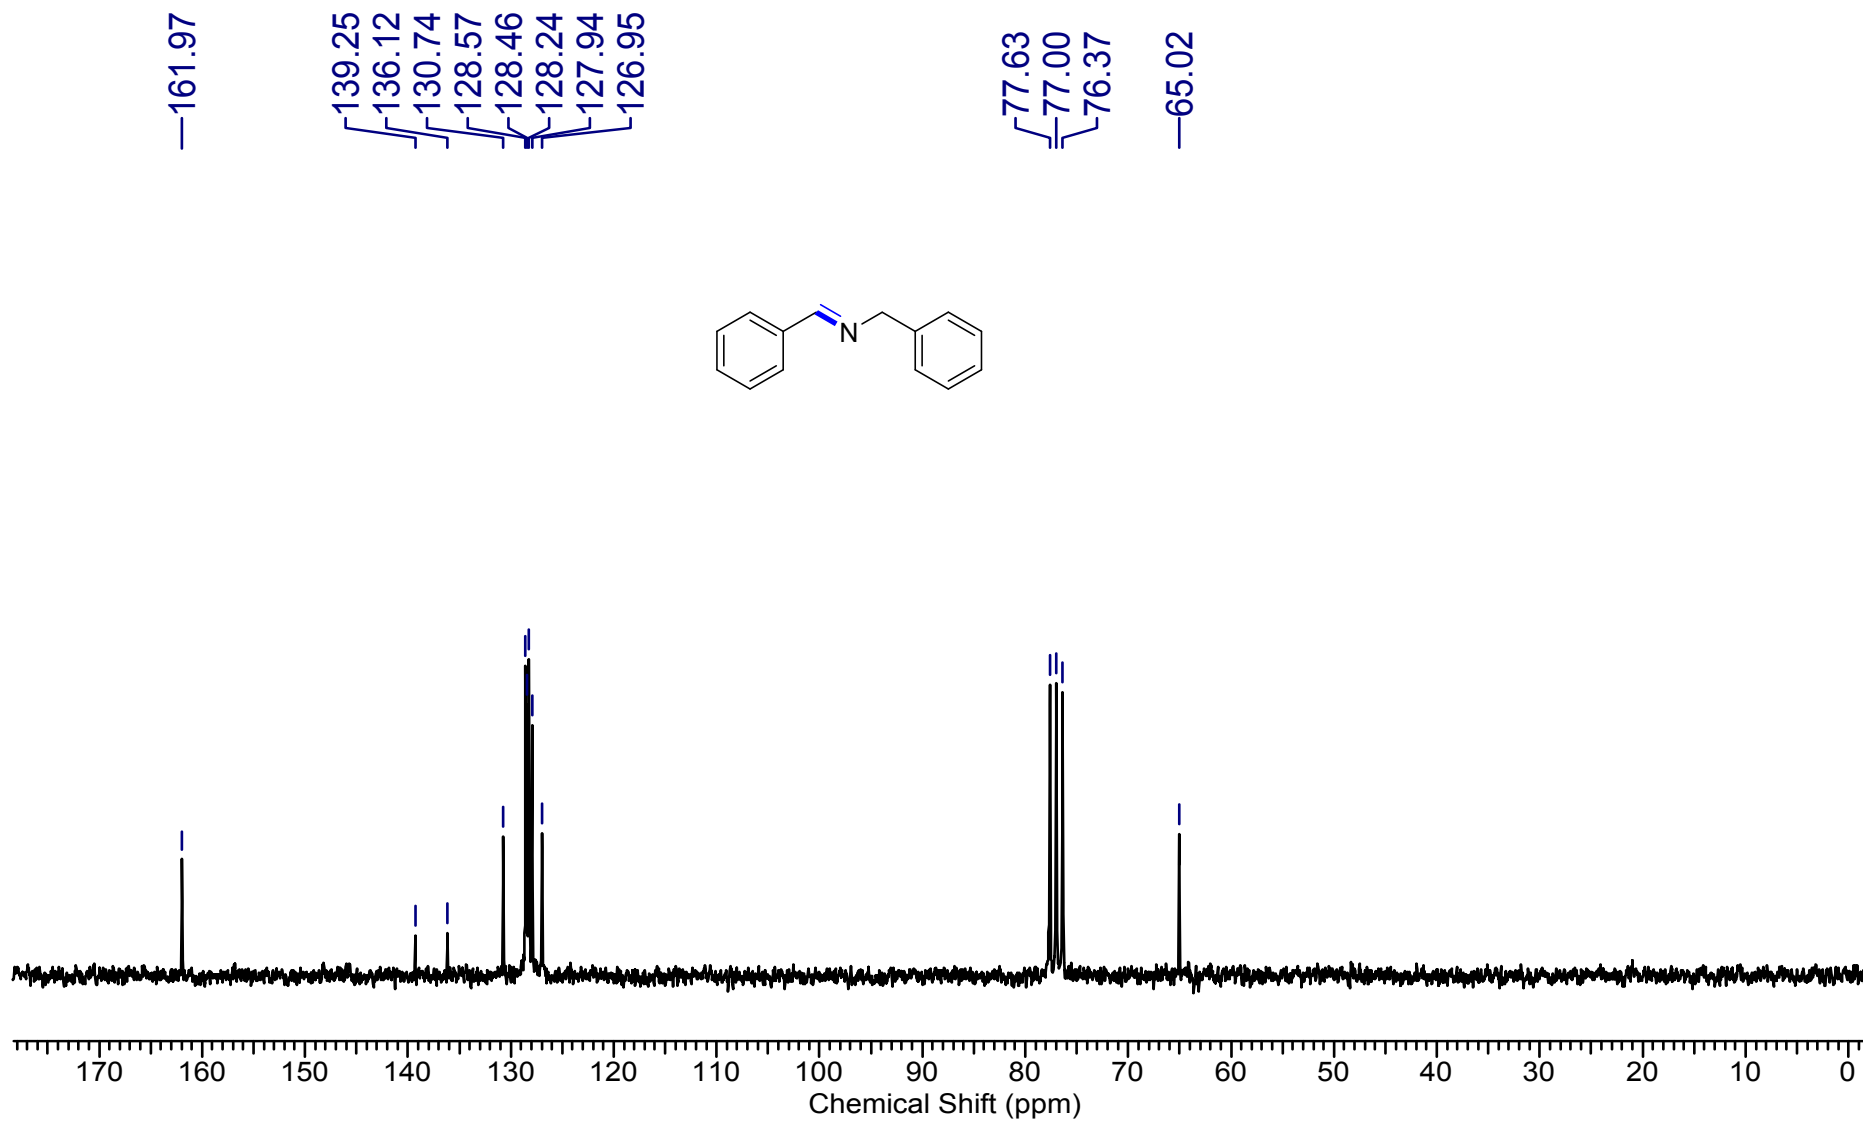

Figure S70.  $^{13}\text{C}$  of 11a



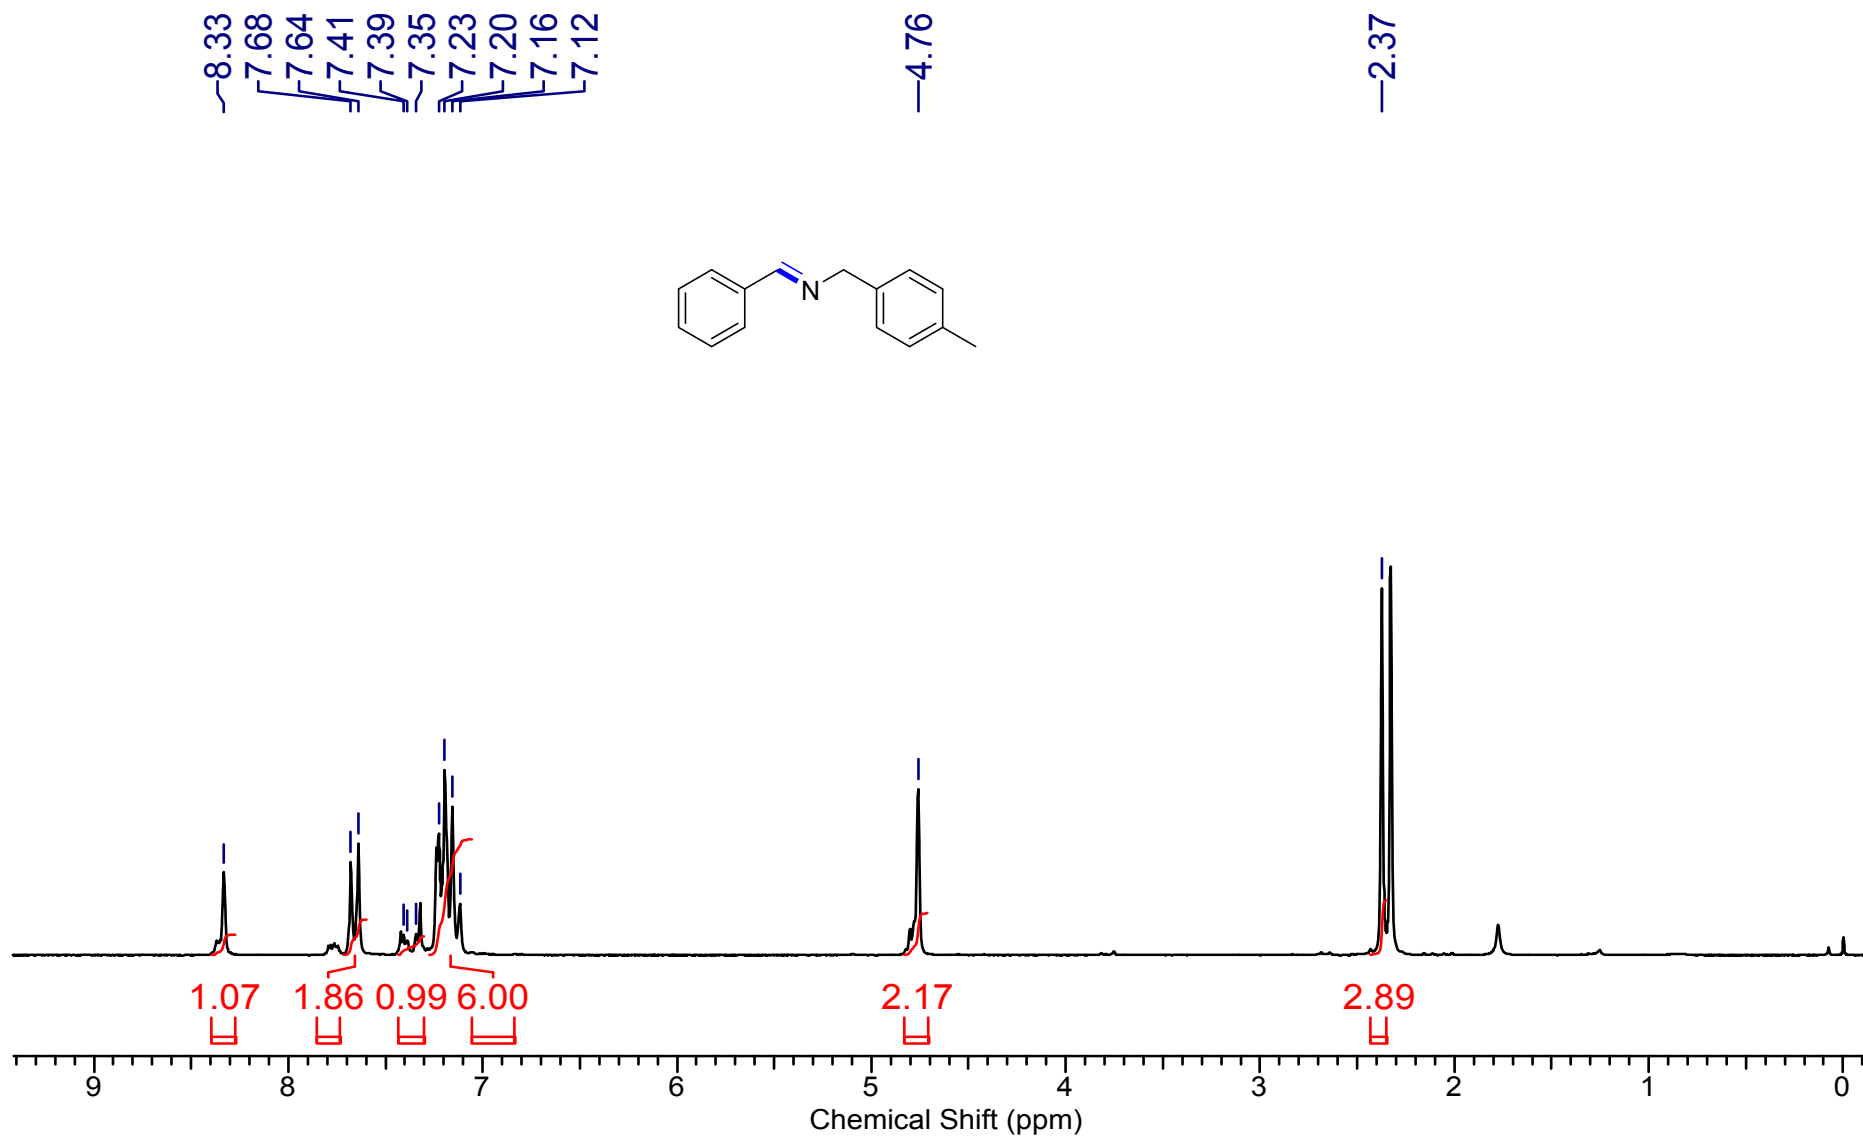

Figure S71. <sup>1</sup>H of 11b

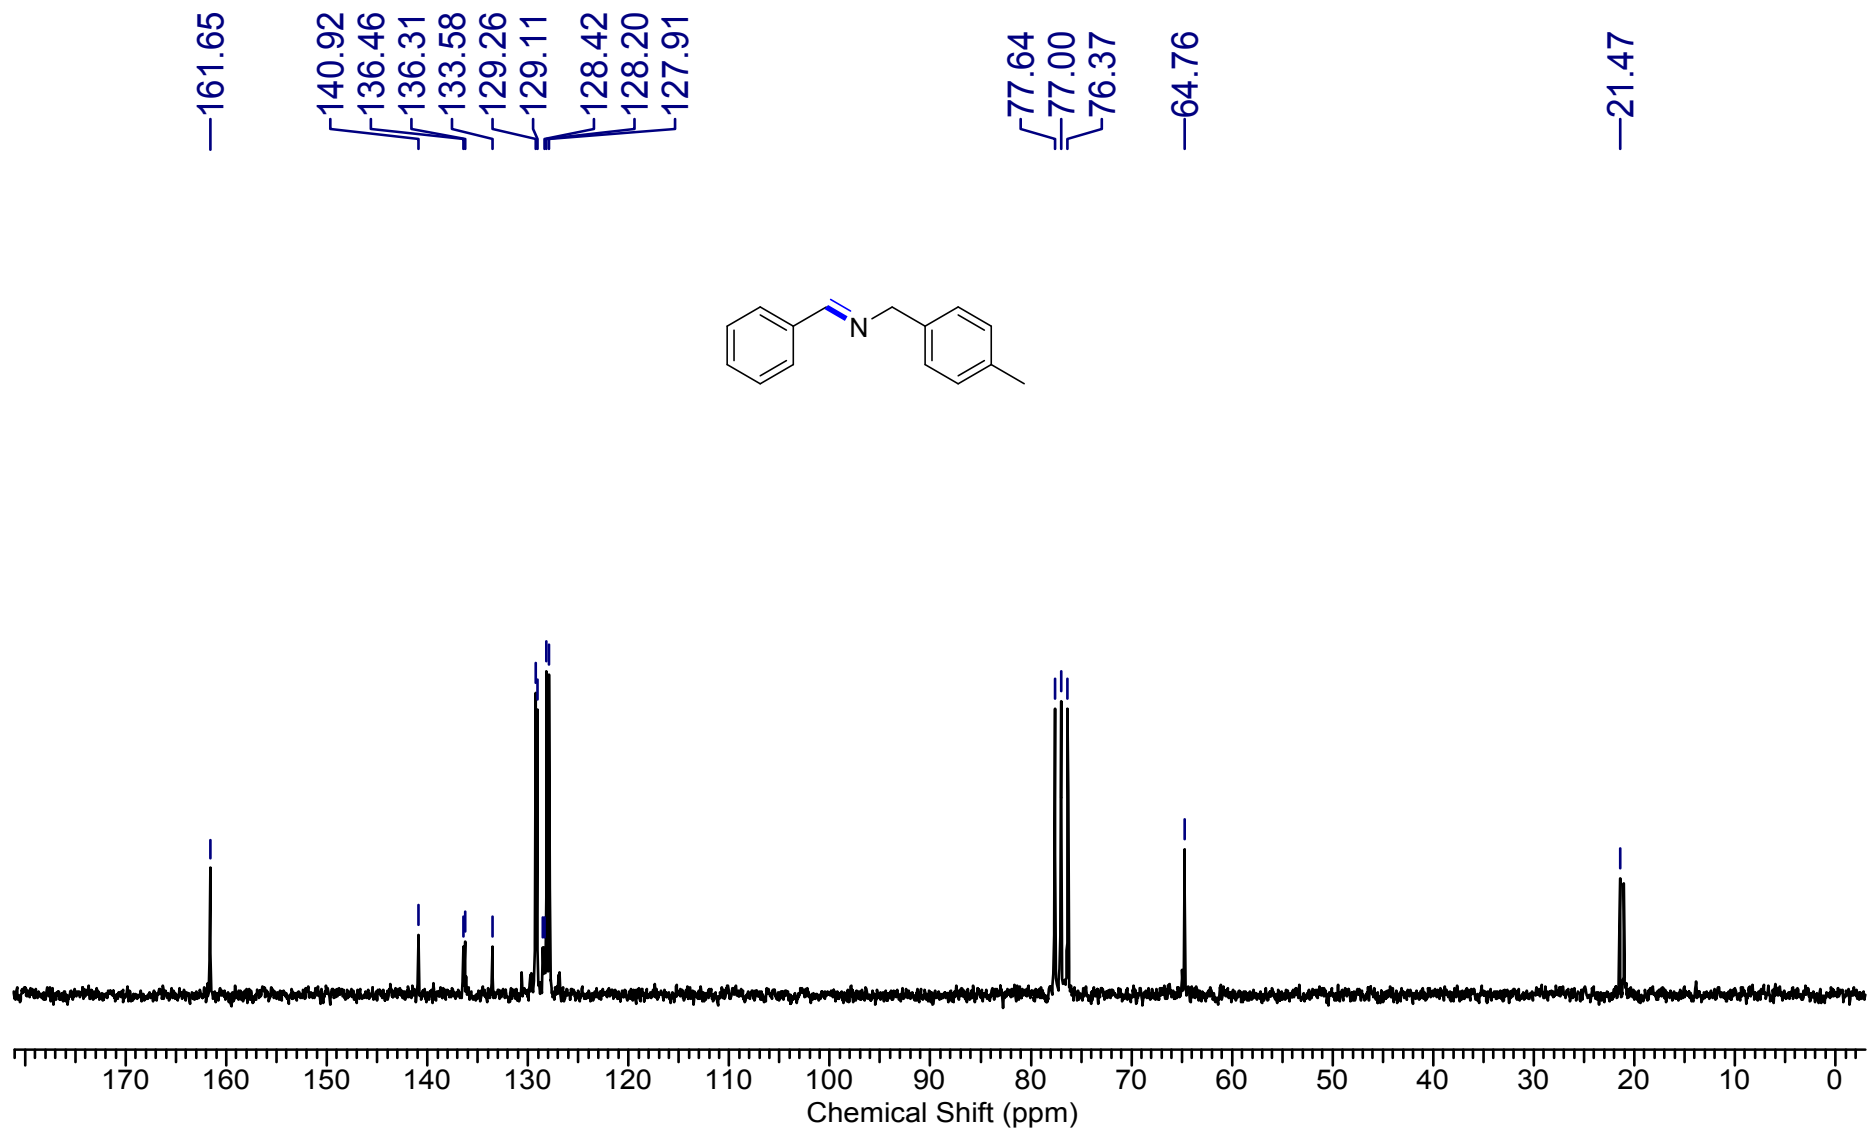

Figure S72.  $^{13}\text{C}$  of 11b

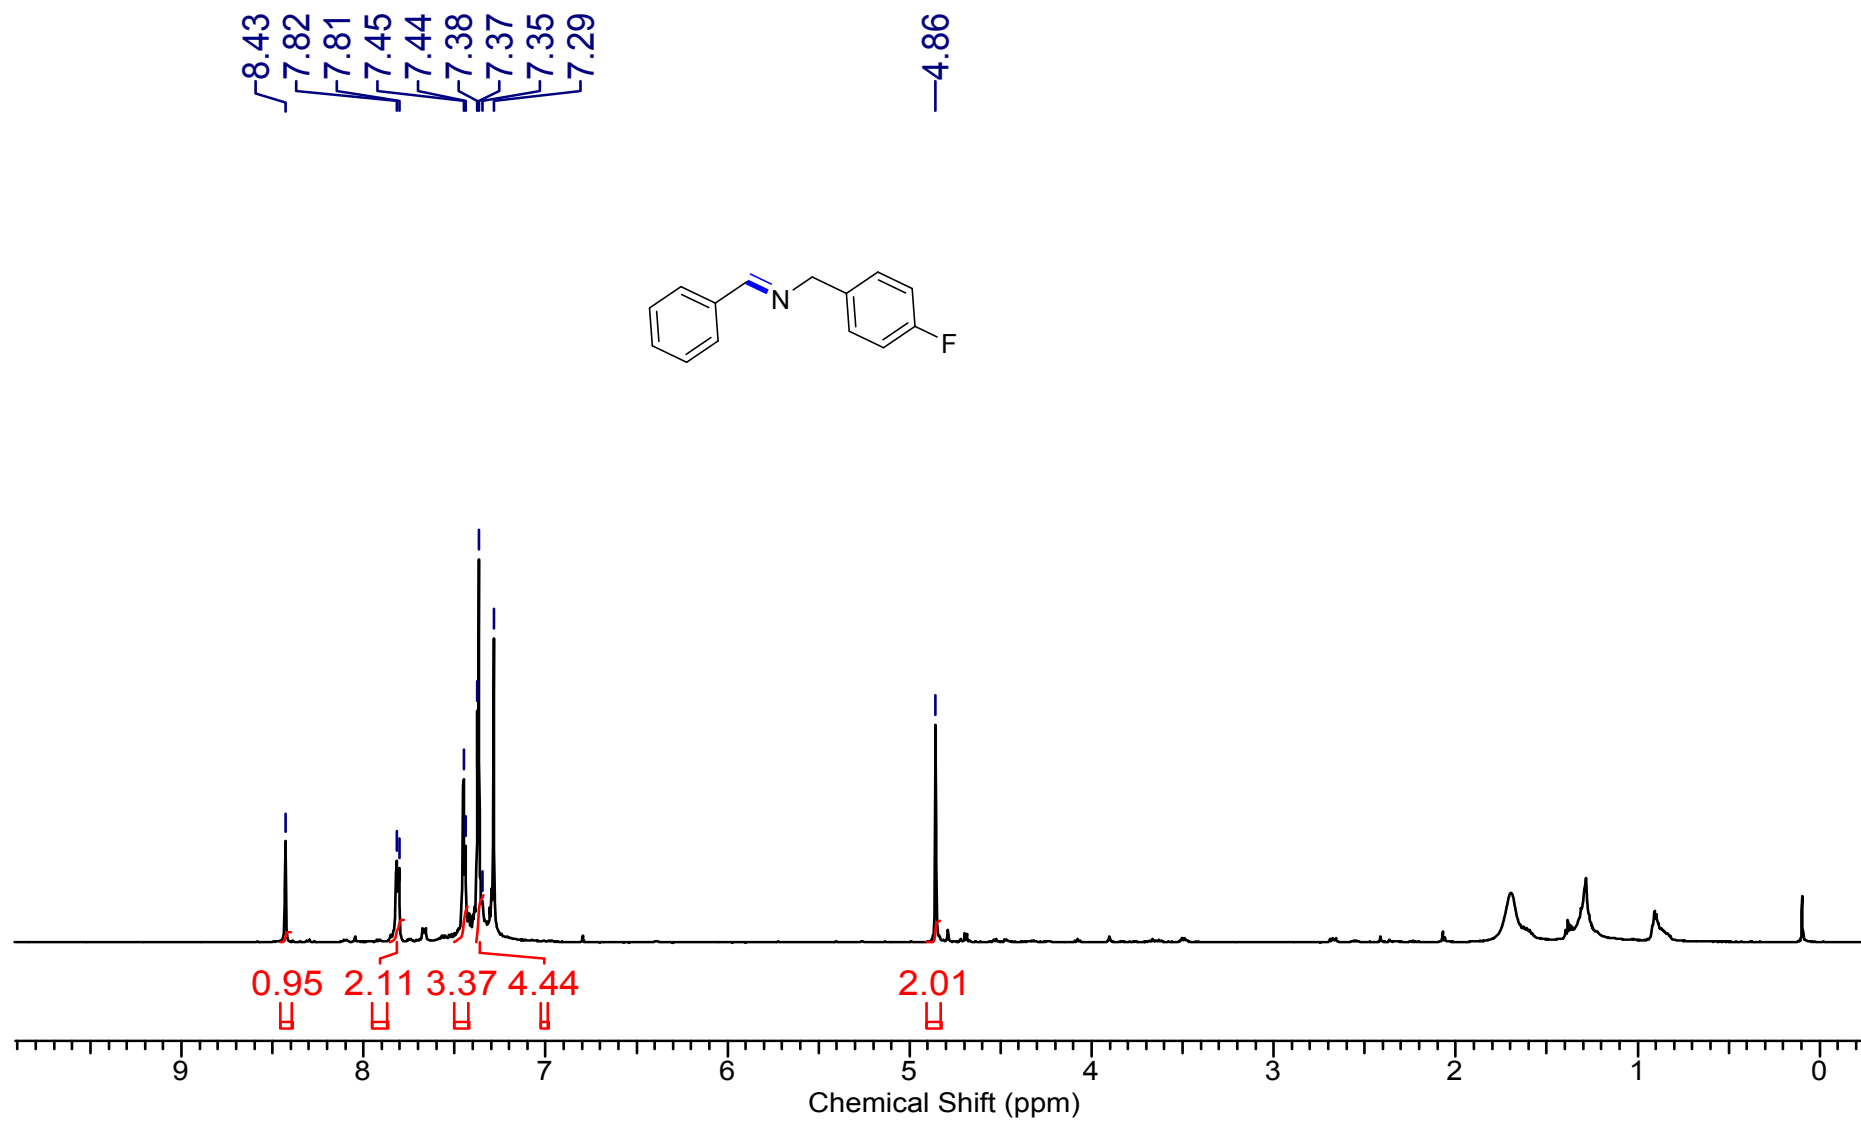

Figure S73.  $^1\text{H}$  of 11c

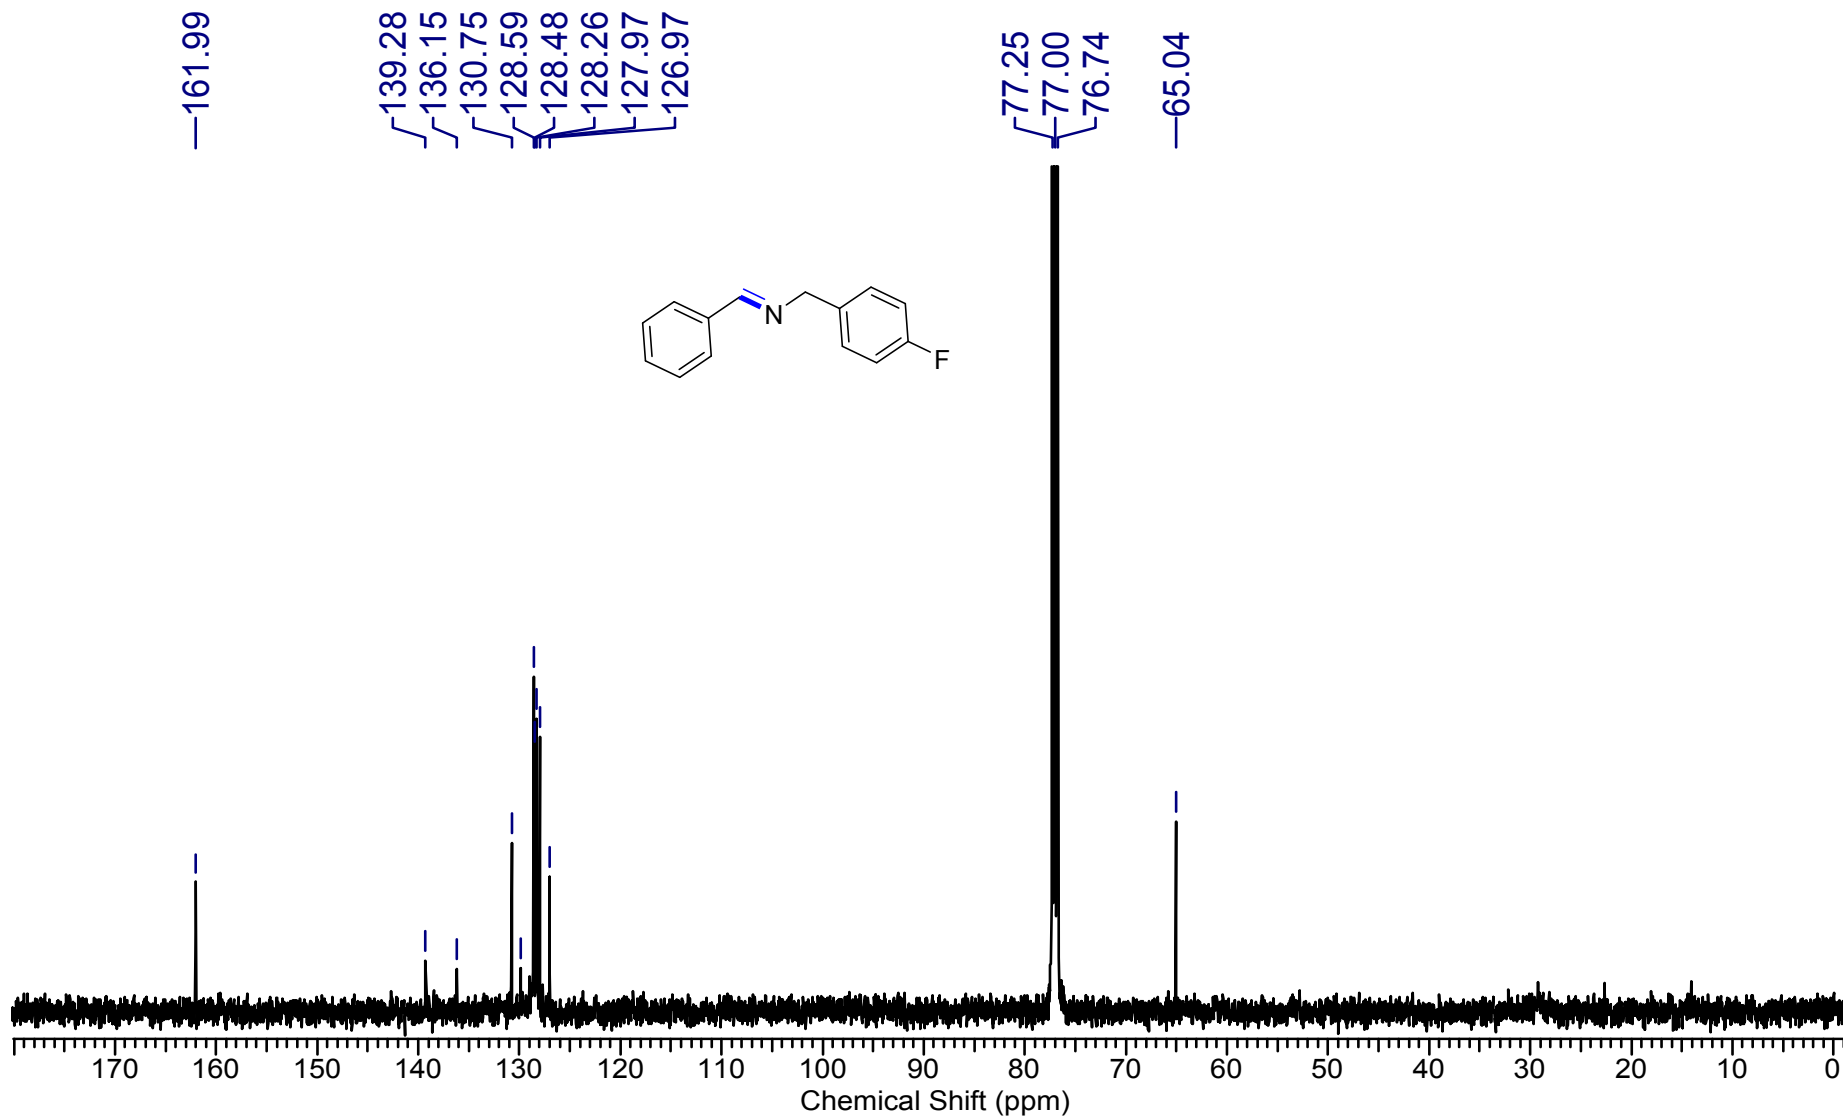

Figure S74.  $^{13}\text{C}$  of **11c**

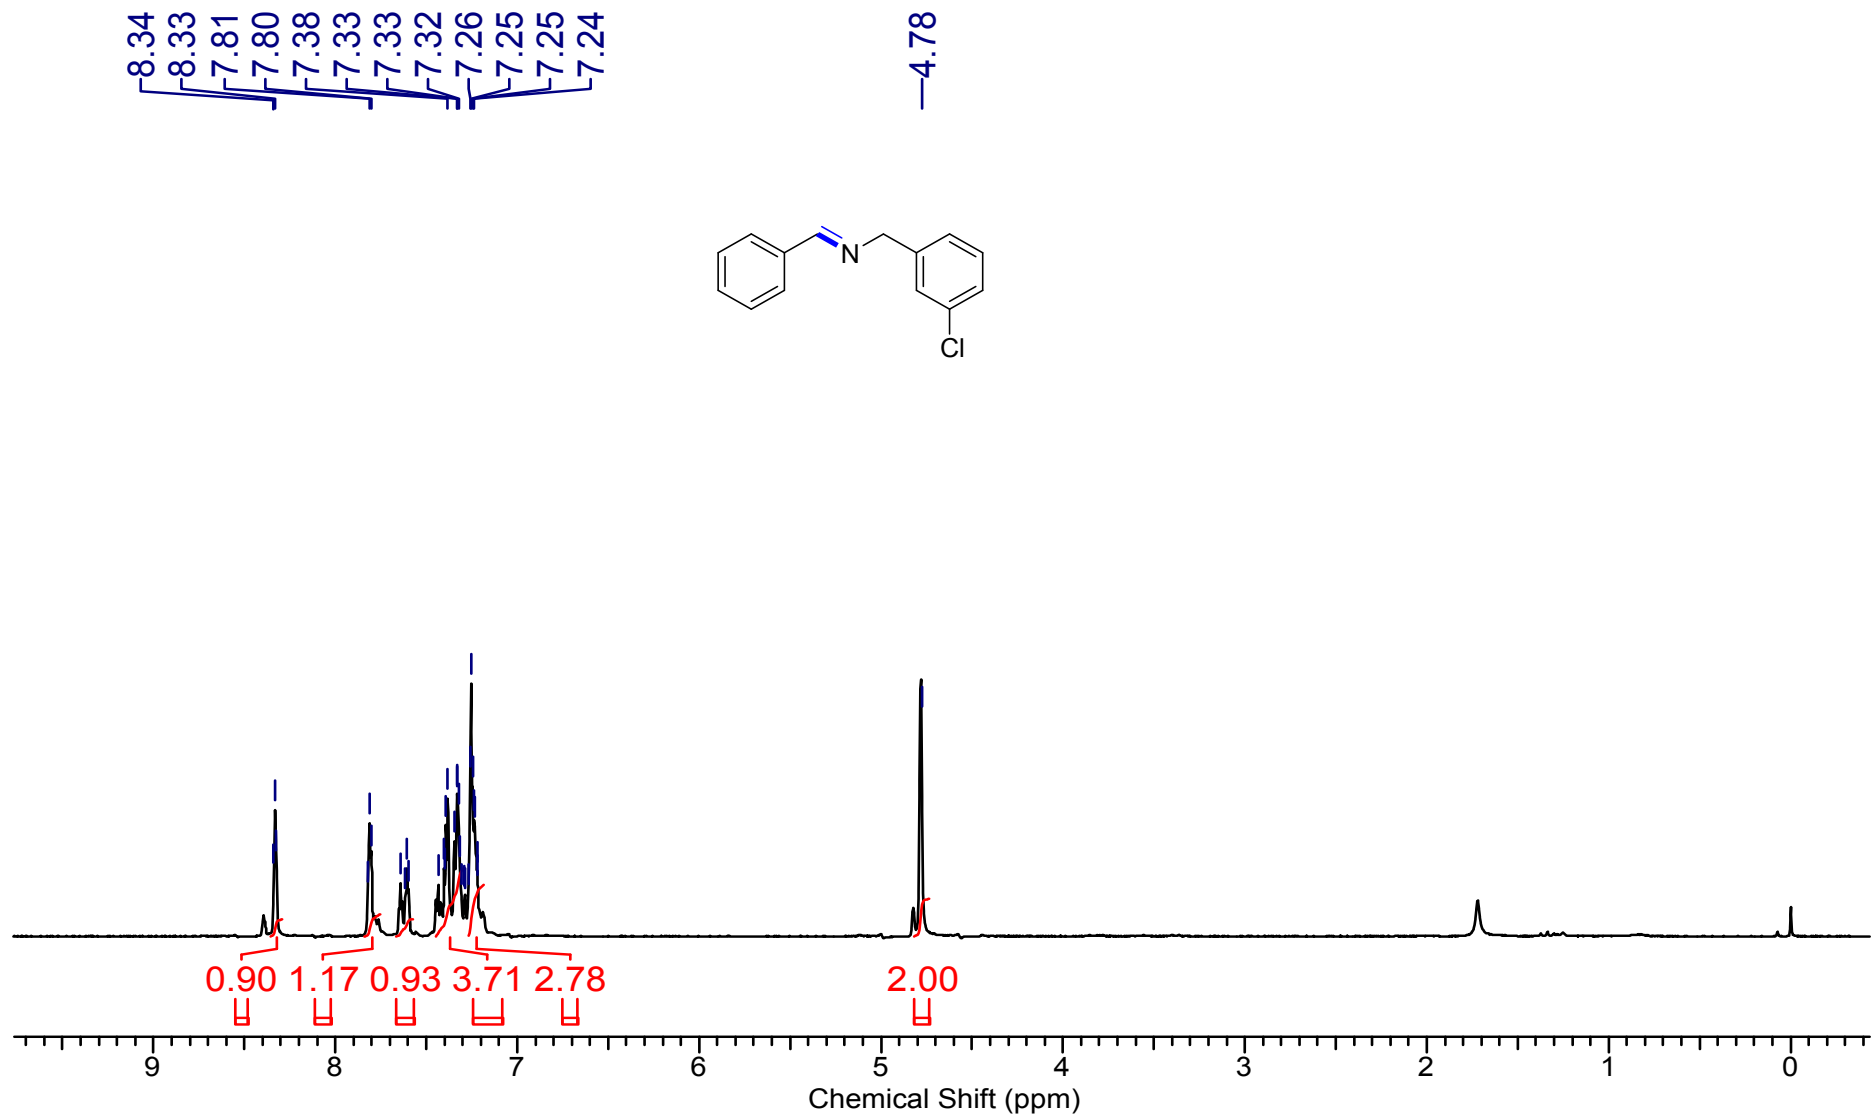

Figure S75. <sup>1</sup>H of 11d

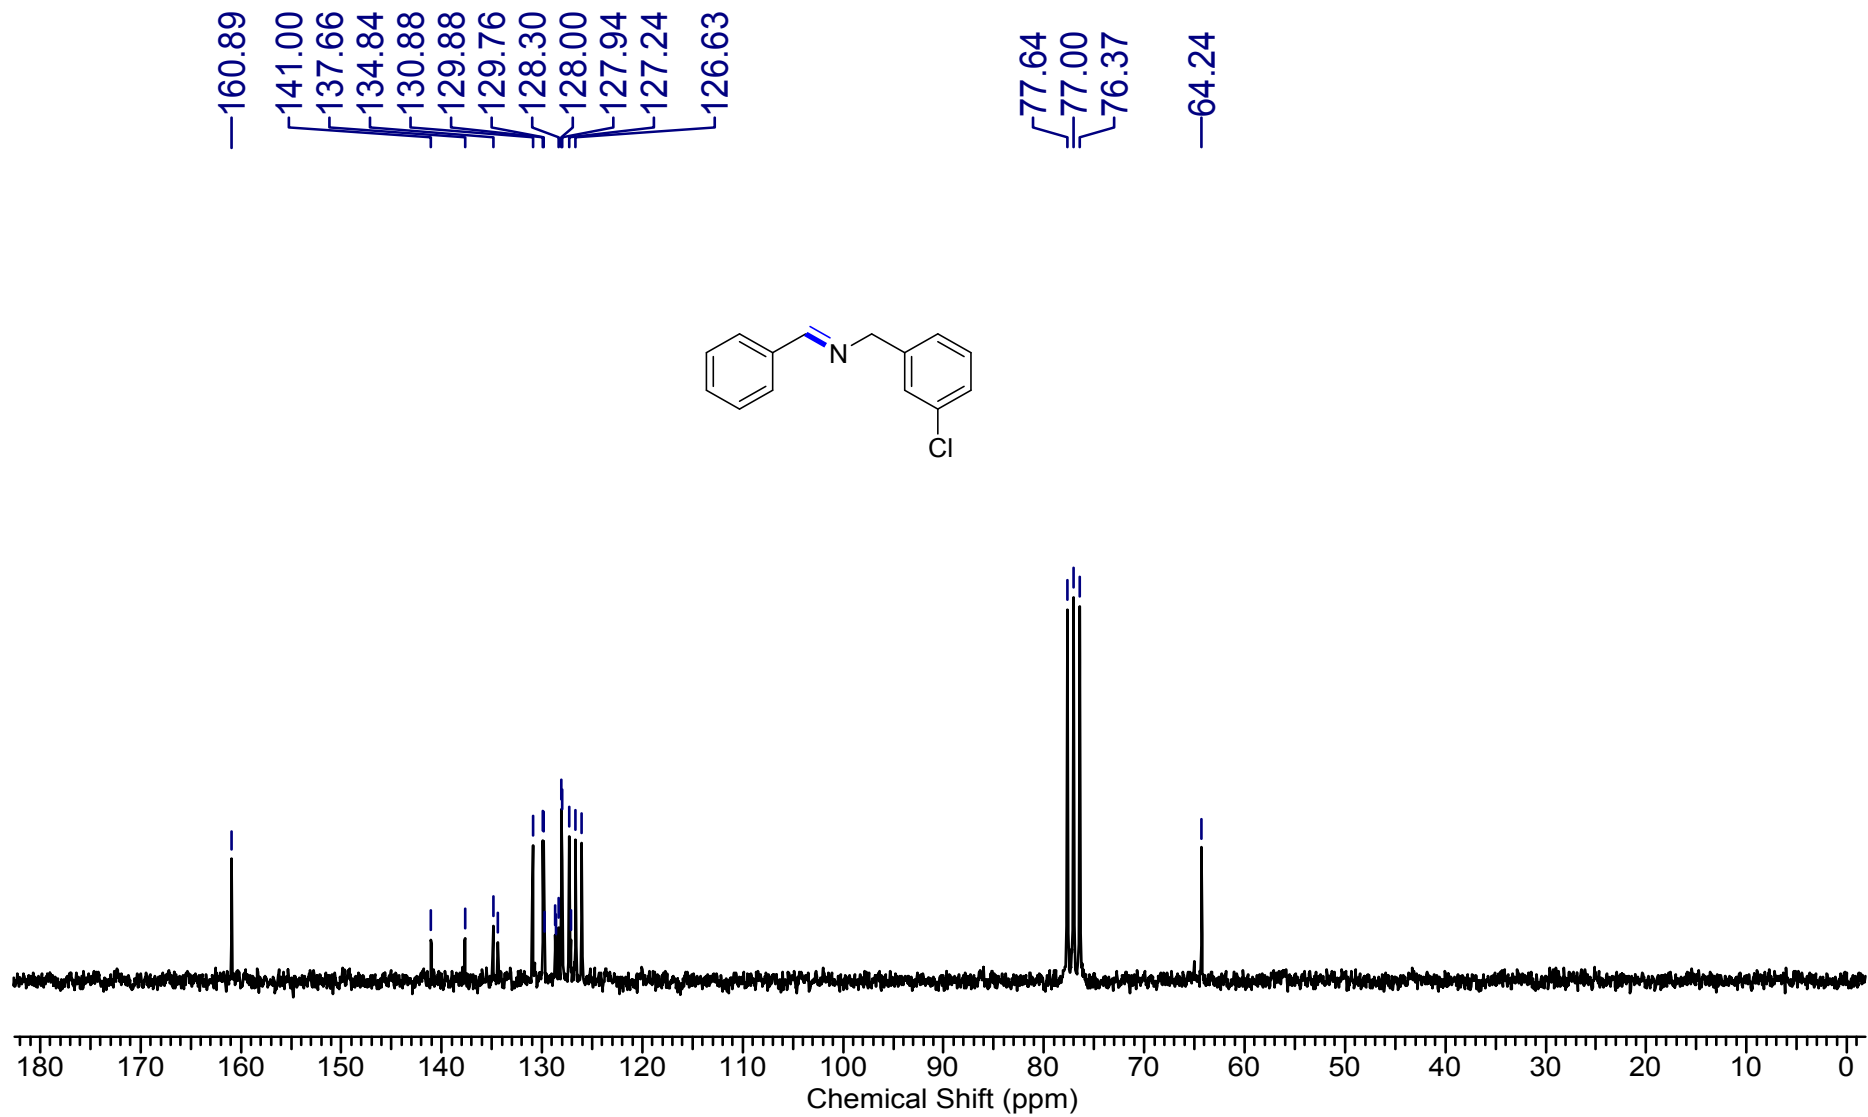

Figure S76. <sup>13</sup>C of 11d

8.77  
8.31  
8.28  
7.71  
7.69  
7.67  
7.57  
7.54  
7.46  
7.42  
7.34  
-5.05

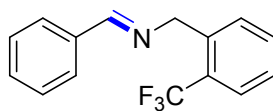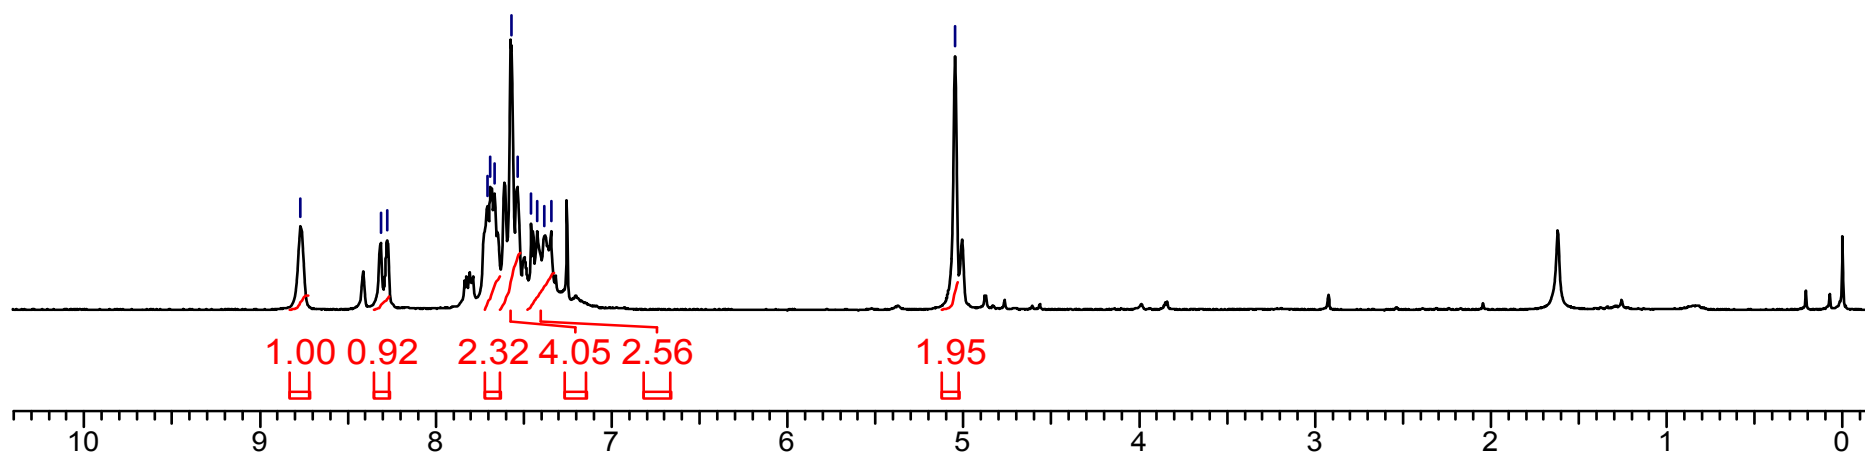

Figure S77. <sup>1</sup>H of 11e

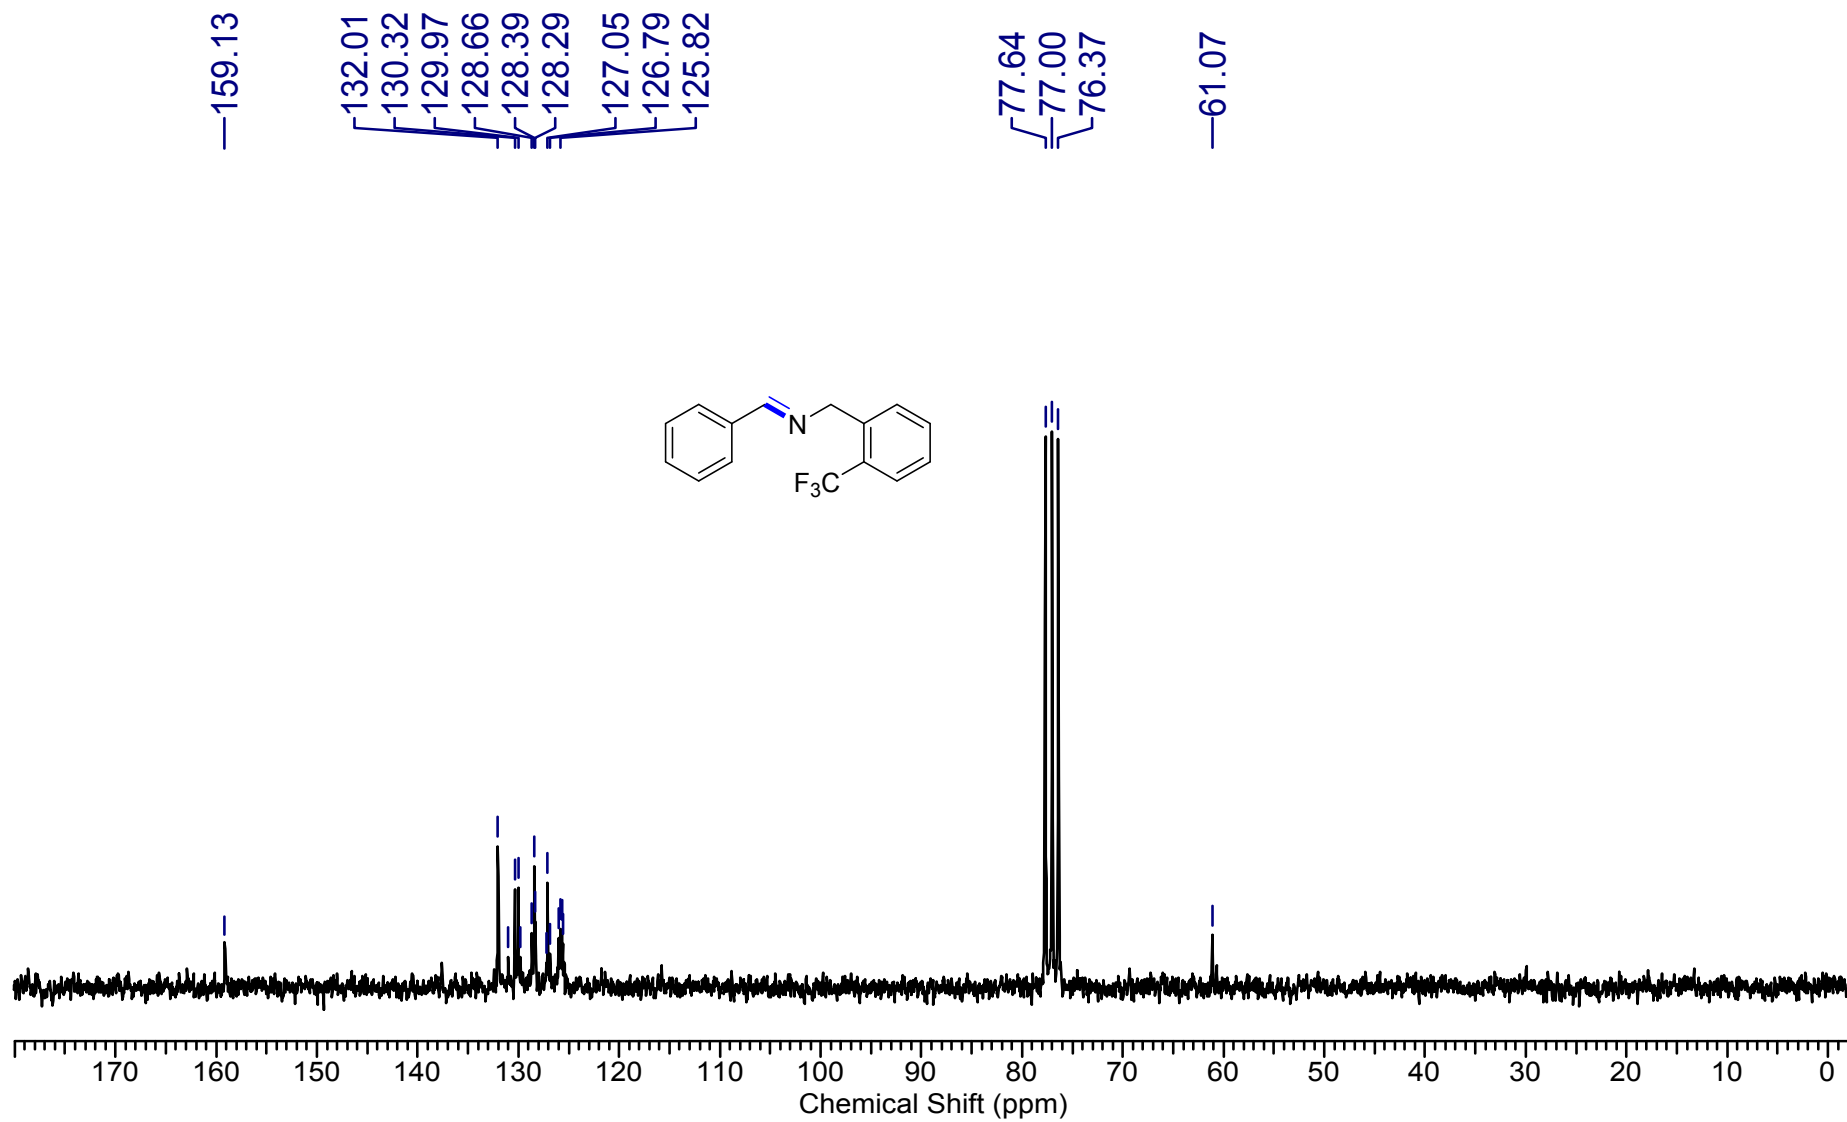

Figure S78.  $^{13}\text{C}$  of 11e



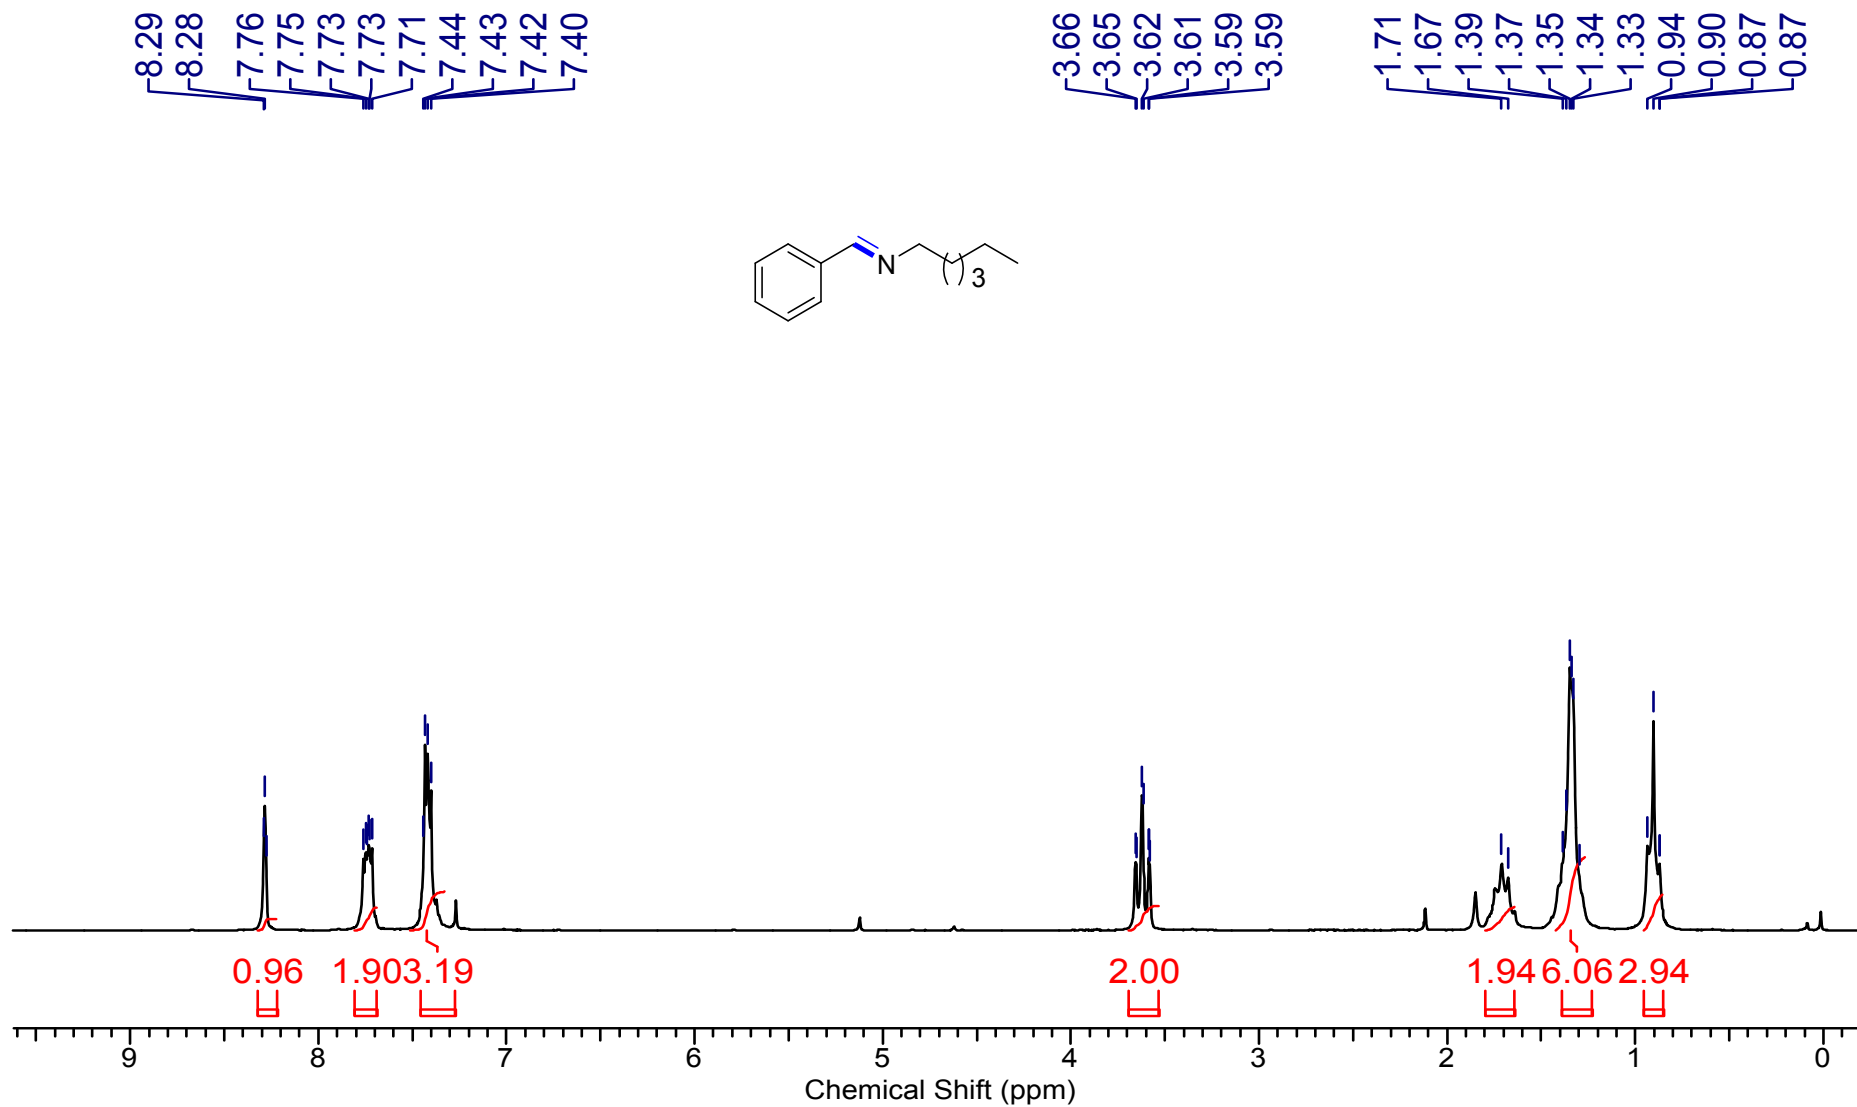

Figure S79. <sup>1</sup>H of 11f

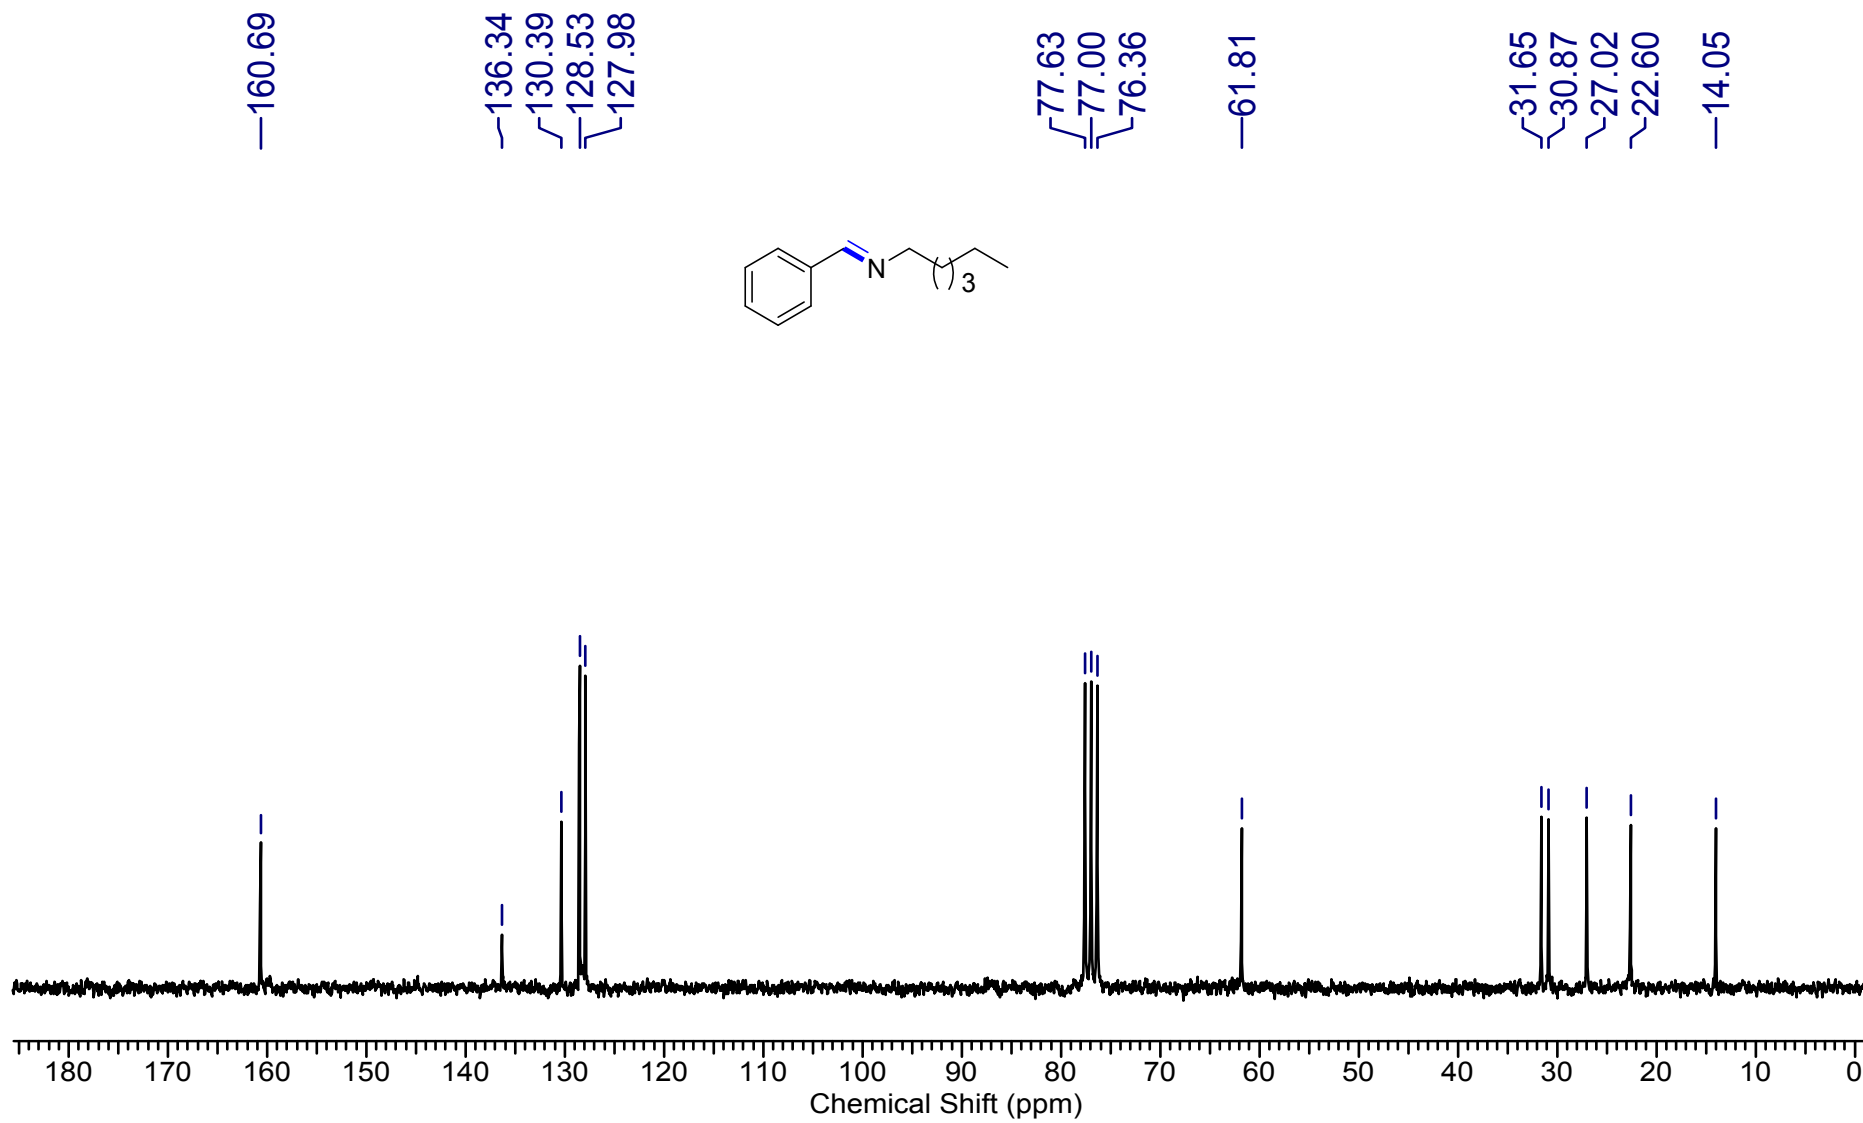

Figure S80. <sup>13</sup>C of 11f

8.41  
8.37  
7.79  
7.75  
7.71  
7.45  
7.44  
7.42  
7.38  
7.35  
7.34  
7.27

4.84

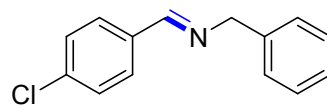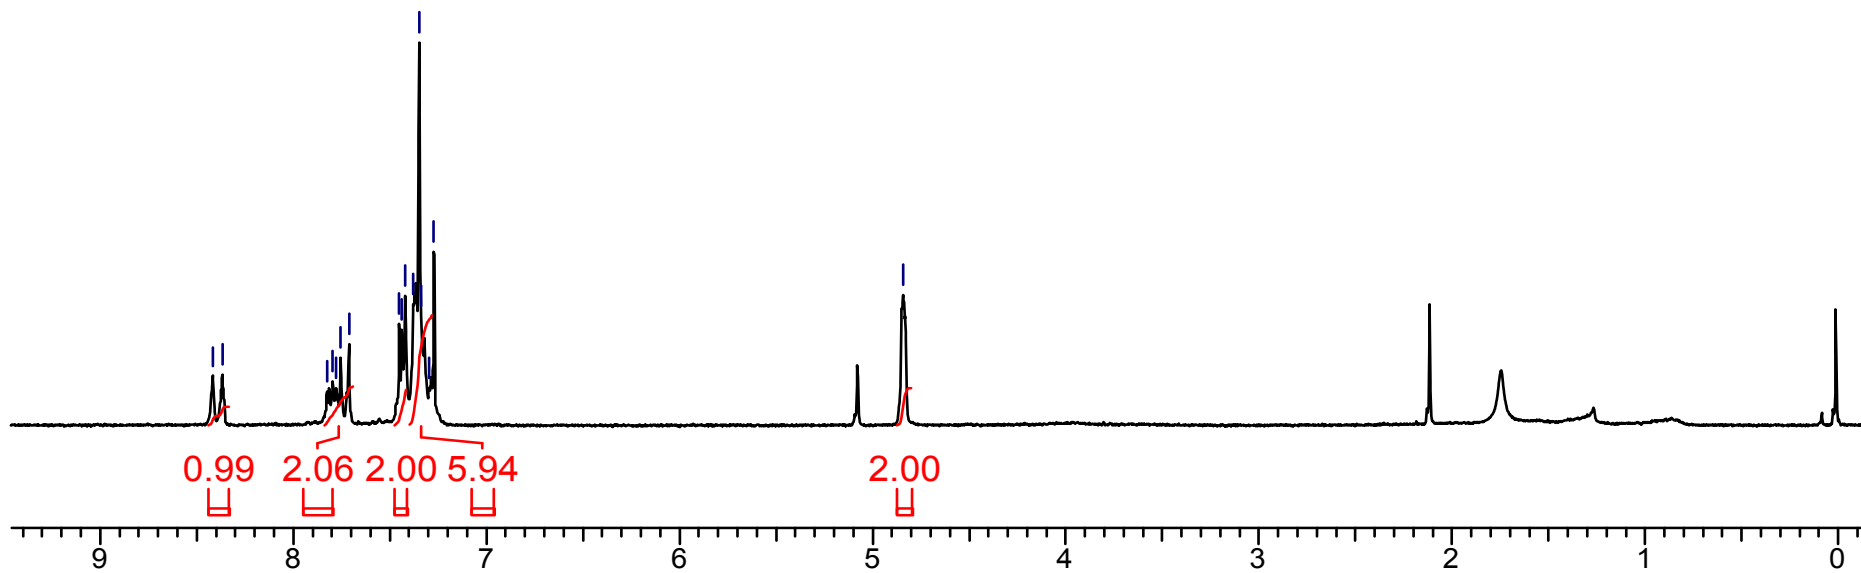

Chemical Shift (ppm)  
Figure S81. <sup>1</sup>H of 11g

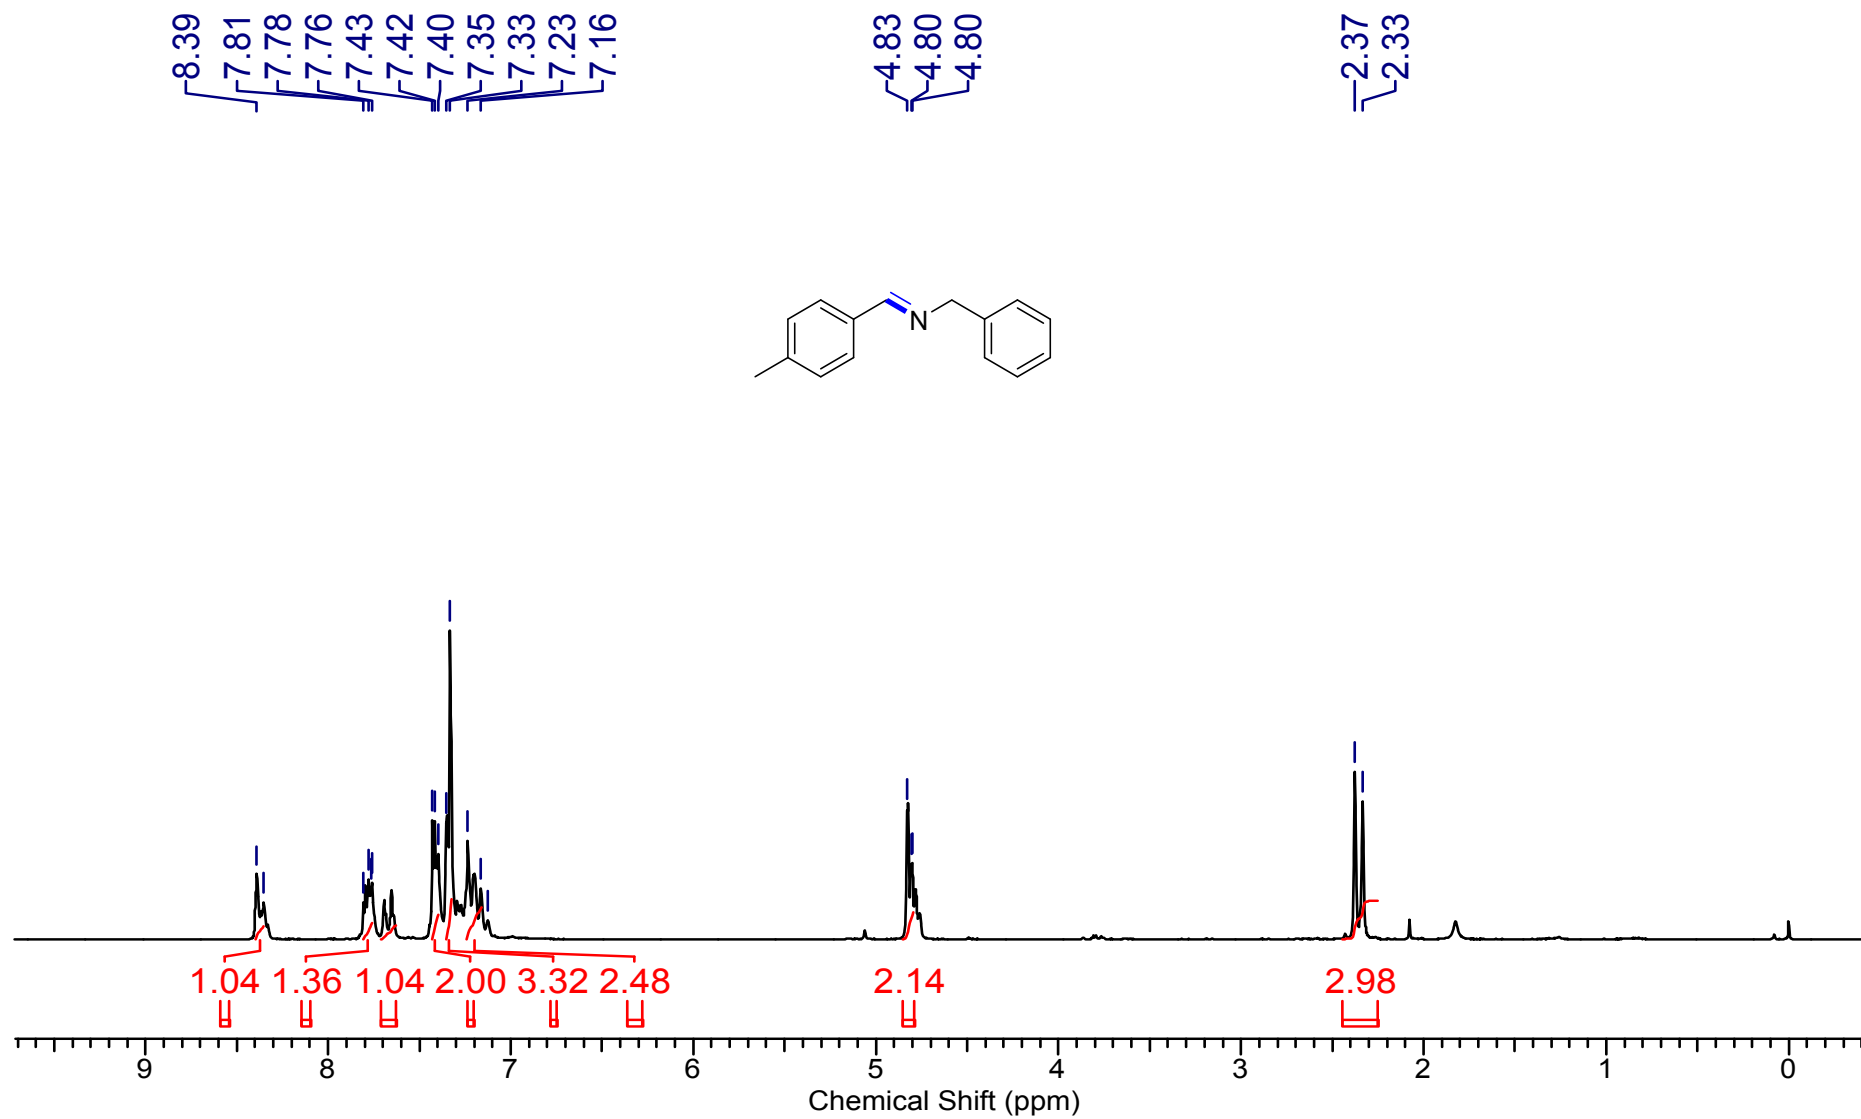

Figure S82. <sup>1</sup>H of 11h (mixture of cis and trans imine product)

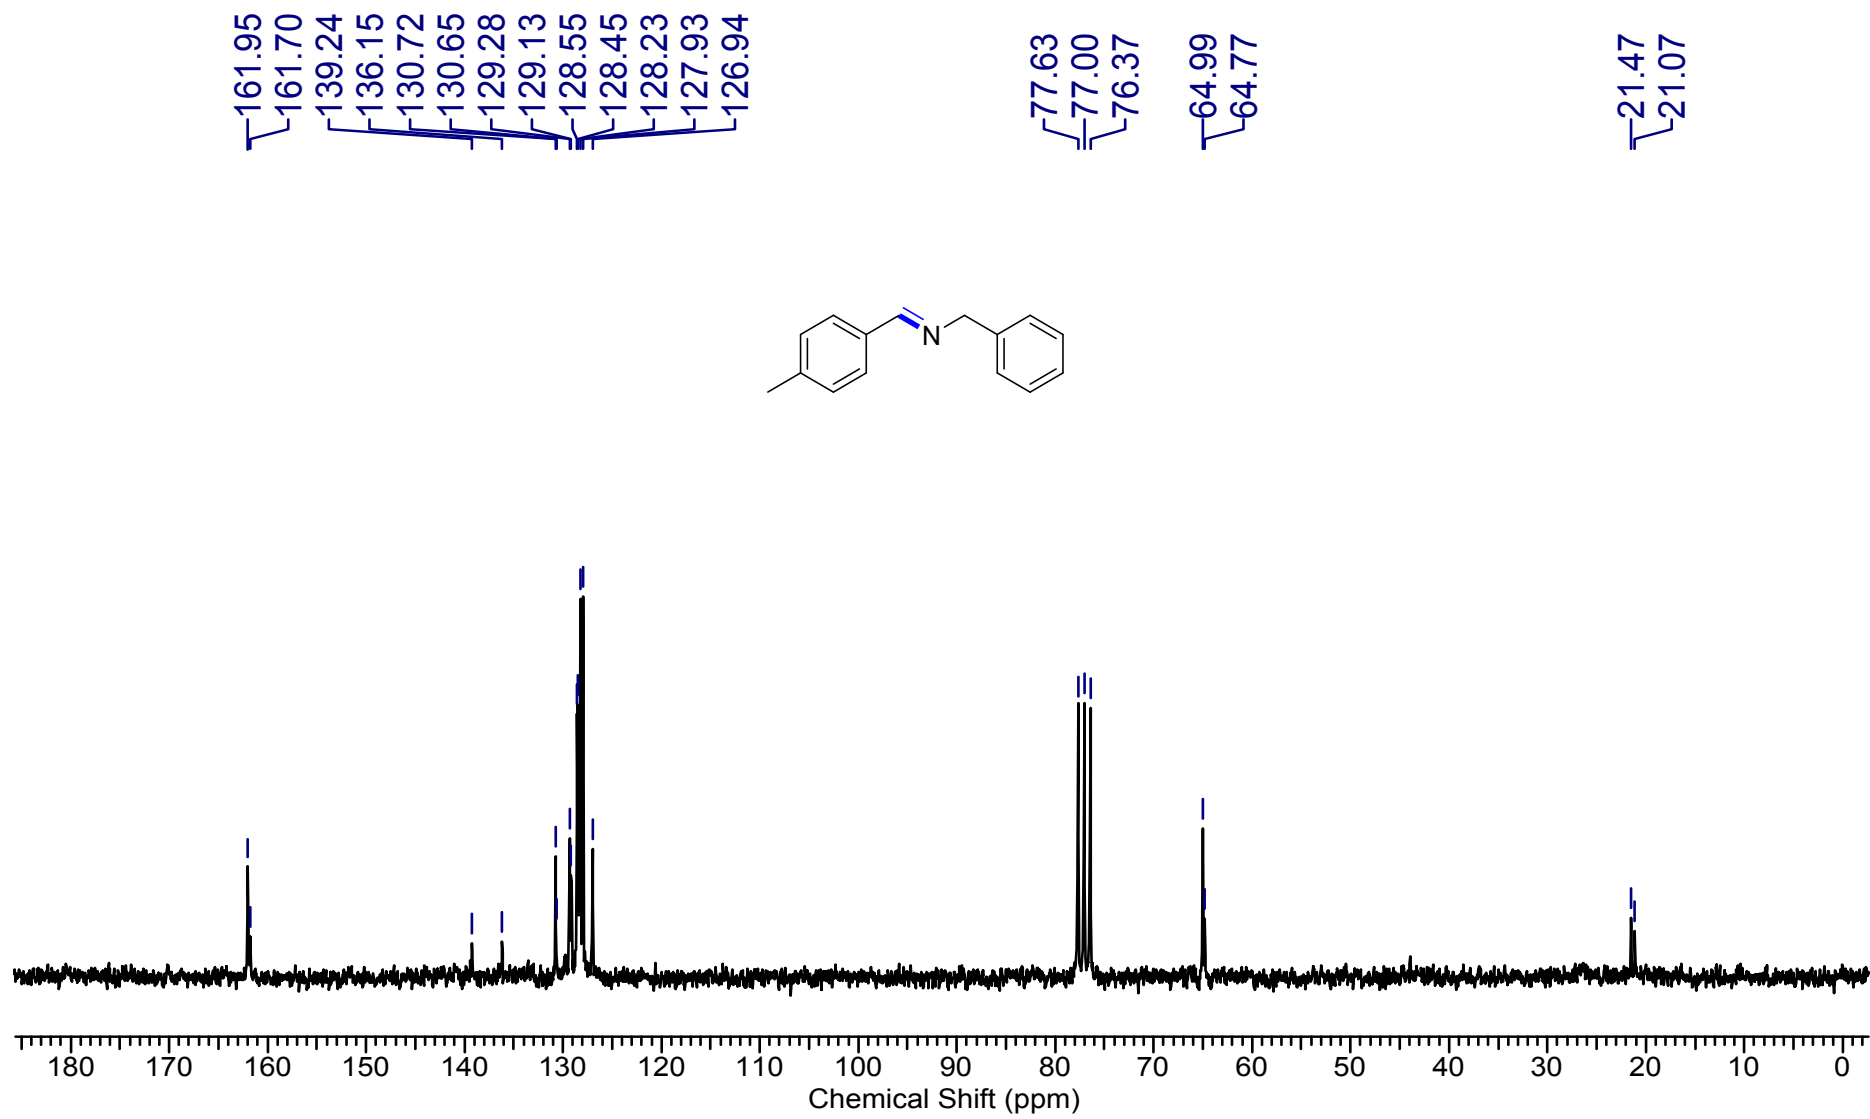

Figure S83.  $^{13}\text{C}$  of 11h (mixture of cis and trans imine product)

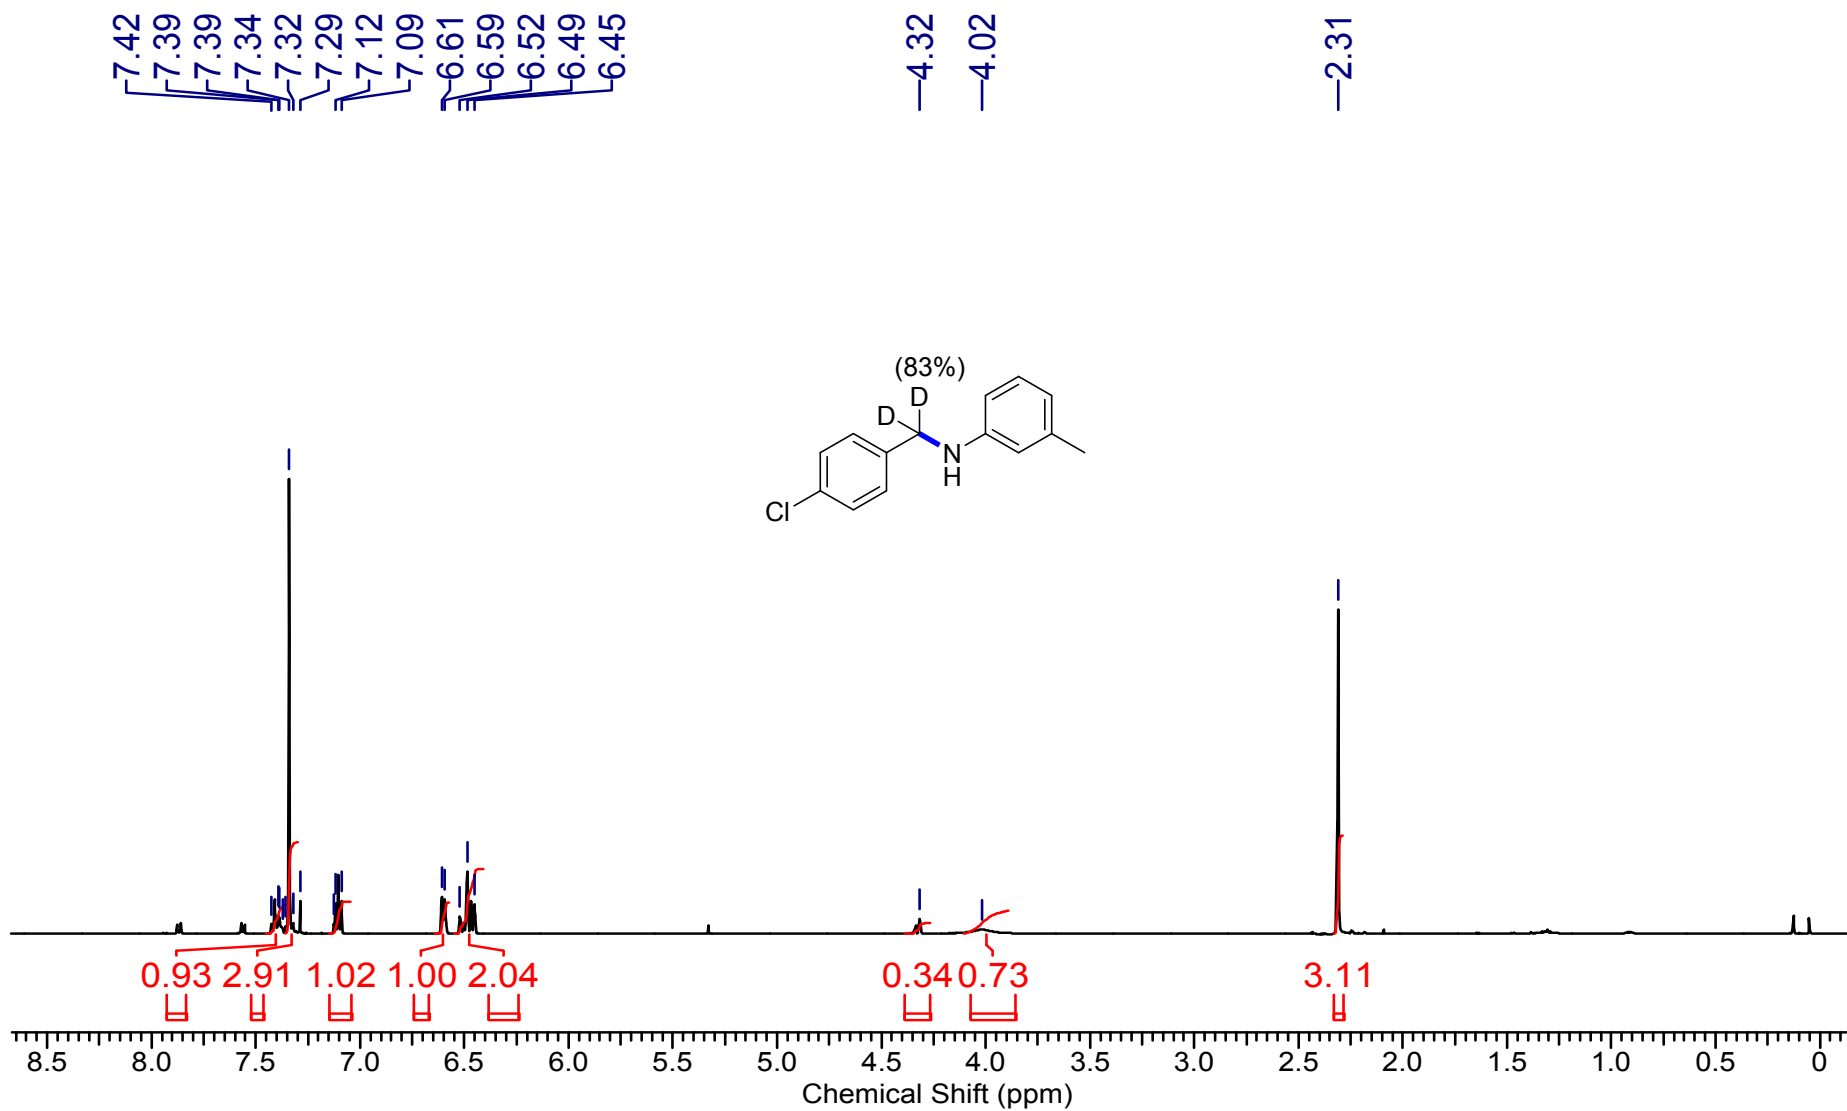

Figure S84.  $^1\text{H}$  of D-5c

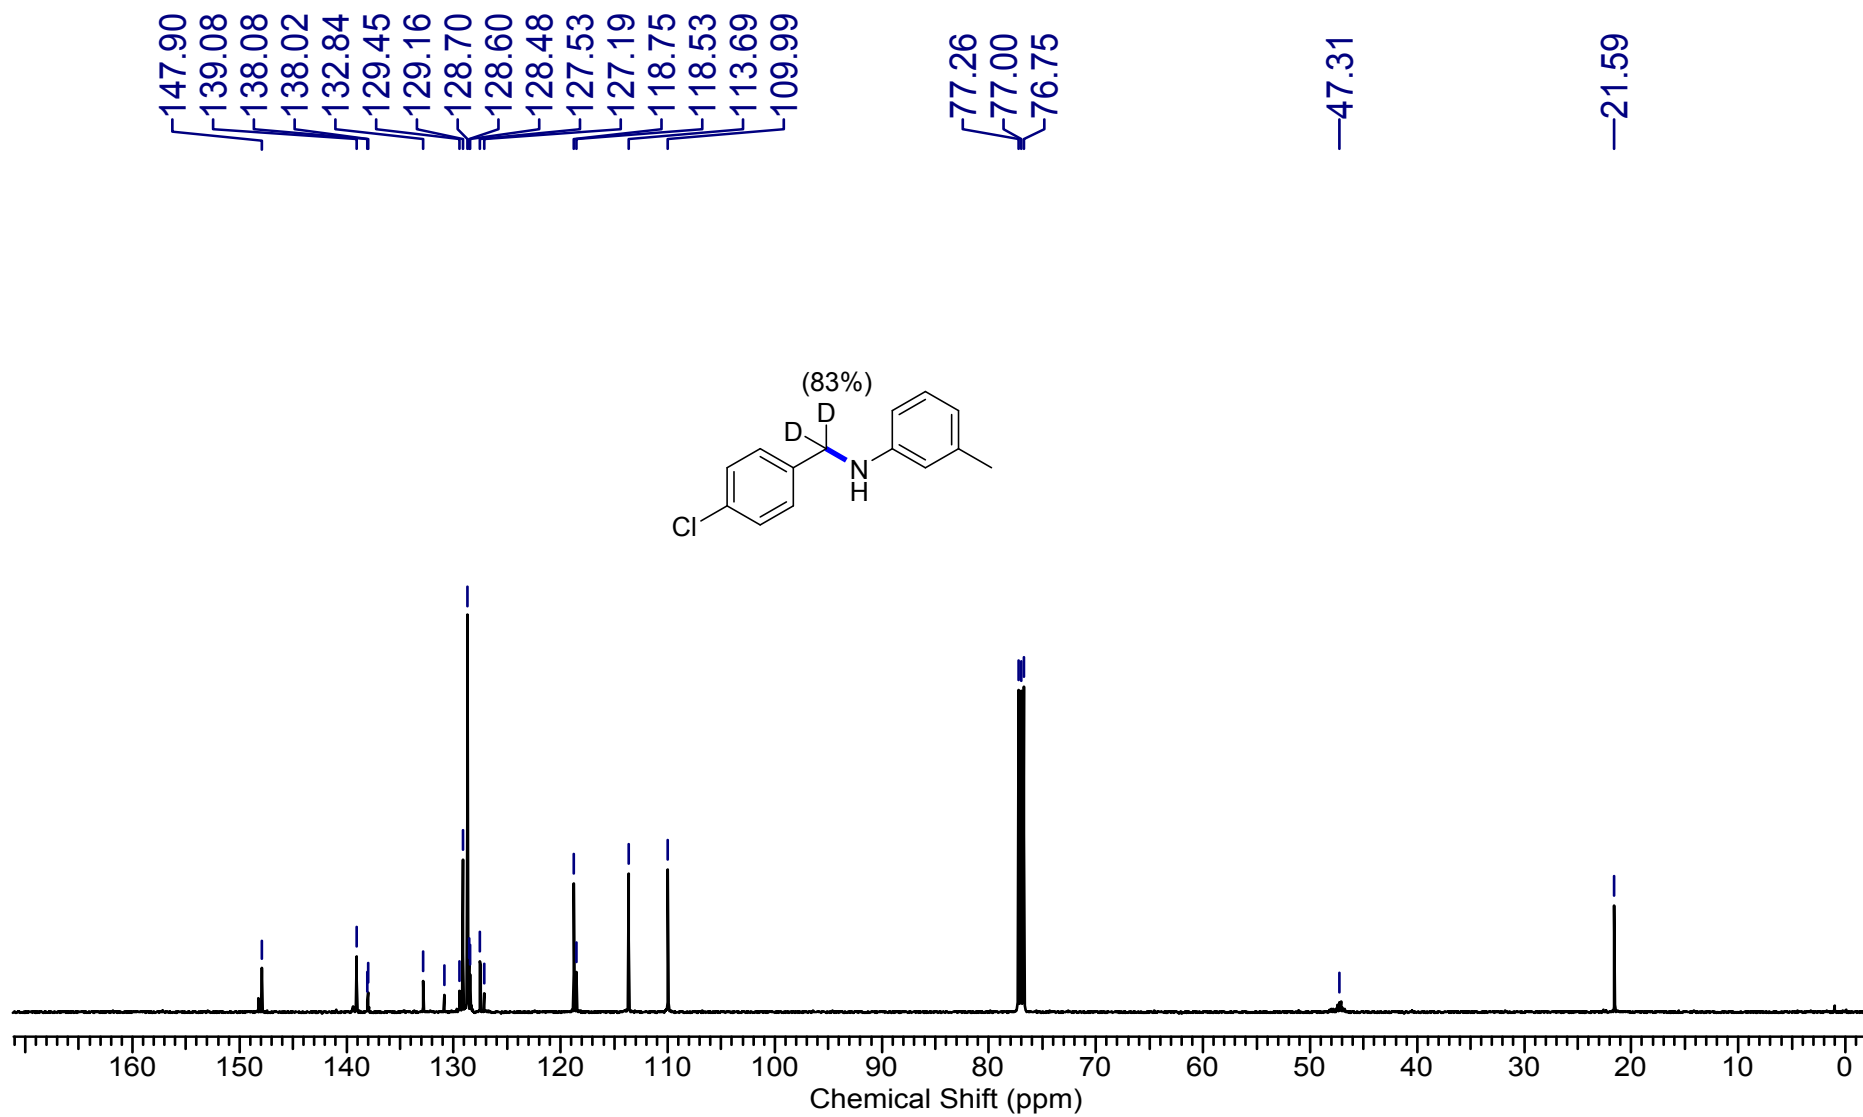

Figure S85. <sup>13</sup>C of D-5c
